# Supplementary material for: TopBP1 biomolecular condensates as a new therapeutic target in advanced-stage colorectal cancer
Source: eLife journal article supplement (doi:10.7554/elife.106196), 2025-05-15

**Figure 2-figure  
supplement 3B**

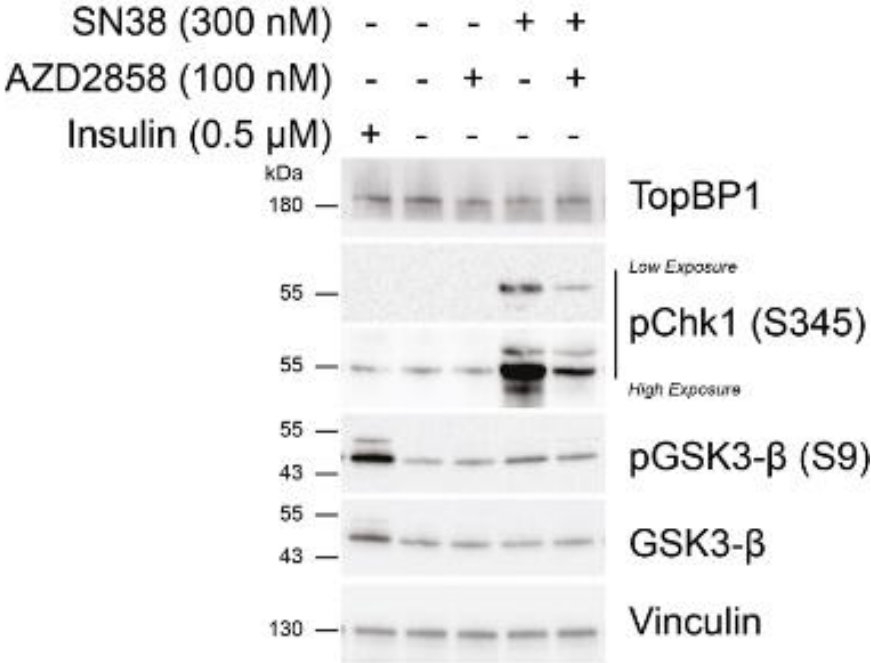

**Figure 2-figure supplement 3B:** Below are the Original membranes corresponding to Figure 2-figure supplement 3B Immunoblot of indicated proteins after incubation of HCT116 cells with AZD2858 (100 nM) or/and SN-38 (300 nM), or insulin (0.5  $\mu$ M) (positive control of GSK-3 $\beta$  inhibition).

Merge chemiluminescence bands/colorimetric for pChk1 low

pChk1(S345)

72 kDa  
55 kDa

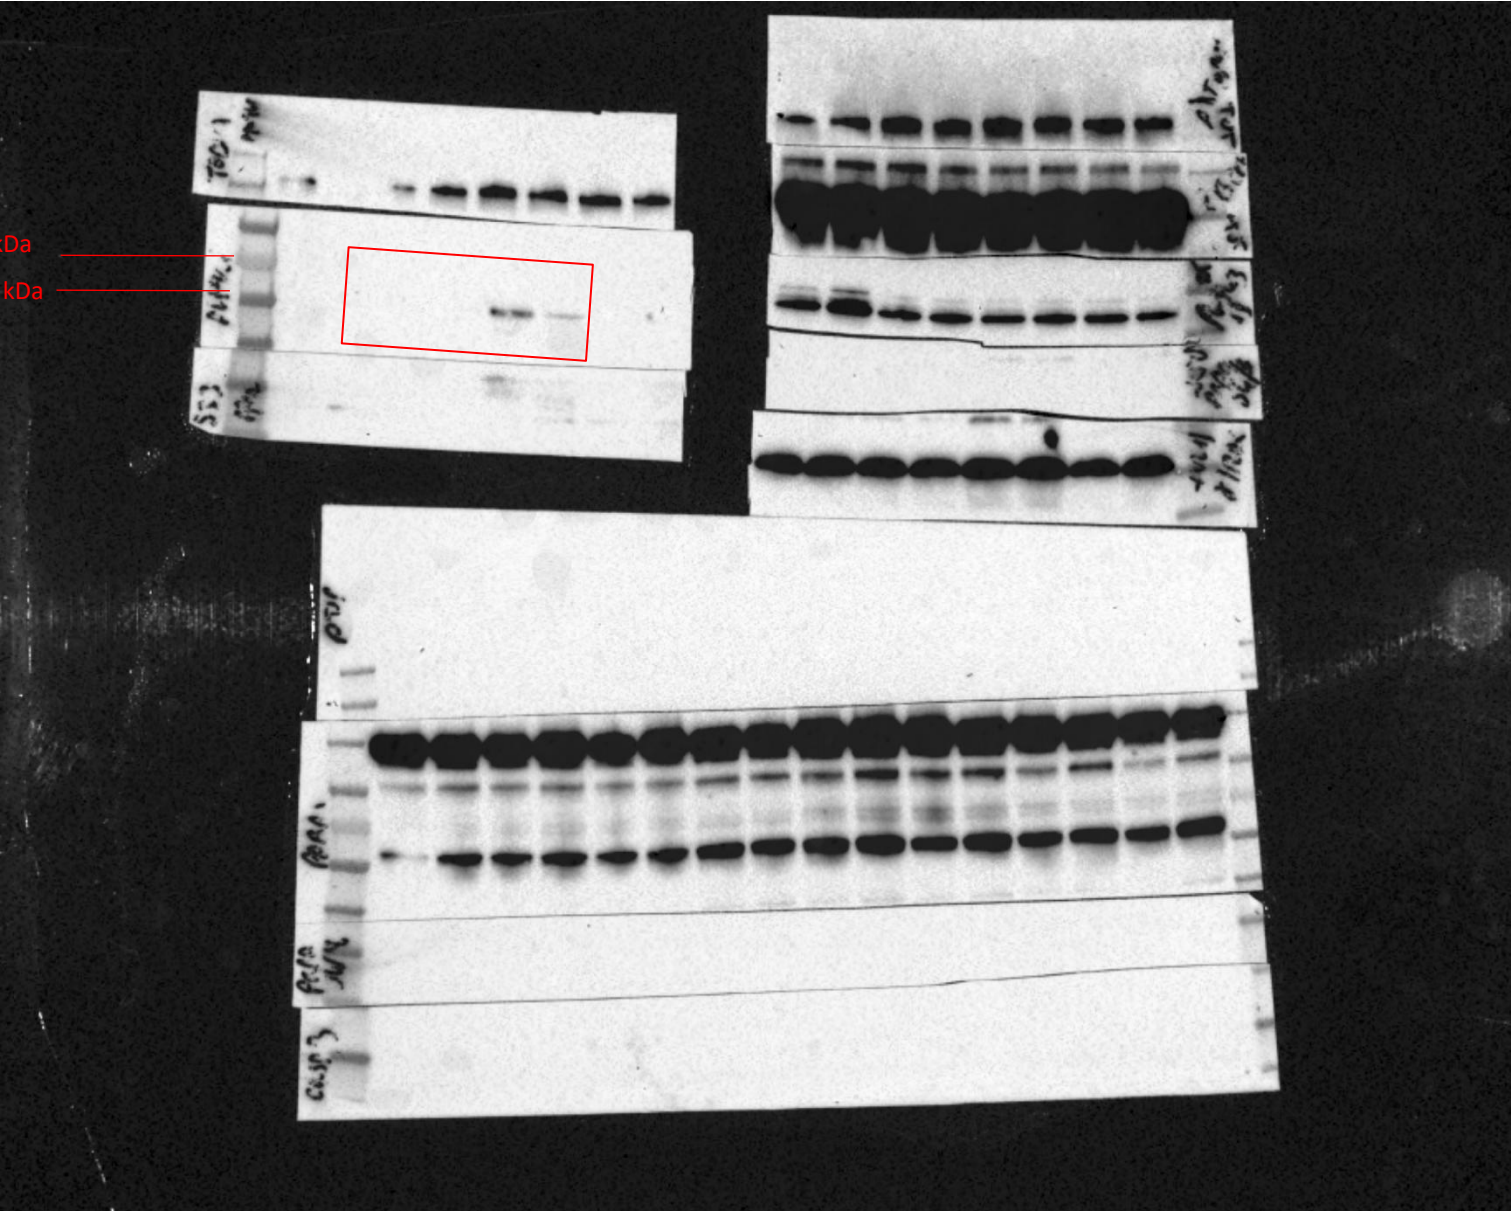

Chemiluminescence bands for pChk1 low

pChk1(S345)

72 kDa  
55 kDa

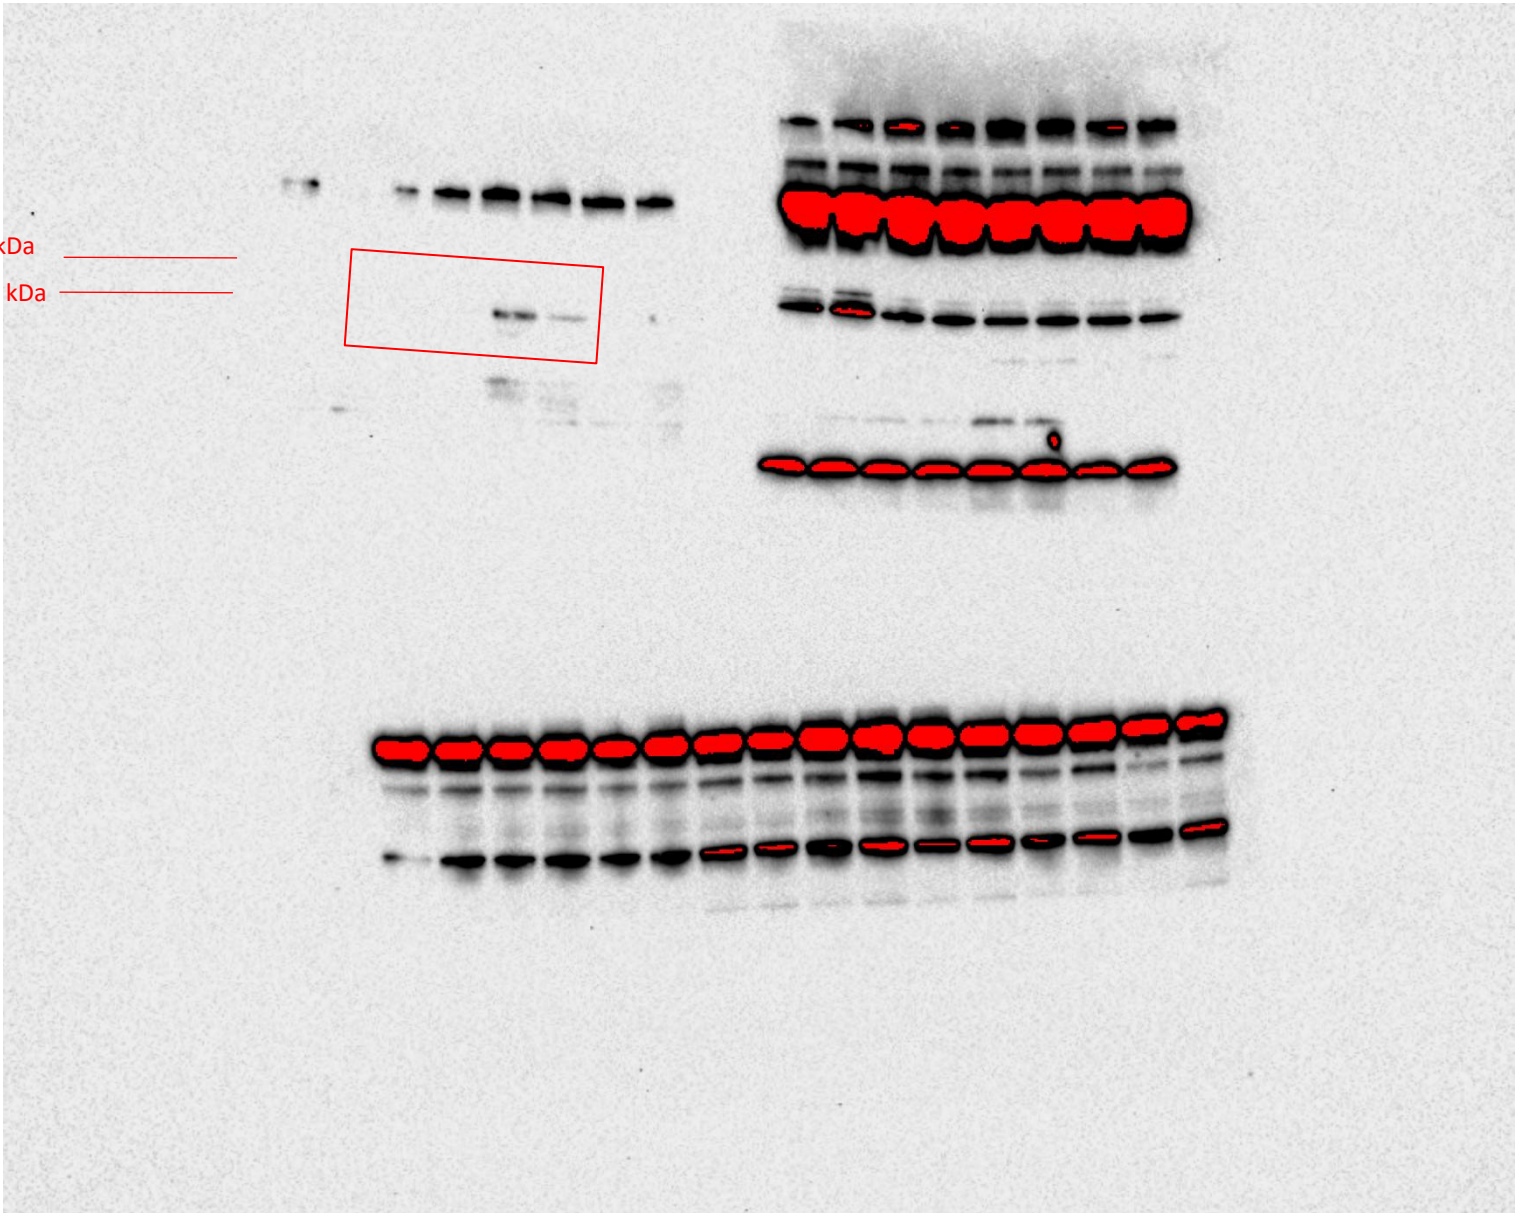

Merge chemiluminescence bands/colorimetric for GSK3b

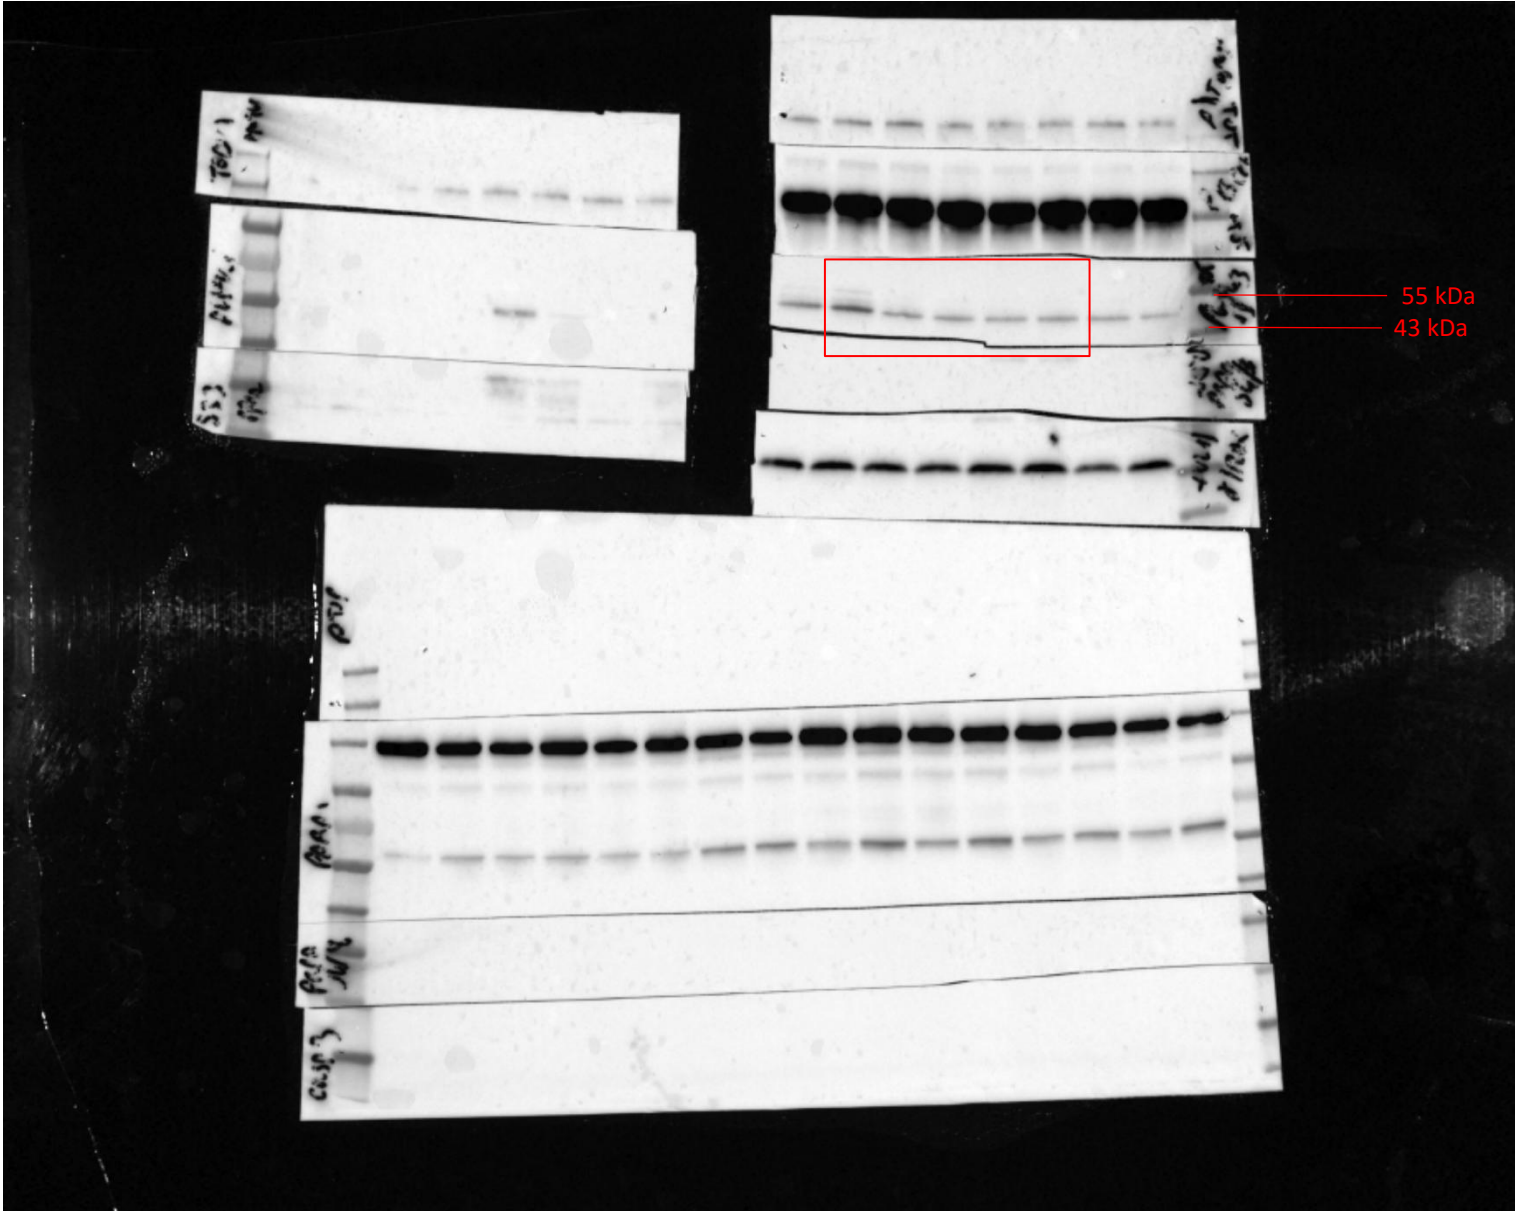

## Chemiluminescence bands for GSK3b

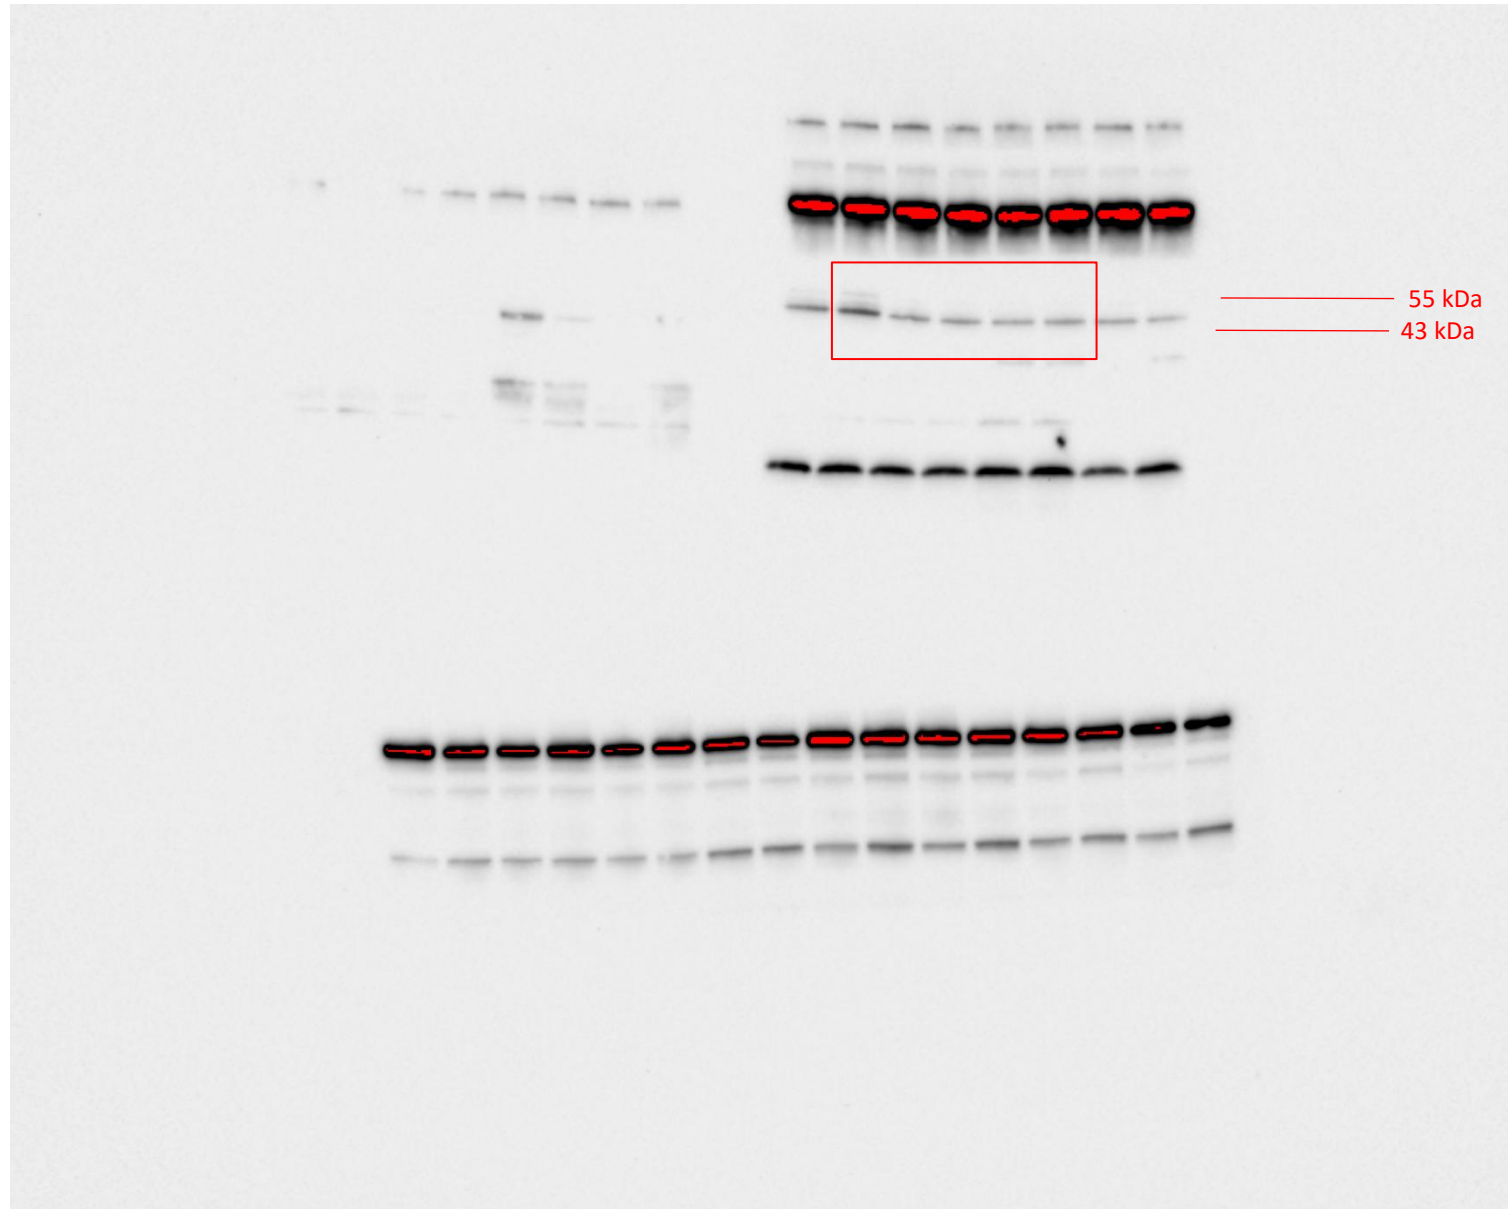

# Colorimetric for pChk1 low

pChk1(S345)

72 kDa

55 kDa

55 kDa

43 kDa

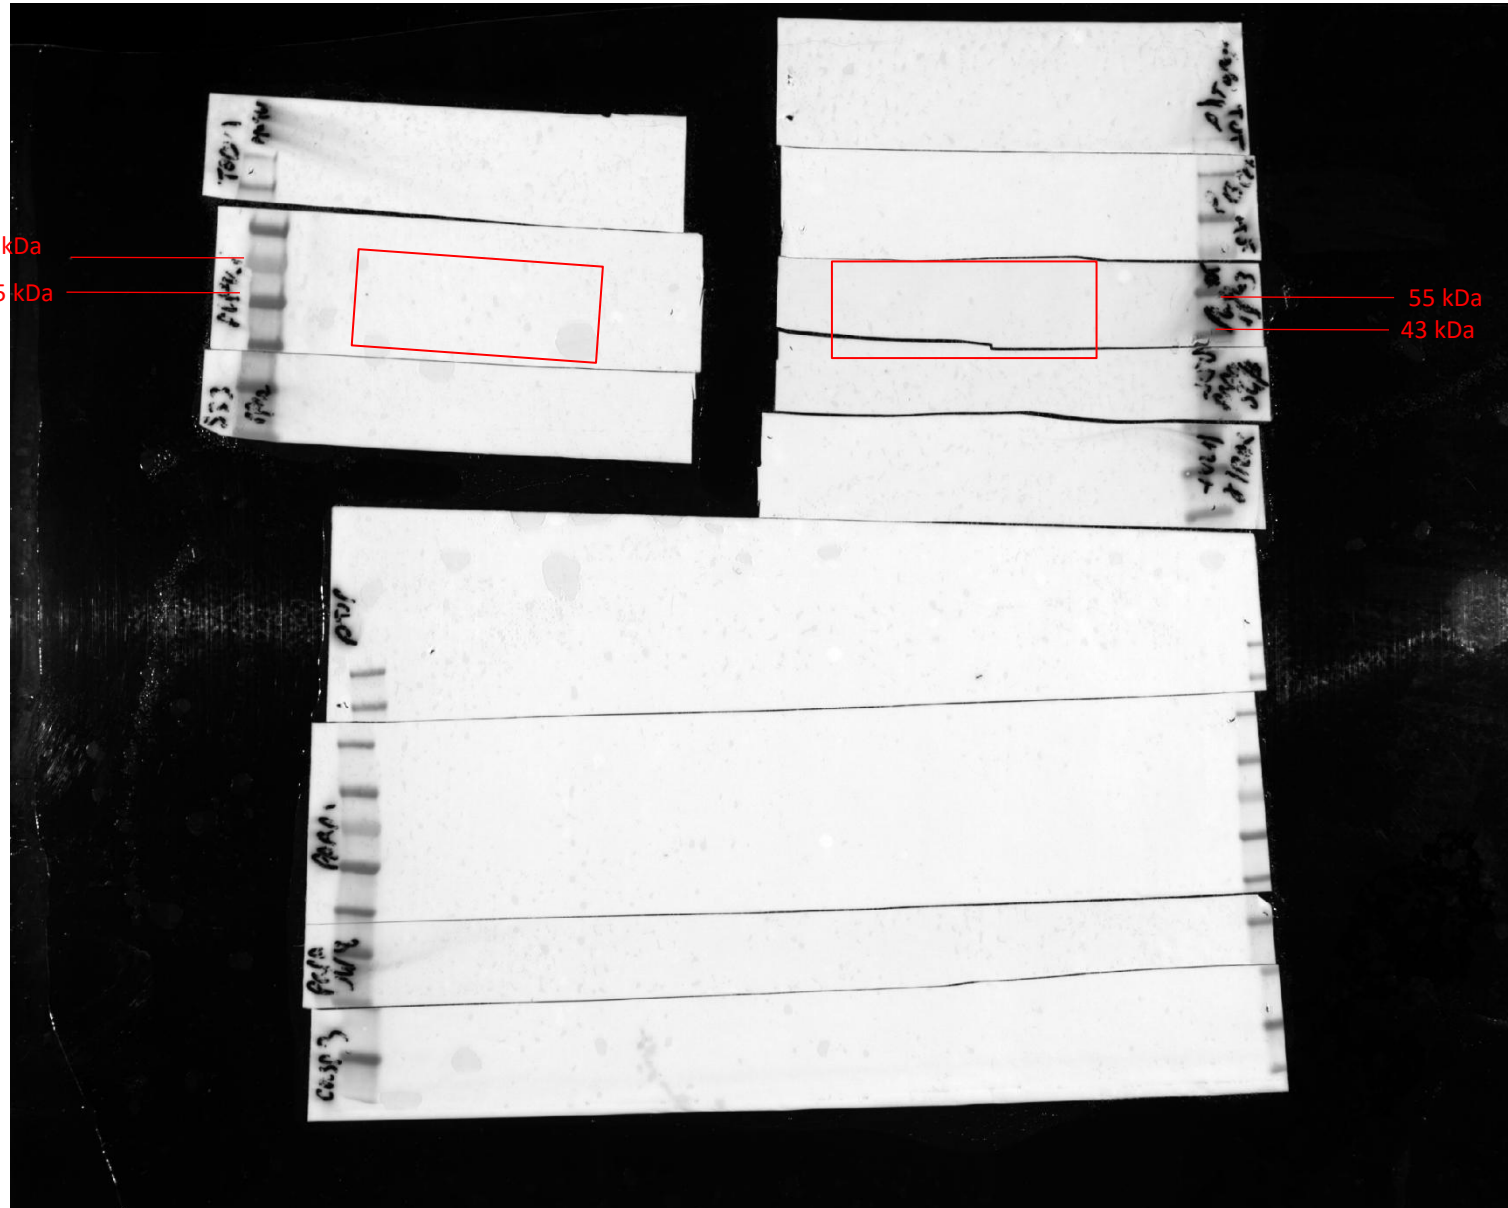

Merge chemiluminescence bands/colorimetric for pChk1 high

pChk1(S345)

72 kDa  
55 kDa

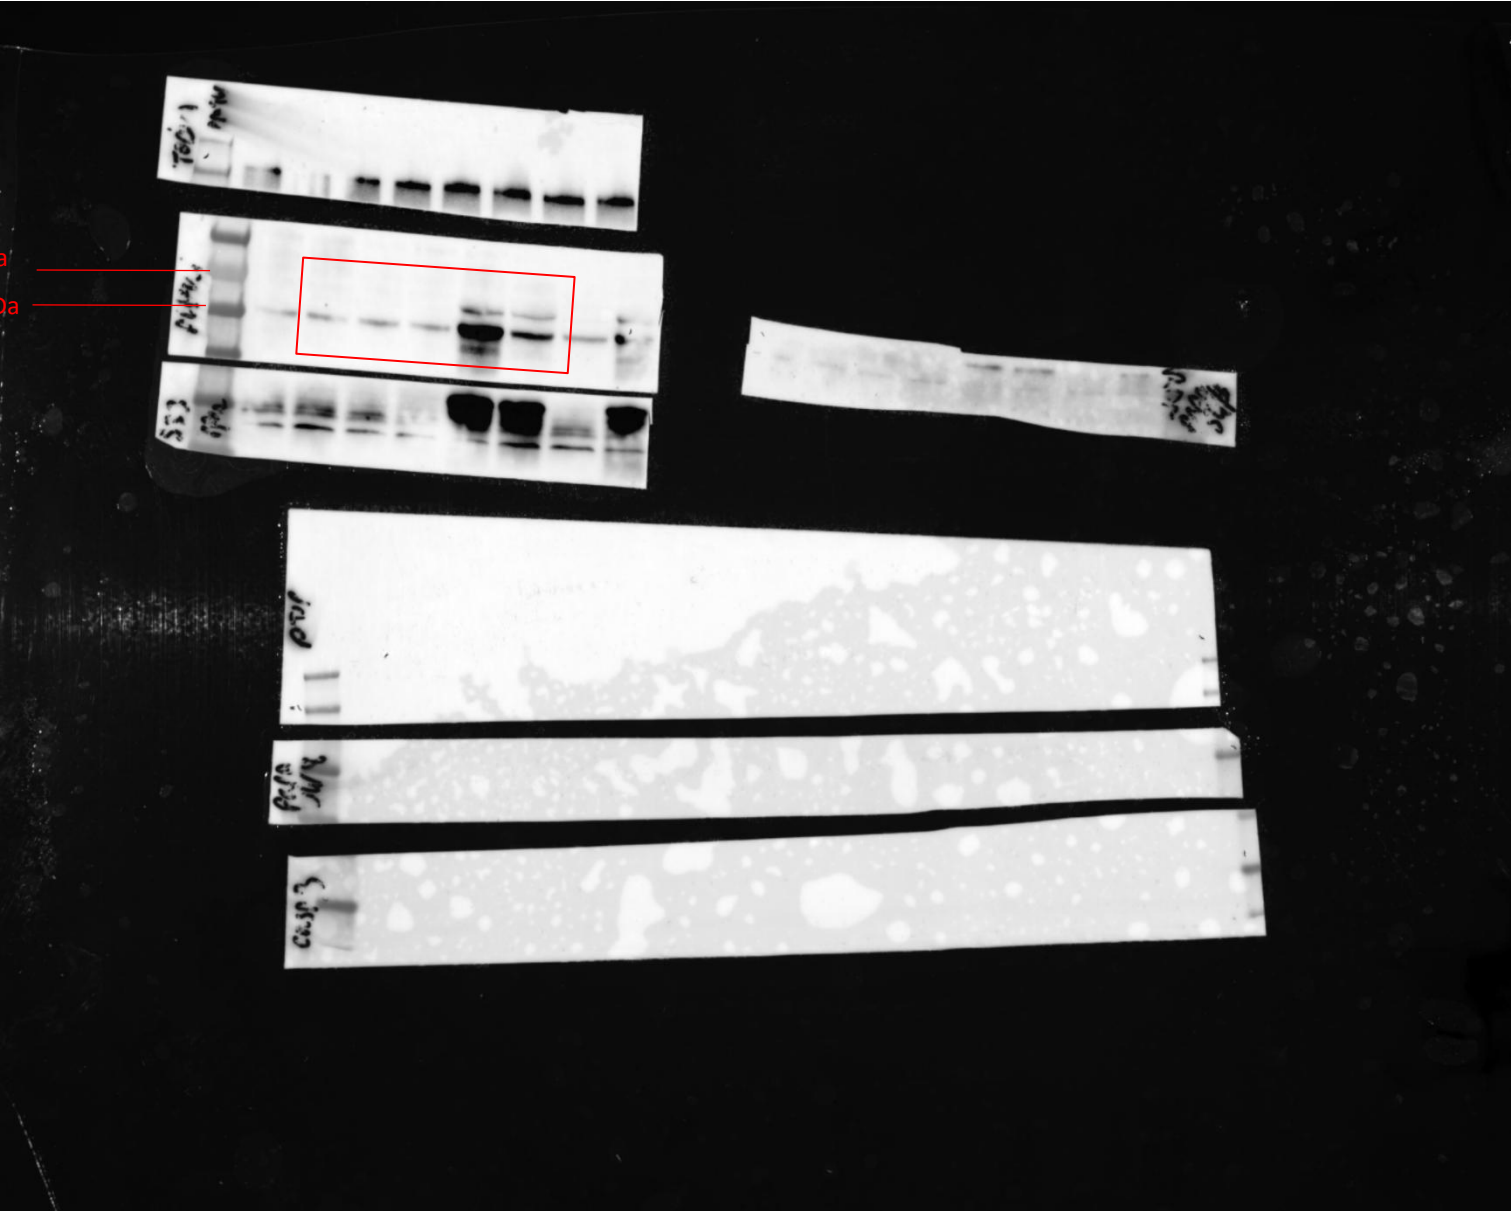

Chemiluminescence bands for pChk1 high

pChk1(S345)

72 kDa  
55 kDa

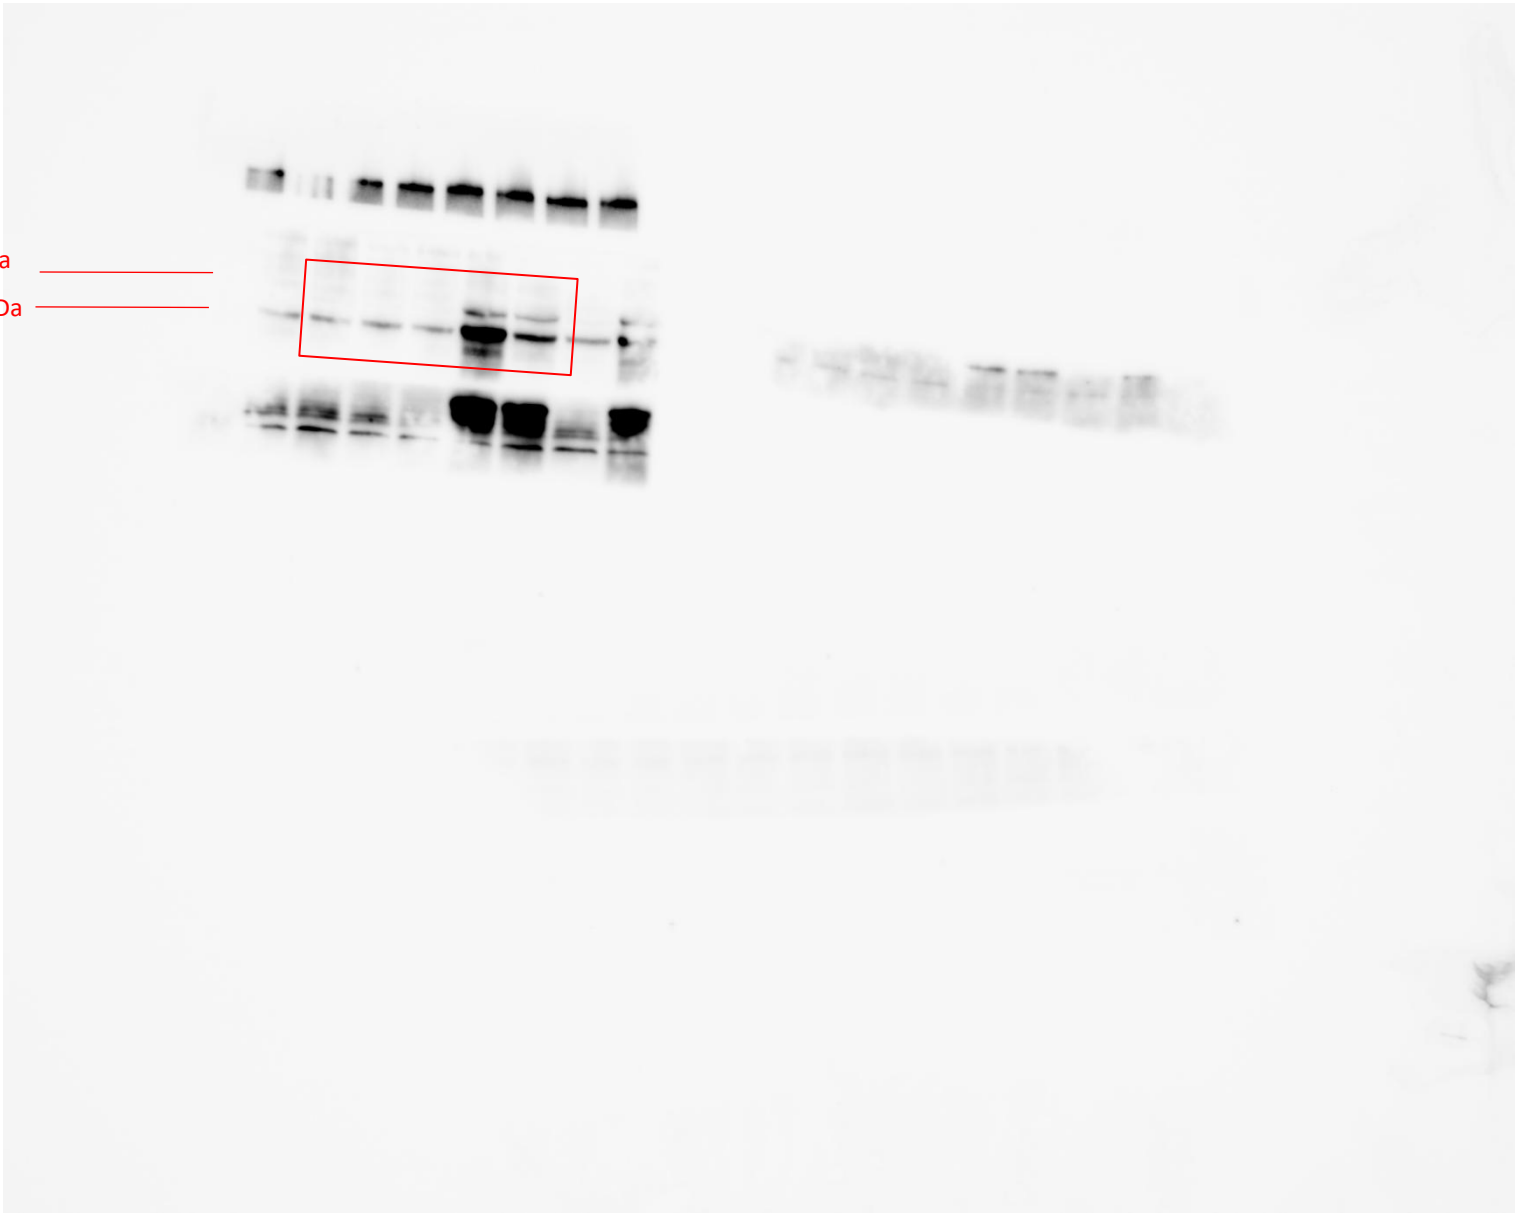

# Colorimetric for pChk1 high

pChk1(S345)

72 kDa

55 kDa

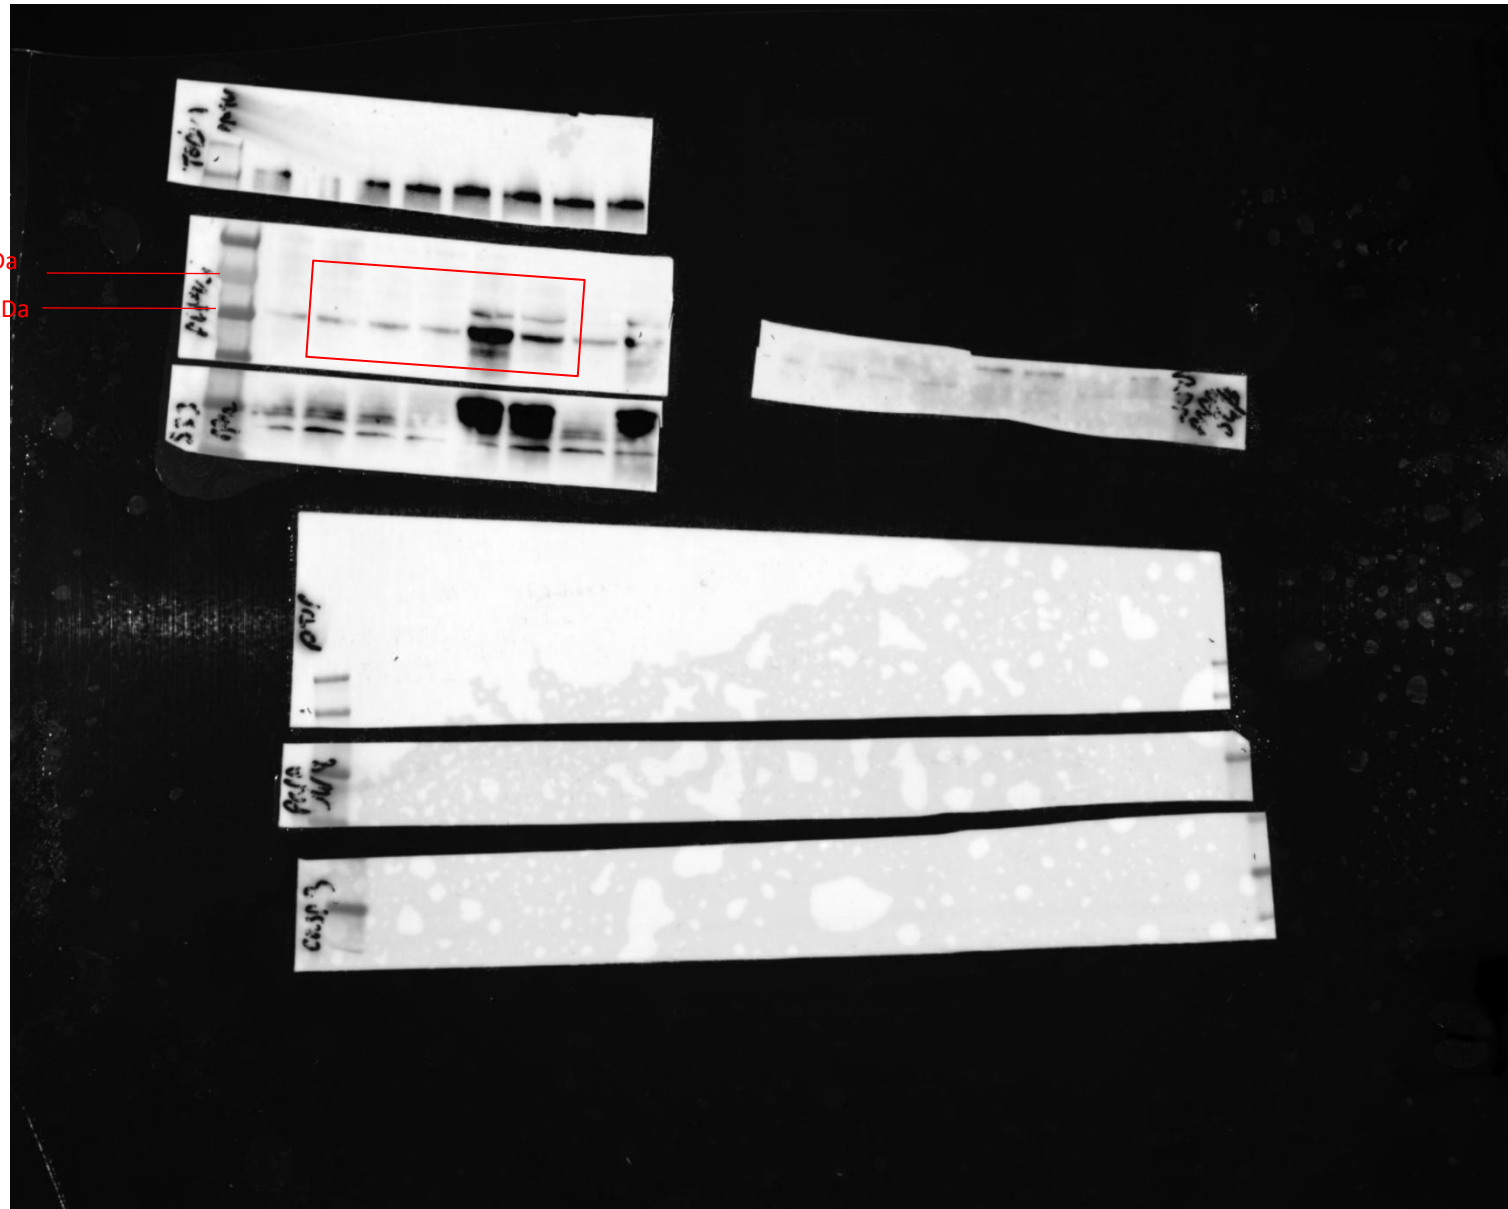

Merge chemiluminescence bands/colorimetric for TopBP1

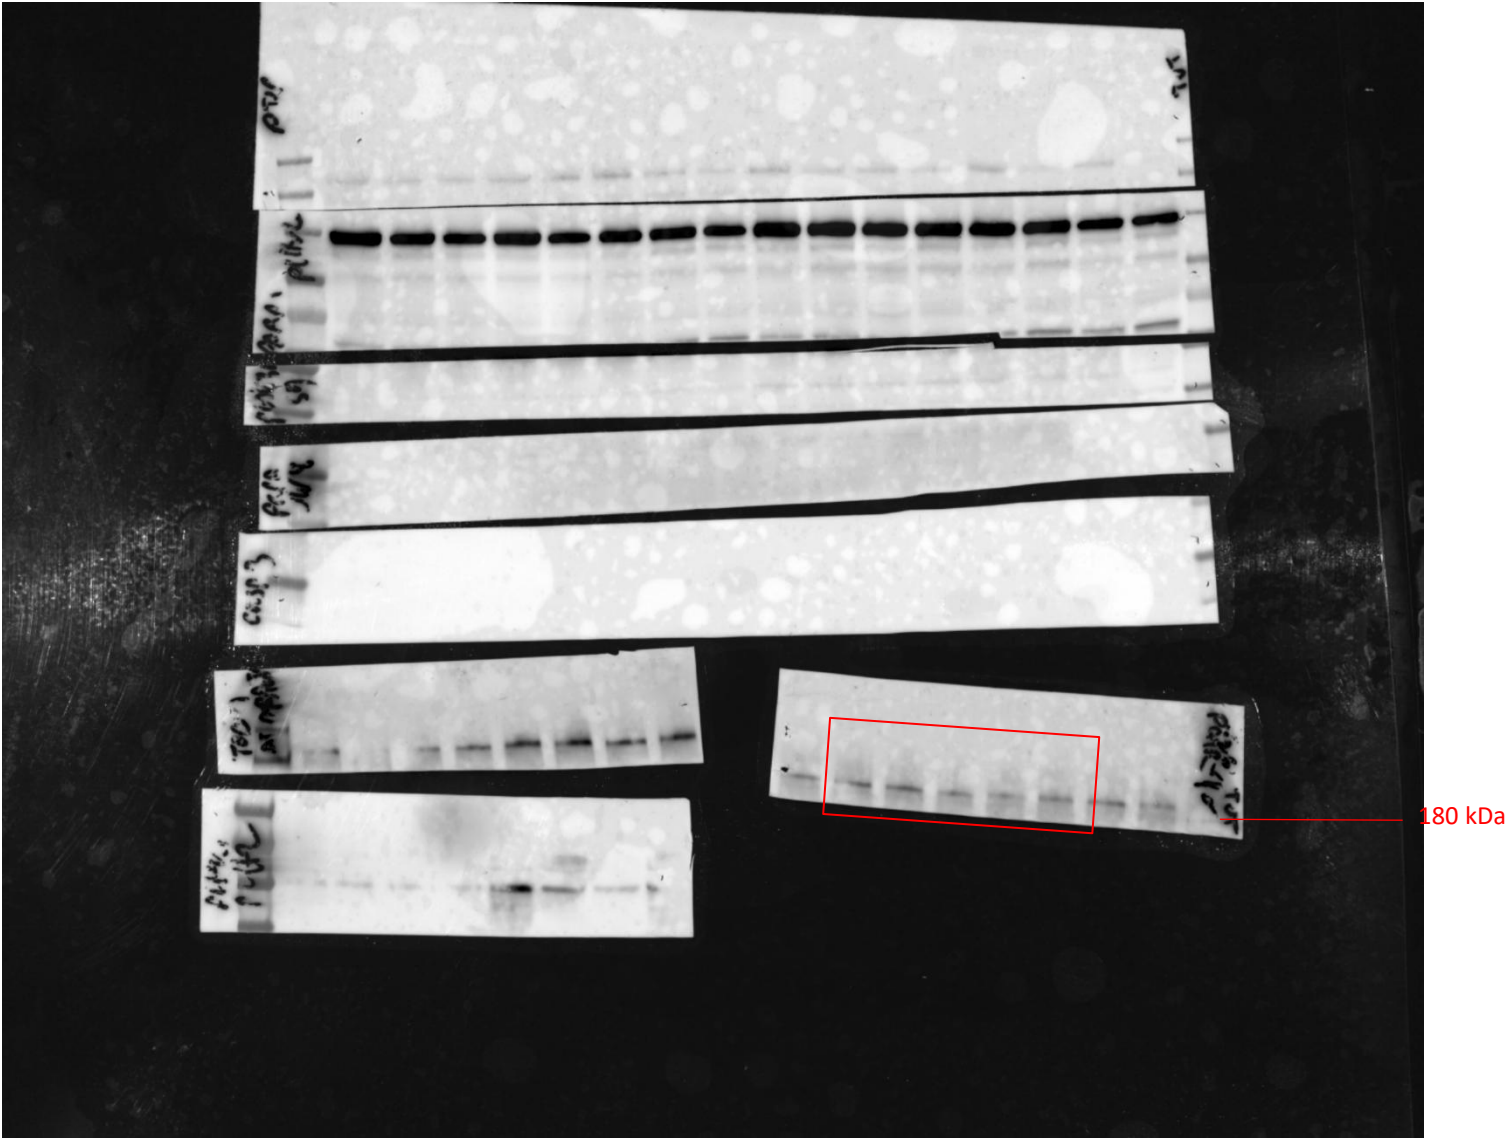

TopBP1

chemiluminescence for TopBP1

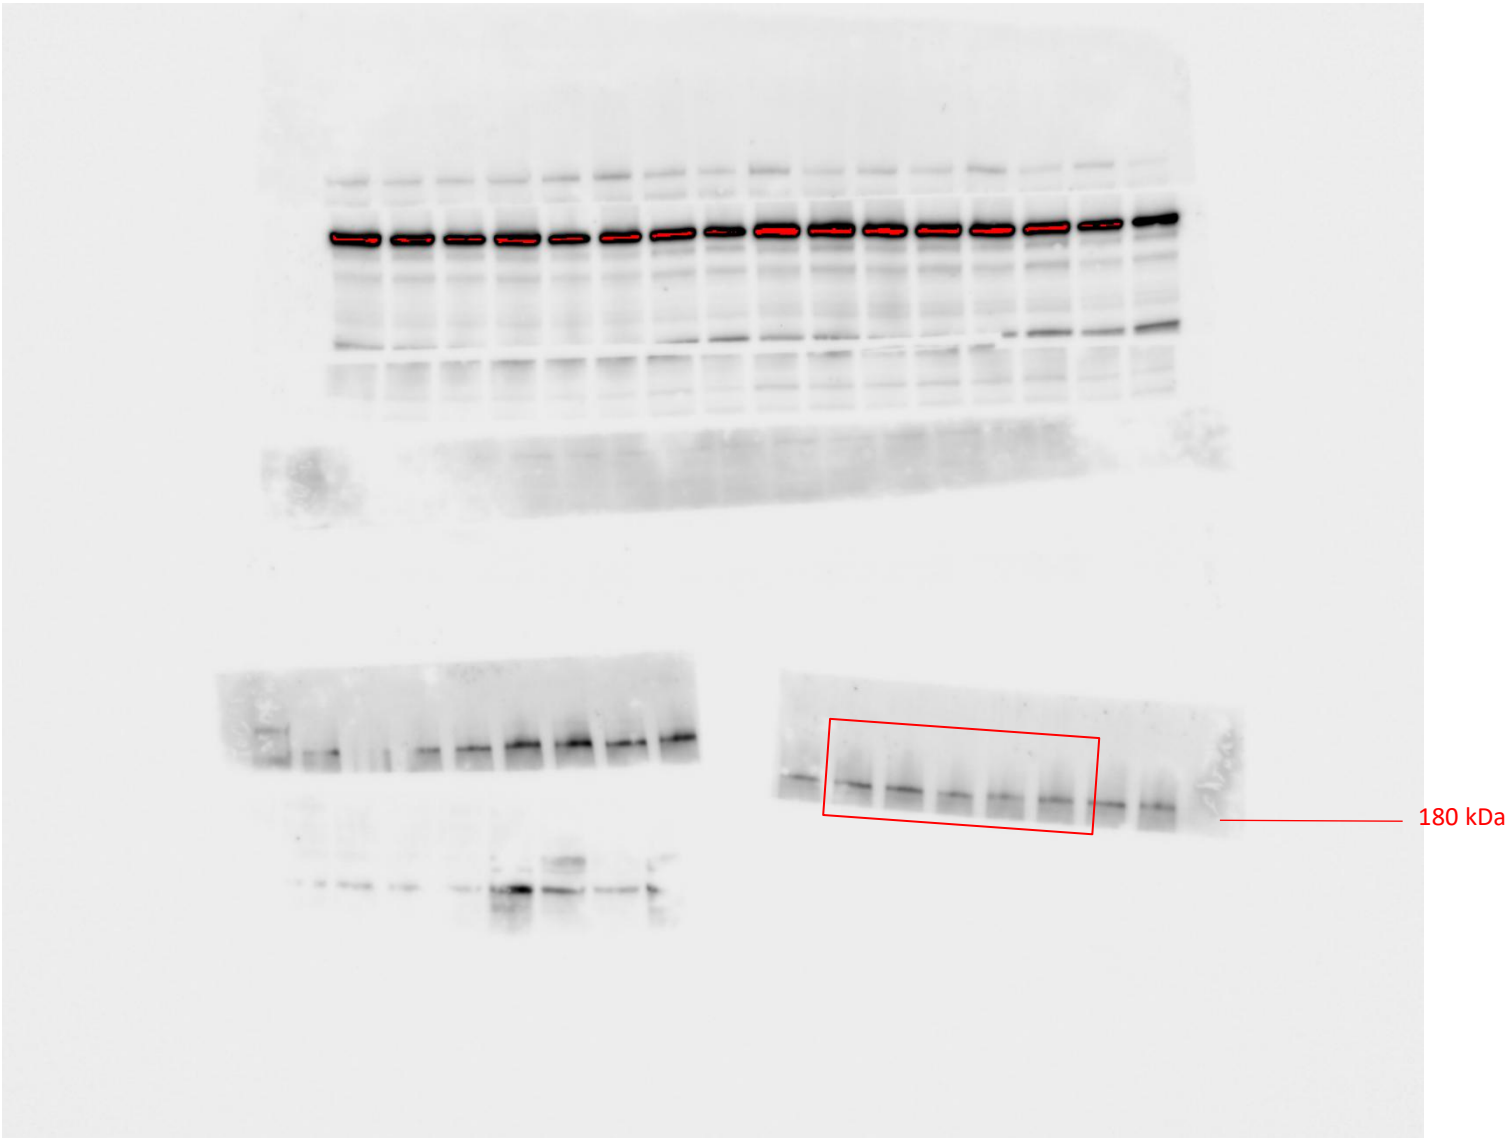

TopBP1

Merge chemiluminescence bands/colorimetric for TopBP1

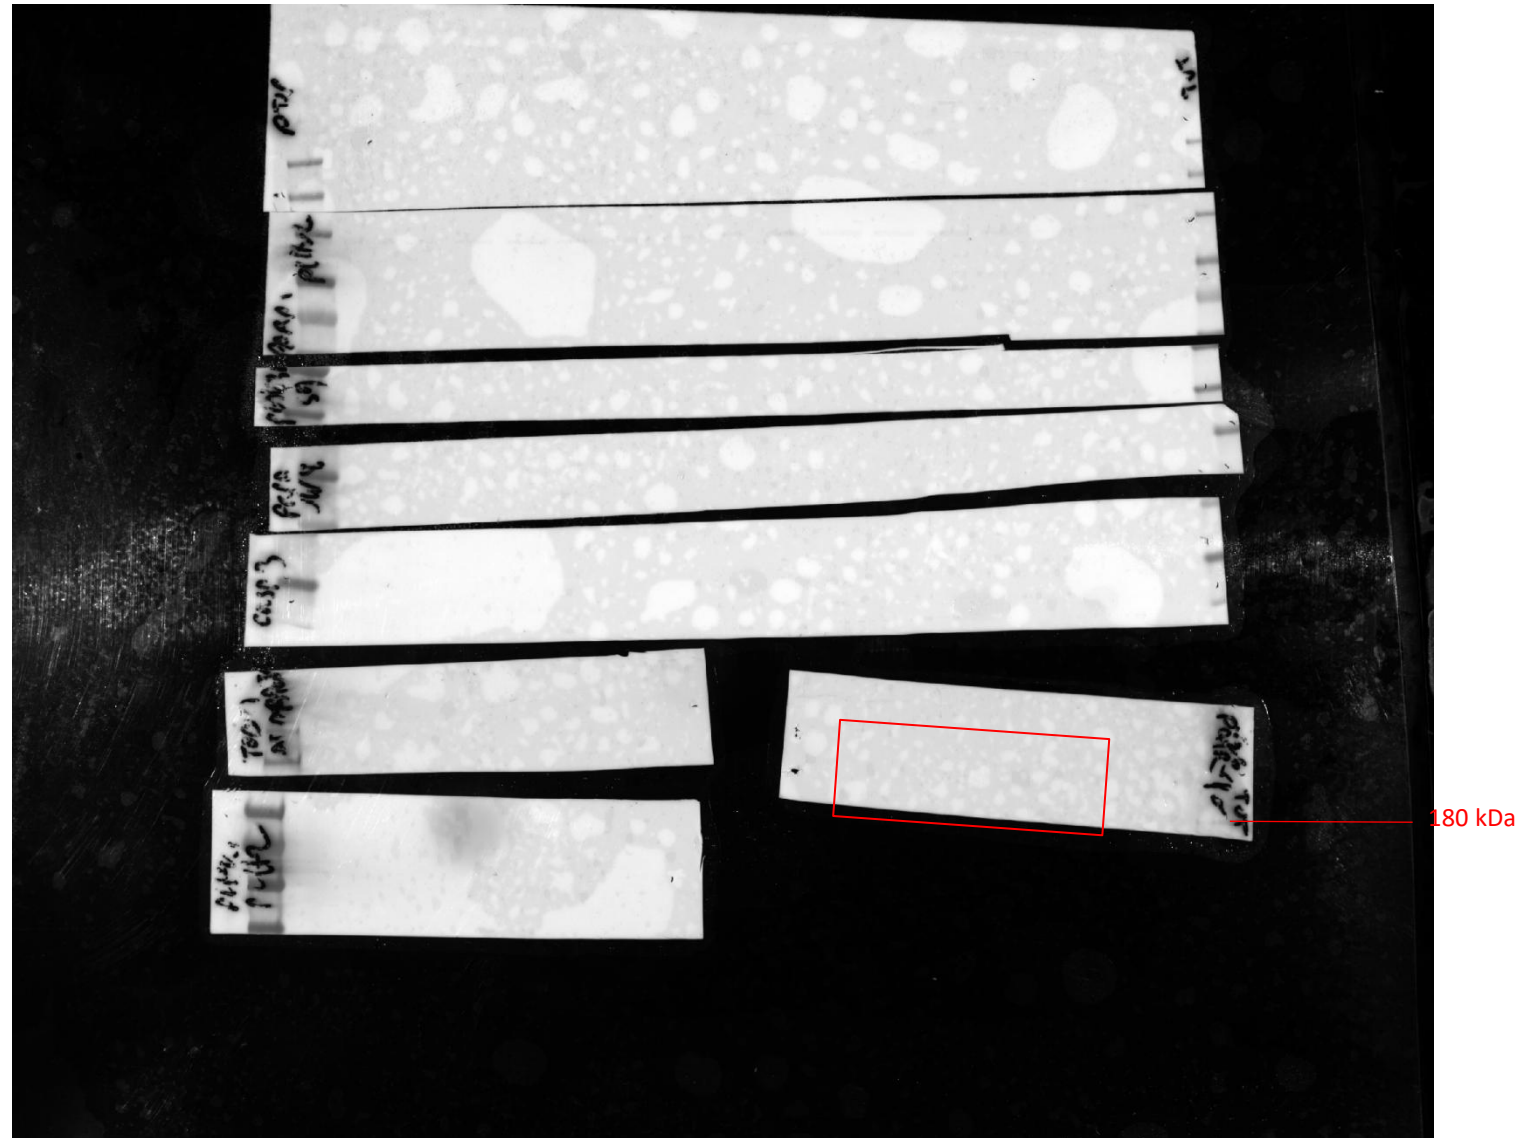

TopBP1

Merge chemiluminescence bands/colorimetric for pGSK3 S9

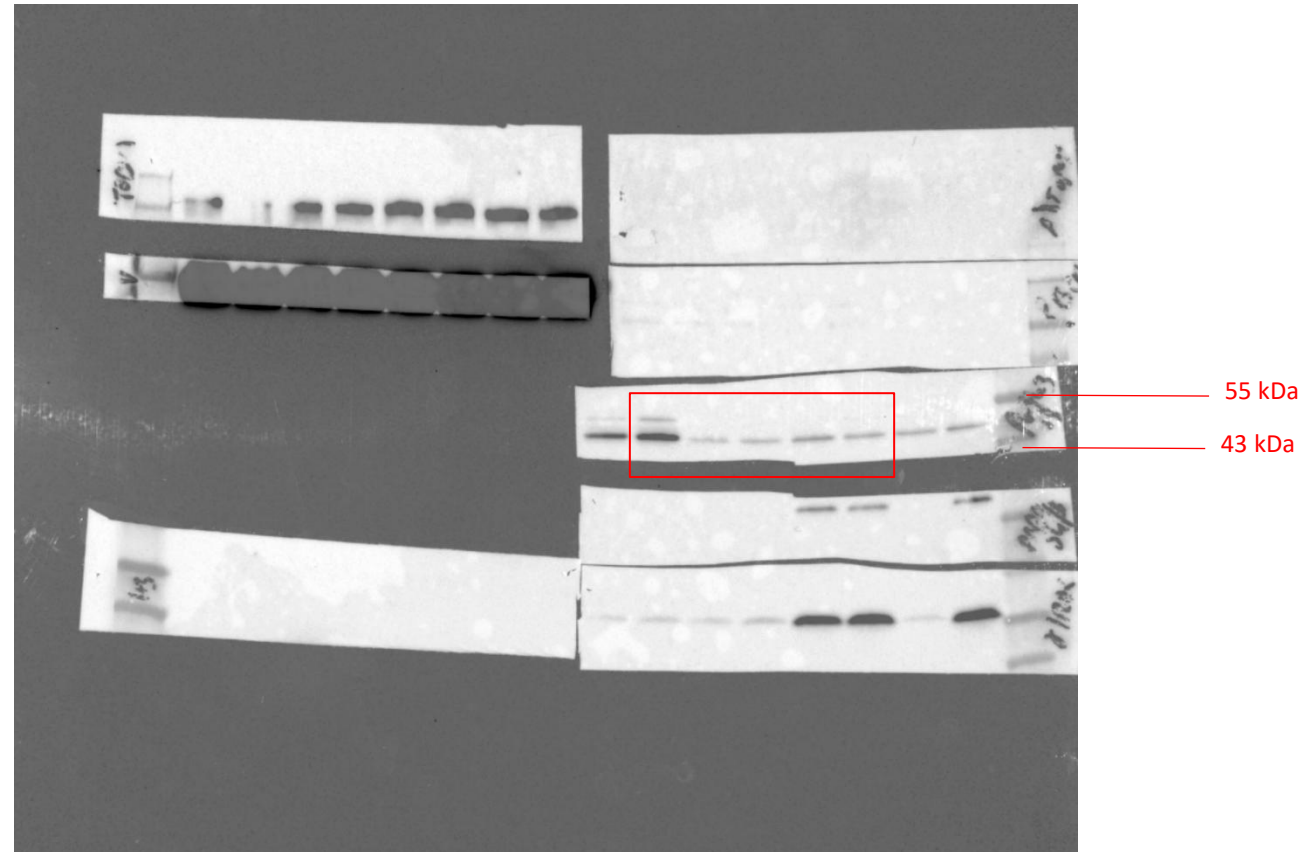

pGSK3-b

## Chemiluminescence bands for pGSK3 S9

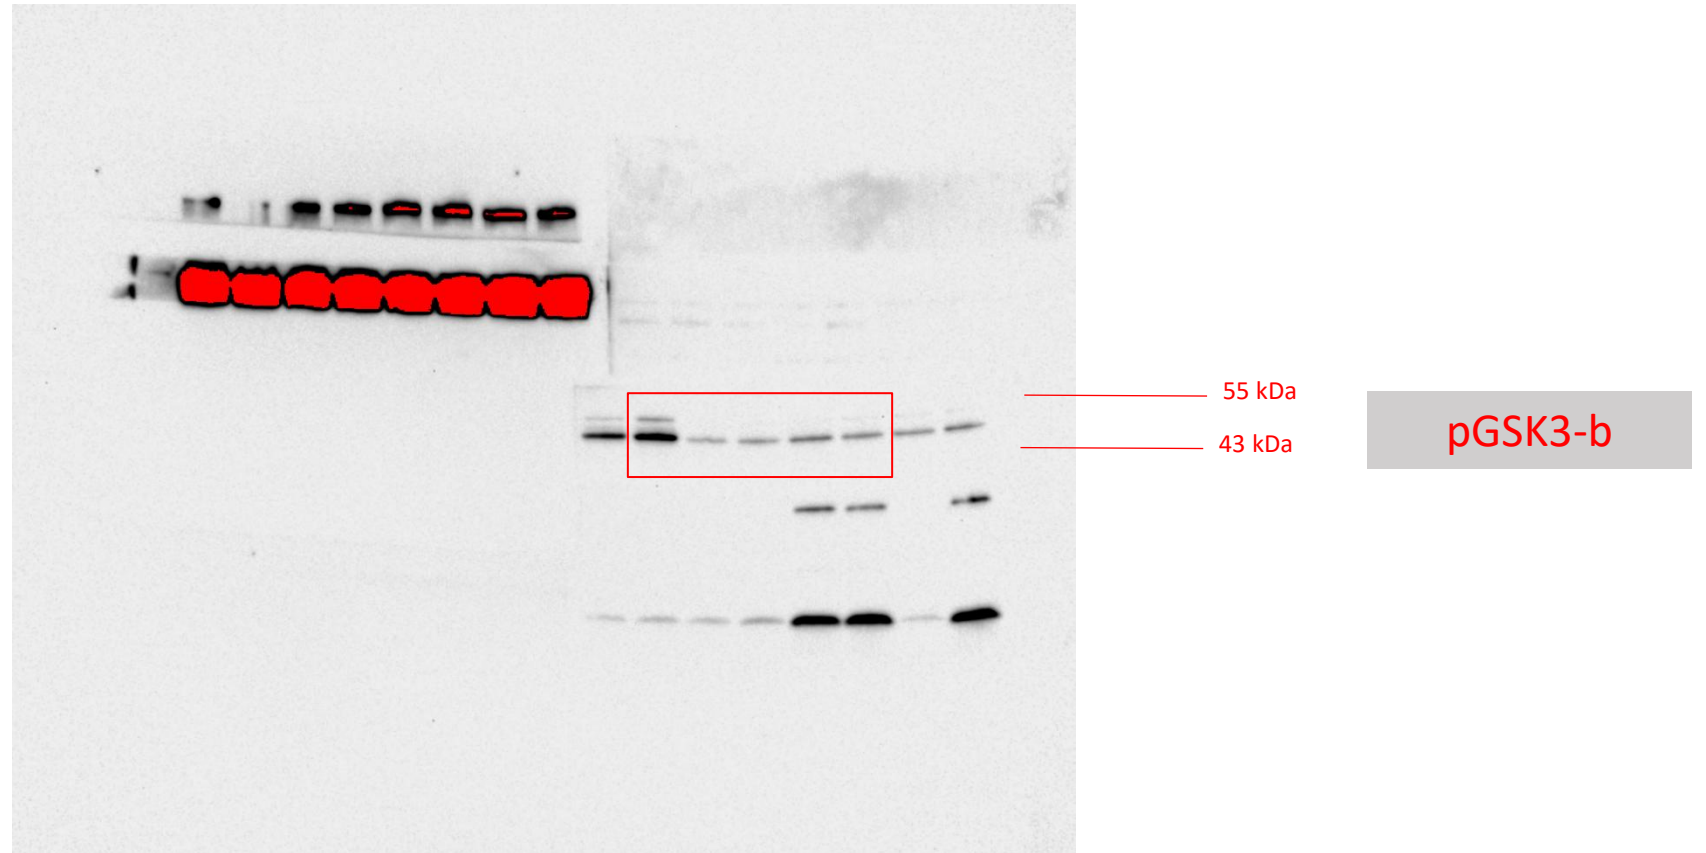

Merge chemiluminescence bands/colorimetric for pGSK3

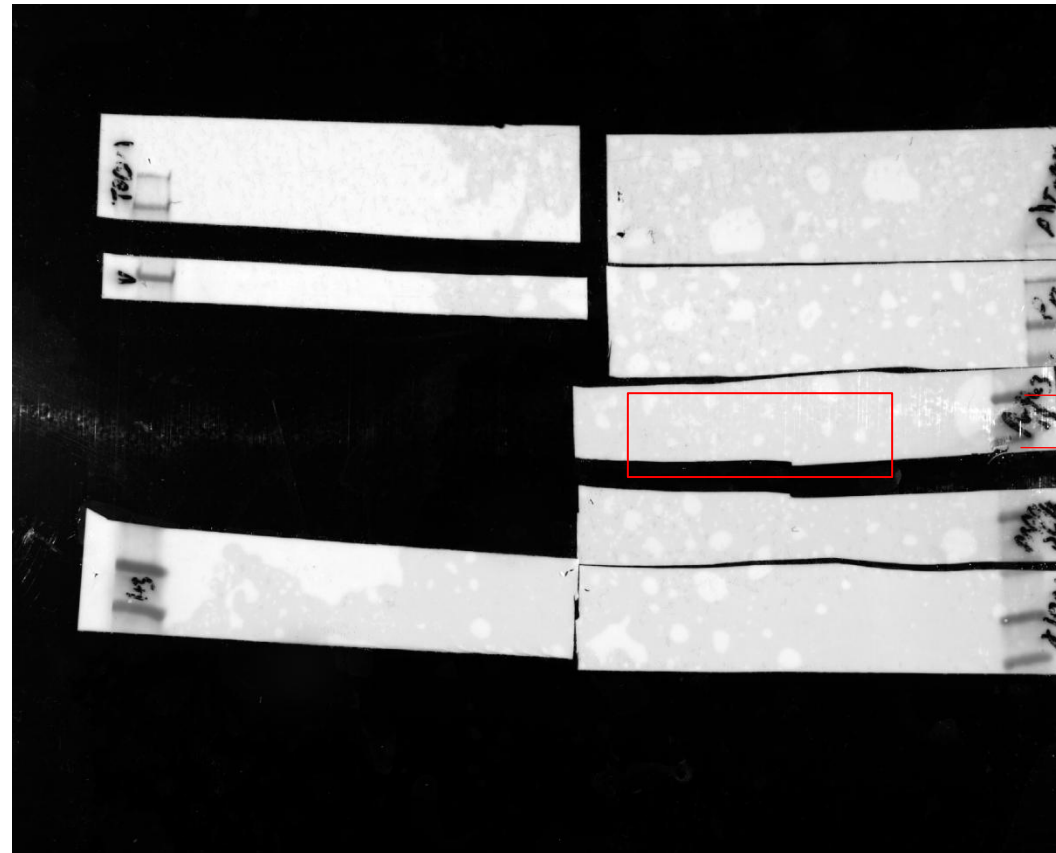

pGSK3-b

Merge chemiluminescence bands/colorimetric for Vinculin

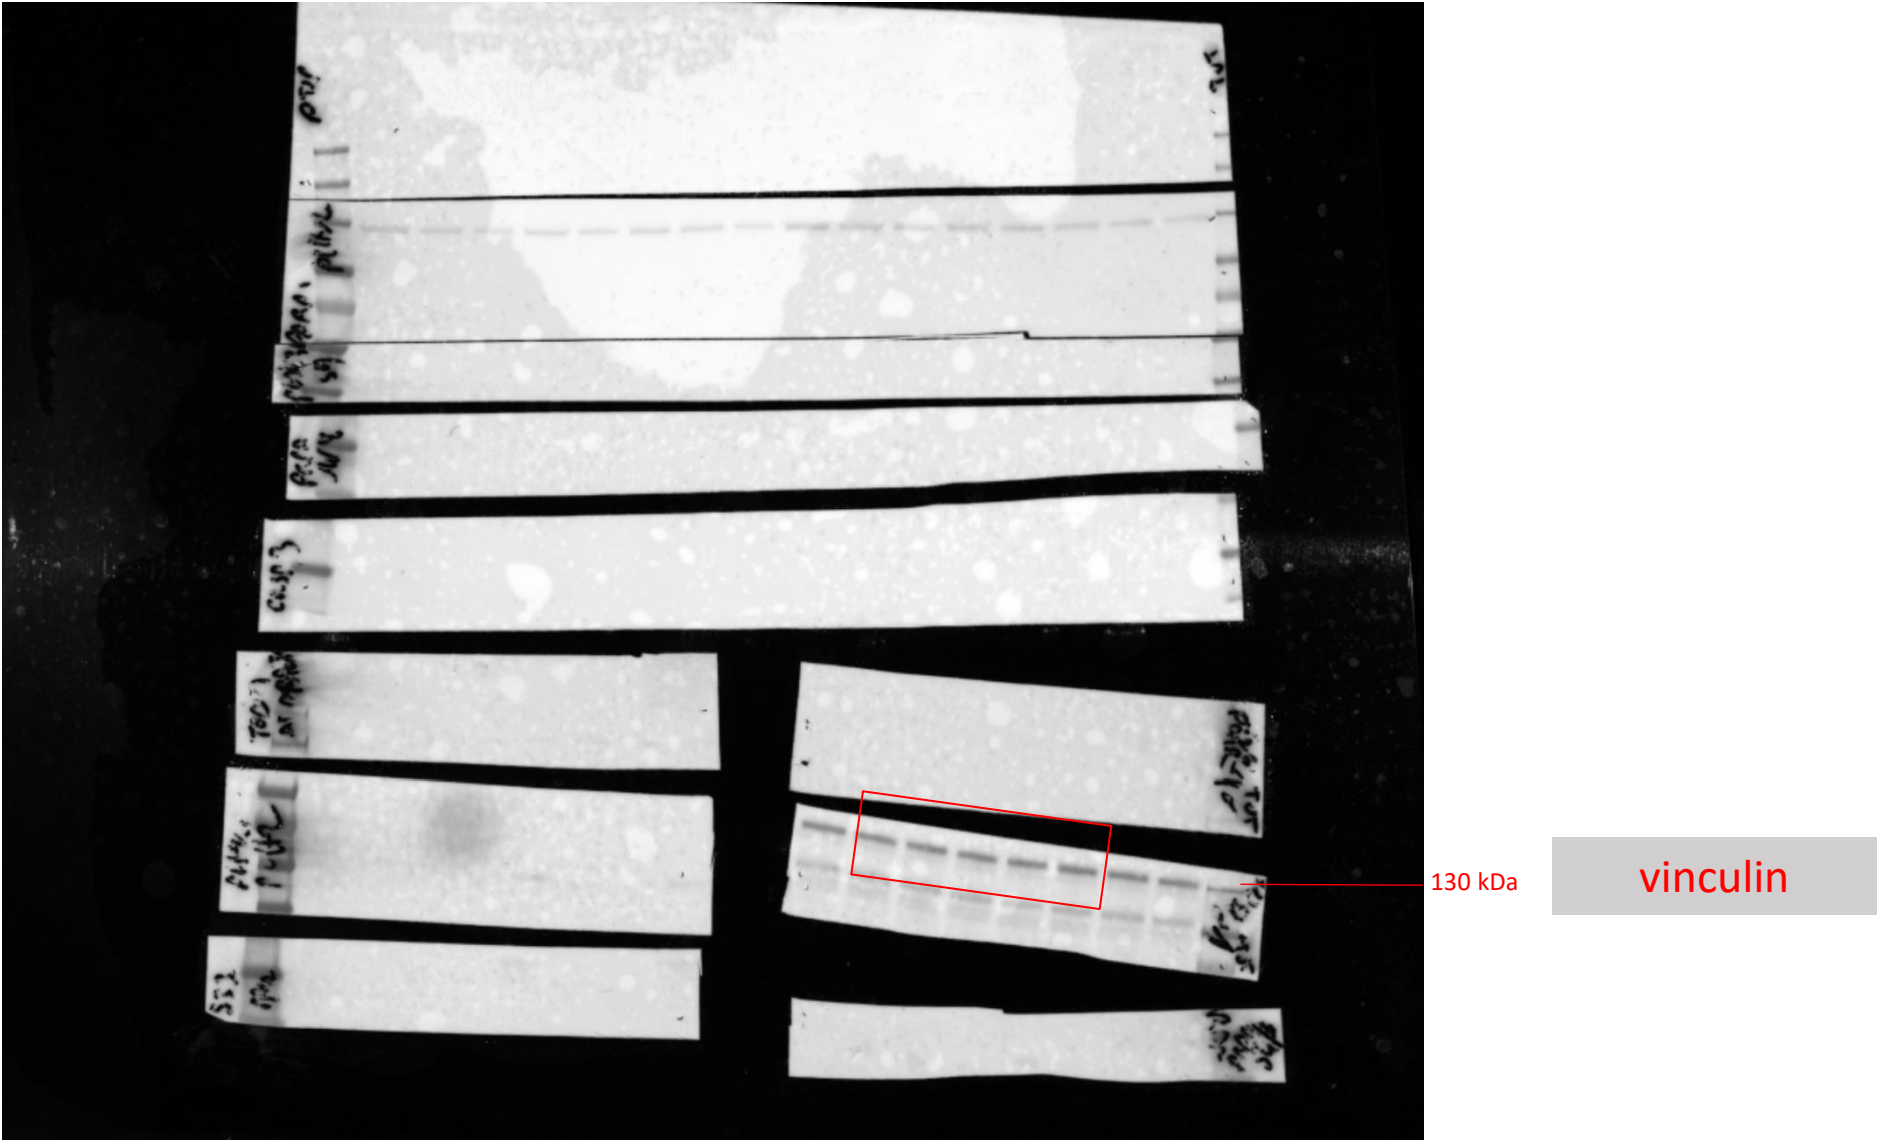

Chemiluminescence bands for Vincu

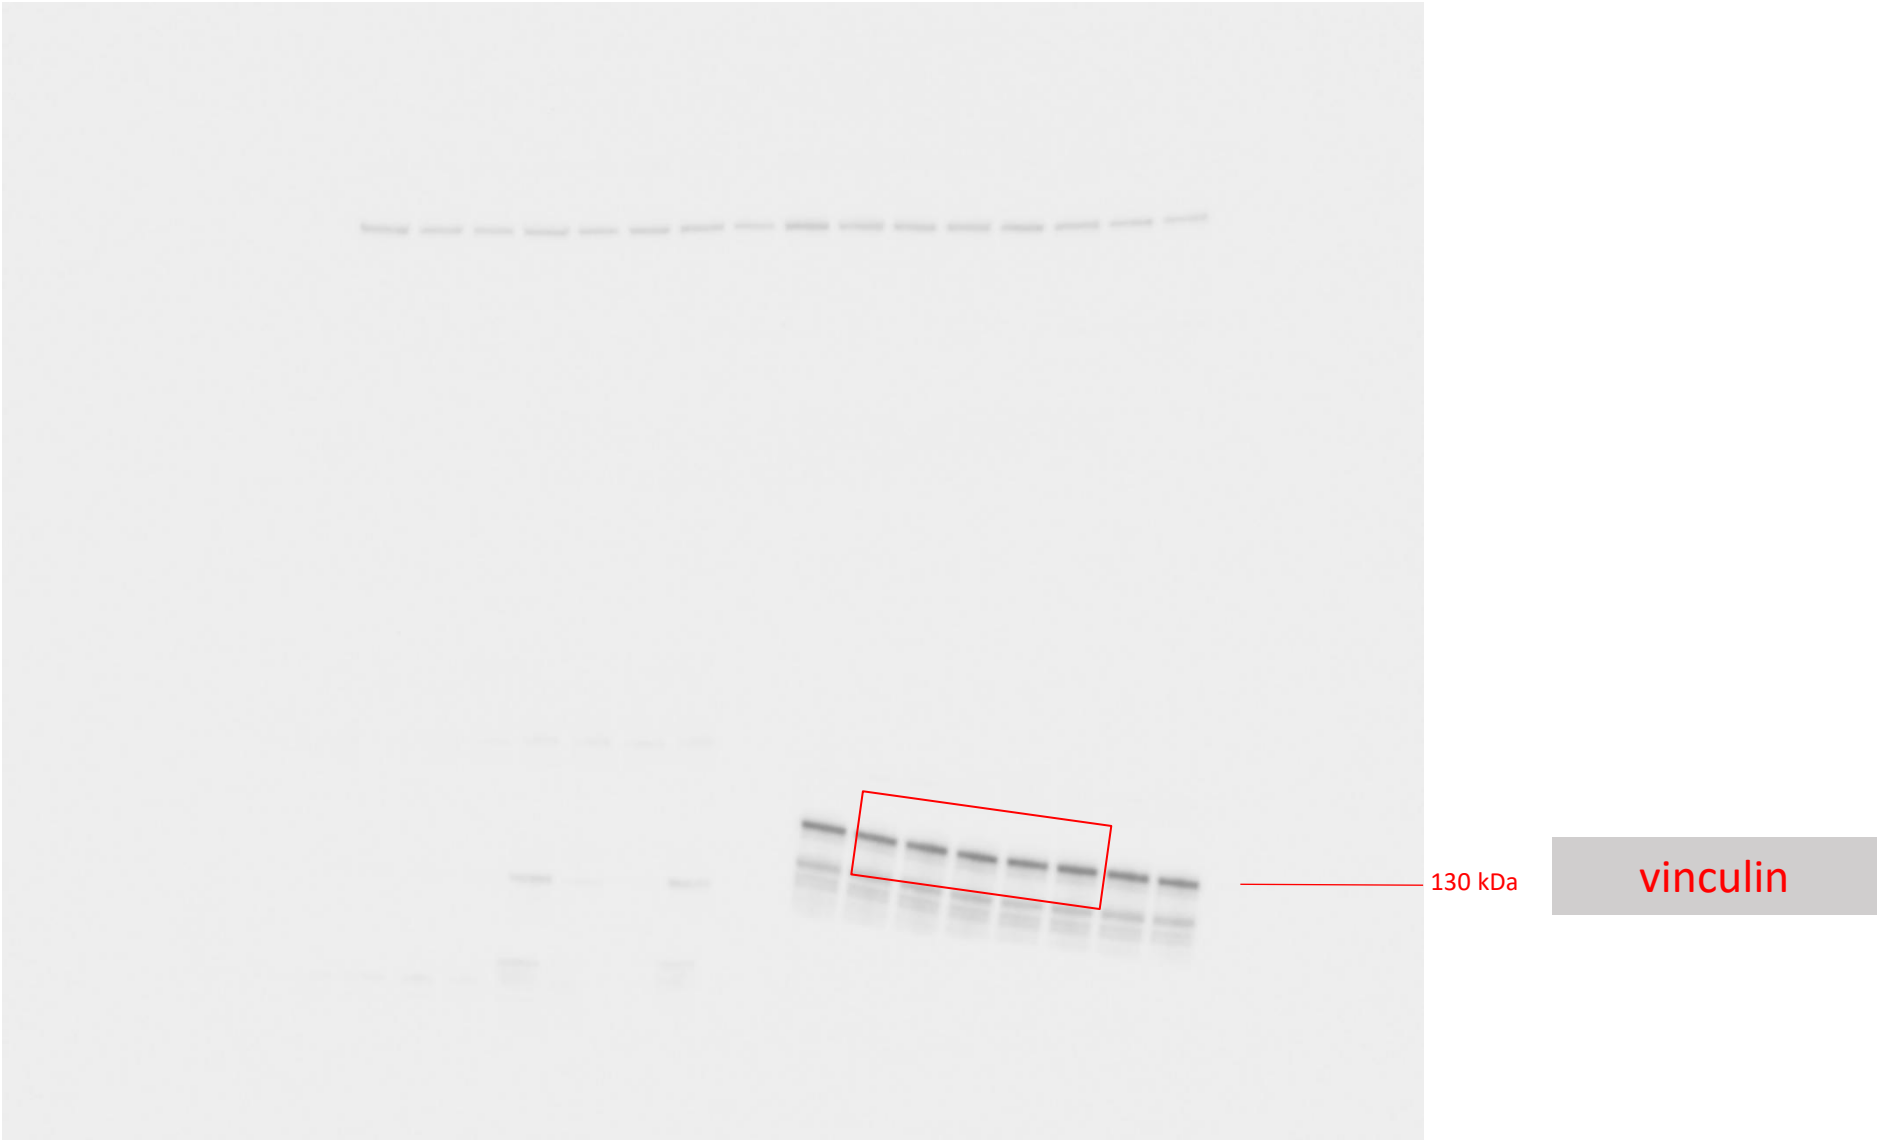

Supplement: fig2-figsupp3-data1 [file Figure 2-figure supplement 3B-Source Data 1.pdf › Figure 2-figure supplement 3A and 3B-Source Data 1/Figure 2-figure supplement 3B-Source Data 1.pdf]
