# Supplementary material for: TopBP1 biomolecular condensates as a new therapeutic target in advanced-stage colorectal cancer
Source: eLife journal article supplement (doi:10.7554/elife.106196), 2025-05-15

Figure 2-figure supplement 3A

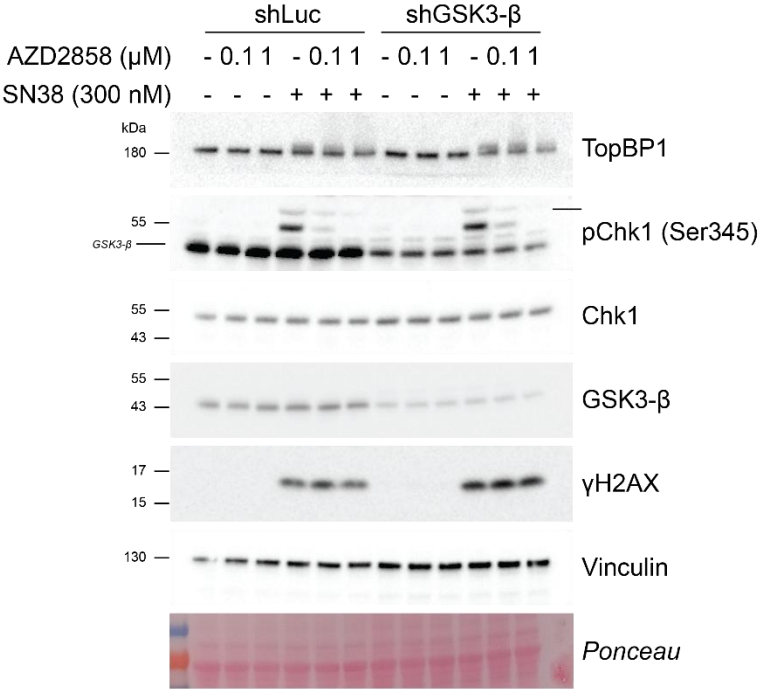

**Figure 2-figure supplement 3A:** Below are the Original membranes corresponding to Figure 2-figure supplement 3 Immunoblot of the indicated proteins after incubation of SW620 cells that express shLuc or shGSK-3 $\beta$  with AZD2858 (100 nM) or/and SN-38 (300 nM) for 2 h.

# Merge chemiluminescence bands/colorimetric for pChk1

pChk1(S345)

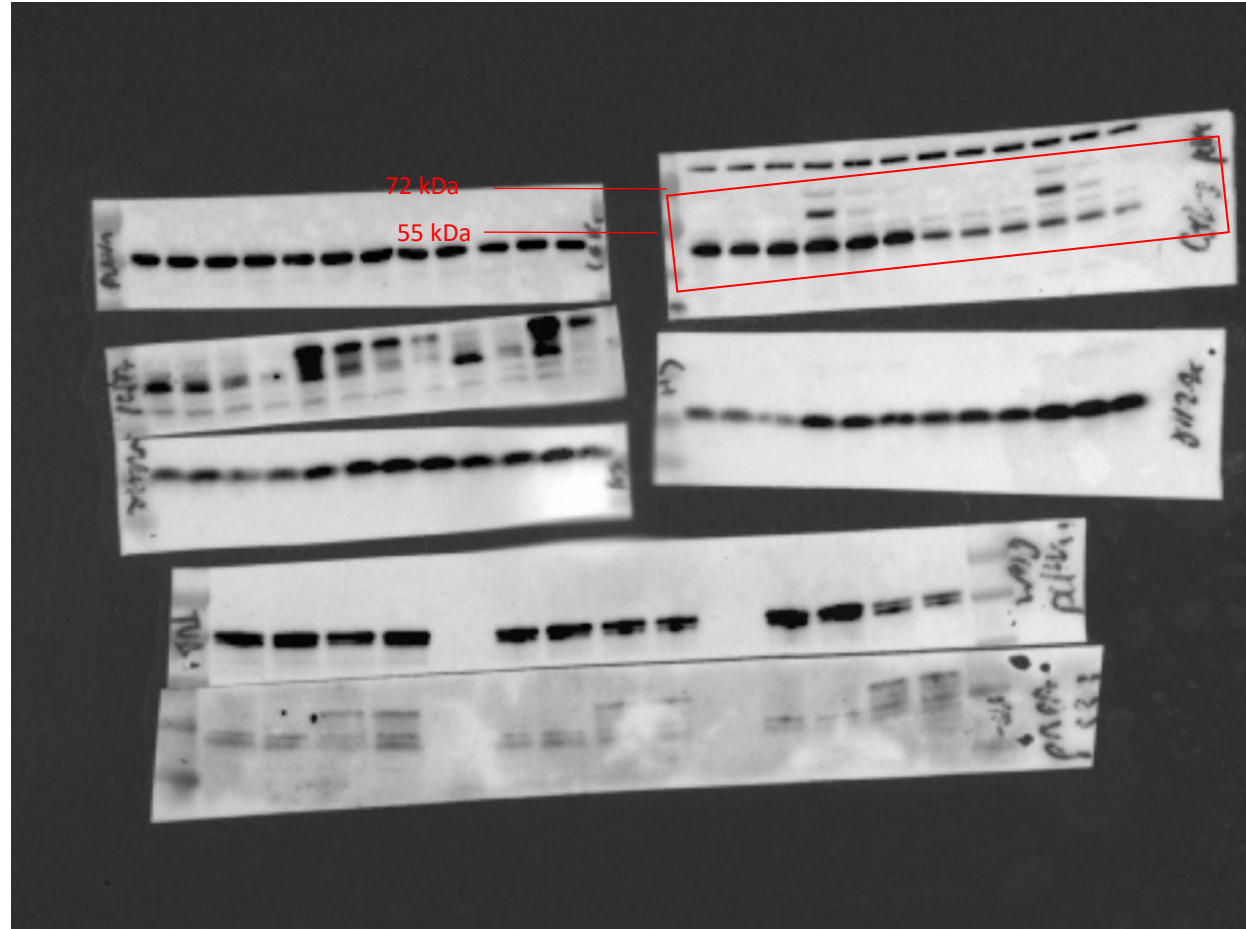

## Chemiluminescence bands for pChk1

pChk1(S345)

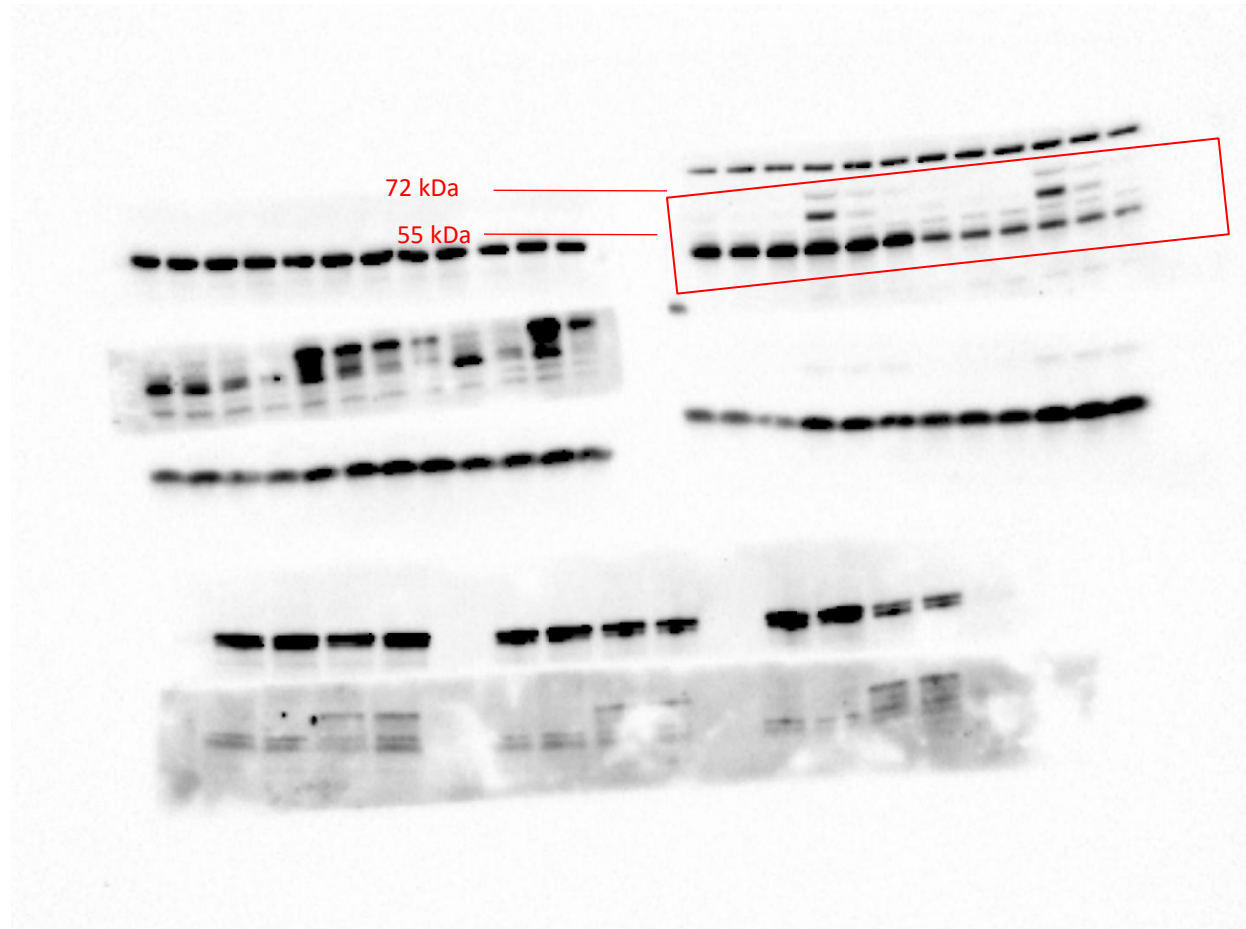

## Colorimetric for pChk1

pChk1(S345)

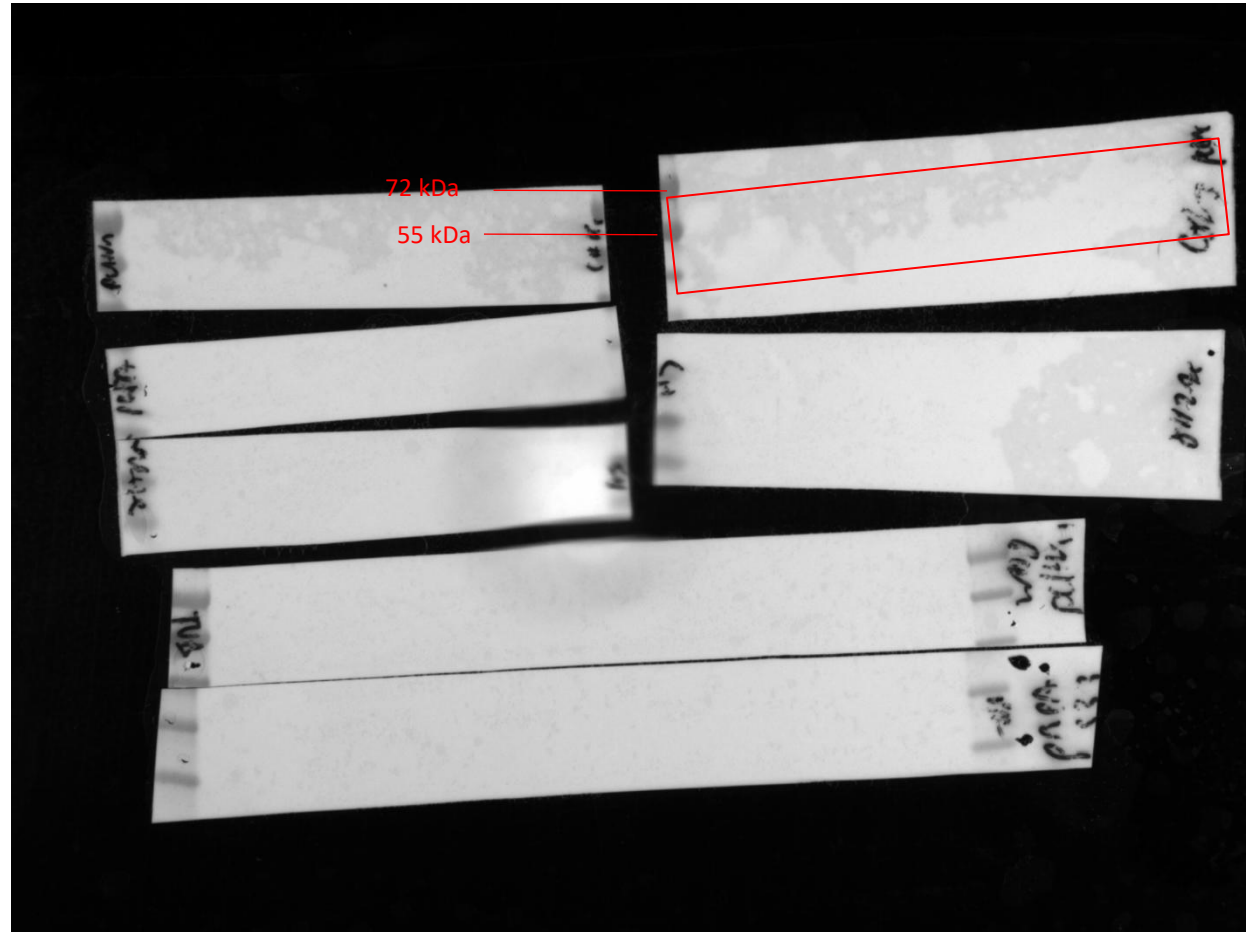

Merge chemiluminescence bands/colorimetric for Chk1

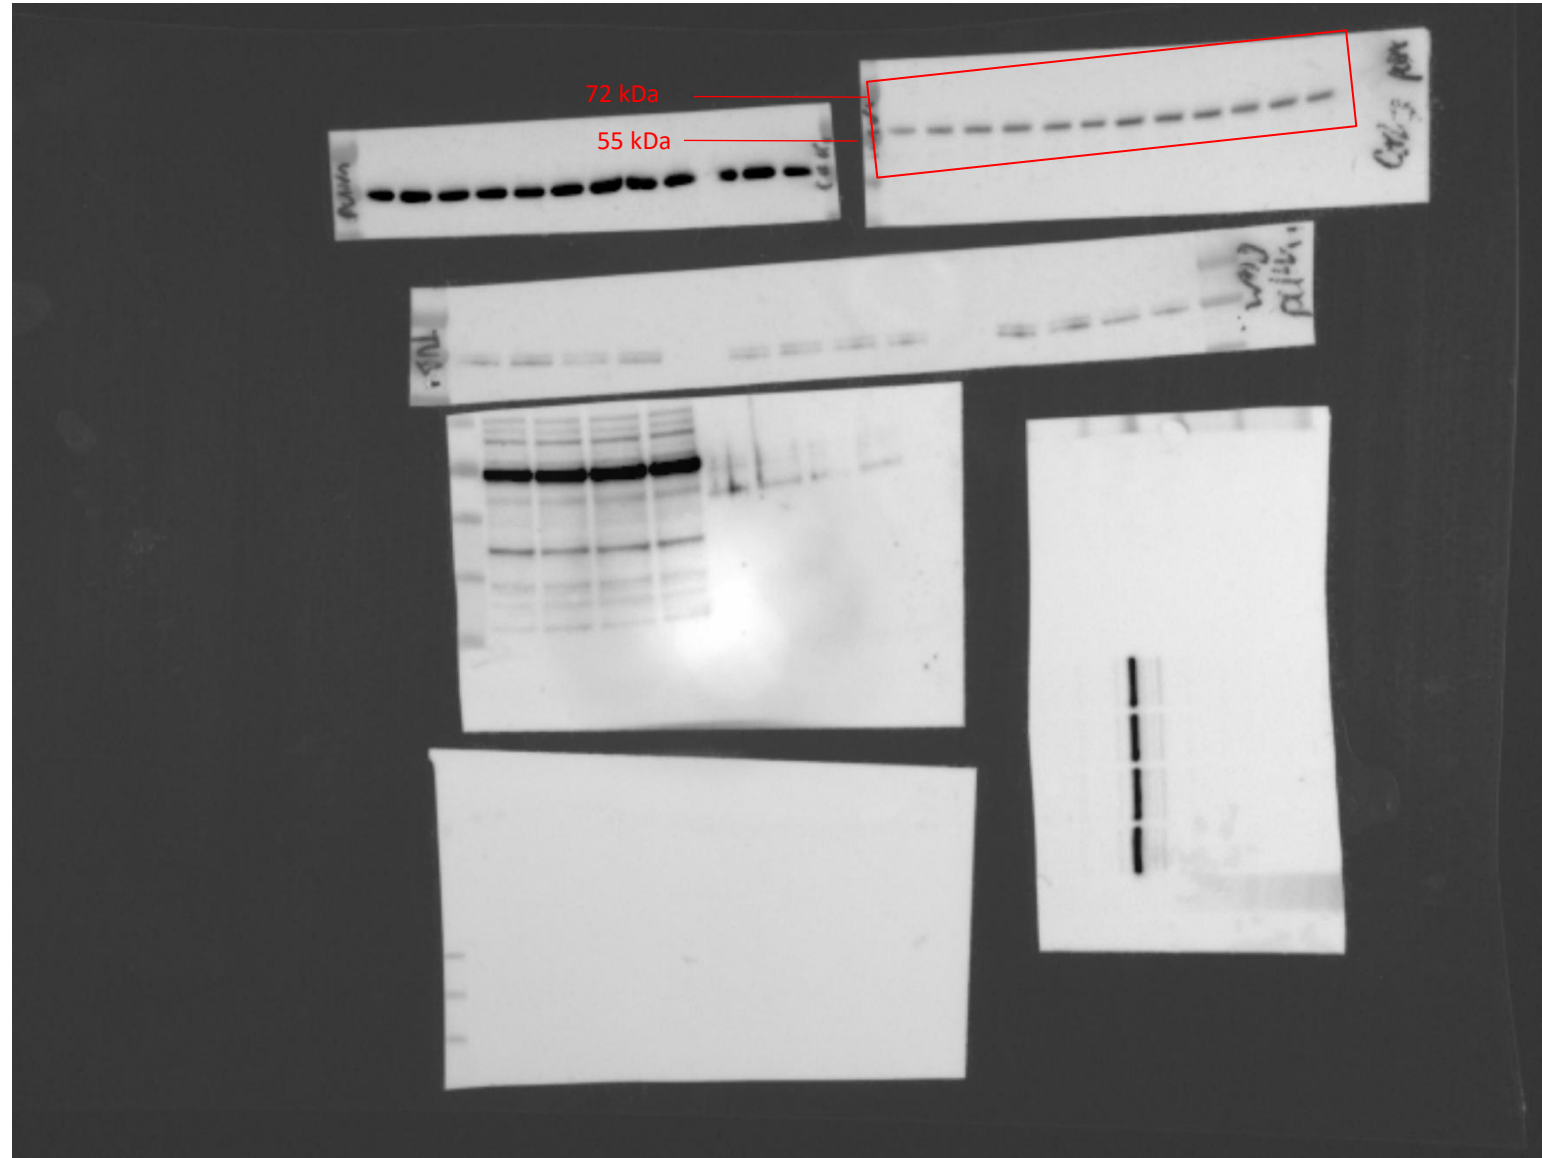

Chk1

## chemiluminescence for Chk1

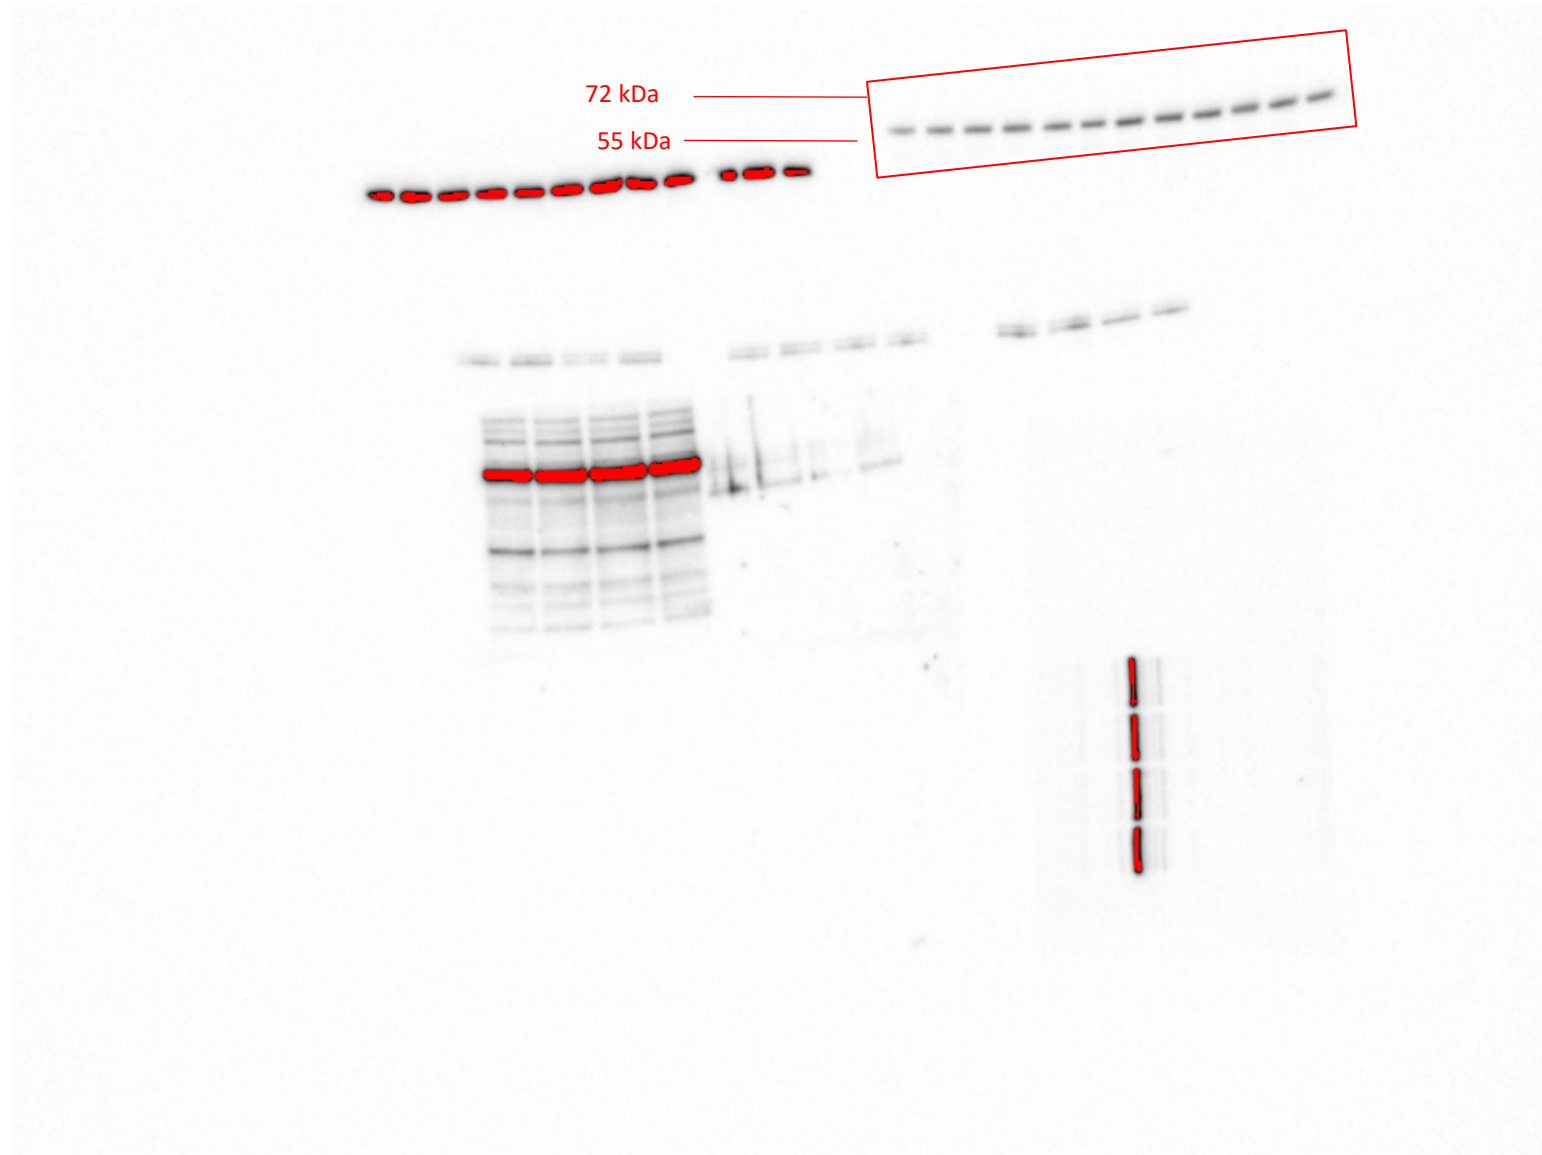

Chk1

Merge chemiluminescence bands/colorimetric for Chk1

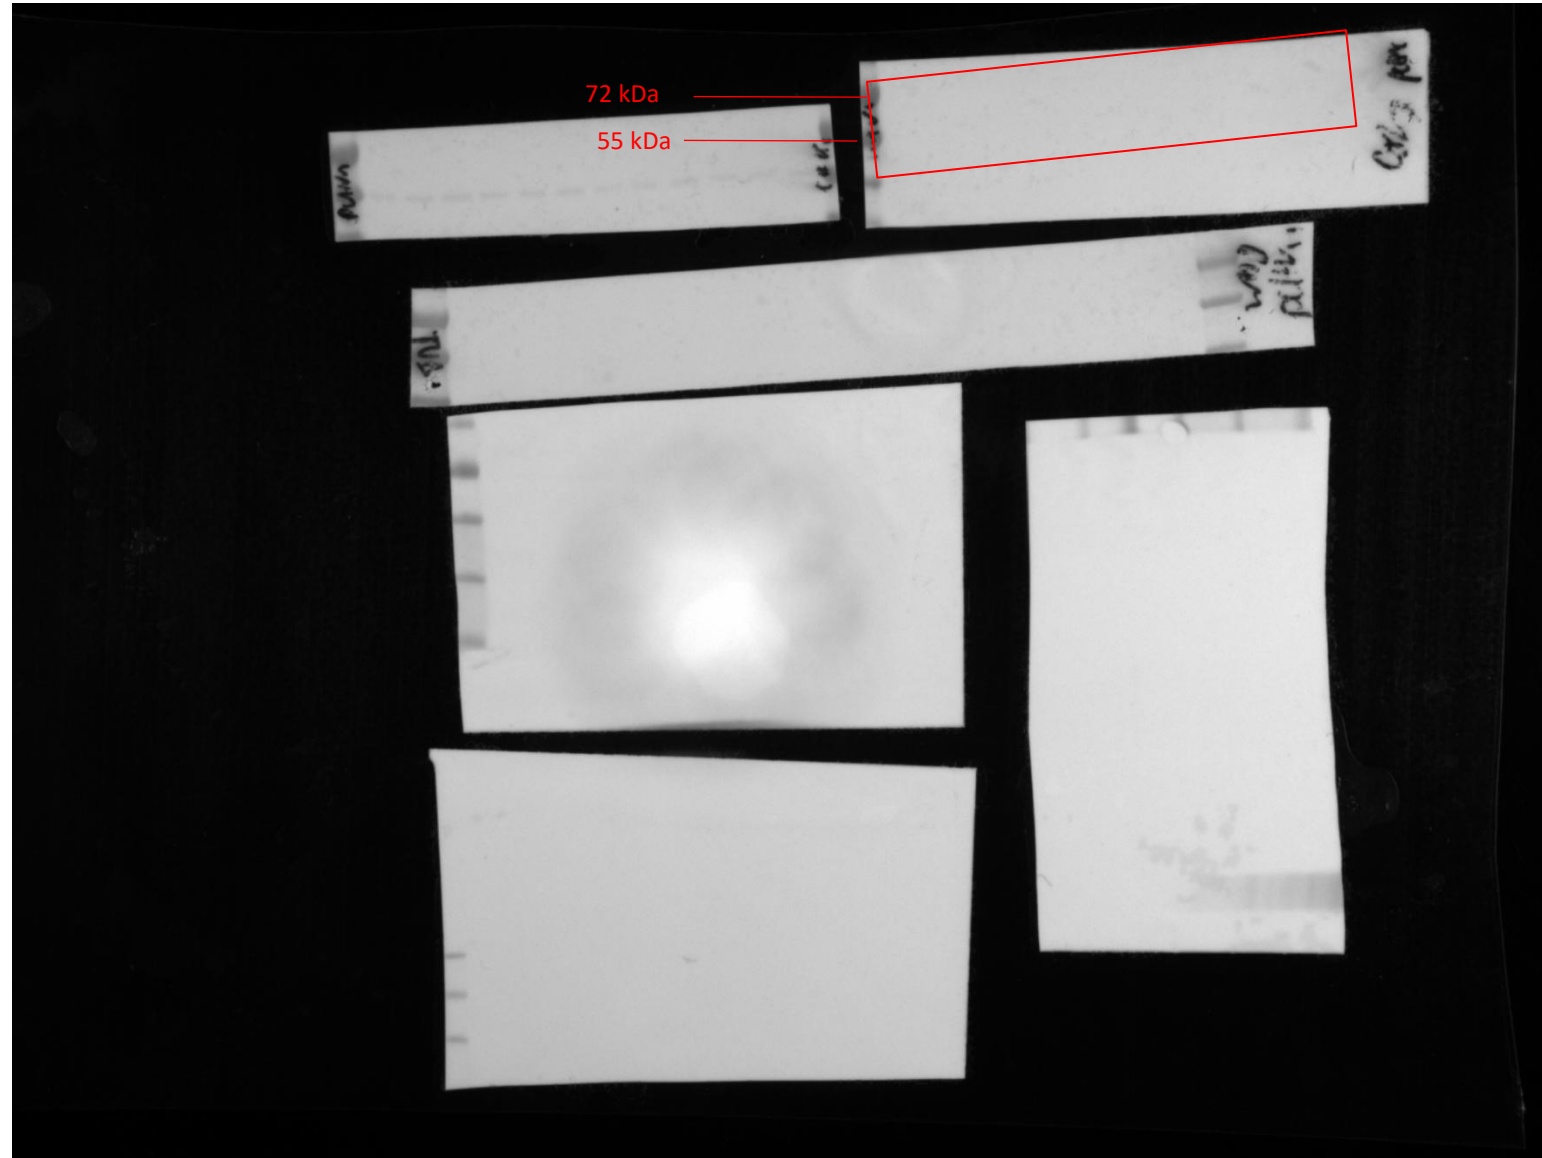

Chk1

Merge chemiluminescence bands/colorimetric for TopBP1

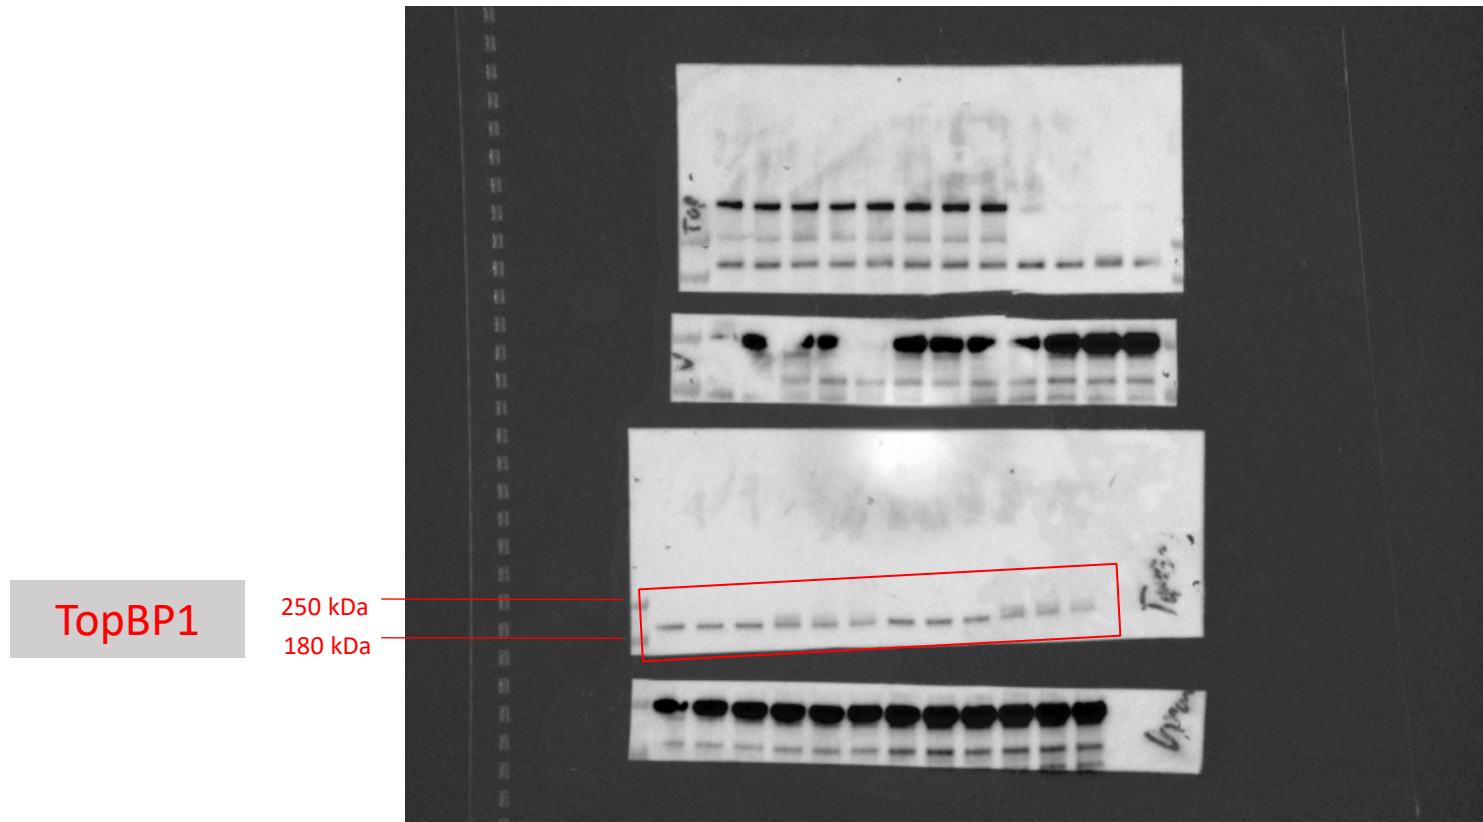

## Chemiluminescence bands for TopBP1

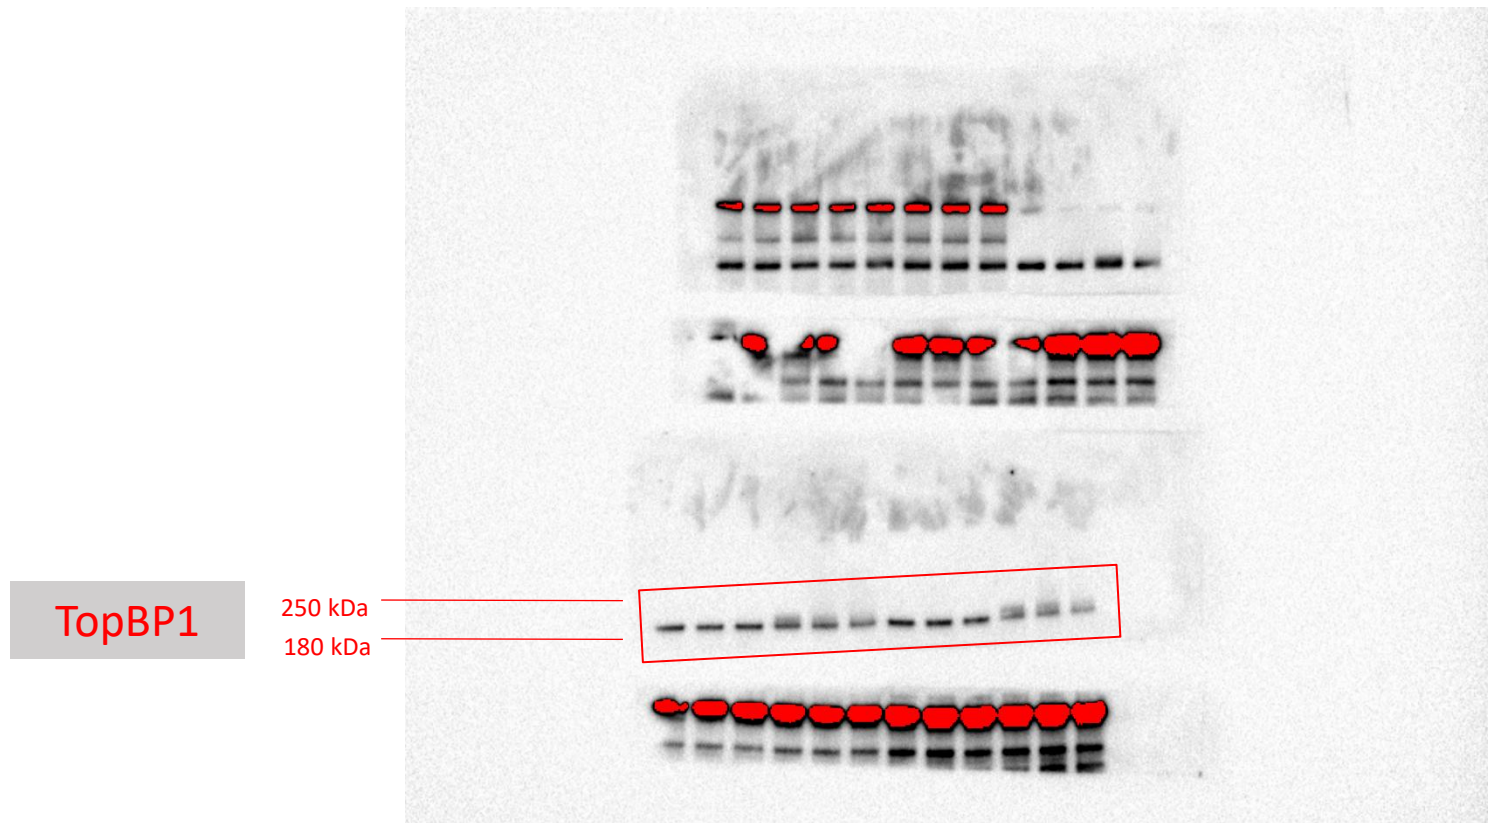

Merge chemiluminescence bands/colorimetric for vinculin

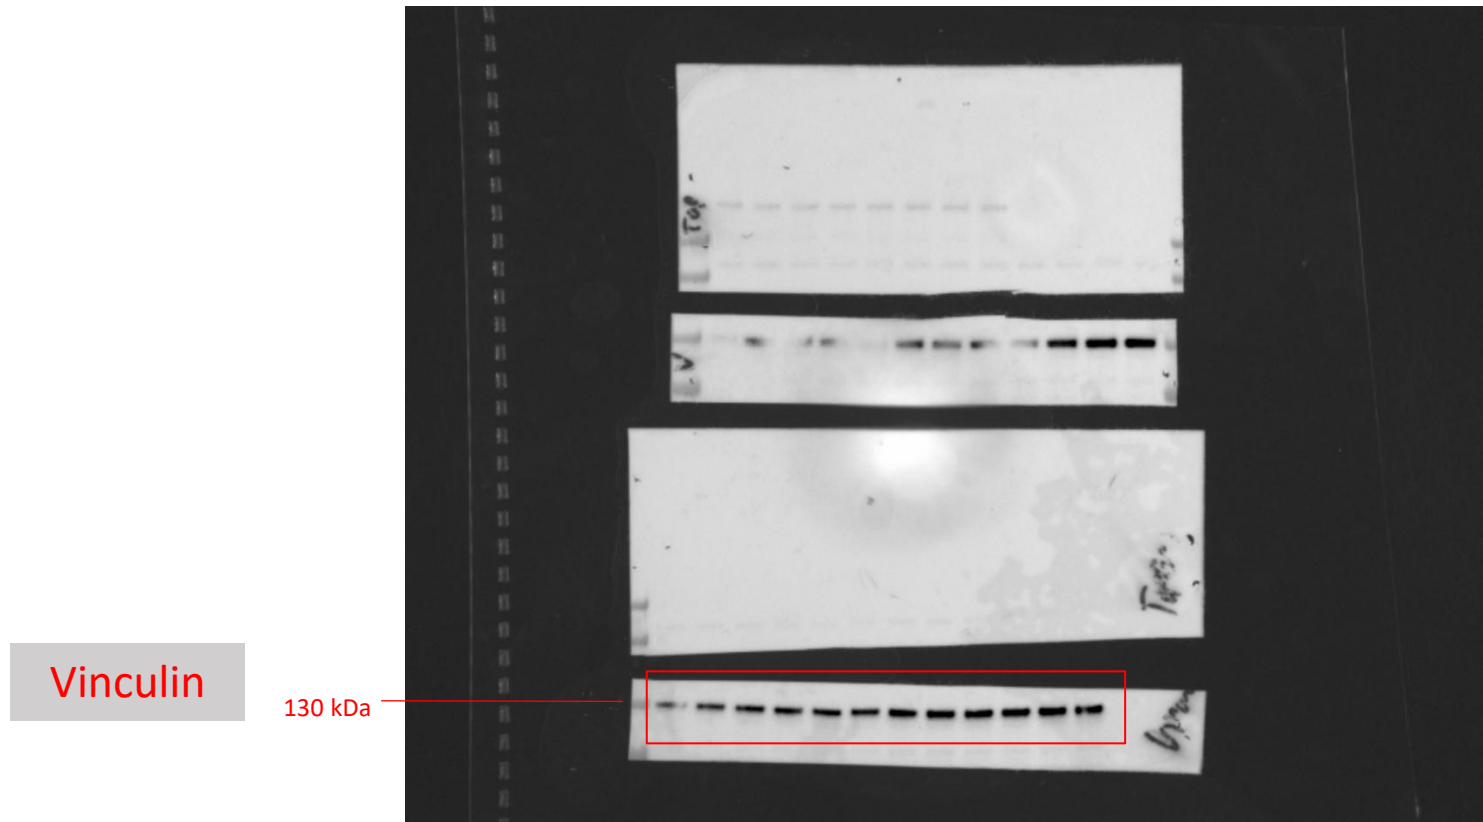

Chemiluminescence bands for vinculin

Vinculin

130 kDa

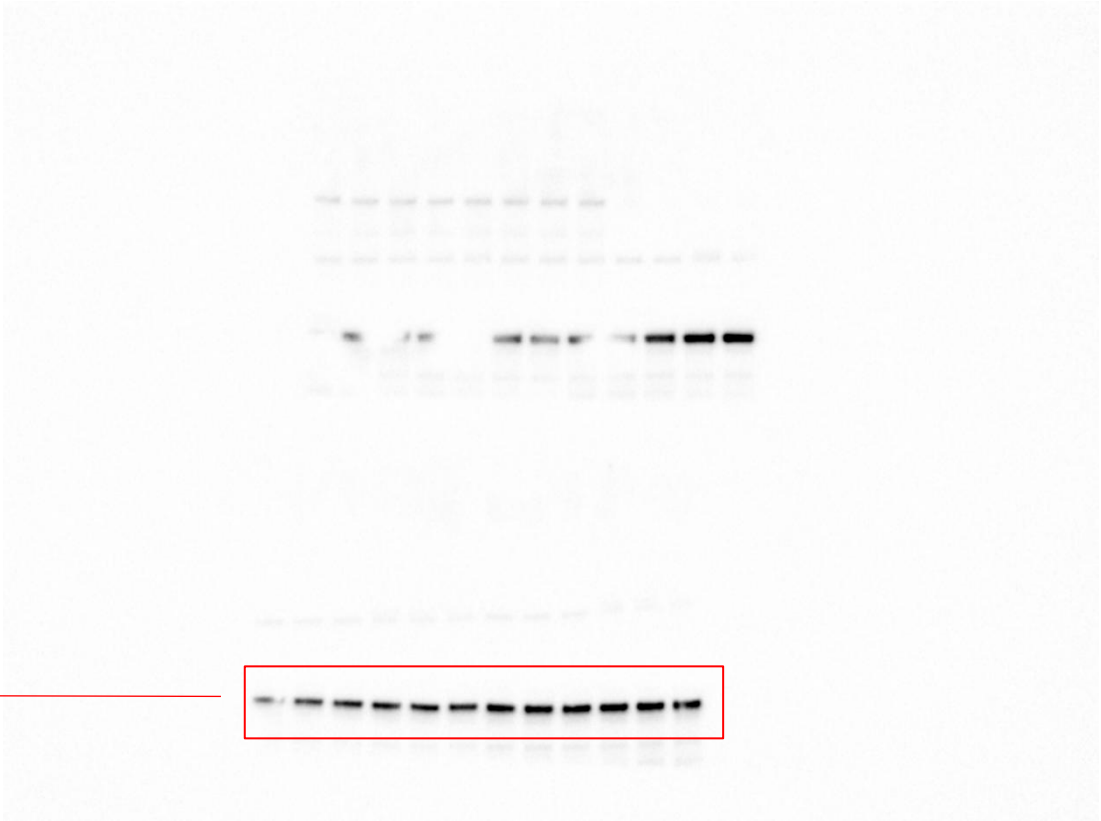

## Colorimetric for TopBP1 & vincu

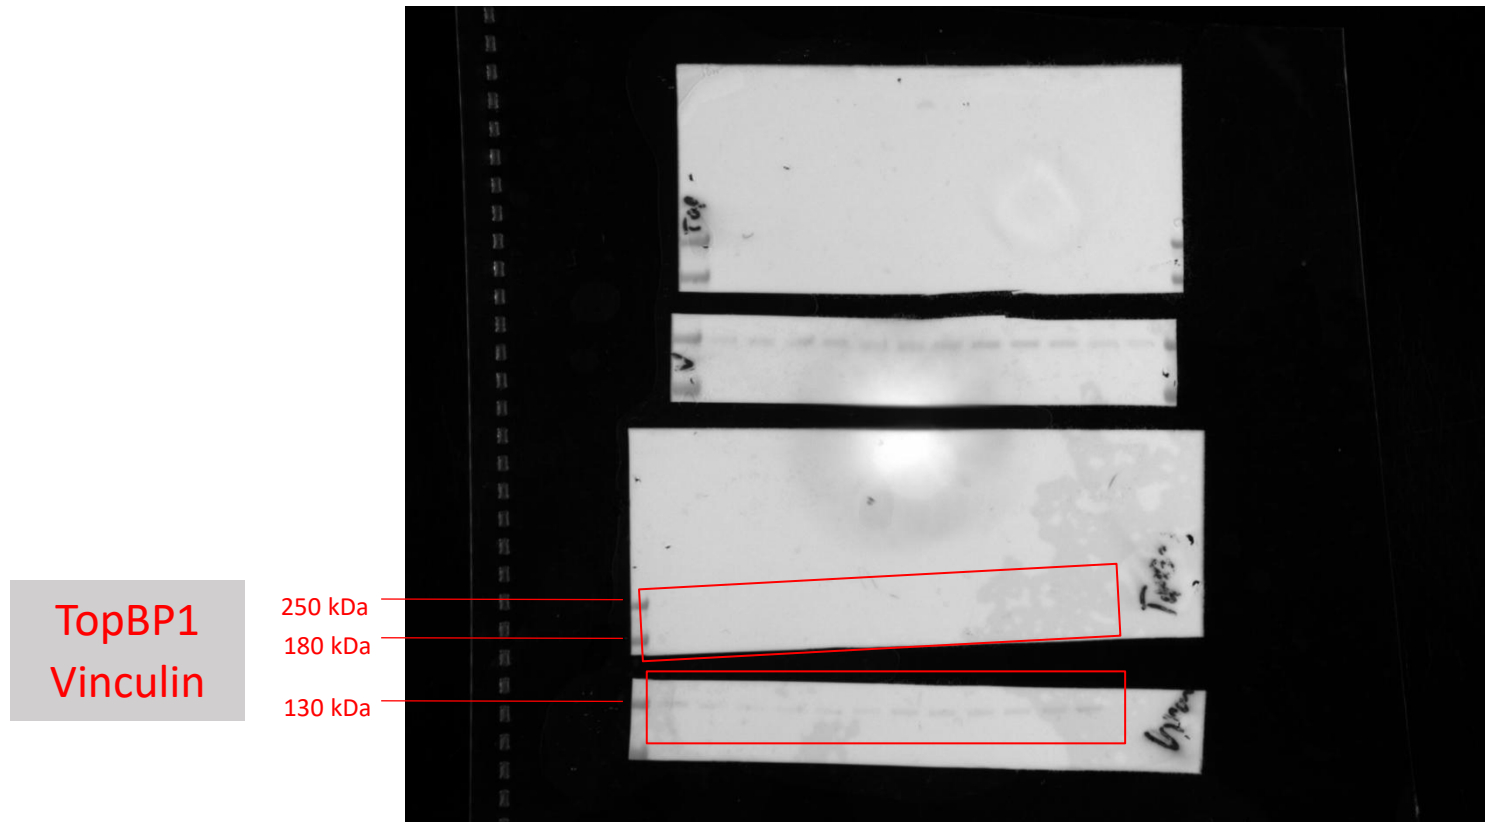

Merge chemiluminescence bands/colorimetric for GSK3-b

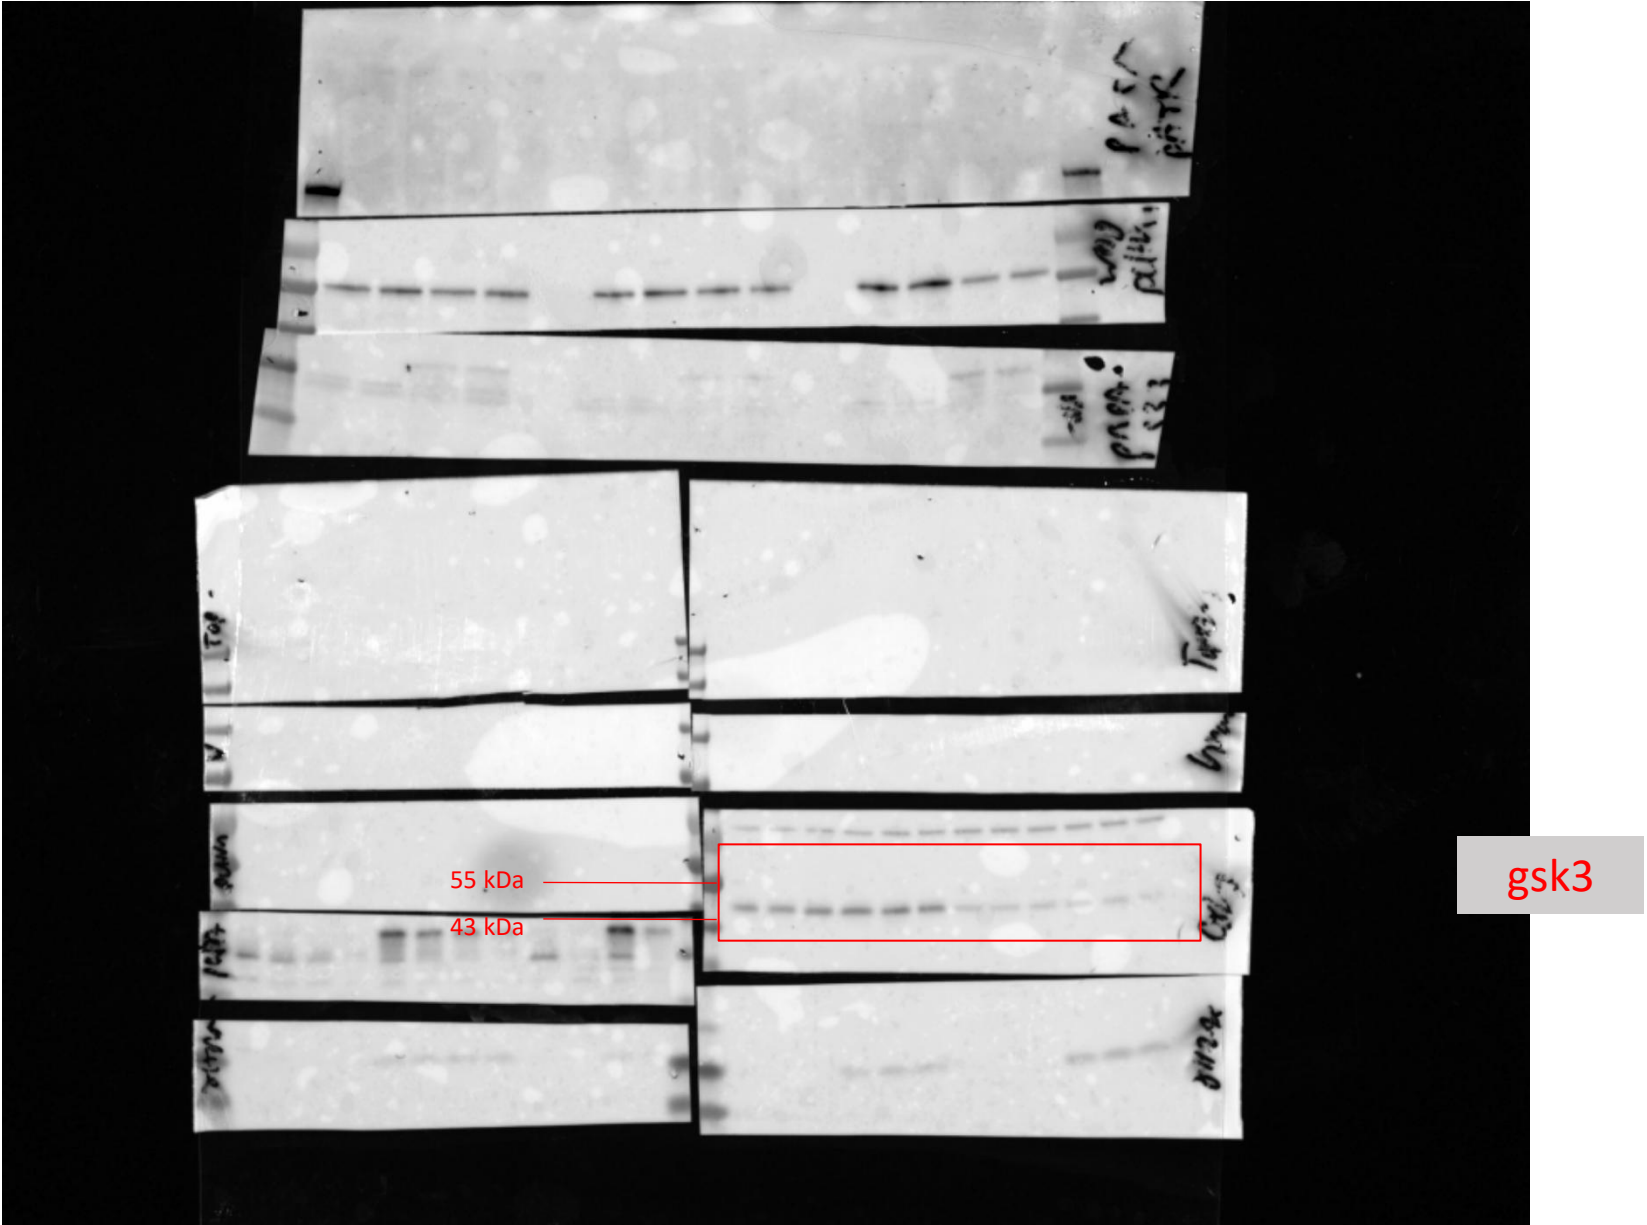

chemiluminescence for GSK3-b

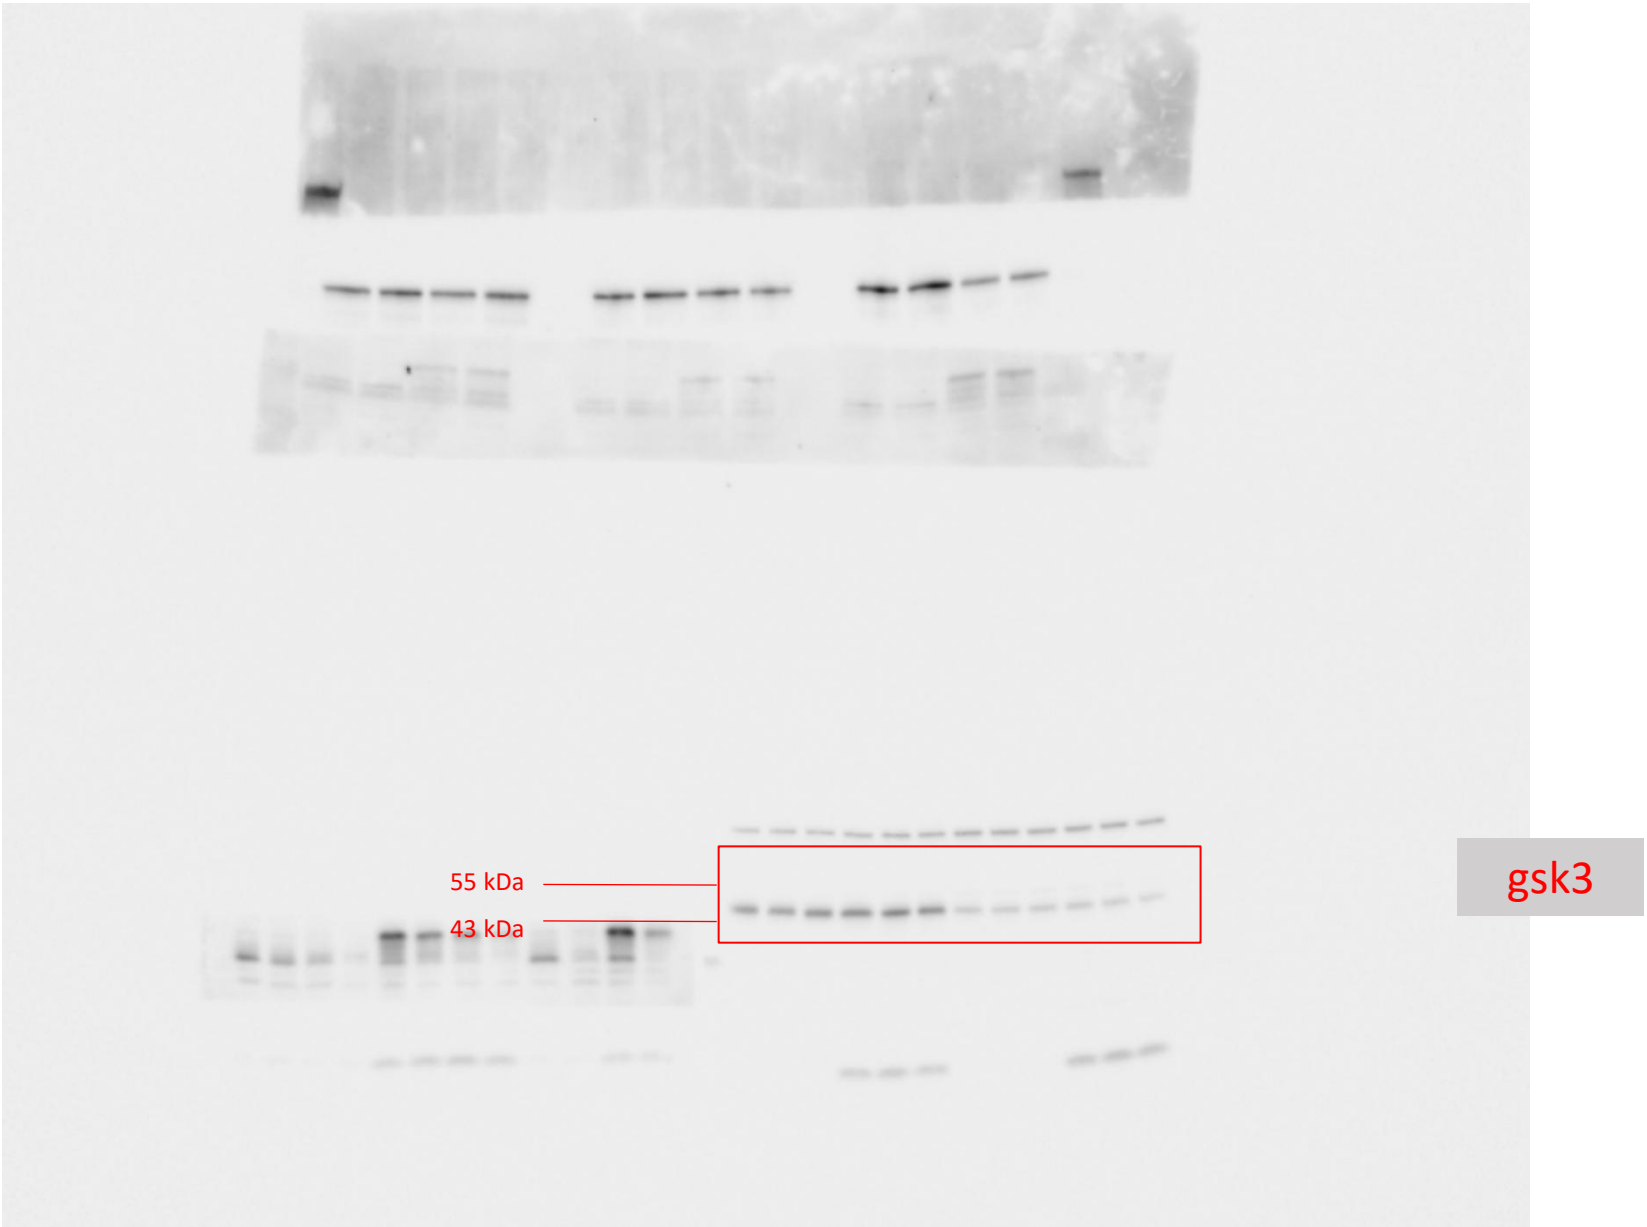

Merge chemiluminescence bands/colorimetric for gH2AX

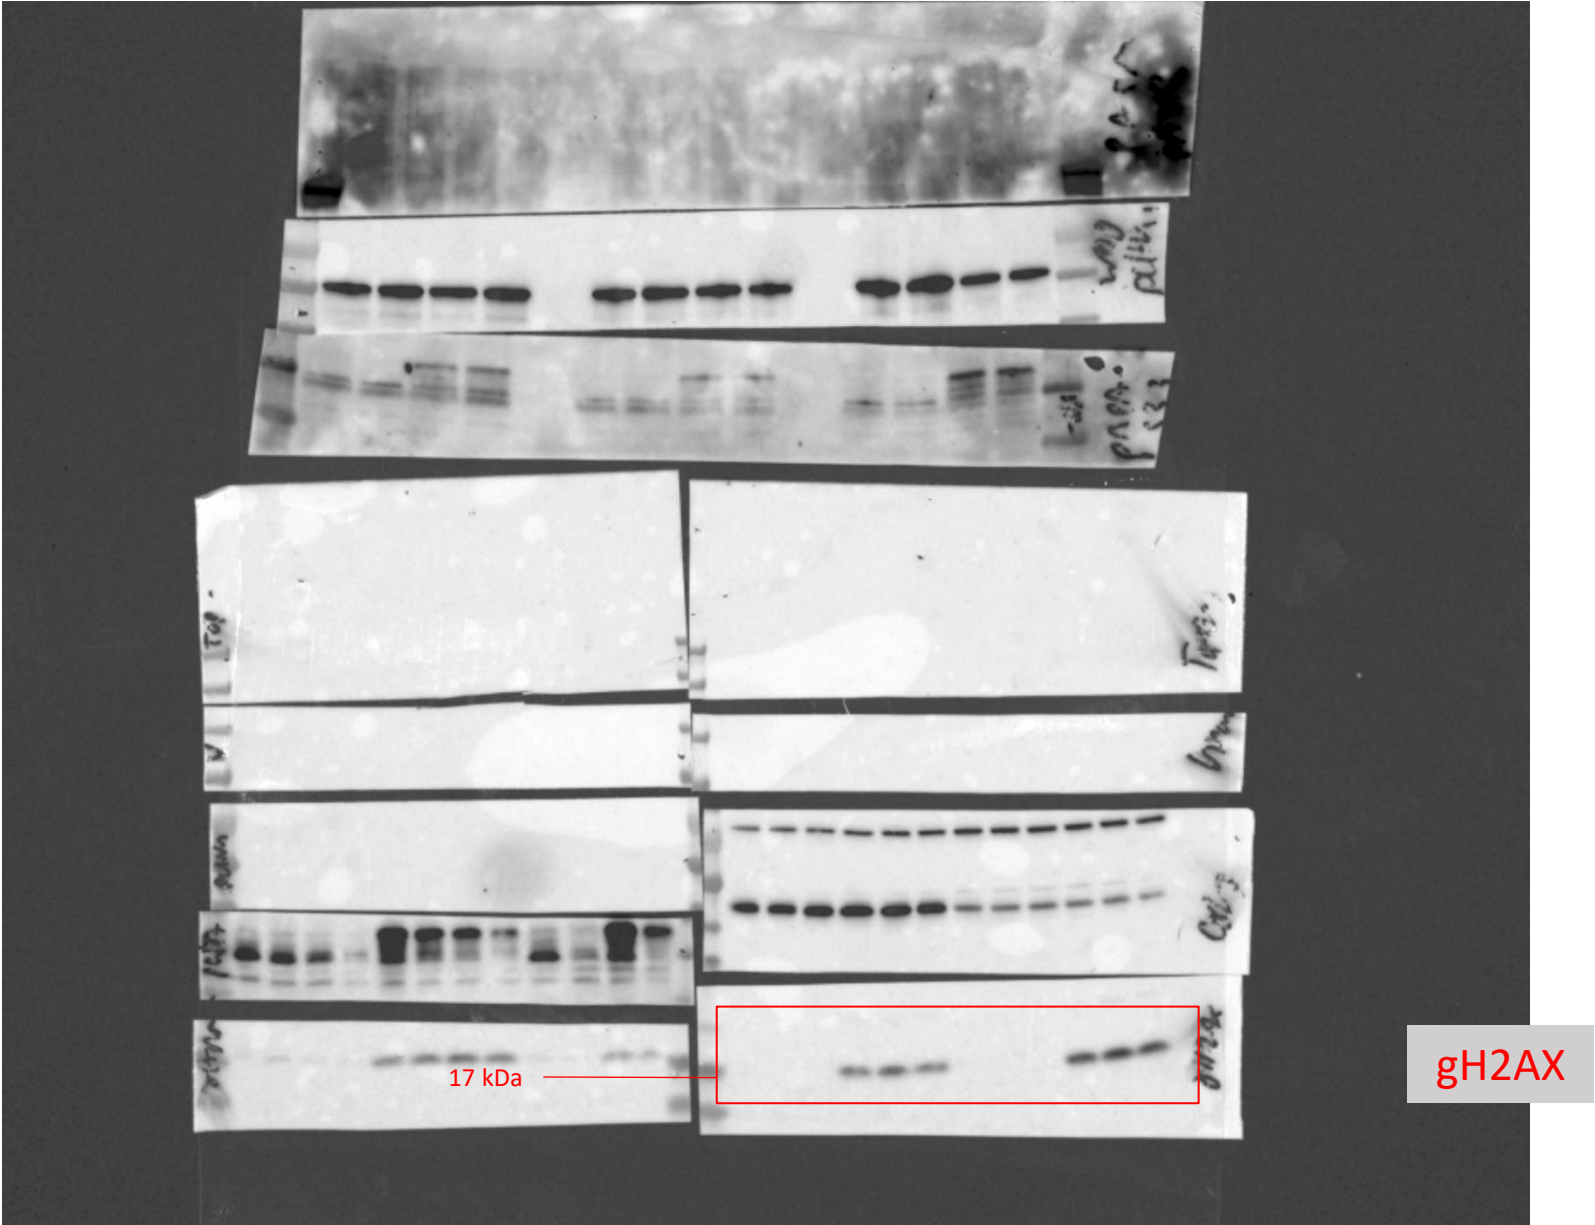

chemiluminescence for gH2AX

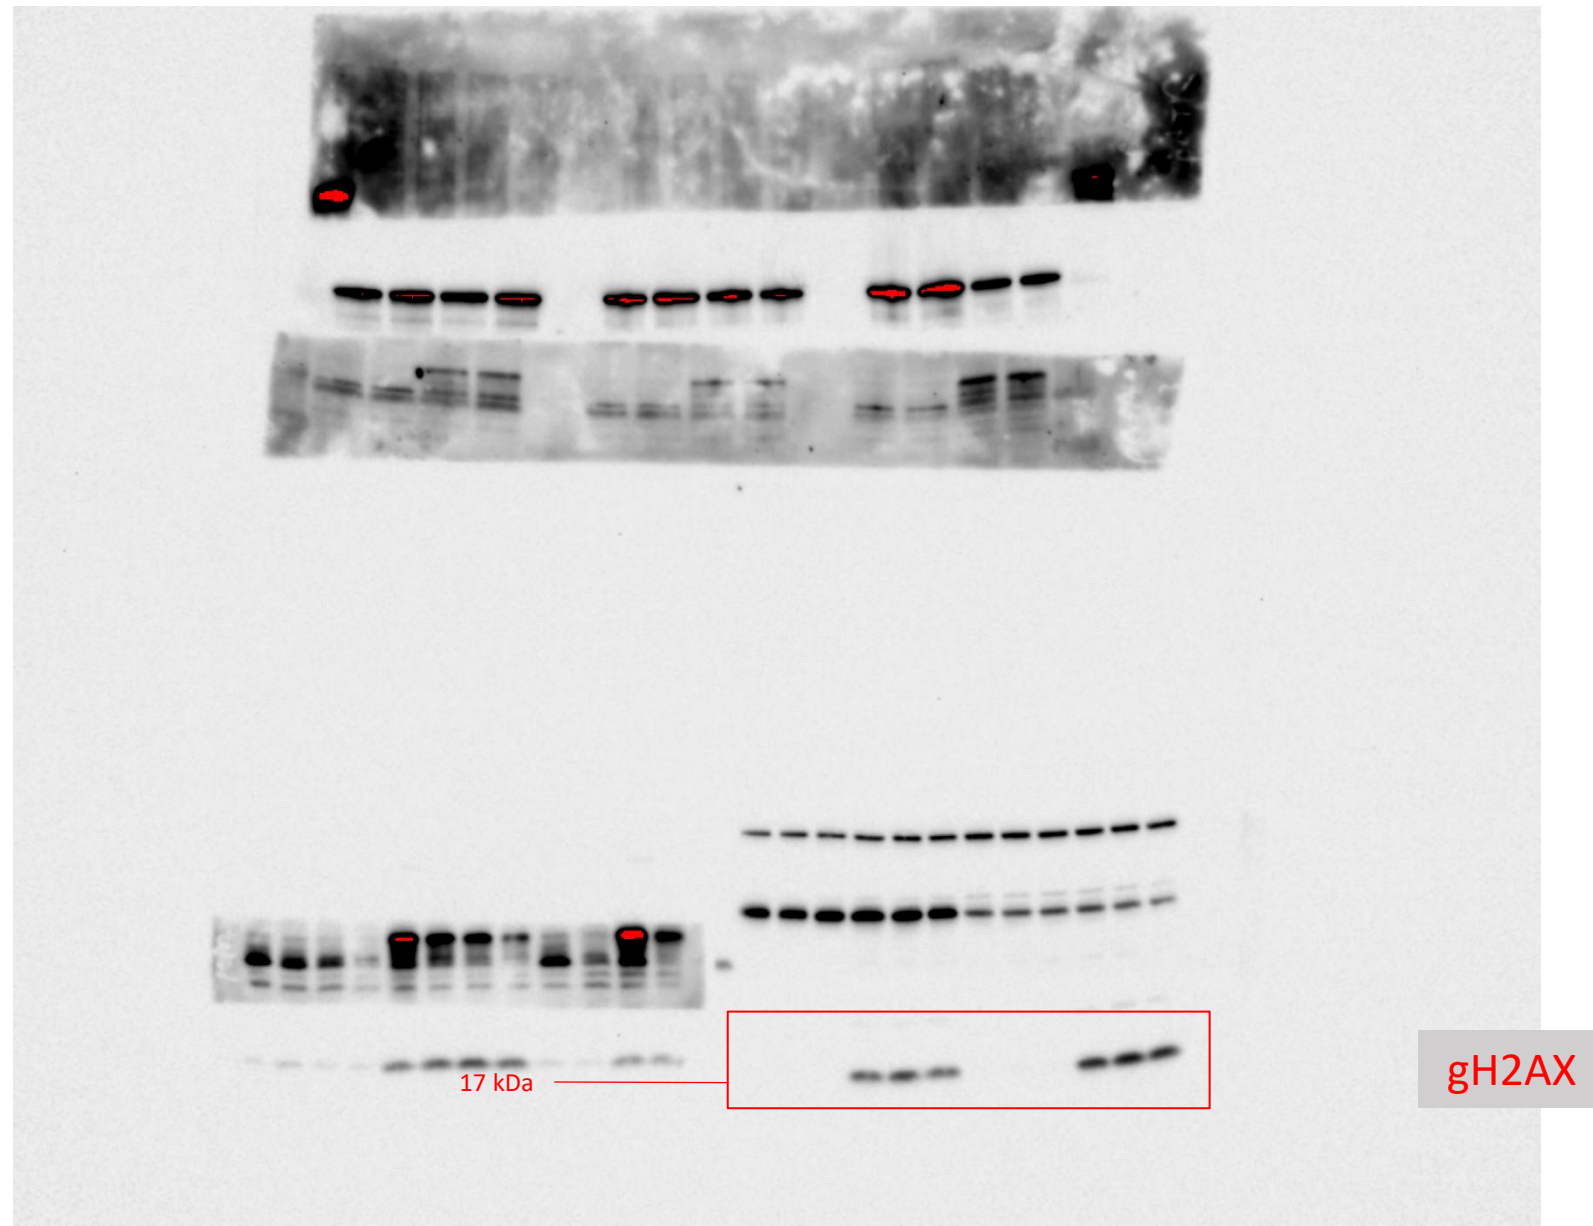

Merge chemiluminescence bands/colorimetric for GSK3-b+gH2AX

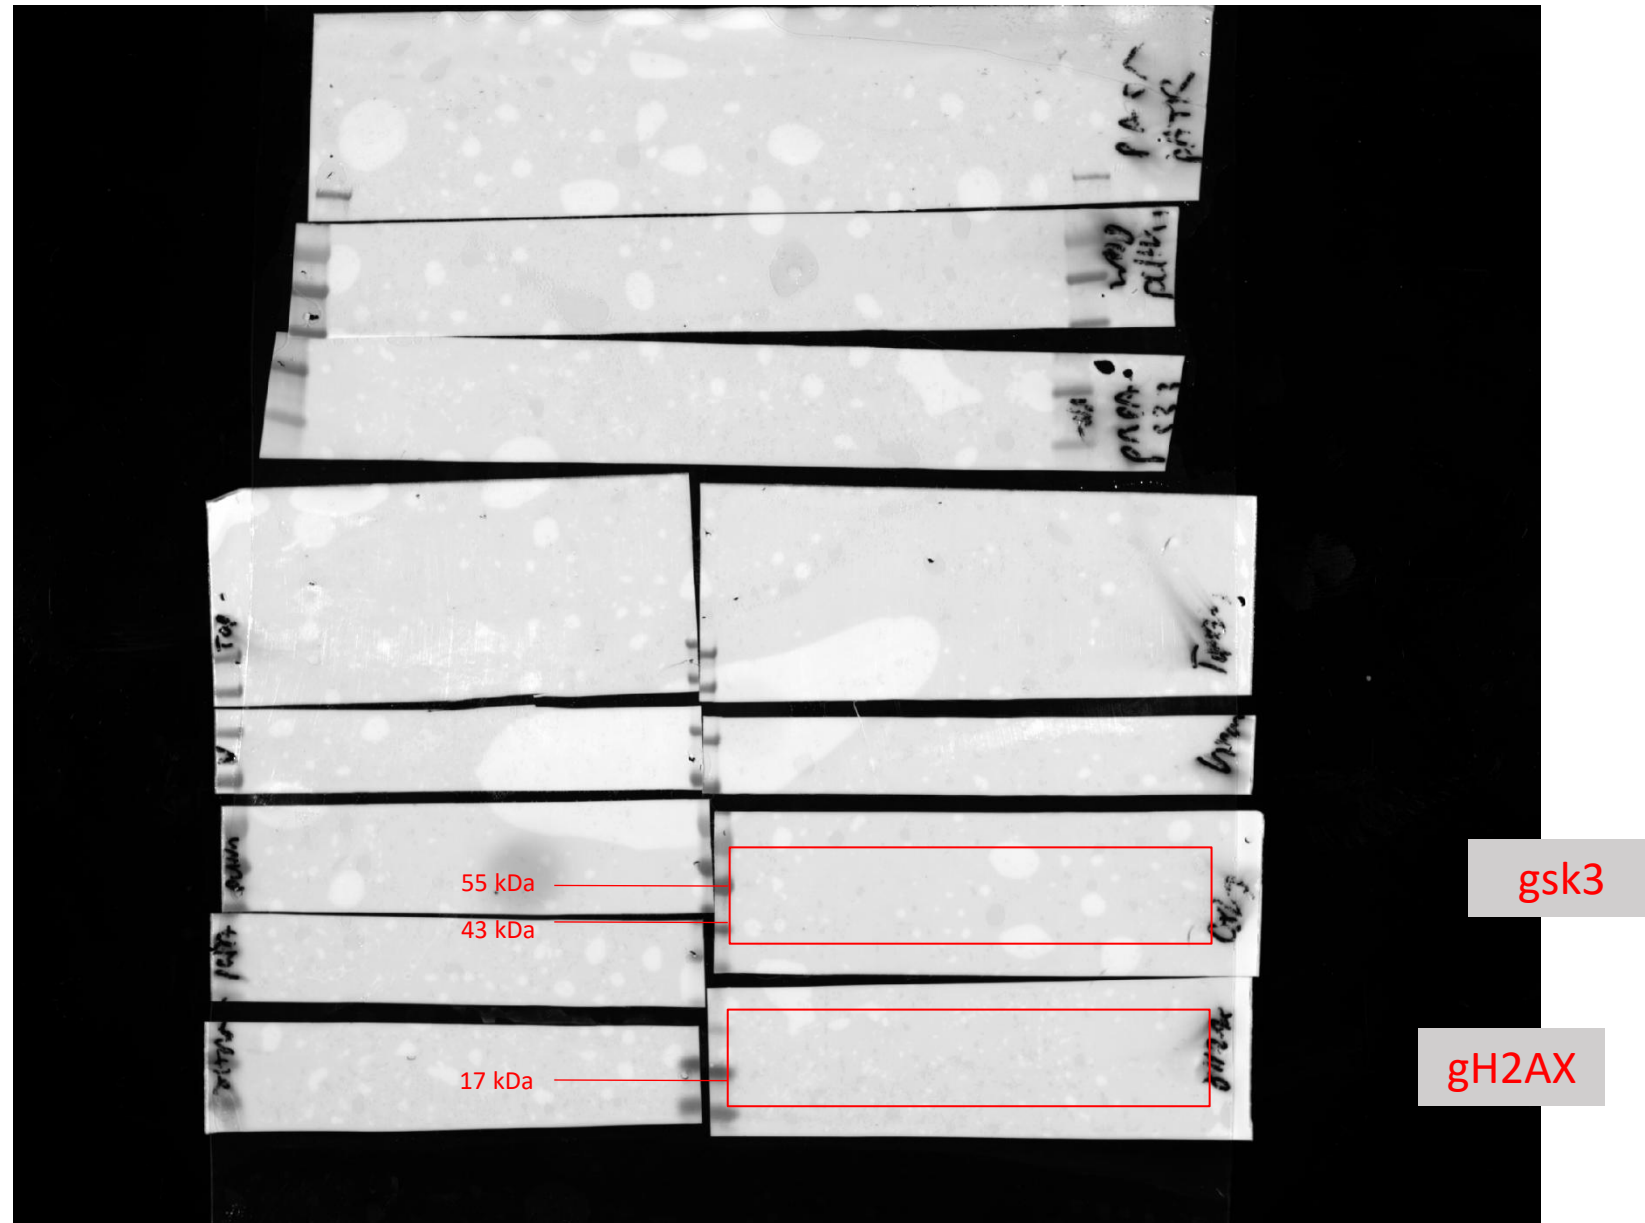

Supplement: fig2-figsupp3-data1 [file Figure 2-figure supplement 3A-Source Data 1.pdf › Figure 2-figure supplement 3A and 3B-Source Data 1/Figure 2-figure supplement 3A-Source Data 1.pdf]
