# Supplementary material for: TopBP1 biomolecular condensates as a new therapeutic target in advanced-stage colorectal cancer
Source: eLife journal article supplement (doi:10.7554/elife.106196), 2025-05-15

**Figure 3.E**

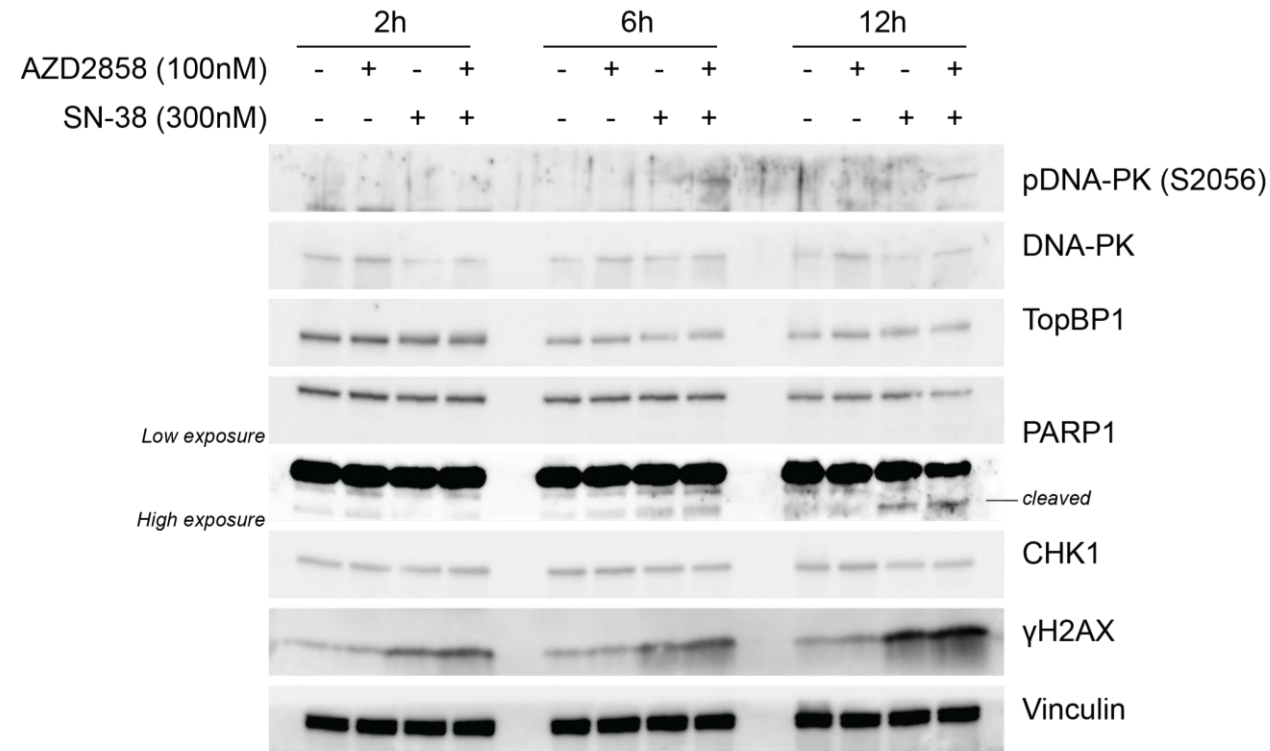

**Figure 3E, Source Data 1.** Below are the Original membranes corresponding to Figure 3E Immunoblot of the indicated proteins after incubation with AZD2858 (100 nM) or/and SN-38 (300 nM) for the indicated times. The experiment was replicated 3 times, and a representative replicate is shown.

Merge chemiluminescence bands/colorimetric for DNA-PK

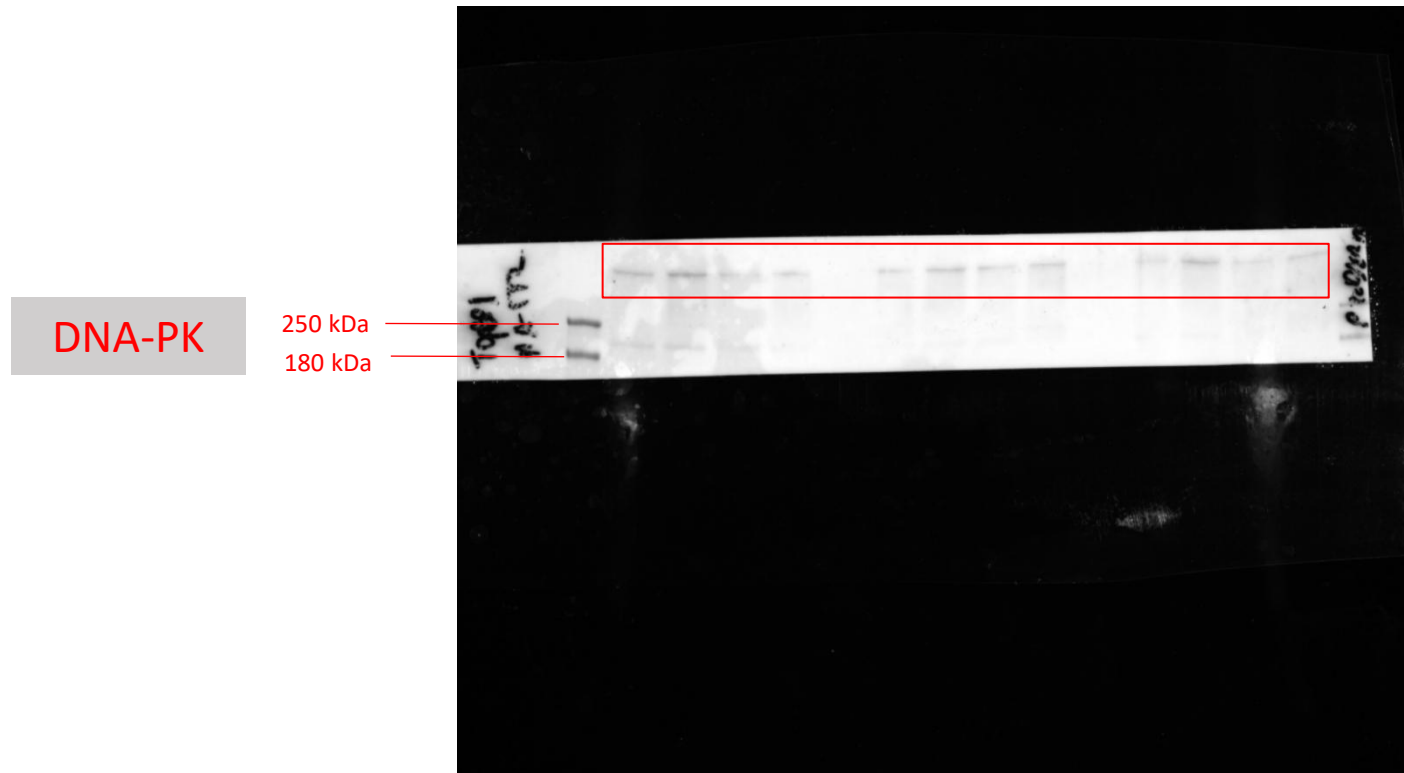

Chemiluminescence bands for DNA-PK

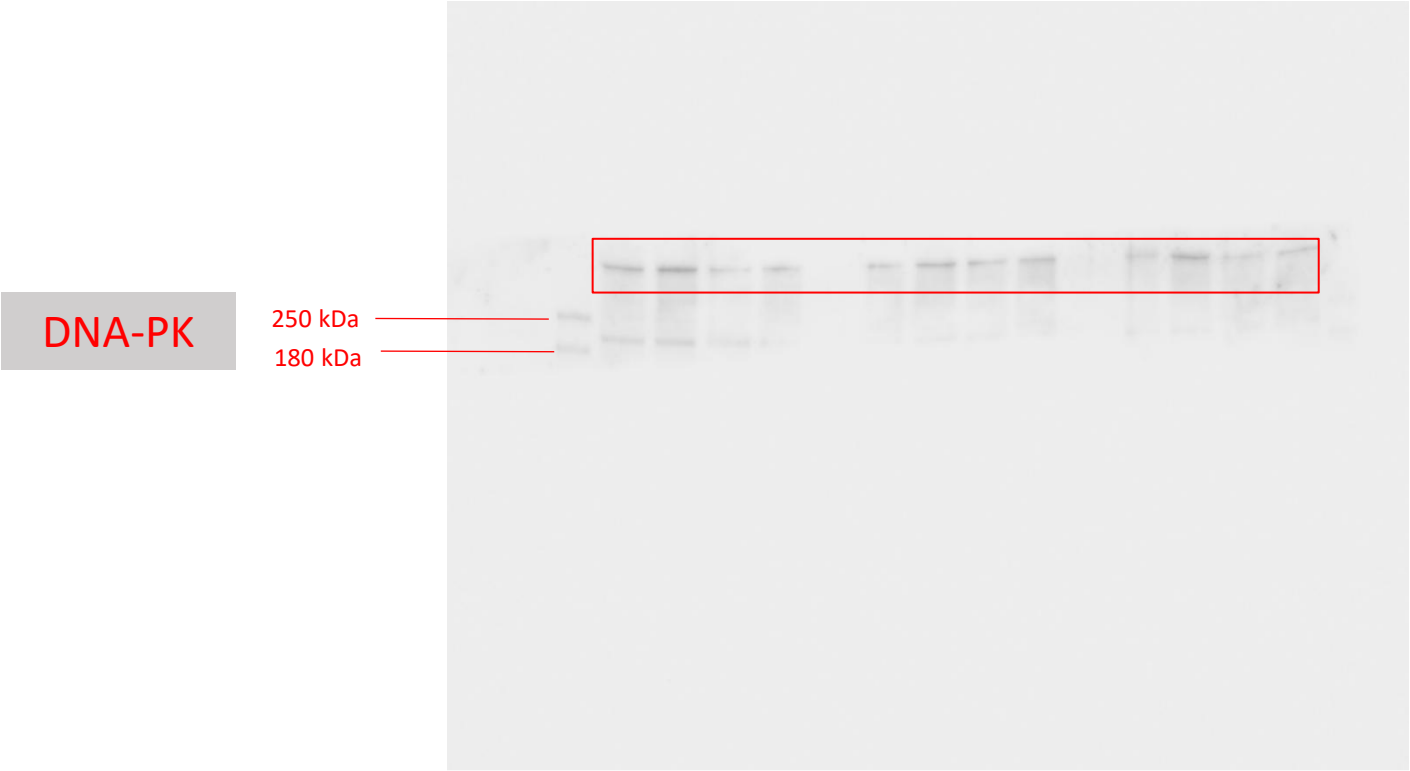

## Colorimetric for DNA-PK

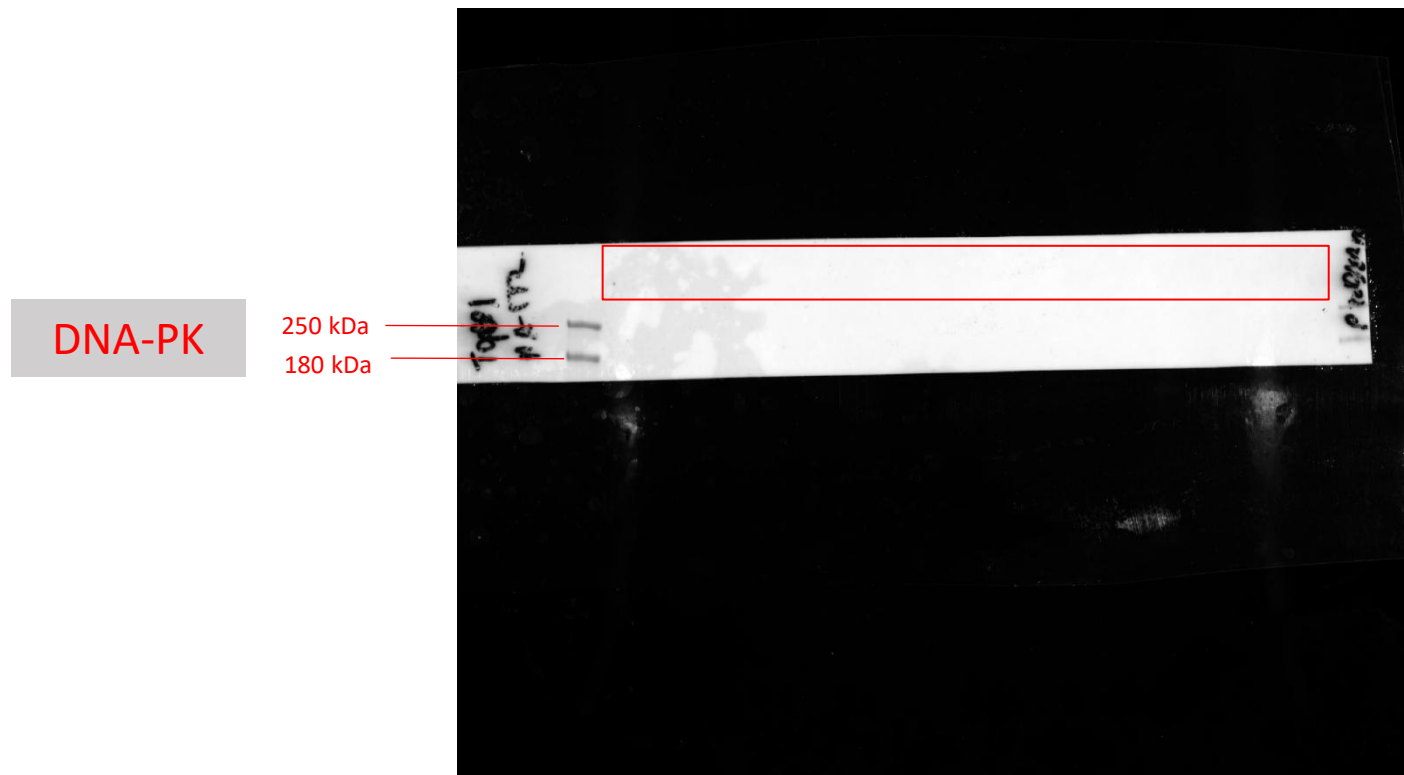

Merge chemiluminescence bands/colorimetric for pDNAPK

pDNA-PK  
(S2056)

250 kDa  
180 kDa

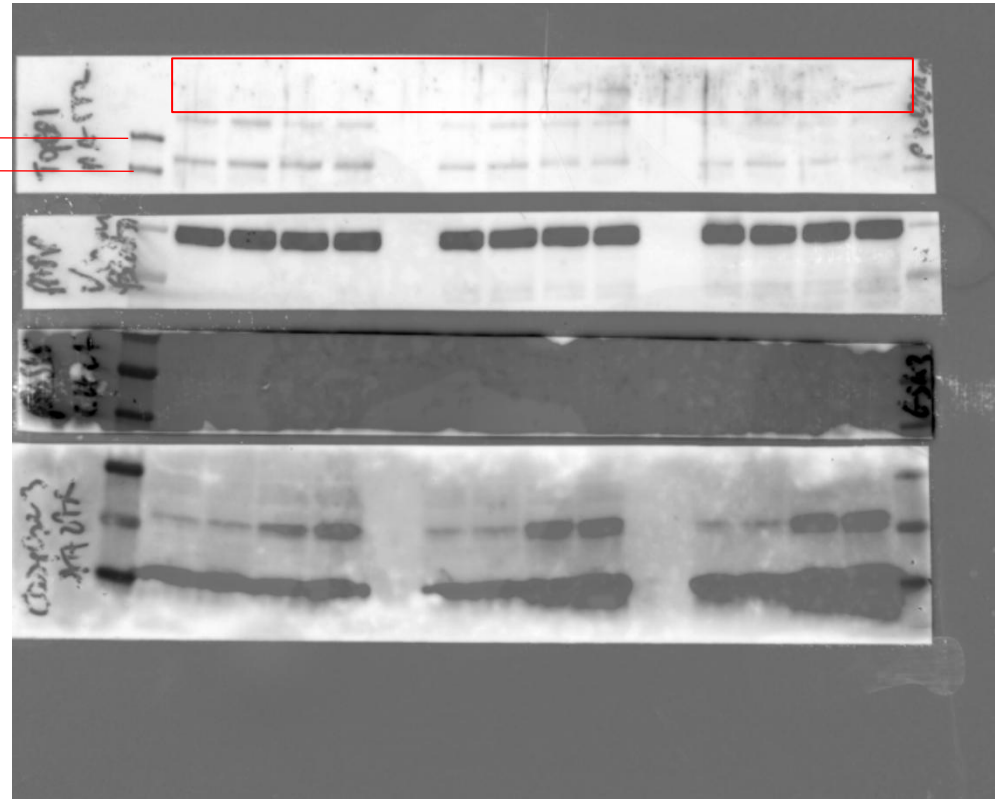

## Chemiluminescence bands for pDNA-PK

pDNA-PK  
(S2056)

250 kDa  
180 kDa

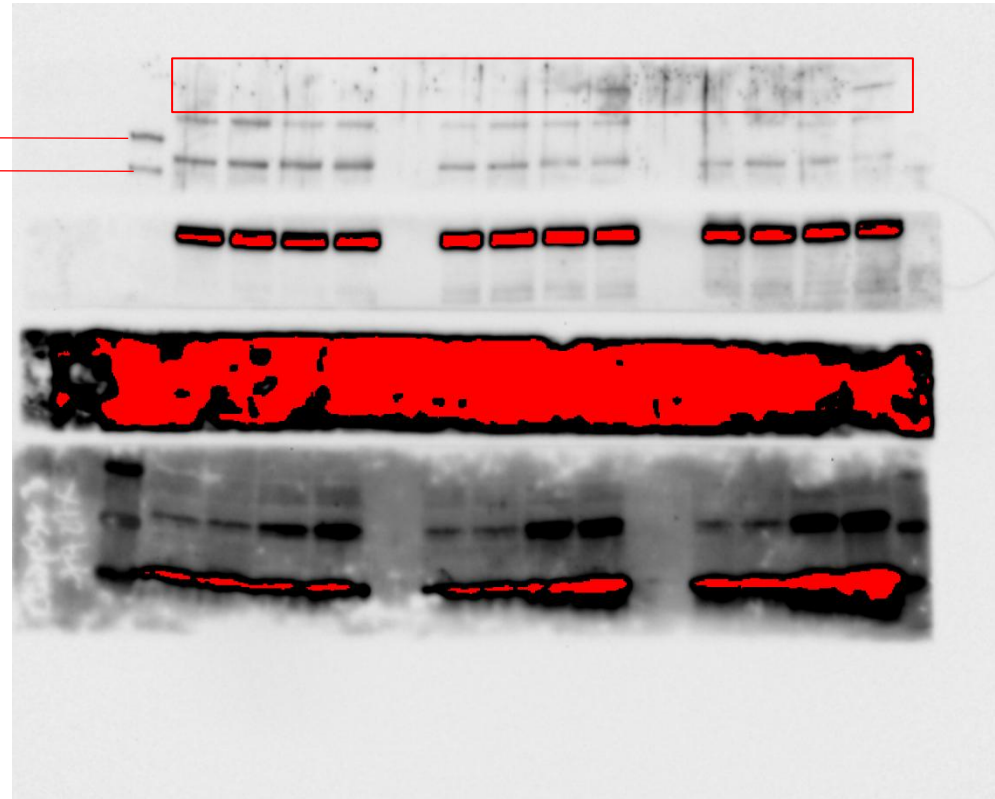

Colorimetric for pDNA-PK

pDNA-PK  
(S2056)

250 kDa  
180 kDa

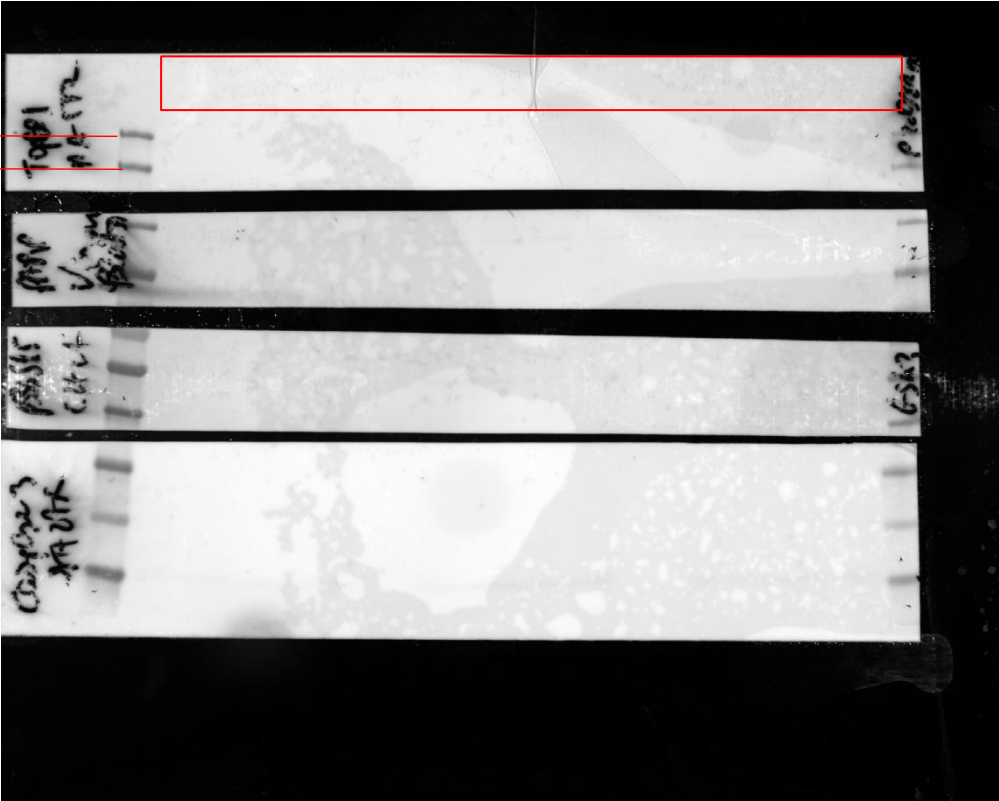

Merge chemiluminescence bands/colorimetric for TopBP1

TopBP1

250 kDa  
180 kDa

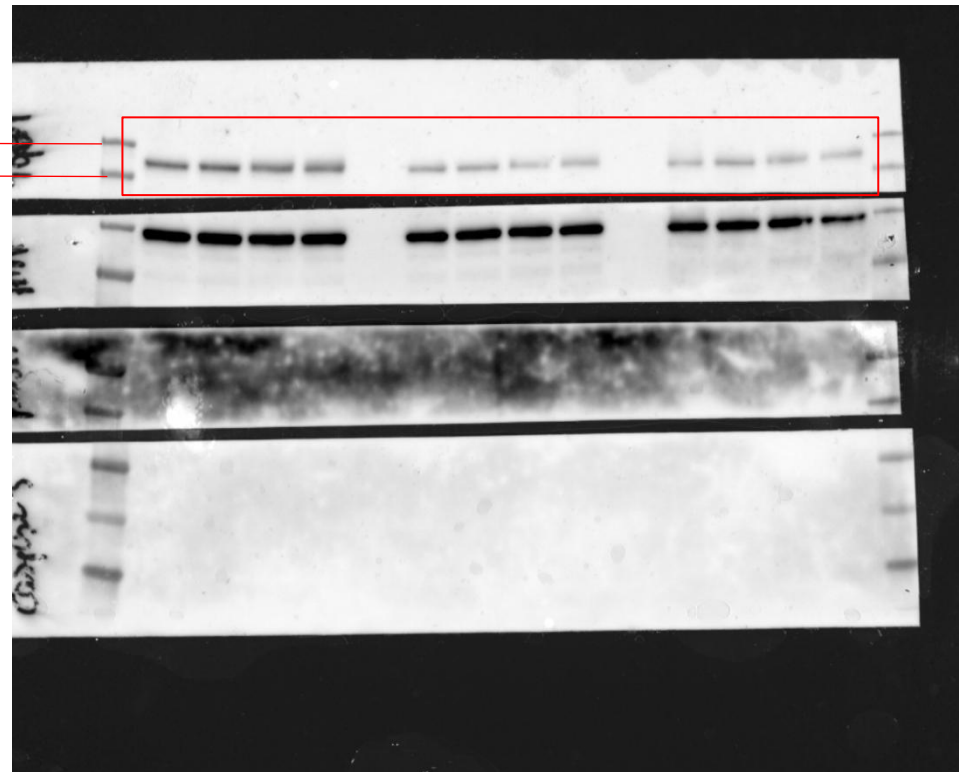



## Chemiluminescence bands for TopBP1

TopBP1

250 kDa

180 kDa

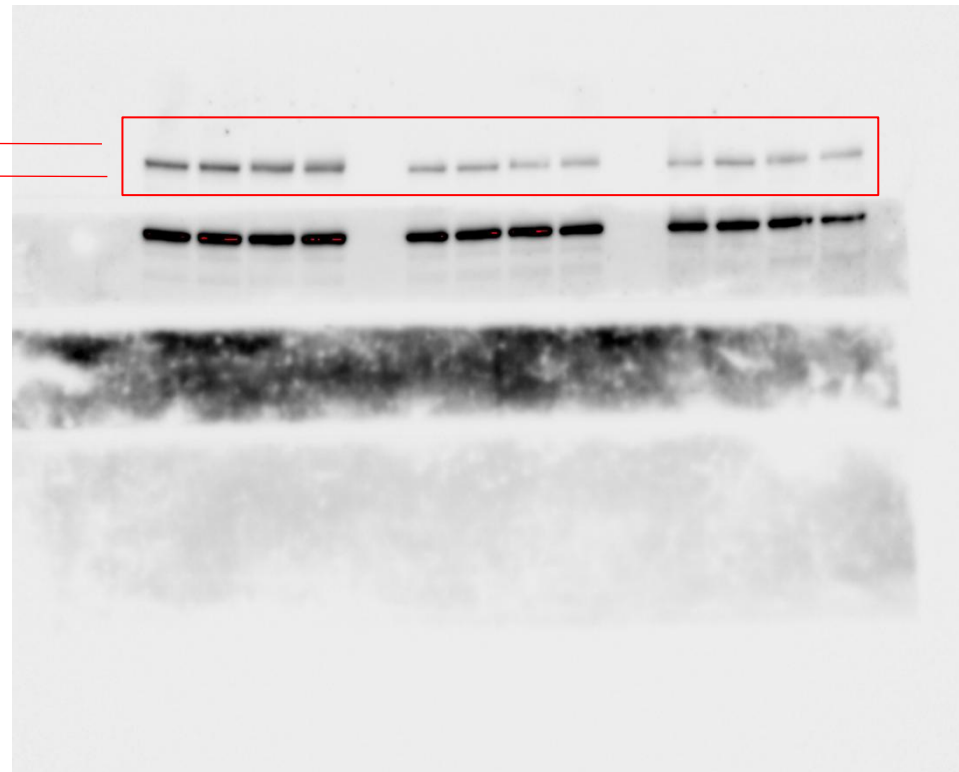

Merge chemiluminescence bands/colorimetric for PARP (low exp)

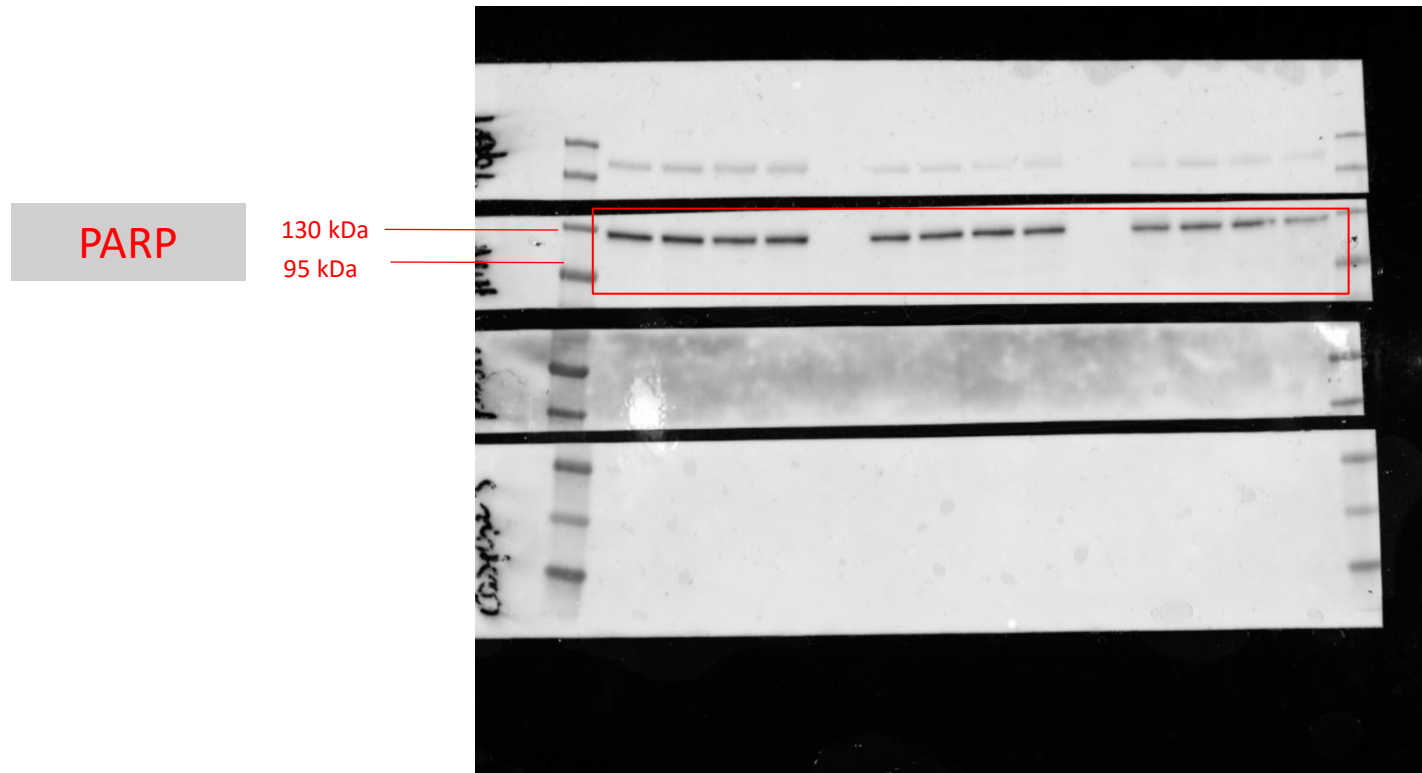

Chemiluminescence bands for PARP (low exp)

PARP

130 kDa  
95 kDa

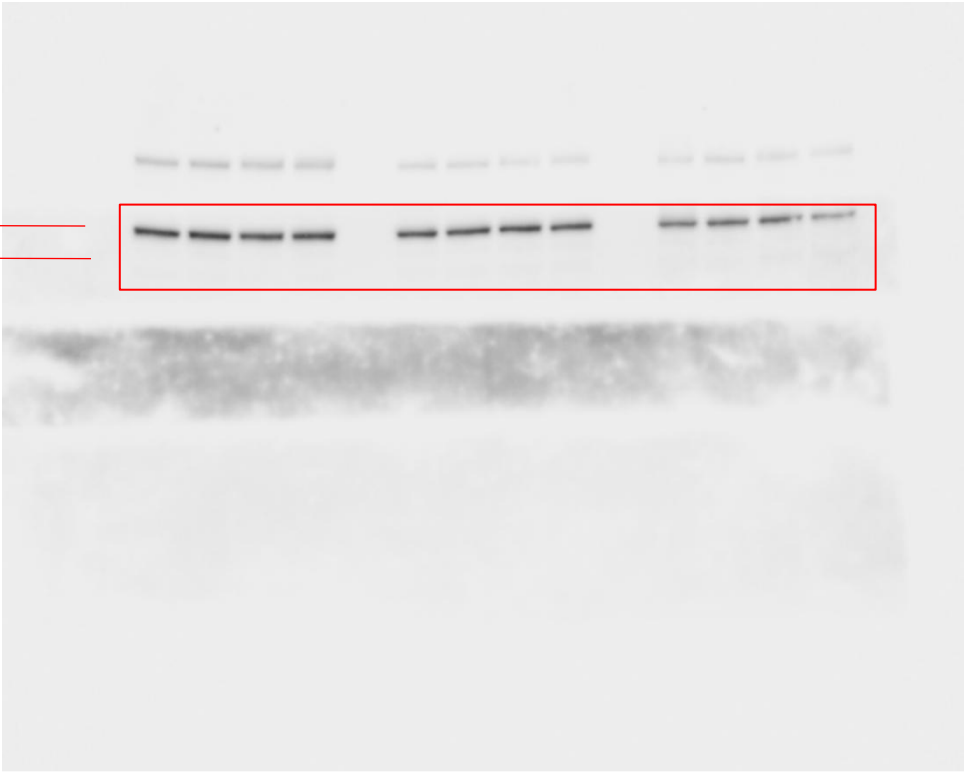

Merge chemiluminescence bands/colorimetric for PARP cleaved (high exp)

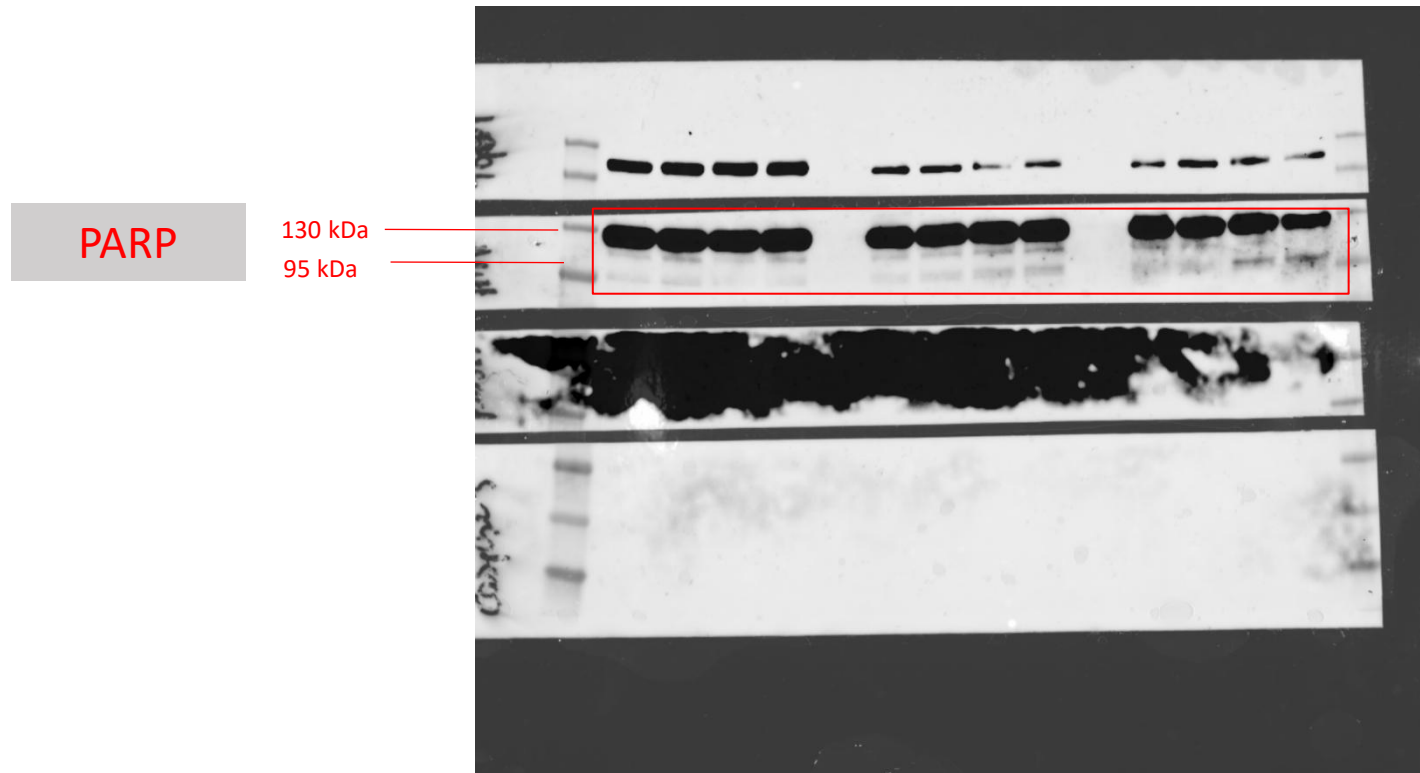

Chemiluminescence bands for PARP (high exp)

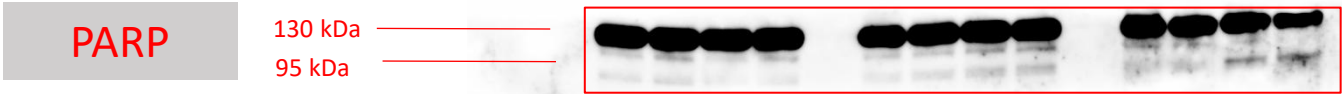

Colorimetric for TopBP1 & PARP

TopBP1

PARP

- 250 kDa
- 180 kDa
- 130 kDa
- 95 kDa

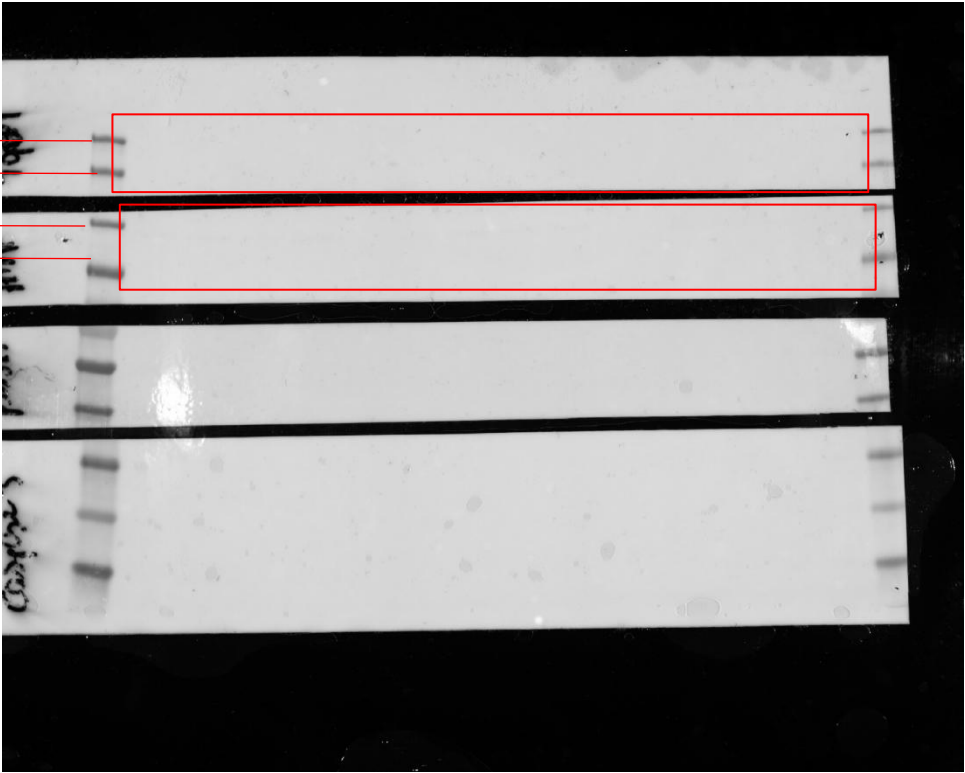

Colorimetric for pATR &  $\gamma$ H2AX

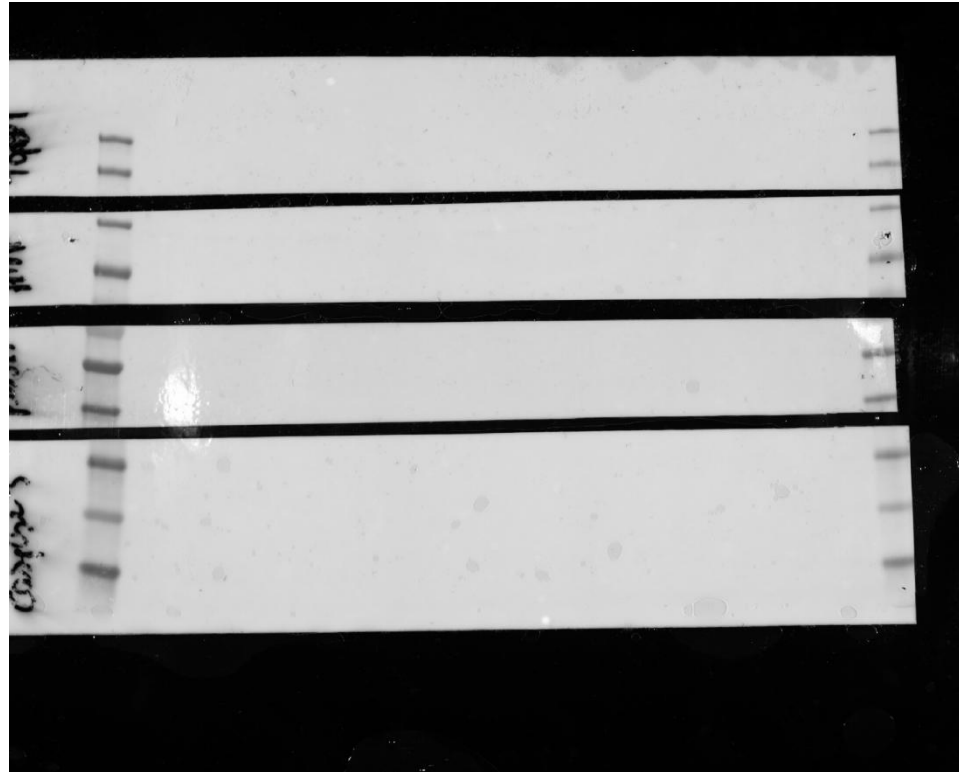

Merge chemiluminescence bands/colorimetric for CHK1 & Vinculin

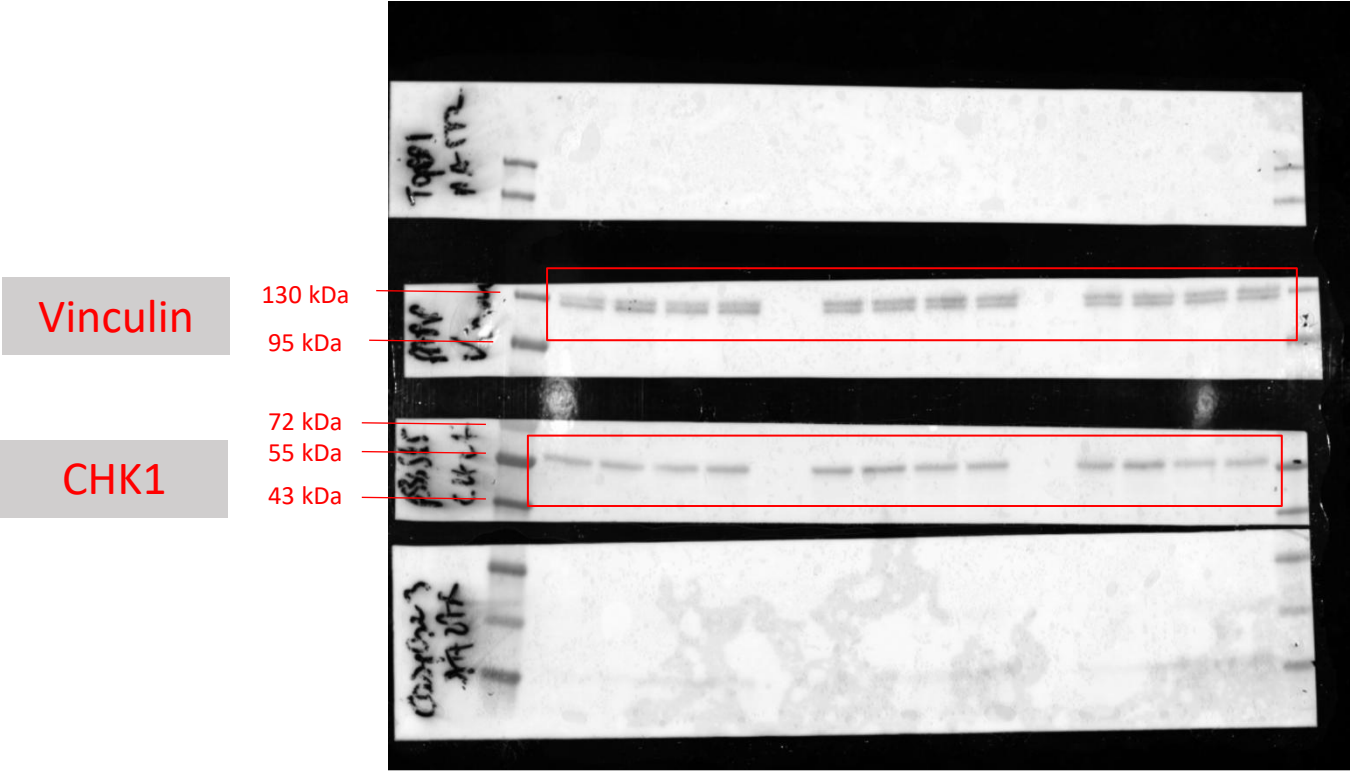



Chemiluminescence bands for CHK1 & Vinculin

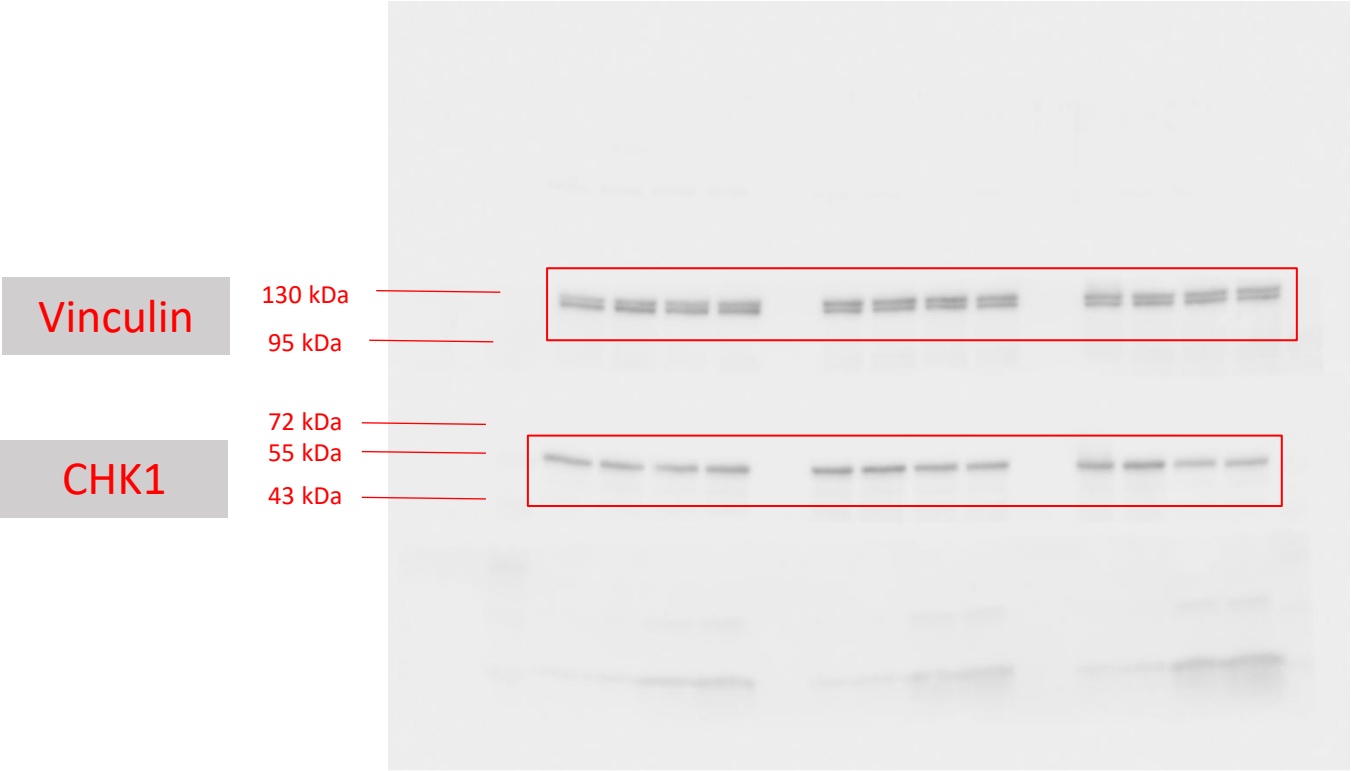

Merge chemiluminescence bands/colorimetric for  $\gamma$ H2AX

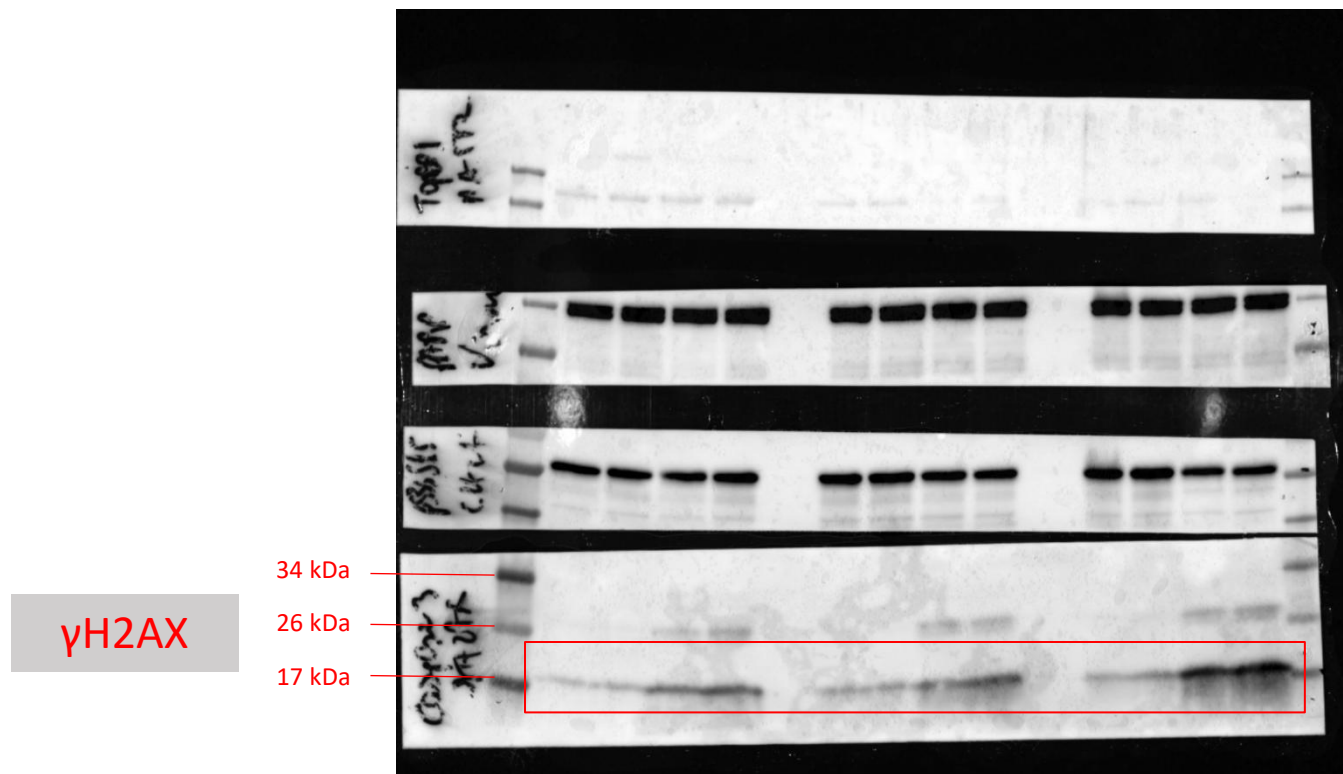

Chemiluminescence bands for  $\gamma$ H2AX

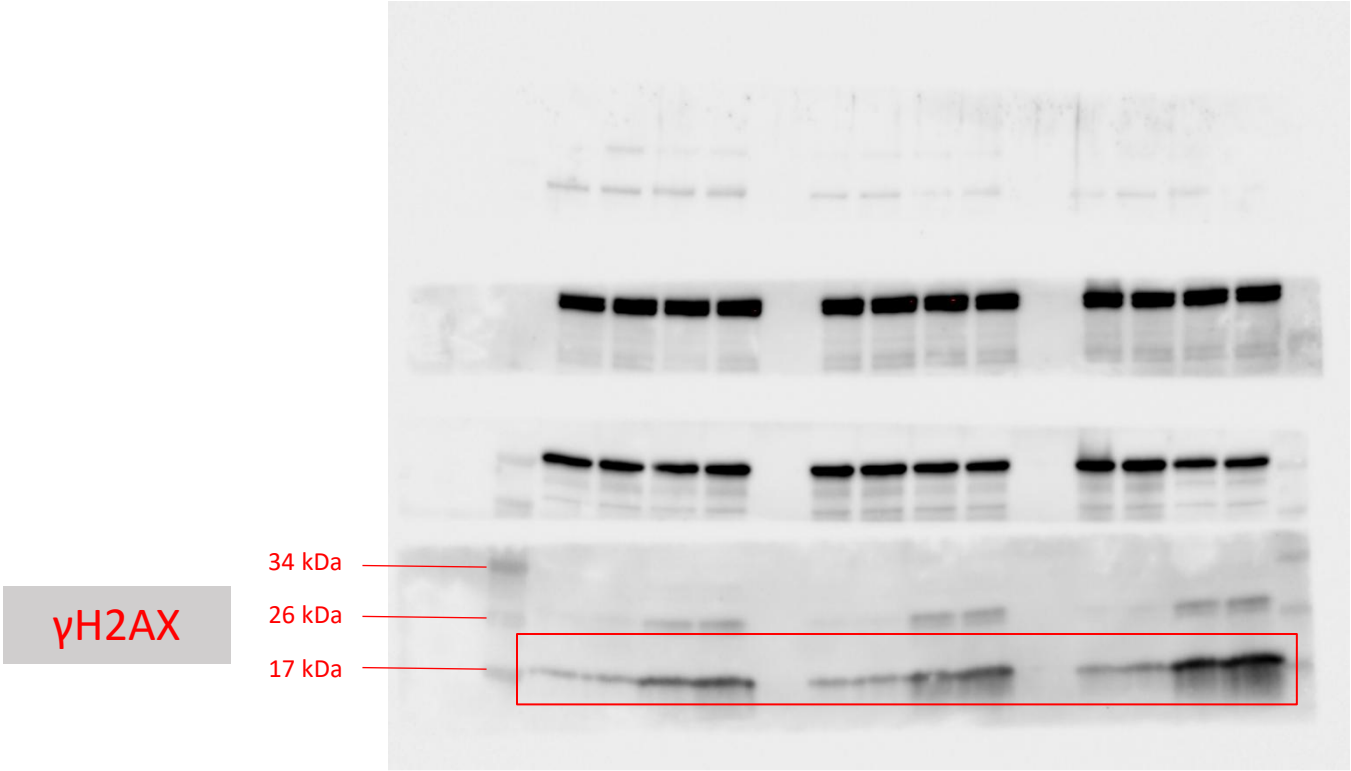

Colorimetric for CHK1,  $\gamma$ H2AX, vinculin

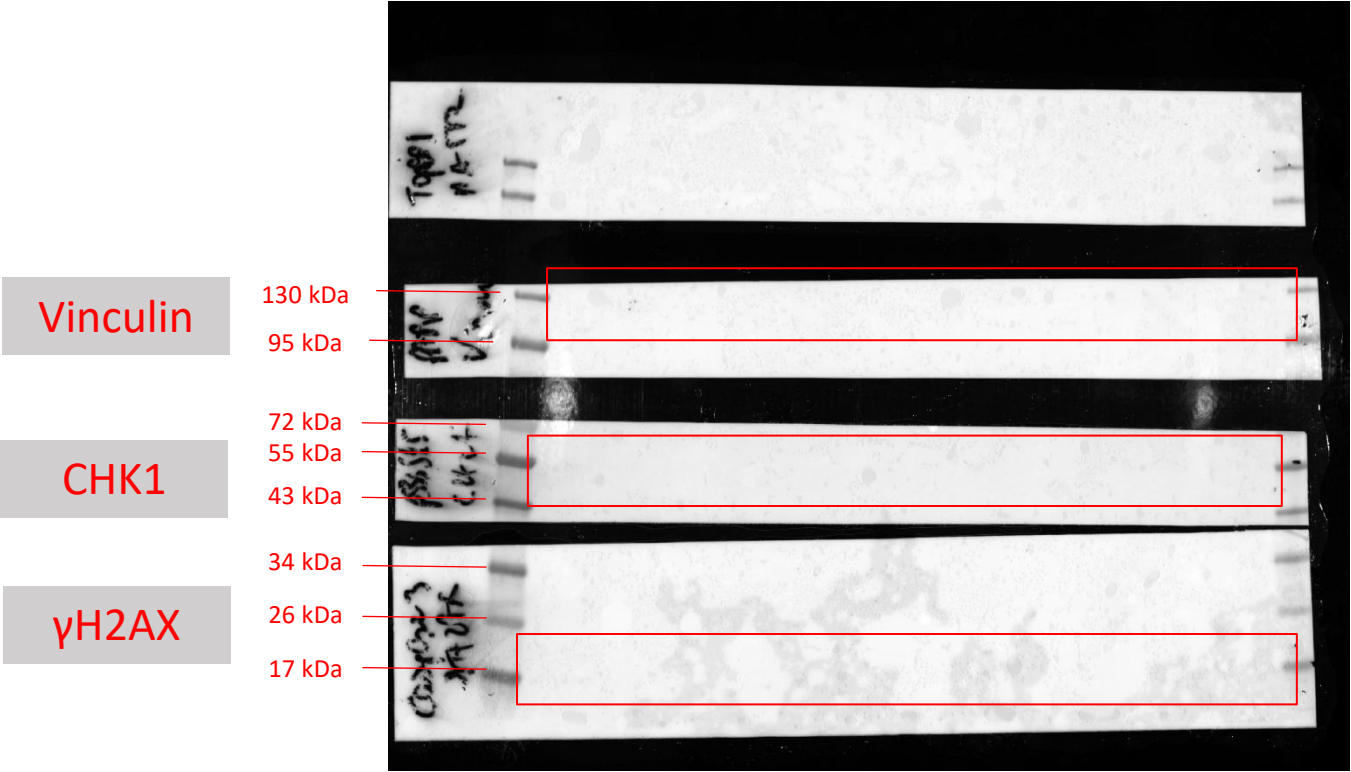

Supplement: fig3-data1 [file Fig 3E-Source Data 1.pdf › Fig 3D and E- Source Data 1/Fig 3E-Source Data 1.pdf]
