# Supplementary material for: TopBP1 biomolecular condensates as a new therapeutic target in advanced-stage colorectal cancer
Source: eLife journal article supplement (doi:10.7554/elife.106196), 2025-05-15

**Figure 4.C**

|                     |   |   |     |     |     |     |
|---------------------|---|---|-----|-----|-----|-----|
| AZD2858 (100 nM)    | - | + | -   | +   | -   | +   |
| SN-38 (nM)          | - | - | 1.5 | 1.5 | 1.5 | 1.5 |
| 5-Fluorouracil (nM) | - | - | -   | -   | 222 | 222 |

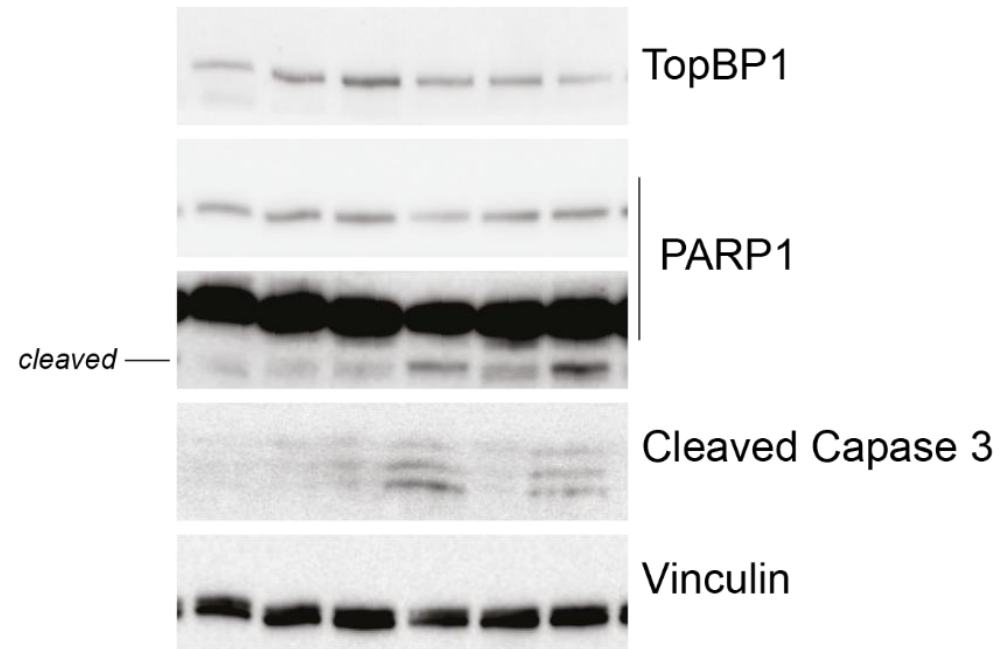

**Figure 4C, Source Data 1.** Below are the Original membranes corresponding to Figure 4C.  
Immunoblot of the indicated proteins in HCT116 cells after 48-h incubation as described in Figure 4A.

Merge chemiluminescence bands/colorimetric for Vinculin

## Vinculin

Chemiluminescence bands for vinculin

Vinculin

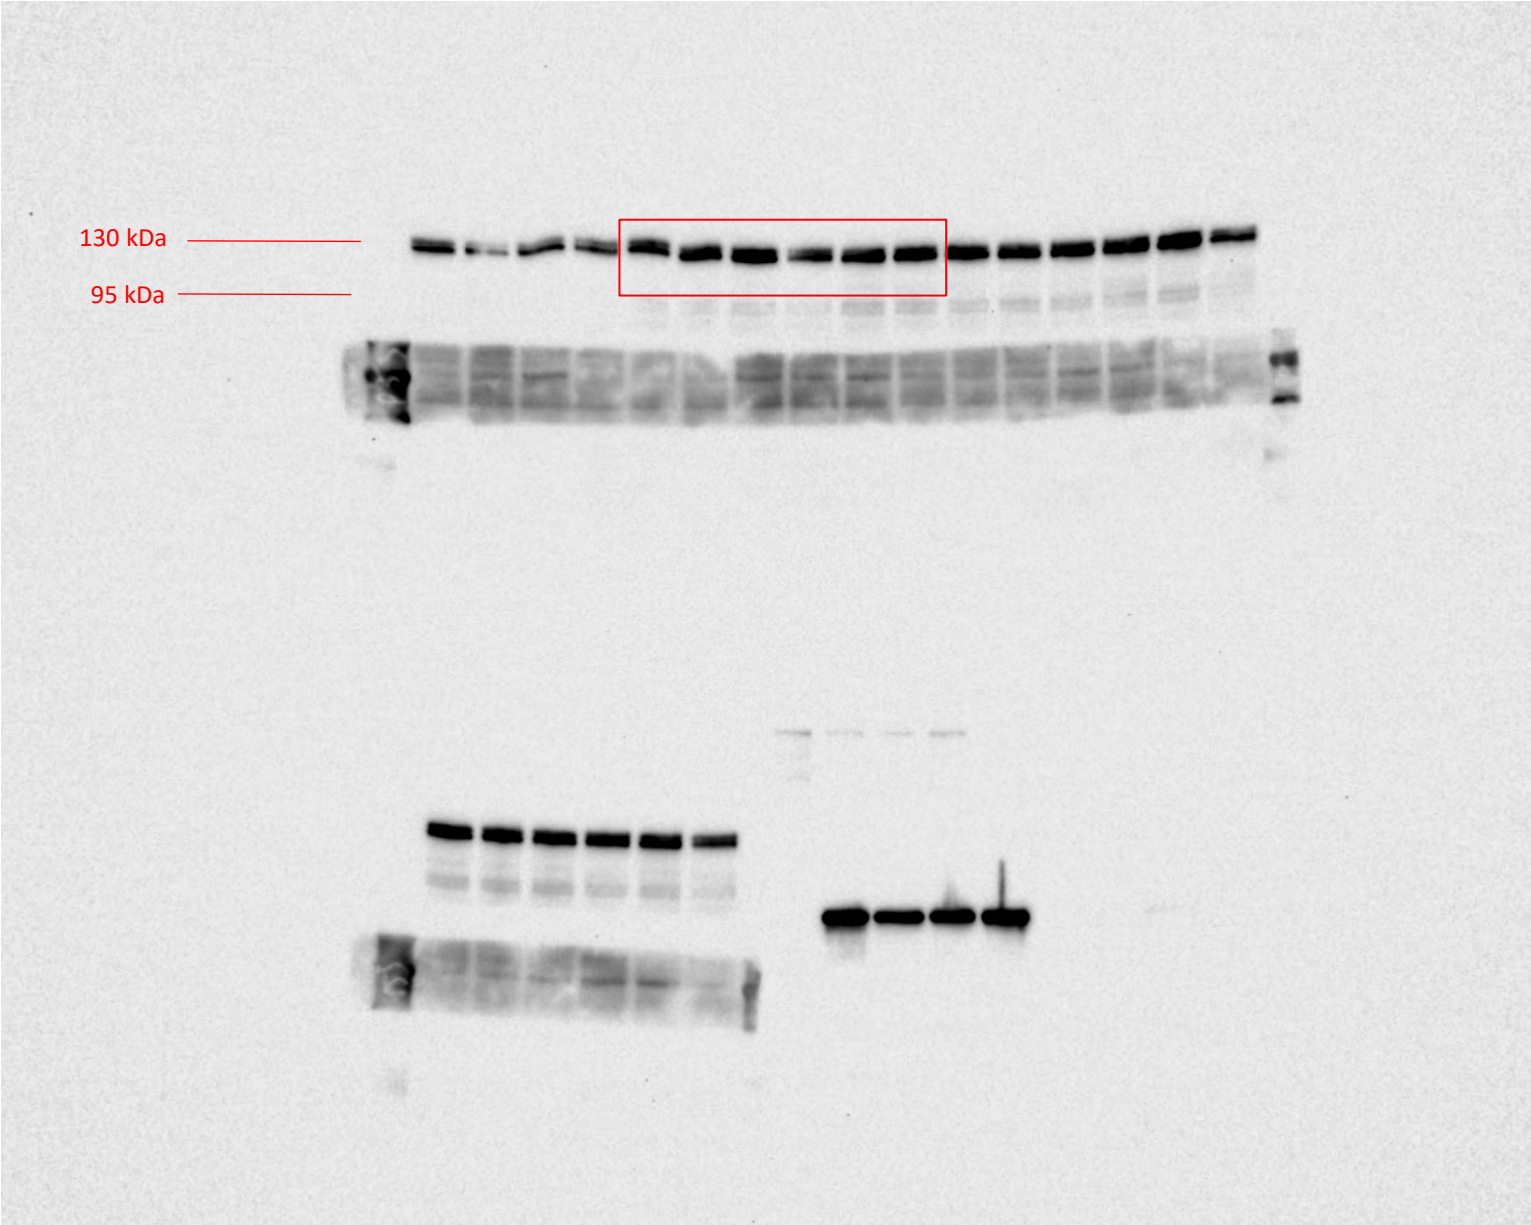

## Colorimetric for Vinculin

## Vinculin

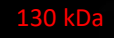

95 kDa

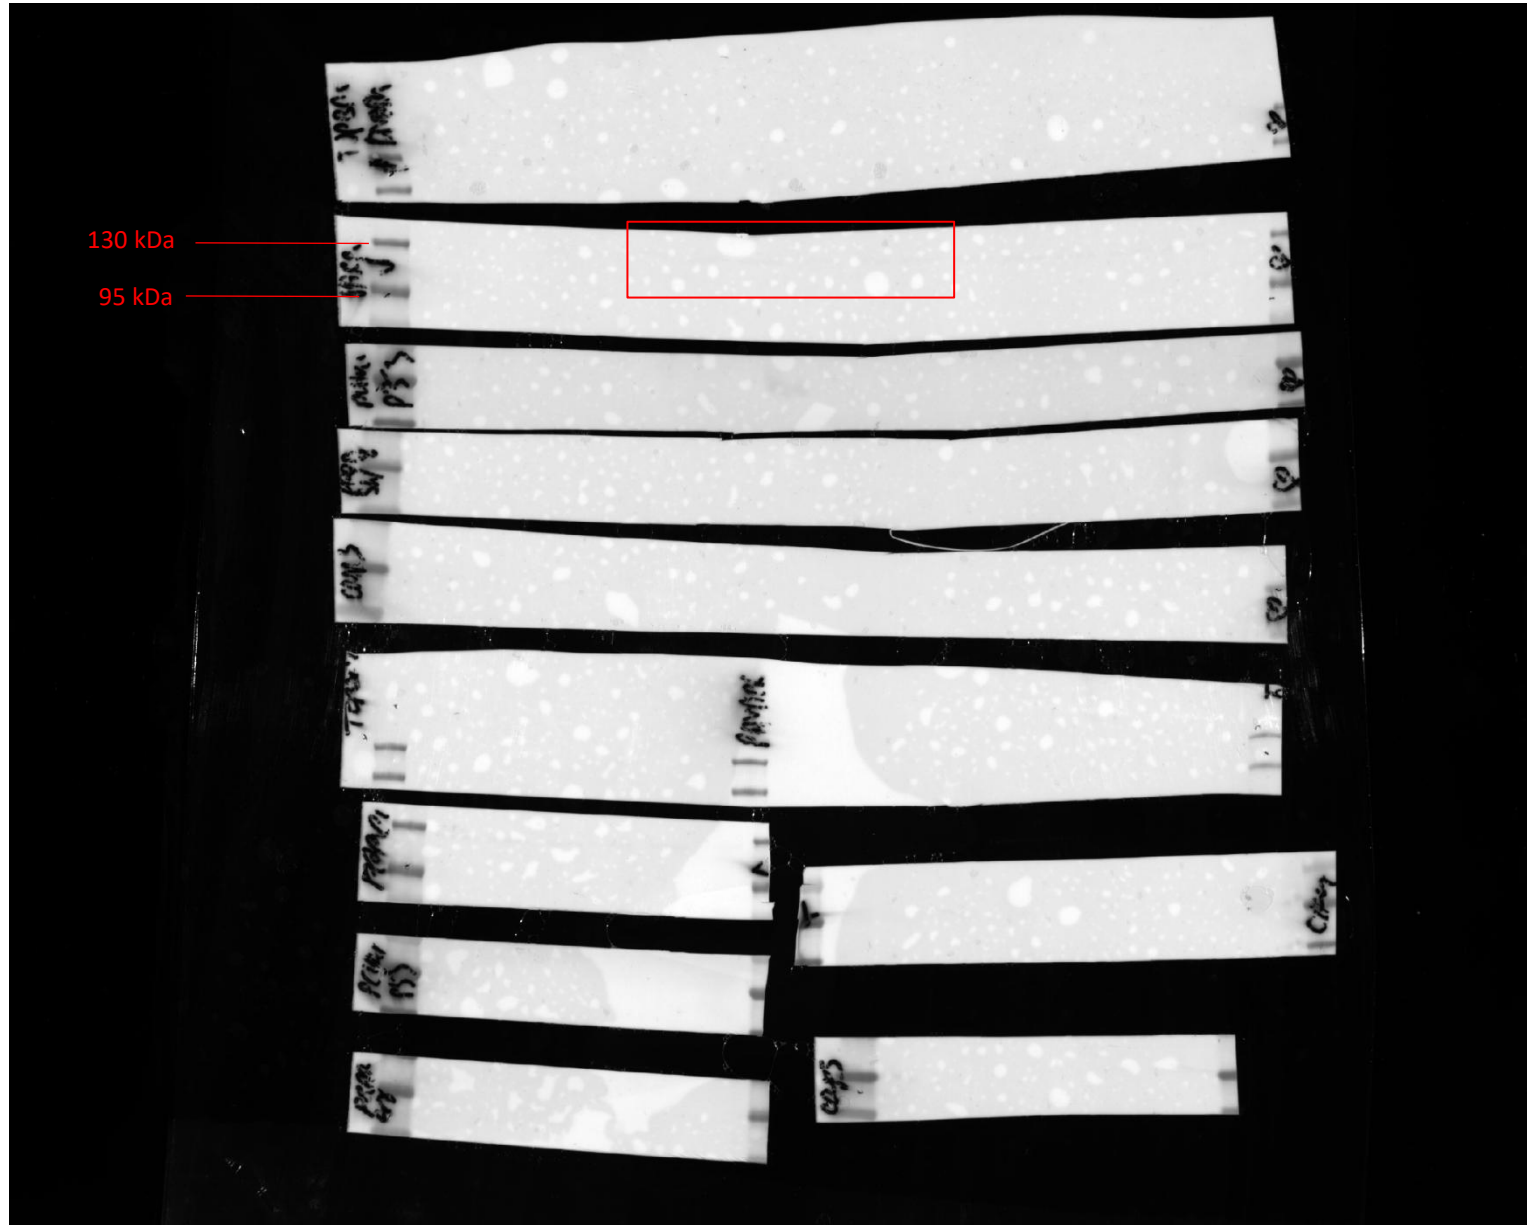

Merge chemiluminescence bands/colorimetric for TopBP1

TopBP1

250 kDa  
180 kDa

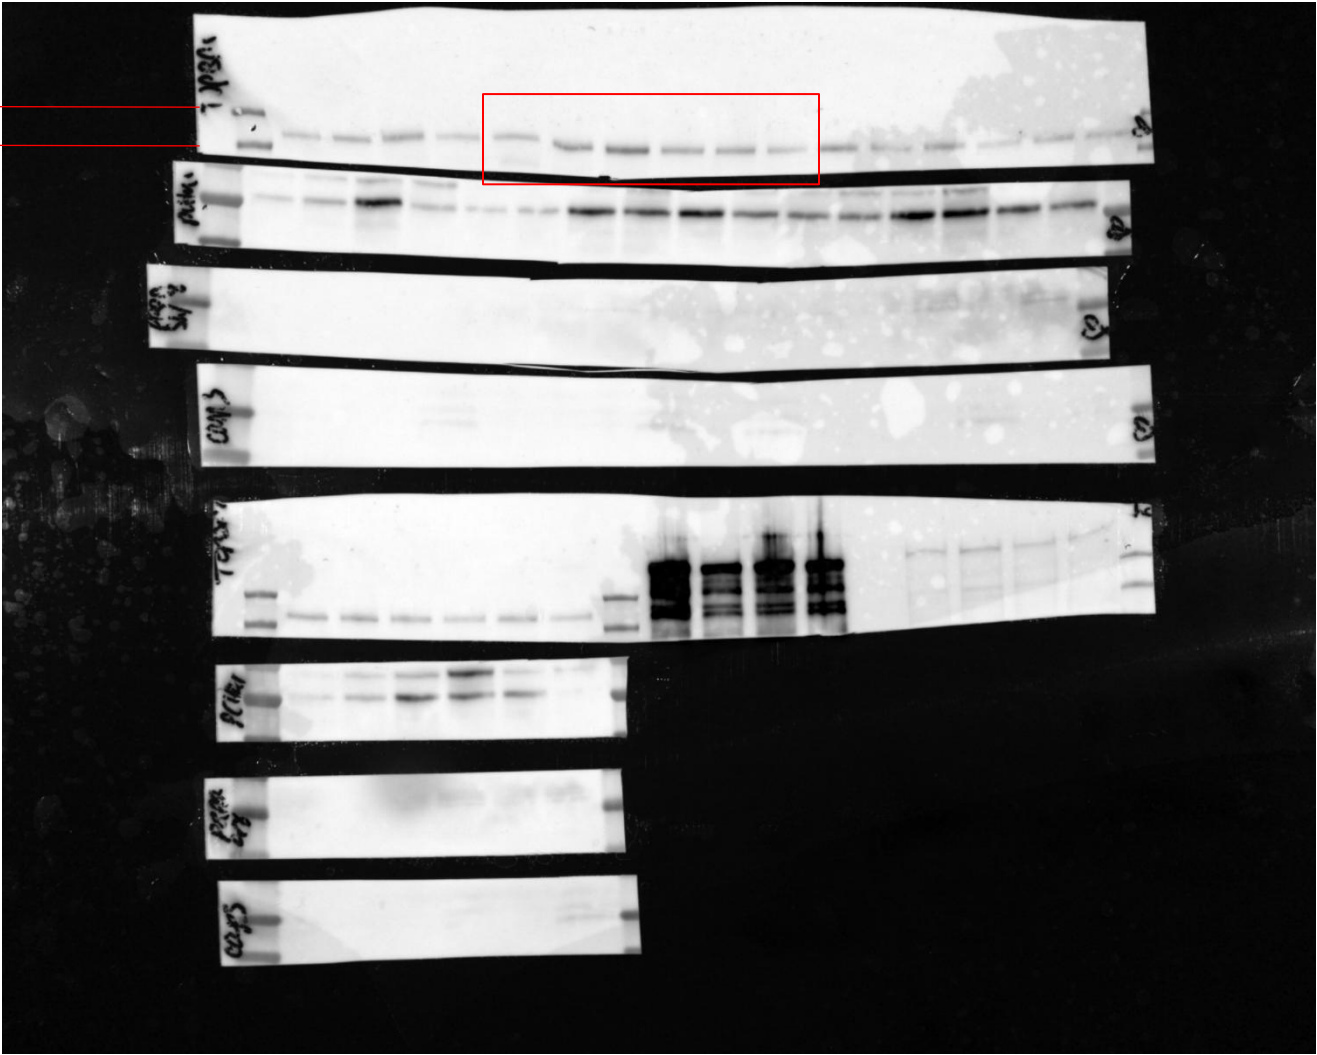



Chemiluminescence bands for TopBP1

TopBP1

250 kDa  
180 kDa

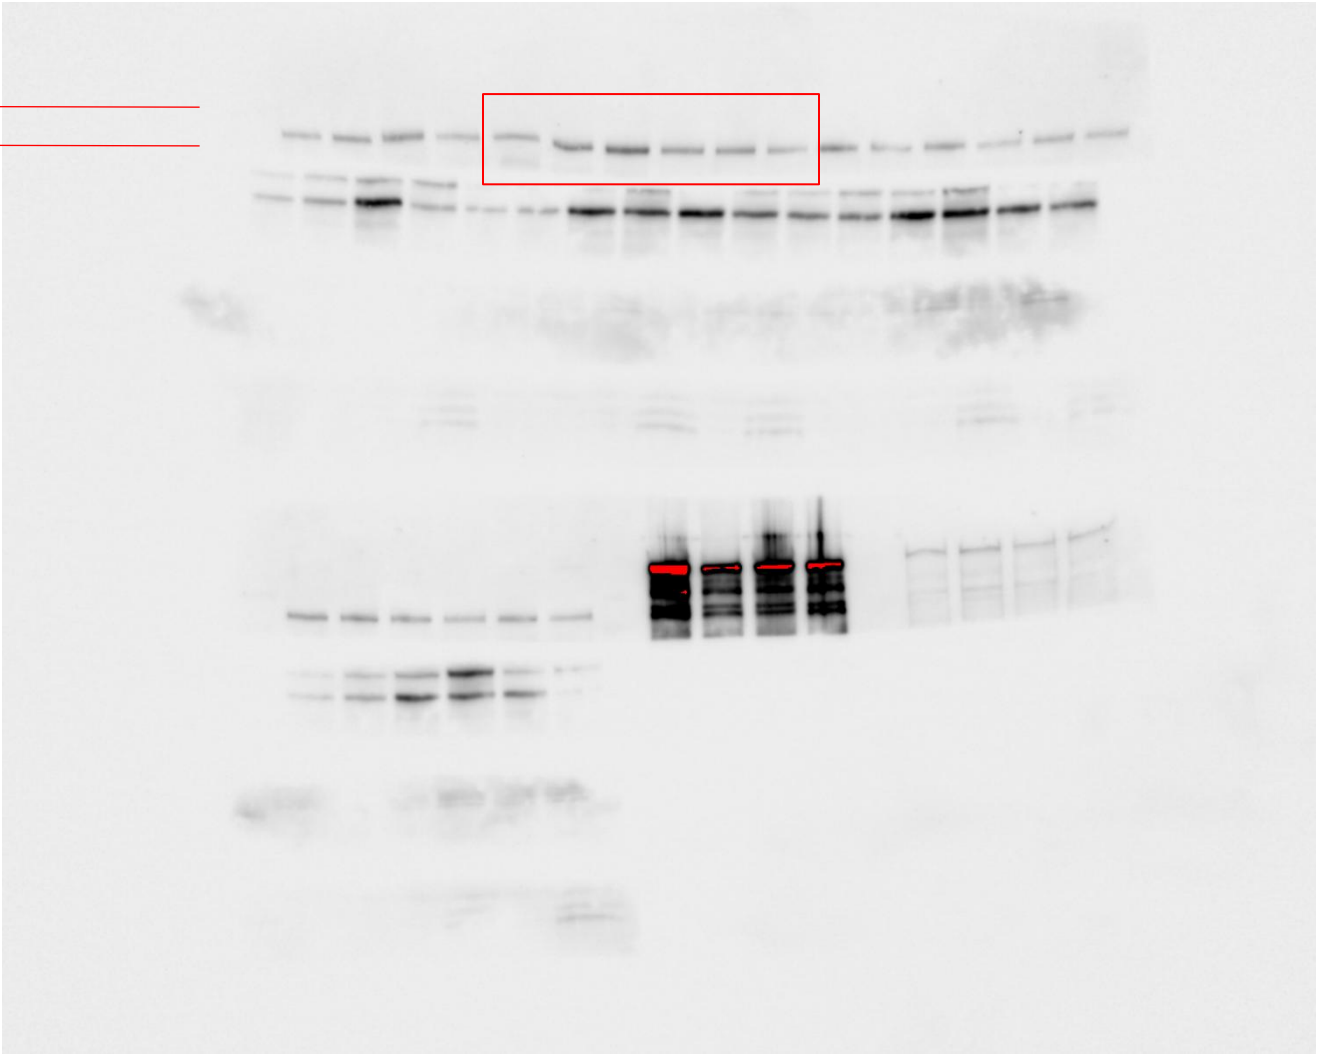

Merge chemiluminescence bands/colorimetric for cleaved caspase-3

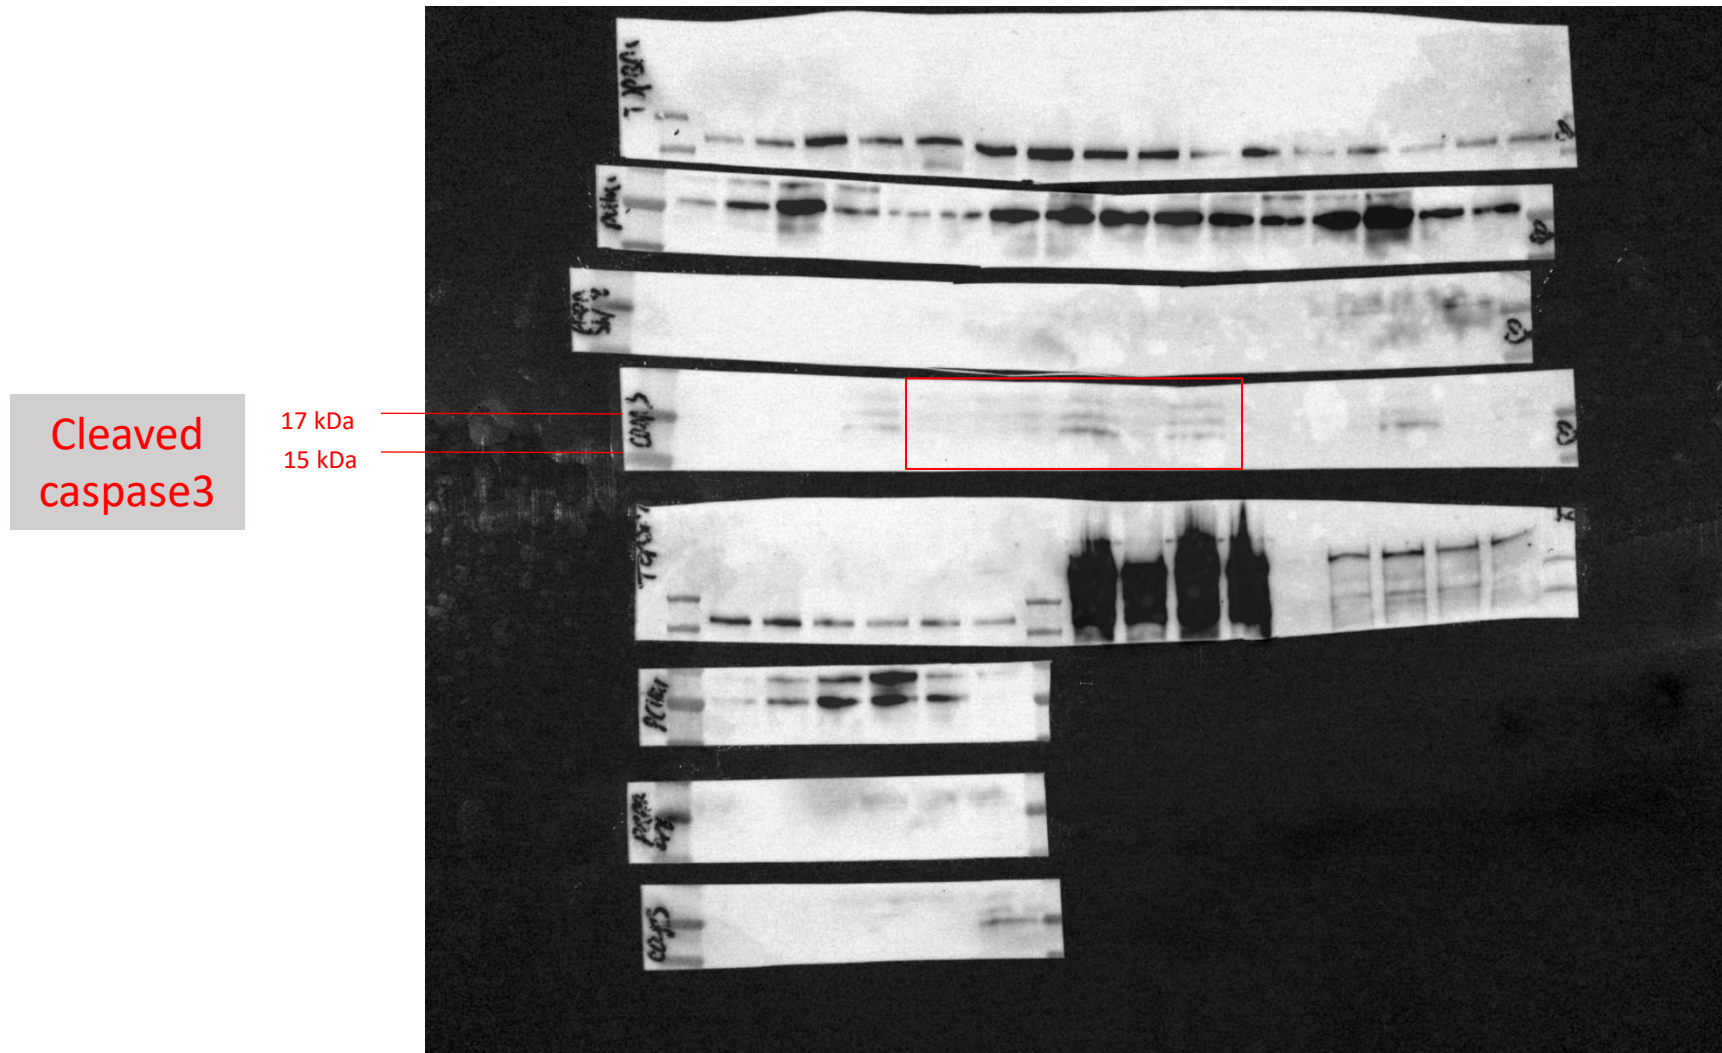

## Chemiluminescence bands for cleaved caspase 3

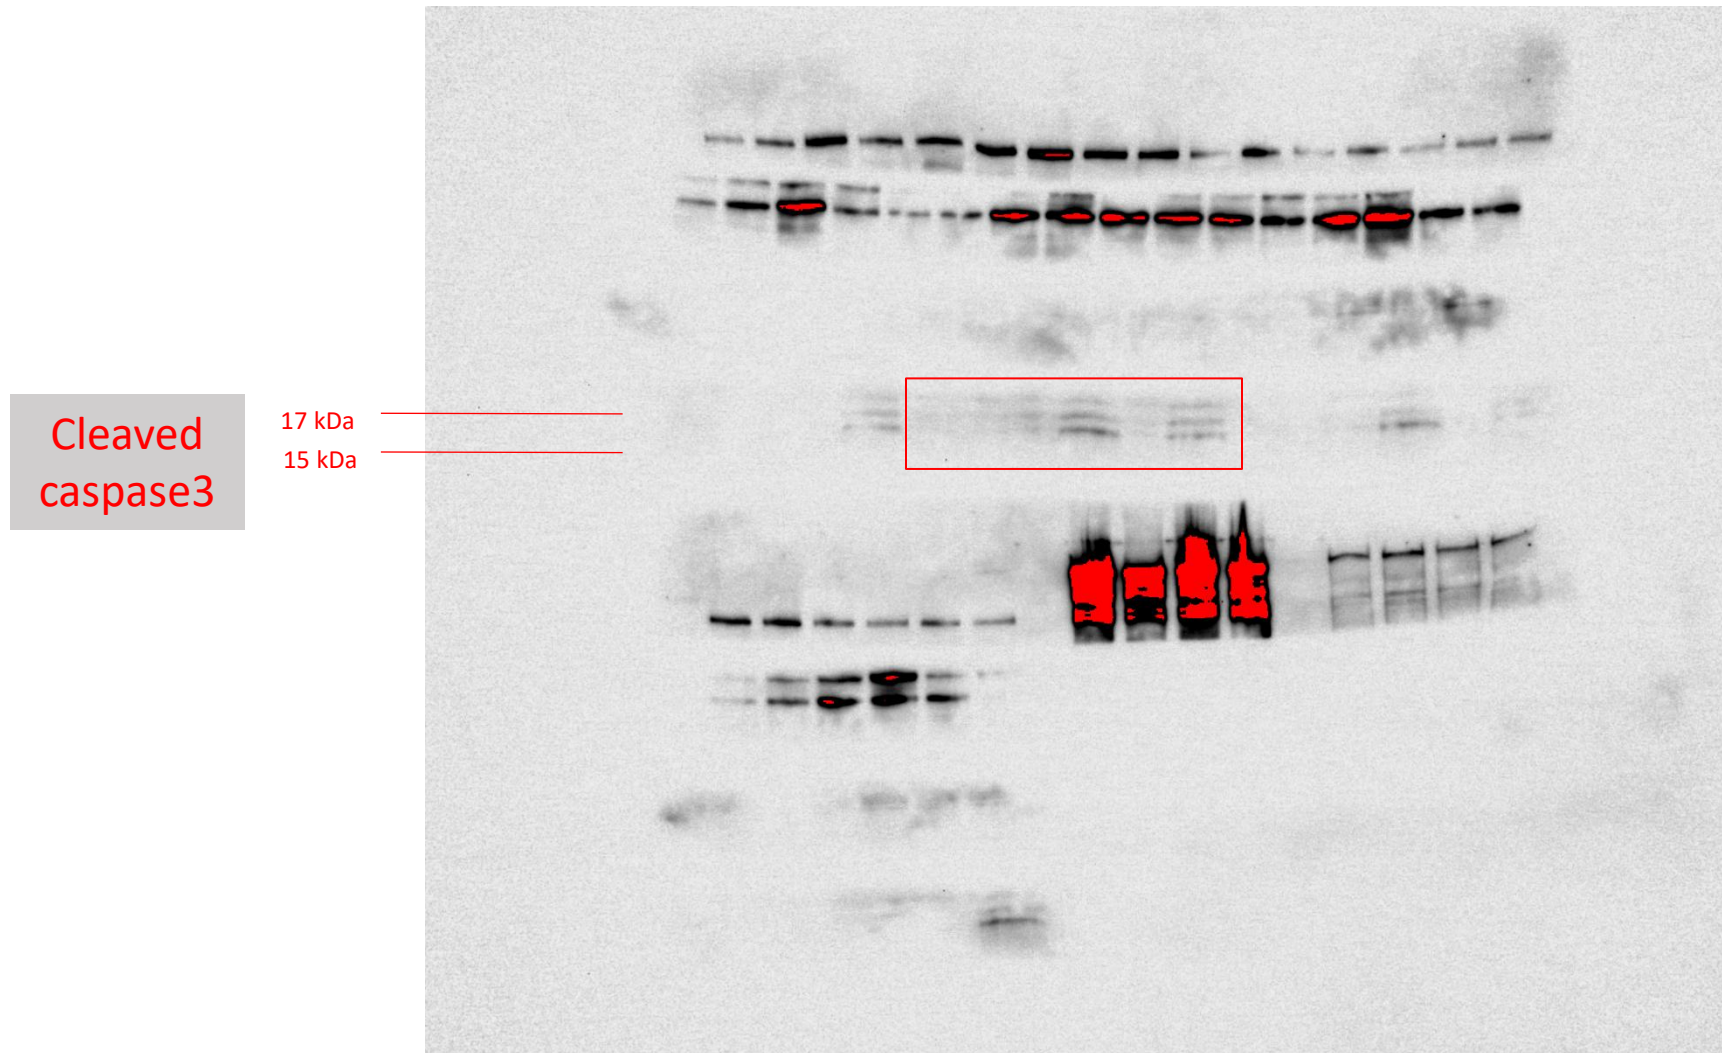



Colorimetric for TopBP1 & cleaved caspase 3

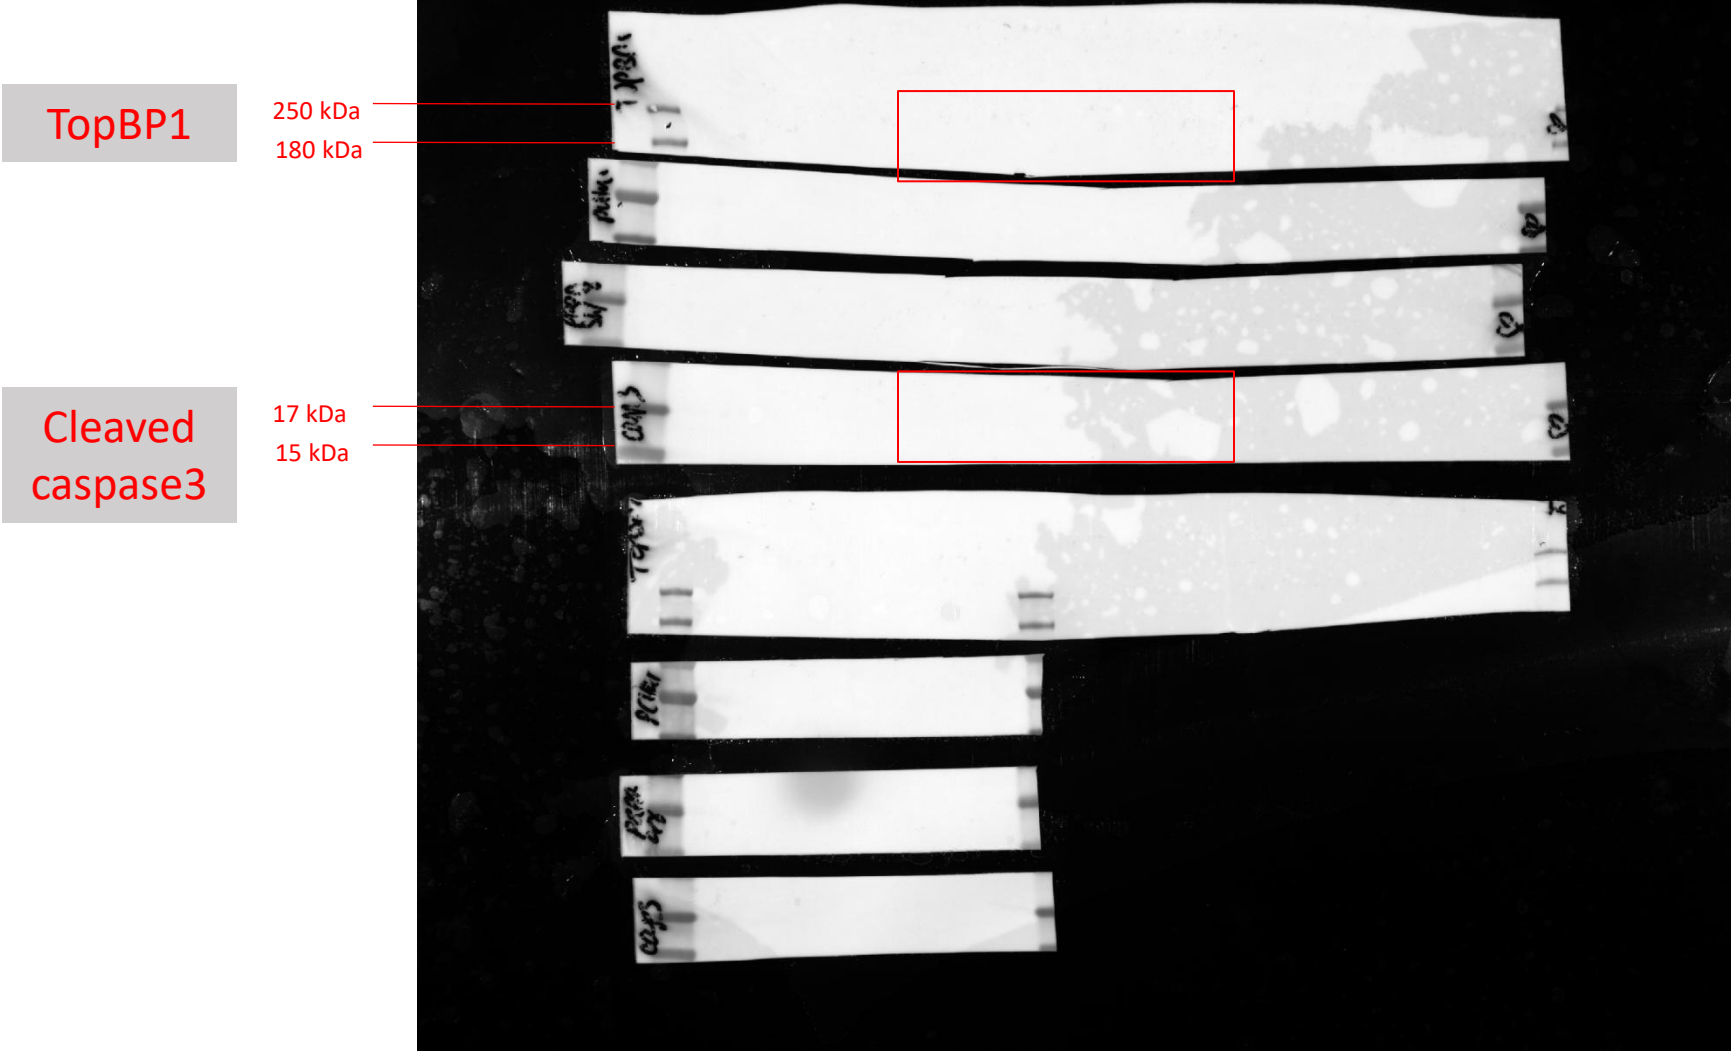

Merge chemiluminescence bands/colorimetric for PARP1 (low)

PARP1

130 kDa  
95 kDa

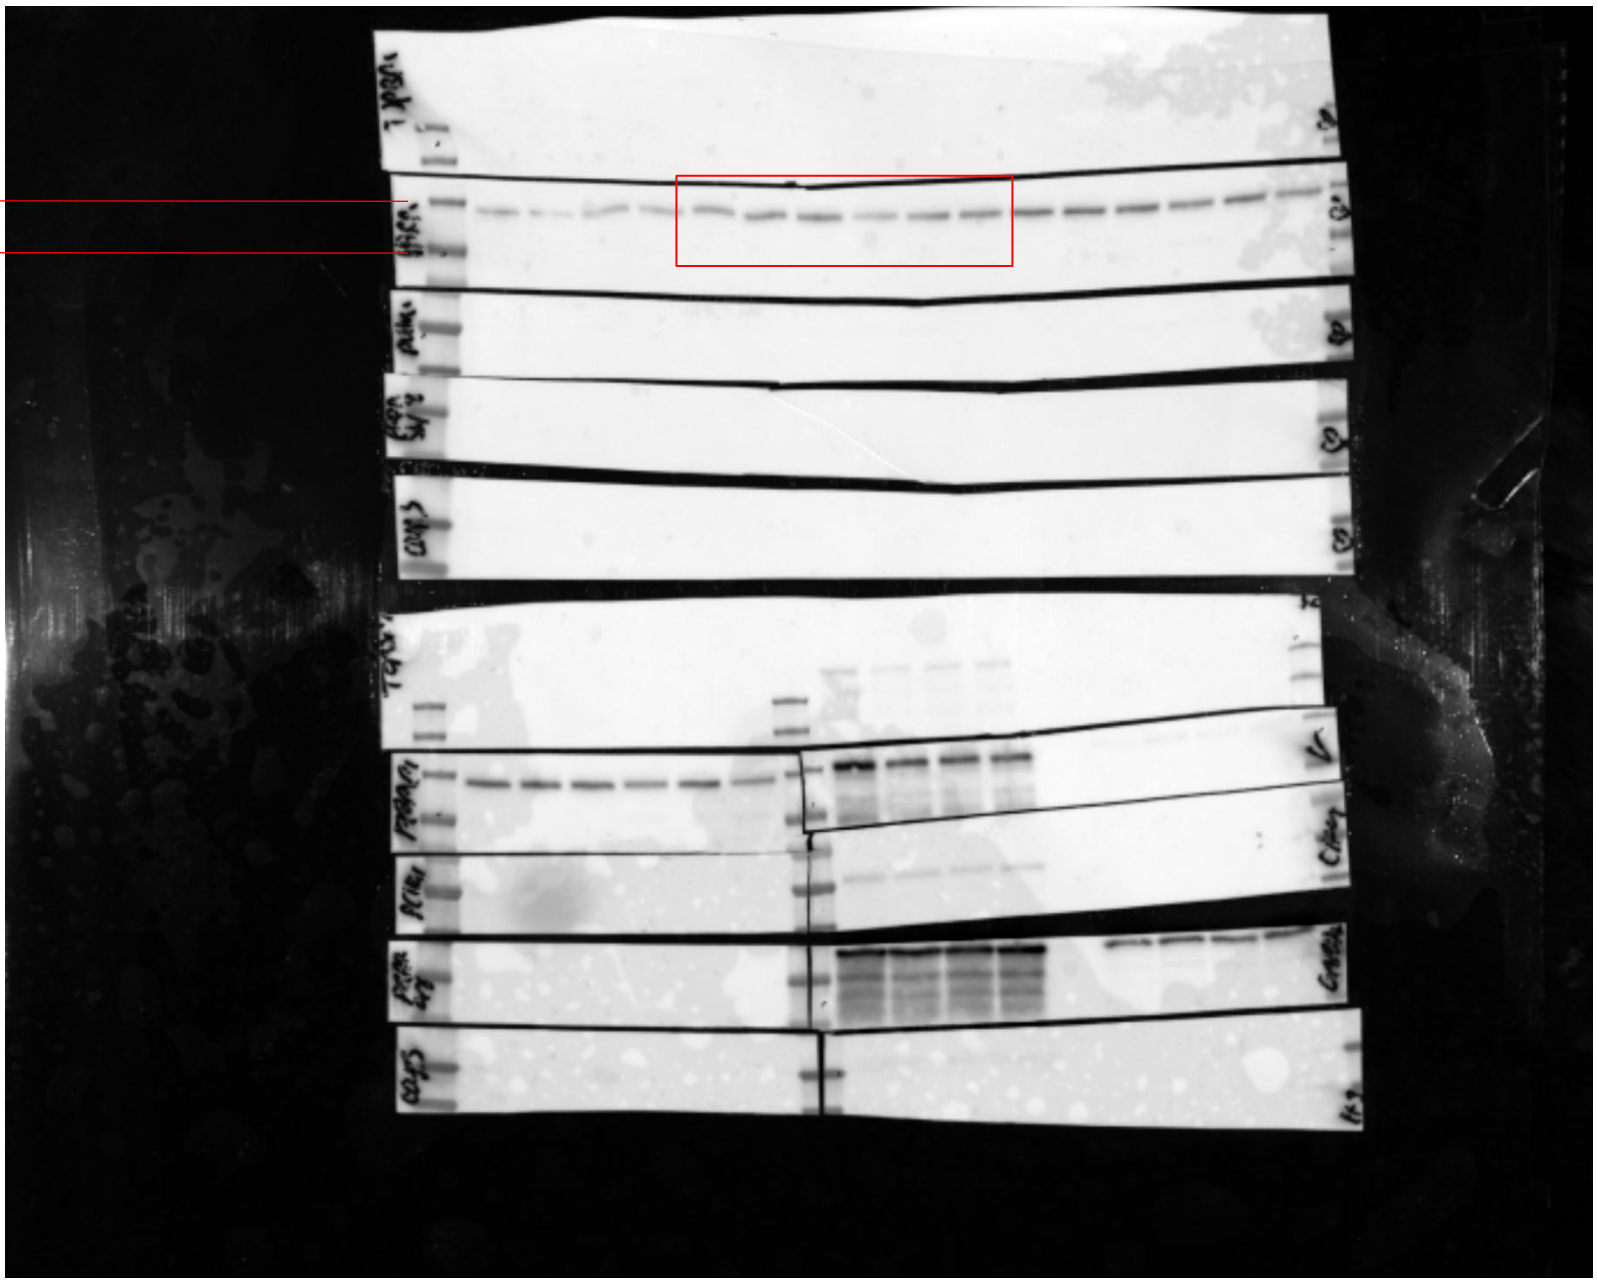

chemiluminescence for PARP1 (low)

PARP1

130 kDa

95 kDa

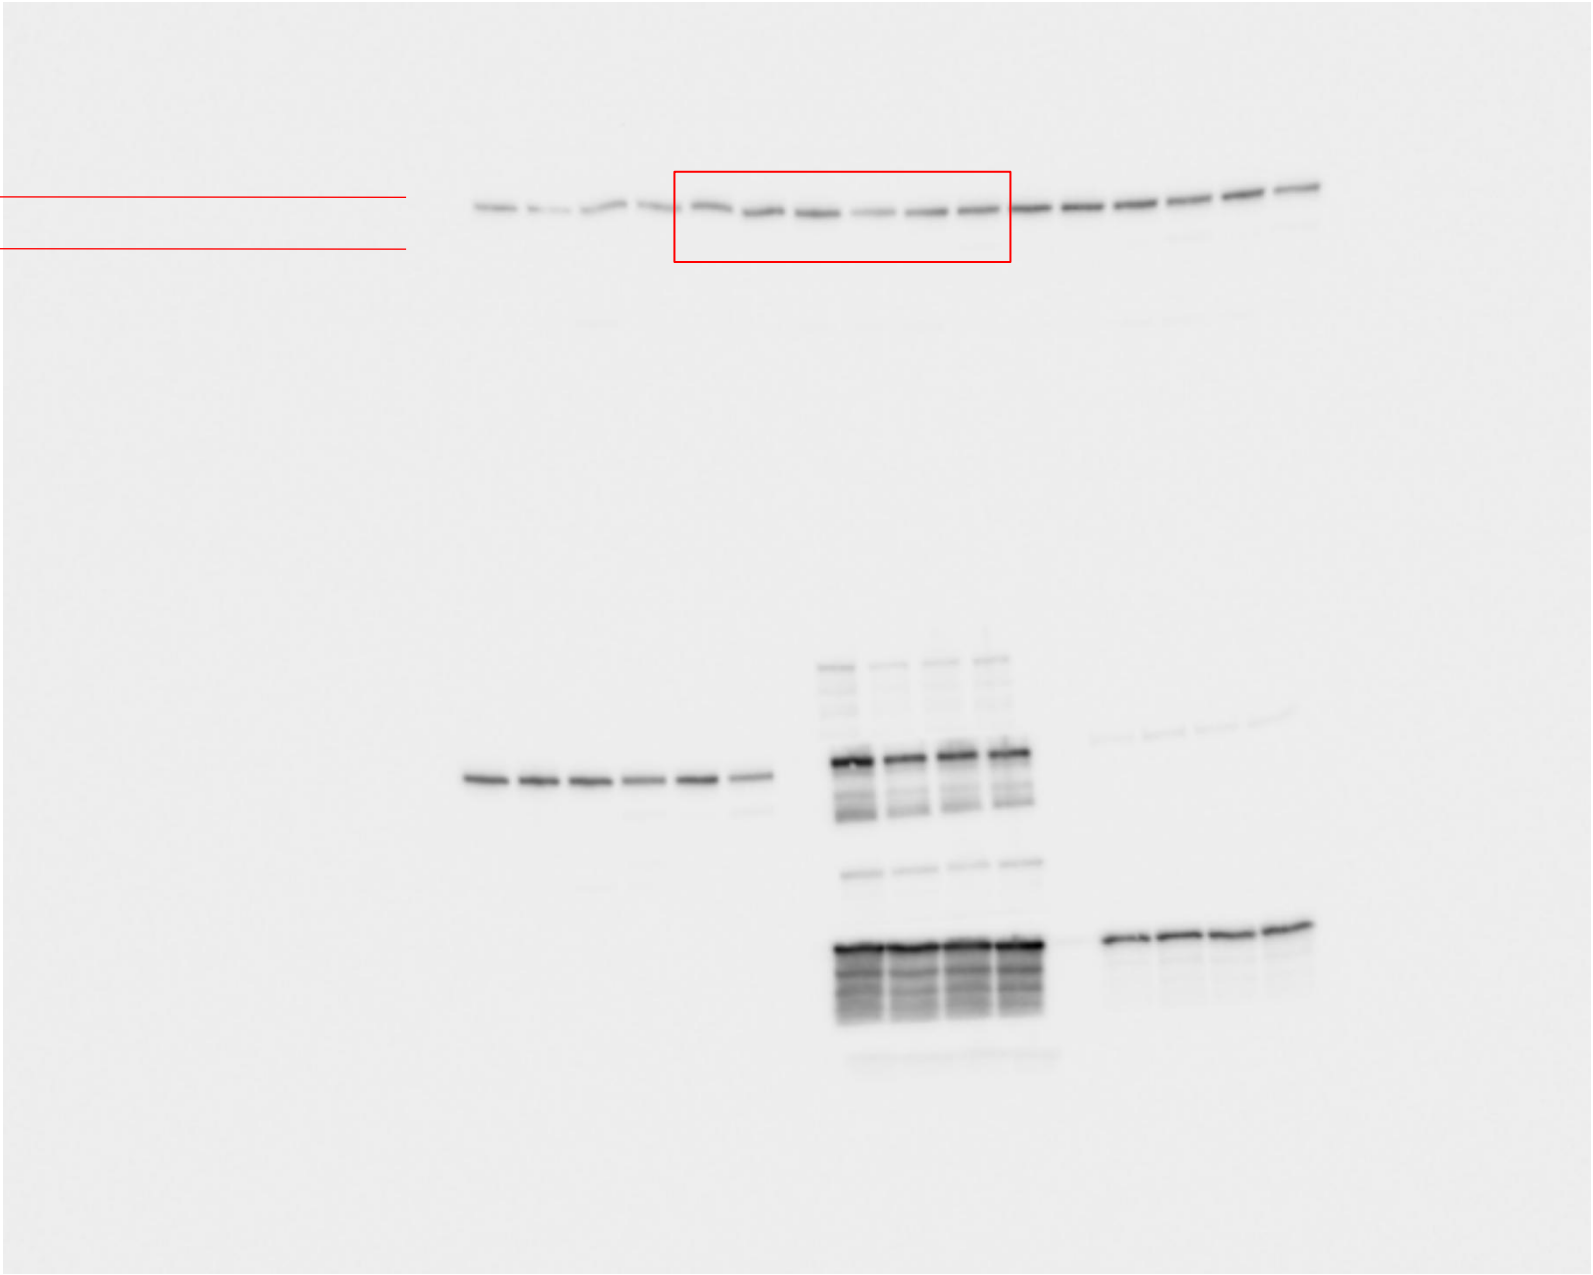

Merge chemiluminescence bands/colorimetric for PARP1 (high -> cleaved)

PARP1

130 kDa

95 kDa

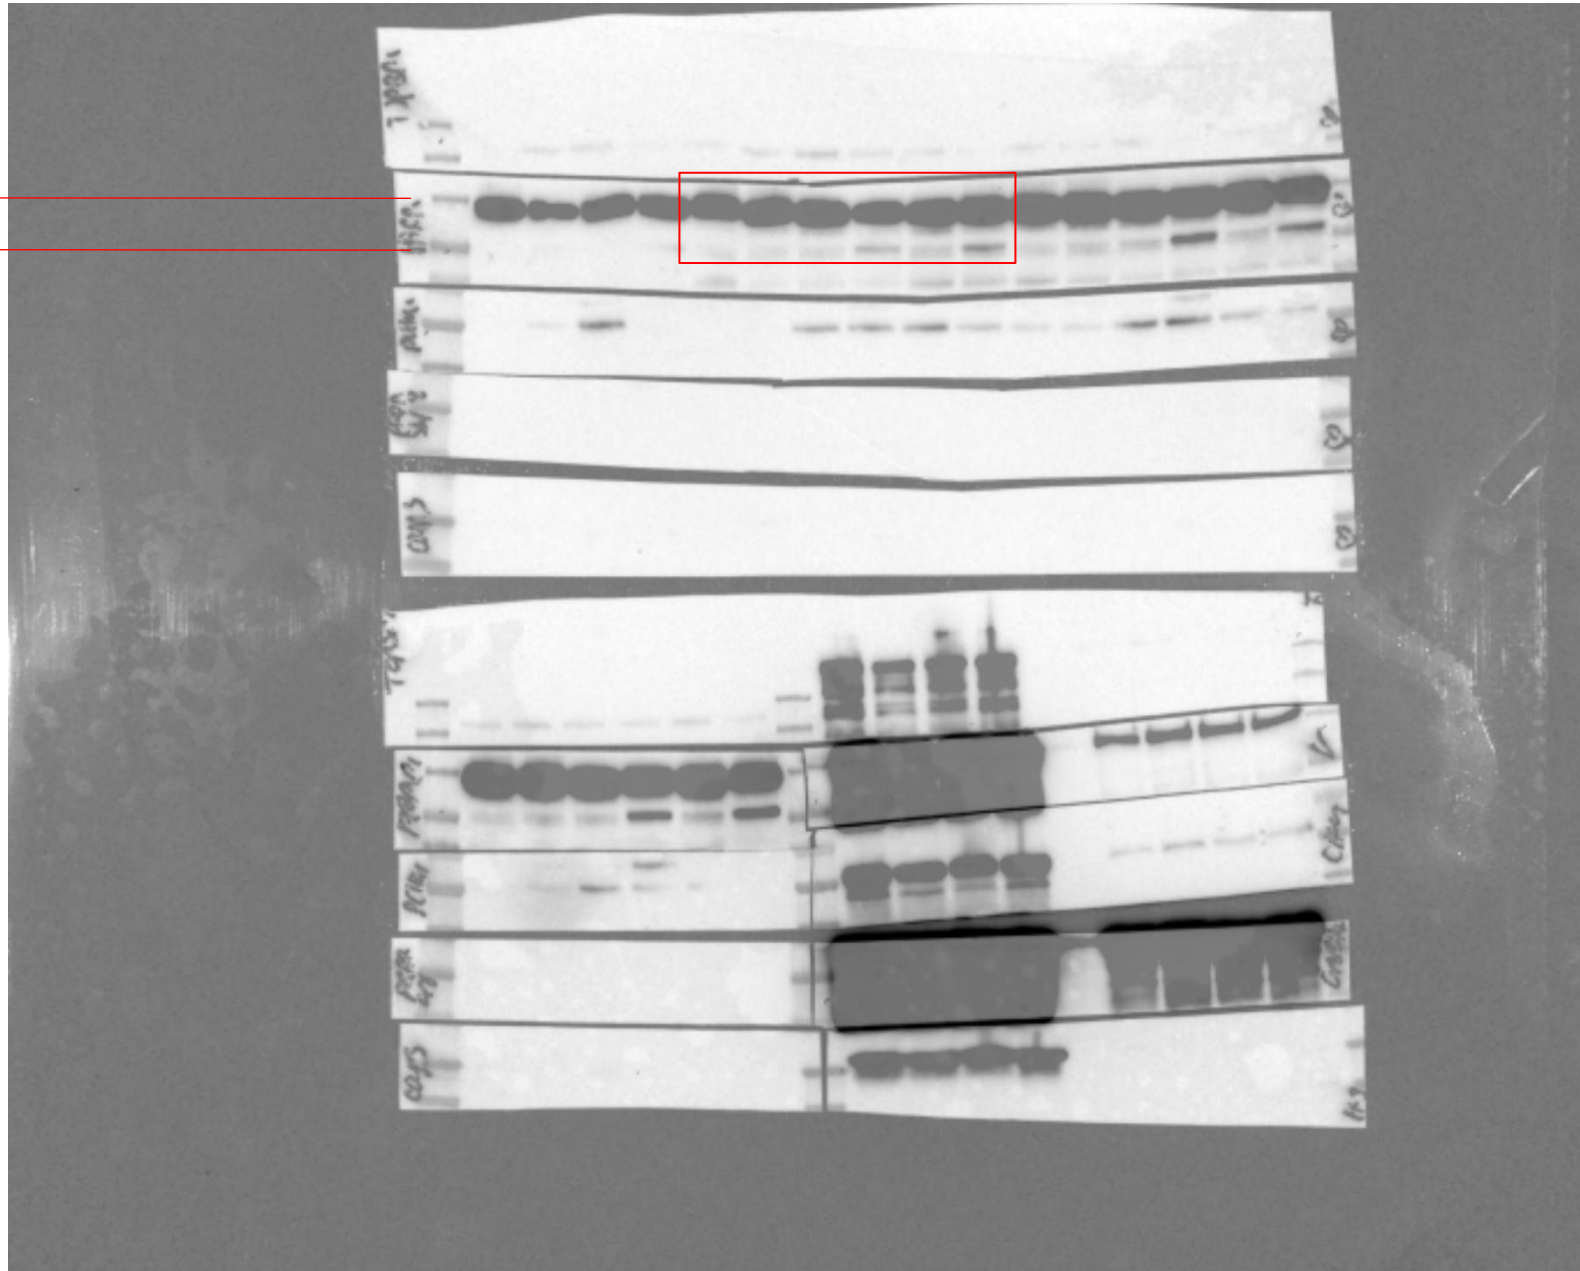



chemiluminescence for PARP1 (high -> cleaved)

PARP1

130 kDa

95 kDa

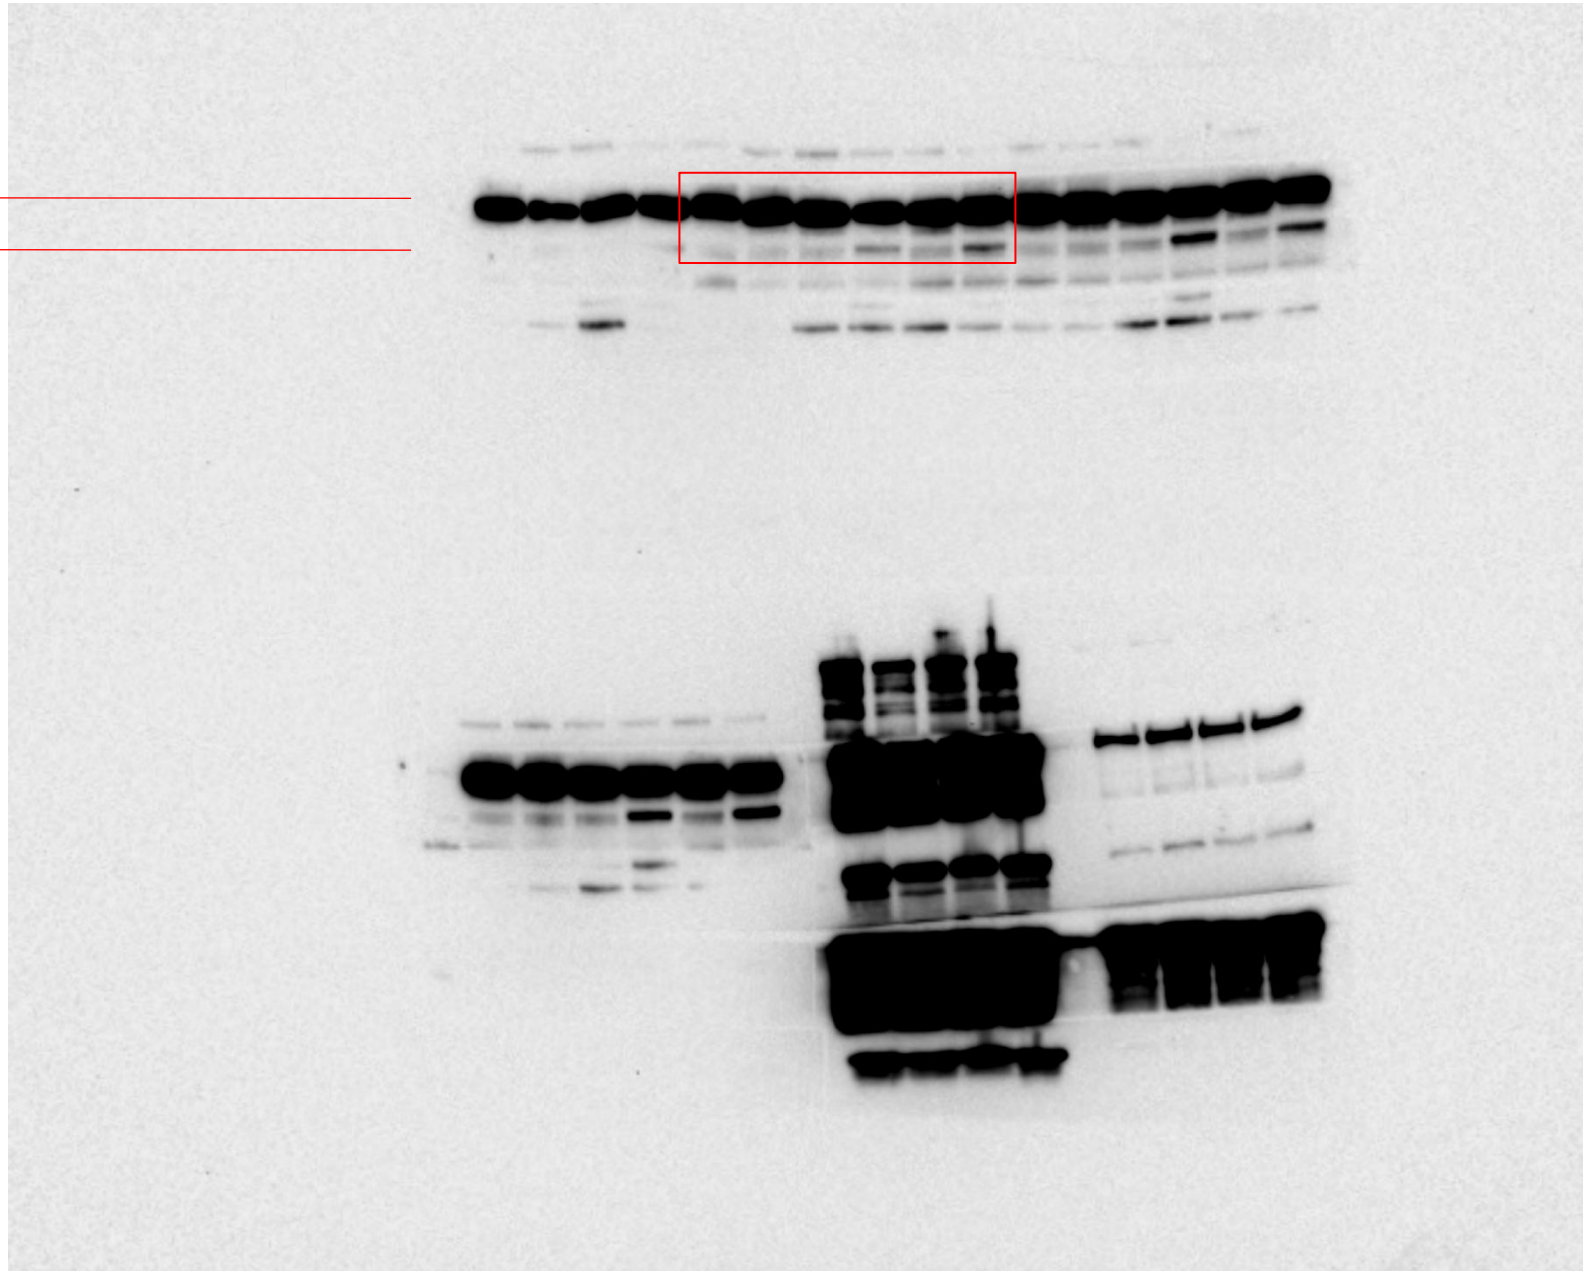

Colorimetric for PARP1

PARP1

130 kDa

95 kDa

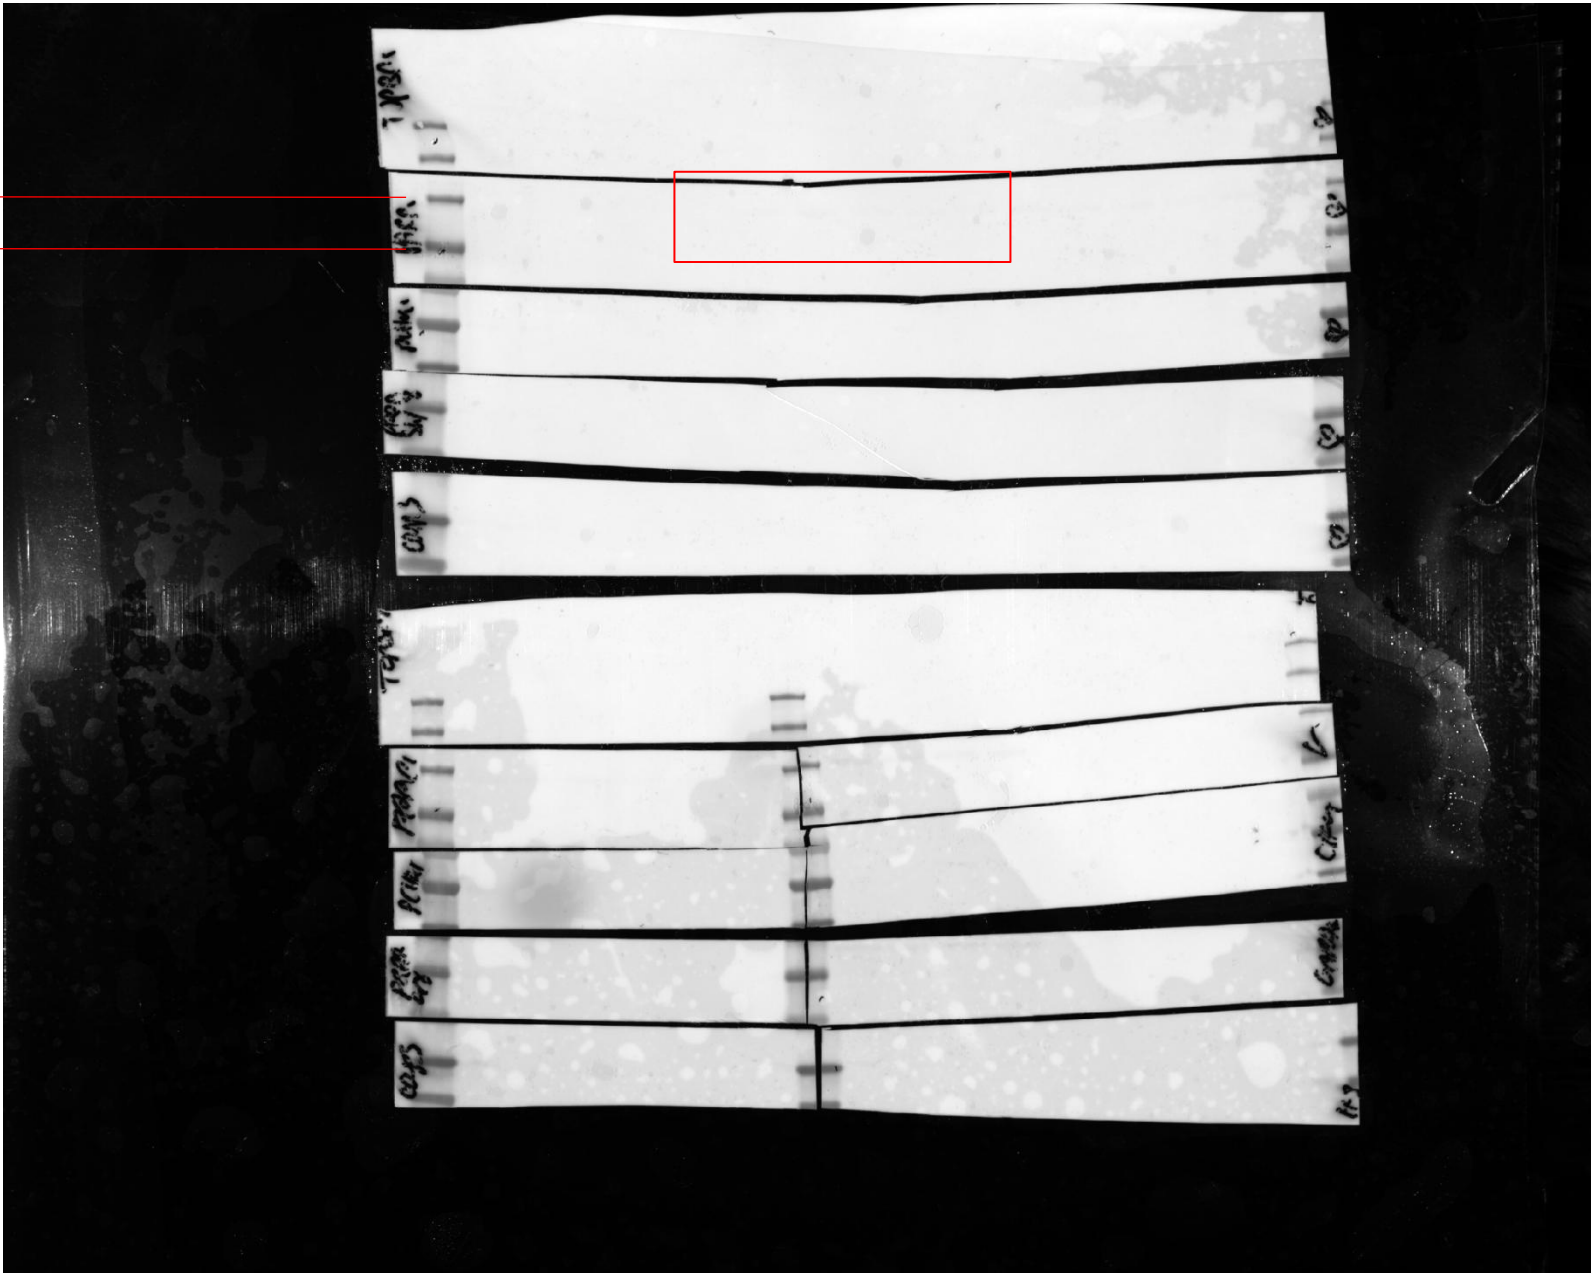

Supplement: fig4-data1 [file Fig 4C- Source Data 1.pdf › Fig 4C and D- Source Data 1/Fig 4C- Source Data 1.pdf]
