# Supplementary material for: TopBP1 biomolecular condensates as a new therapeutic target in advanced-stage colorectal cancer
Source: eLife journal article supplement (doi:10.7554/elife.106196), 2025-05-15
Supplement: fig2-data1 [file Fig2B -Source Data 1.pdf › Fig 2B, D and E- Source Data 1/Fig2B -Source Data 1.pdf]

Figure 2.B

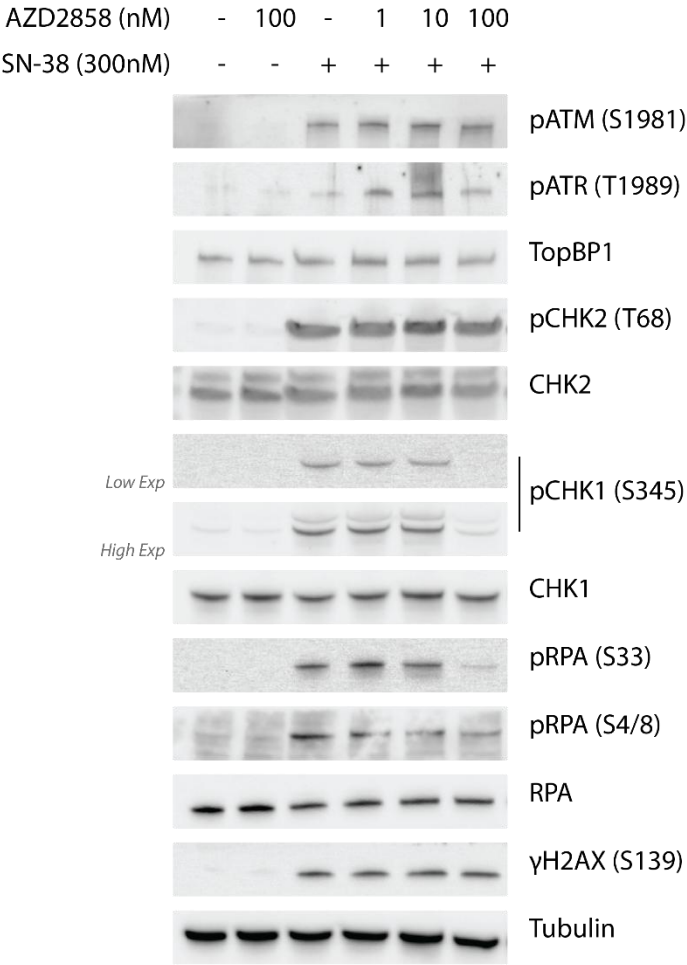

**Figure 2B, Source Data 1.** Below are the Original membranes corresponding to Figure 2B. Immunoblot of the indicated proteins after incubation of HCT116 cells with AZD2858 at the indicated concentrations and/or SN-38 (300 nM) for 2 h. The experiment was replicated 3 times, and a representative replicate is shown.

Merge chemiluminescence bands/colorimetric for CHK1, CHK2

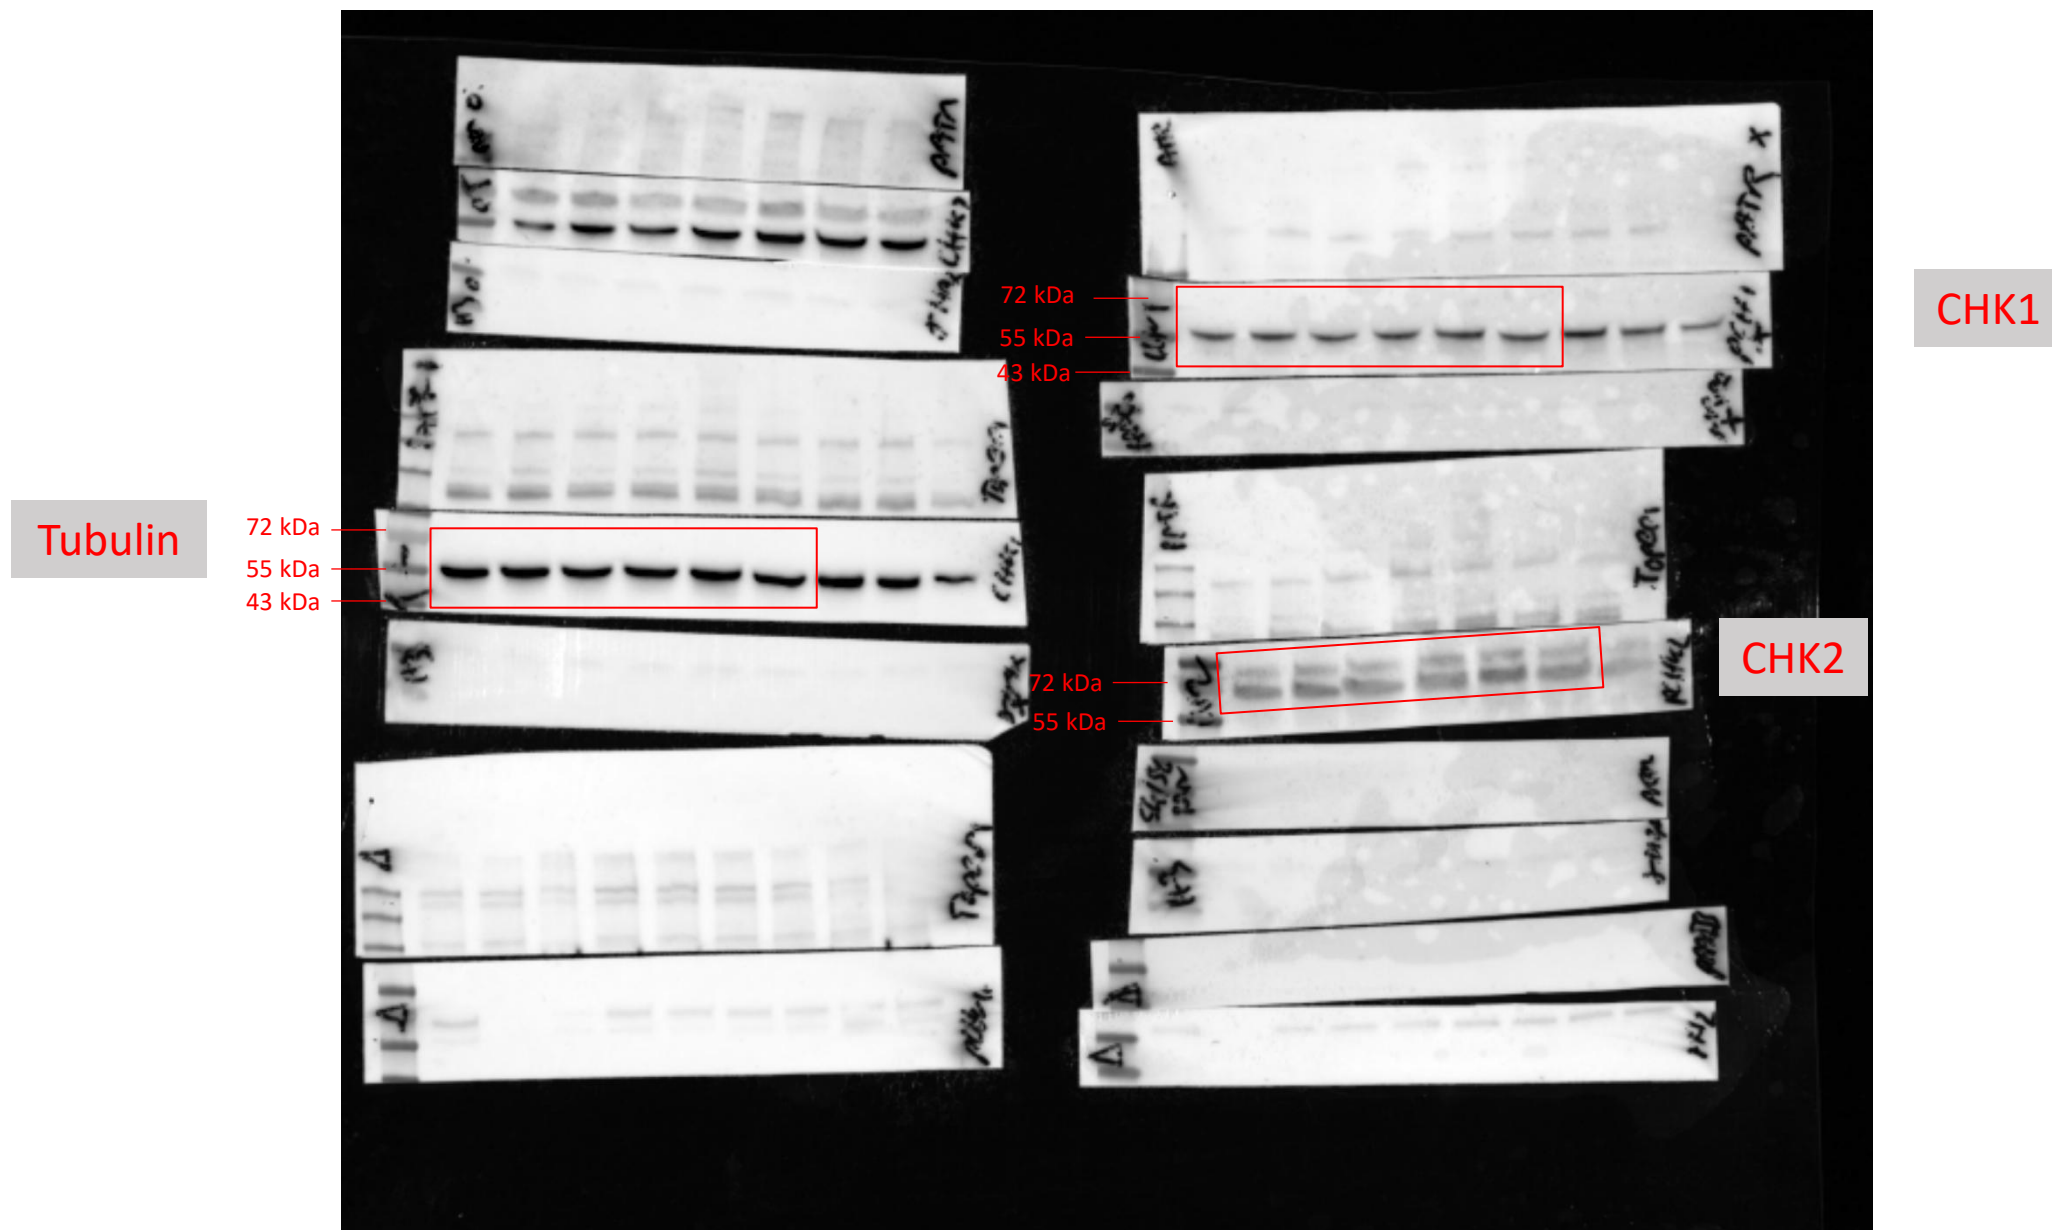

Chemiluminescence bands for CHK1 & CHK2

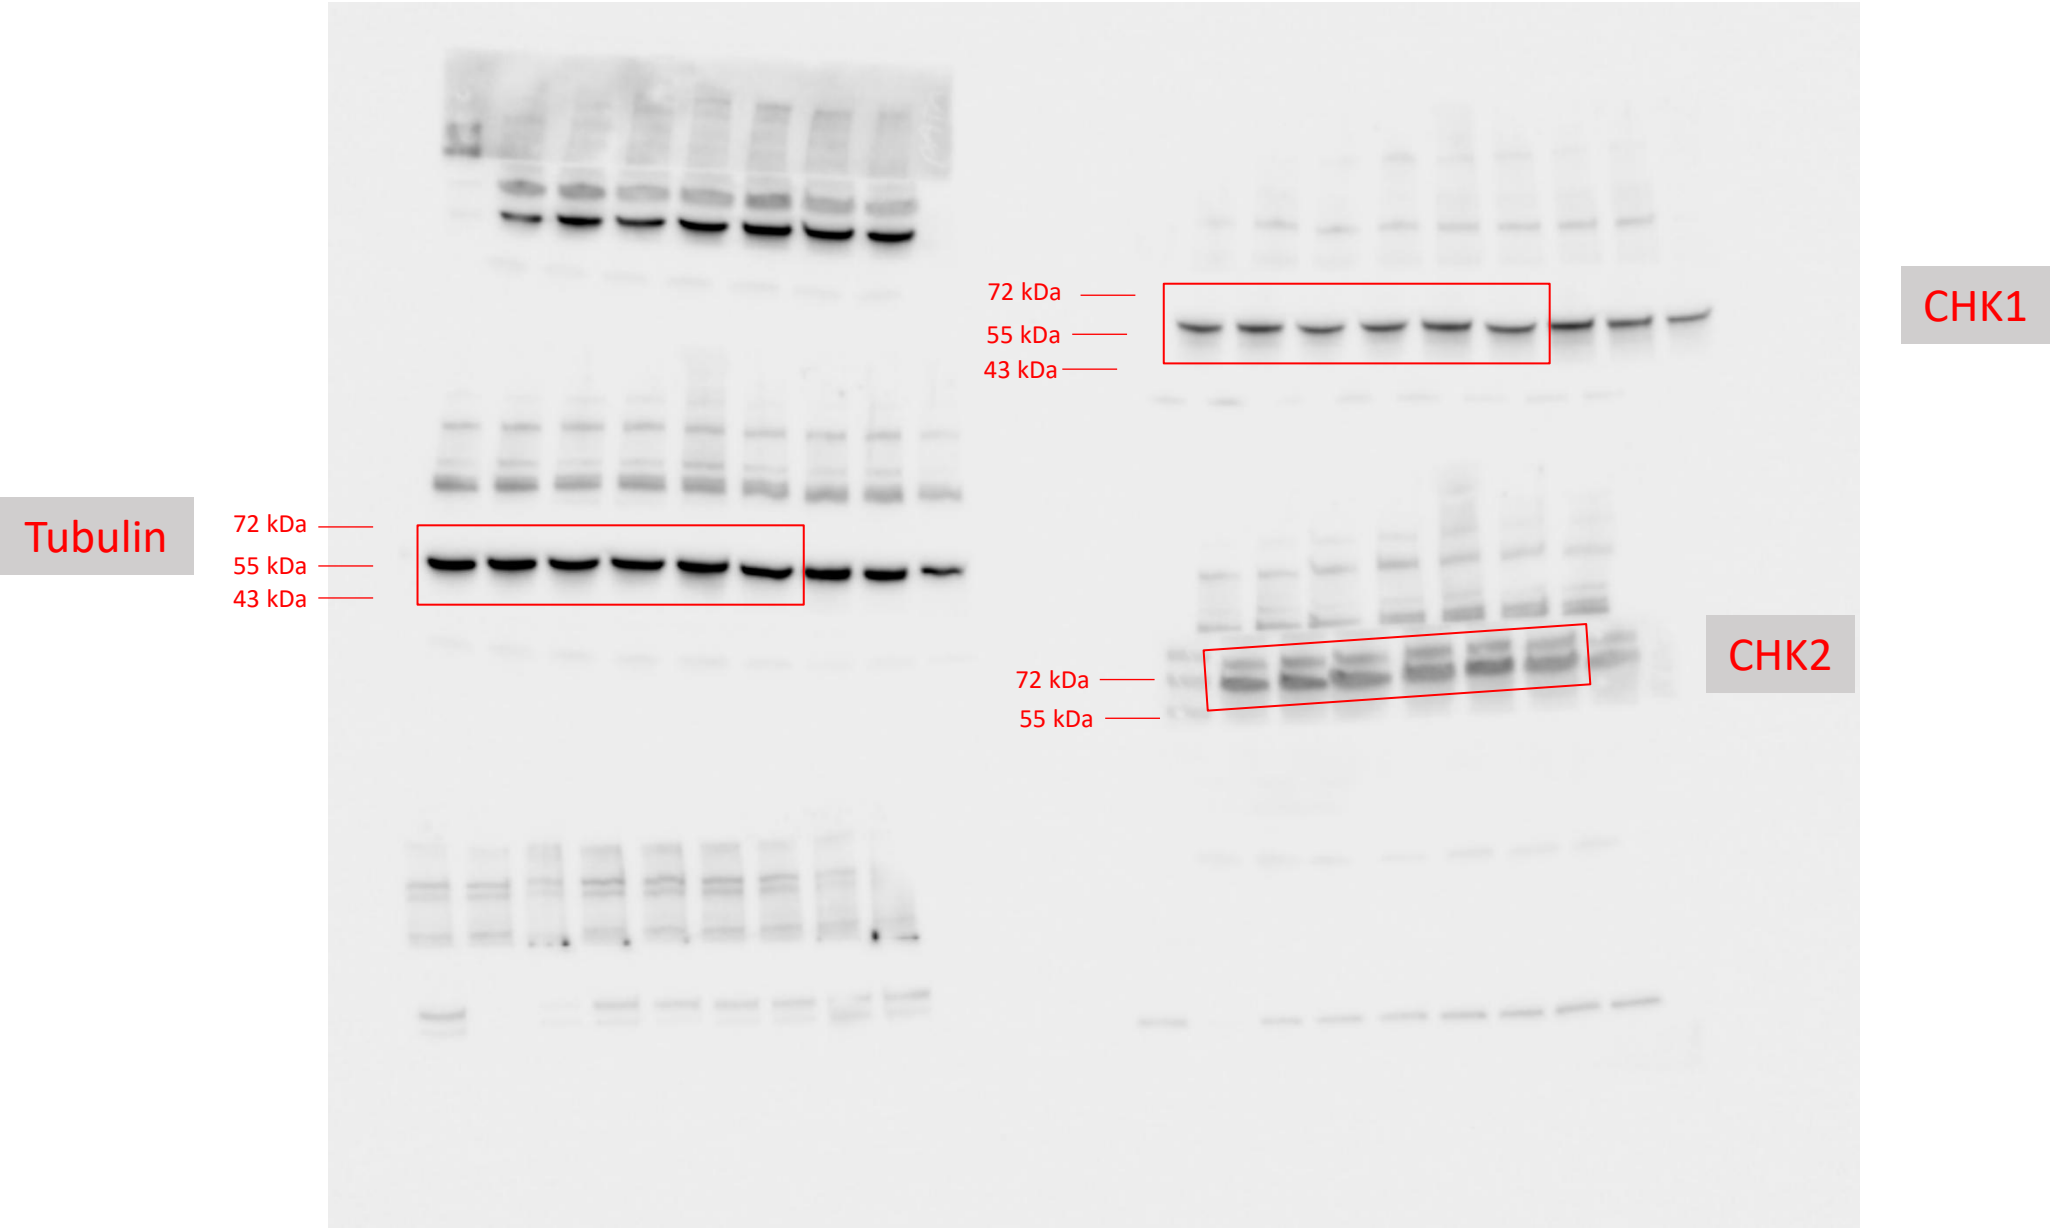

Colorimetric for CHK1, CHK2

Tubulin

72 kDa  
55 kDa  
43 kDa

72 kDa  
55 kDa  
43 kDa

CHK1

CHK2

# Merge chemiluminescence bands/colorimetric for pATM, TopBP1, RPA

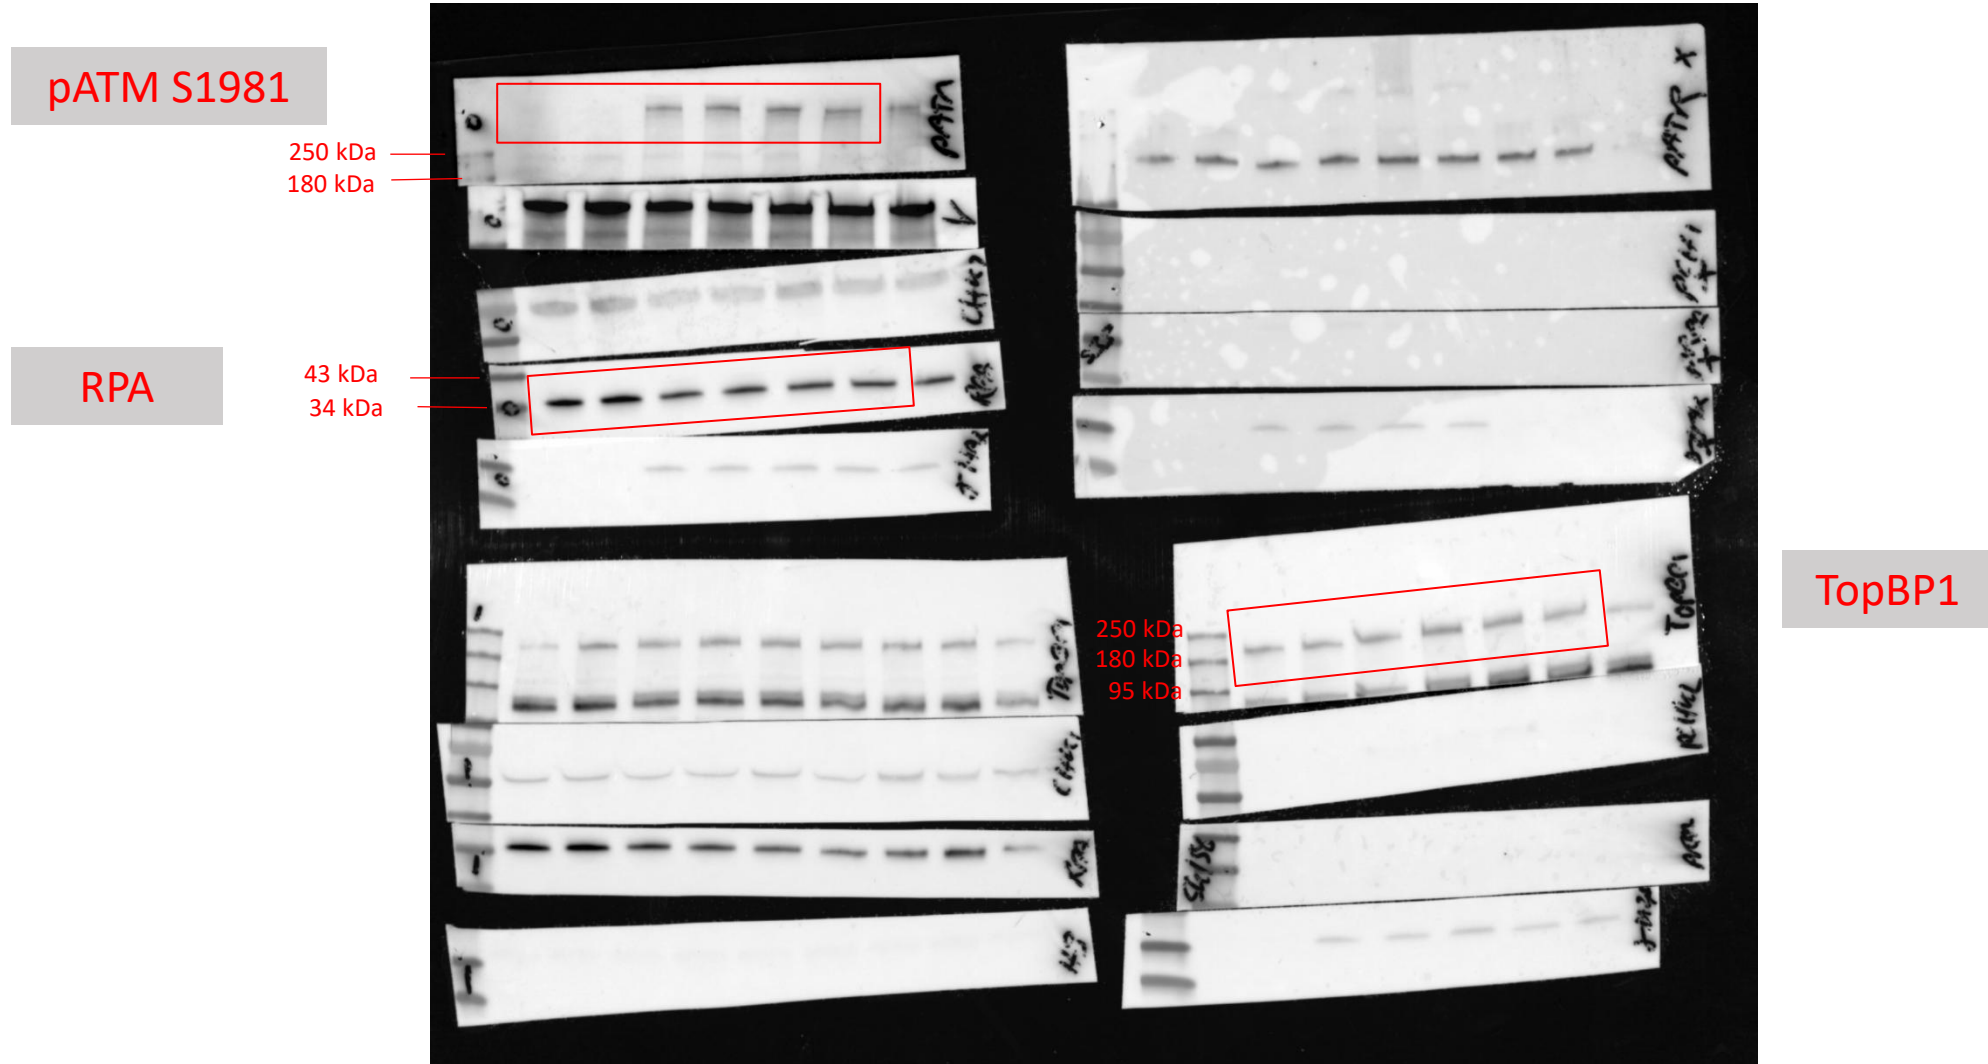

Chemiluminescence bands for pATM, TopBP1, RPA

pATM S1981

250 kDa  
180 kDa

RPA

43 kDa  
34 kDa

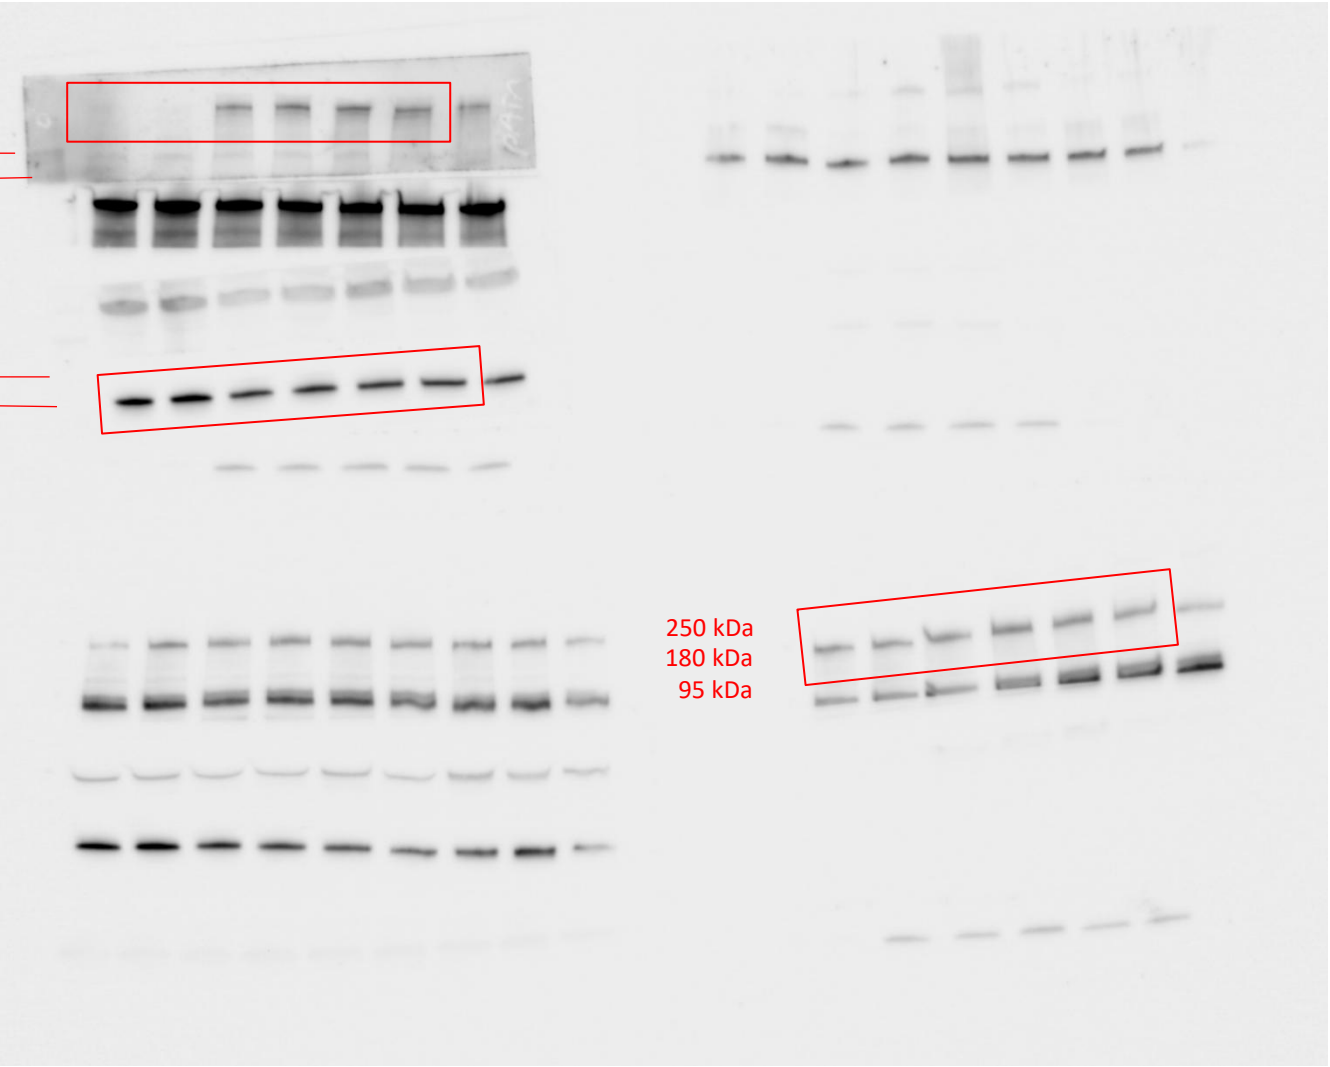

TopBP1

## Colorimetric for pATM, TopBP1, RPA

pATM S1981

250 kDa  
180 kDa

# RPA

43 kDa  
34 kDa

TopBP1

250 kDa  
180 kDa  
95 kDa







Chemiluminescence bands for pATR &  $\gamma$ H2AX

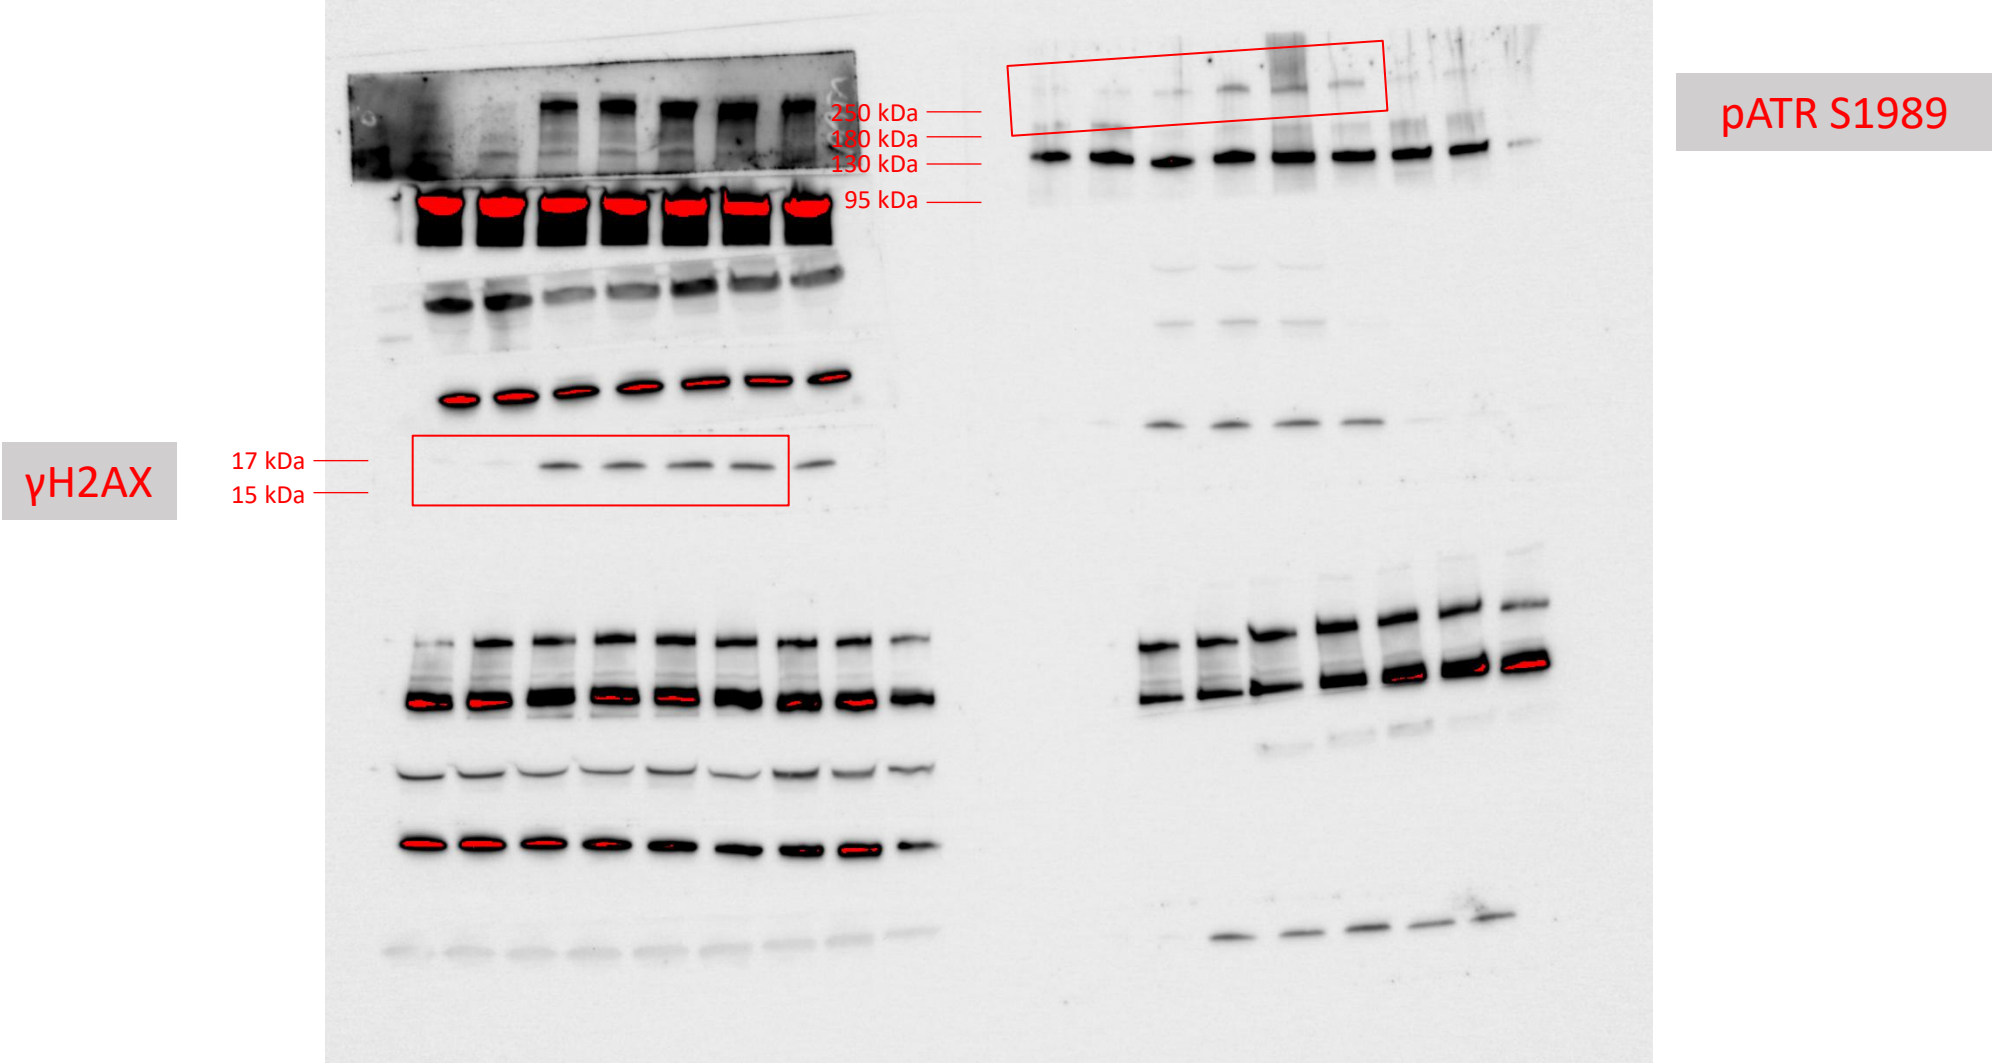

## Colorimetric for pATR & γH2AX

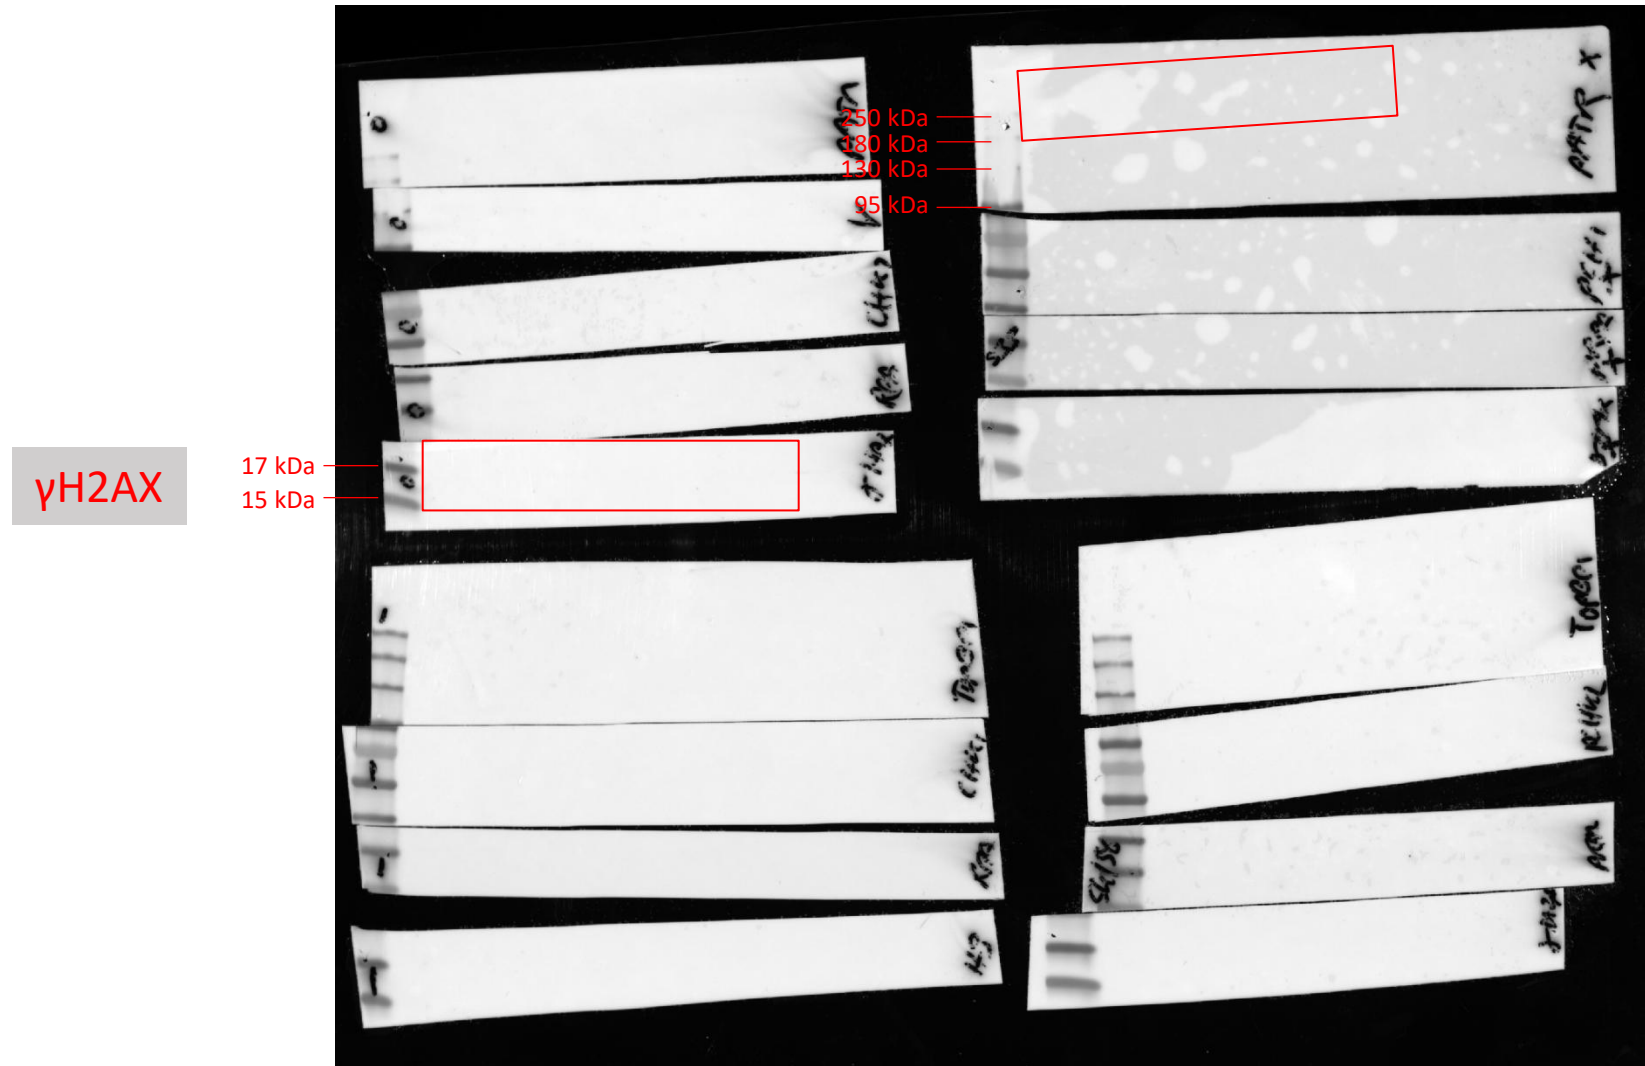

pATR S1989

Merge chemiluminescence bands/colorimetric for pRPA32 S4/8, pCHK1 S345, pCHK2 T68

pCHK1 (S345)

pRPA32 (S4/8)

pCHK2 (T68)

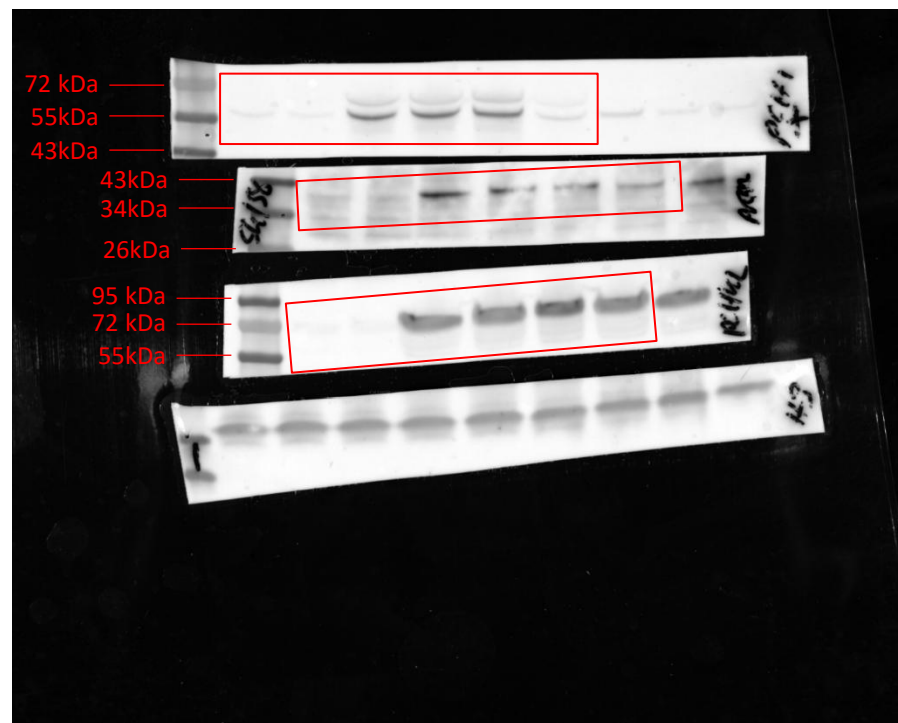

# Chemiluminescence bands for pRPA32 S4/8, pCHK1 S345, pCHK2 T68

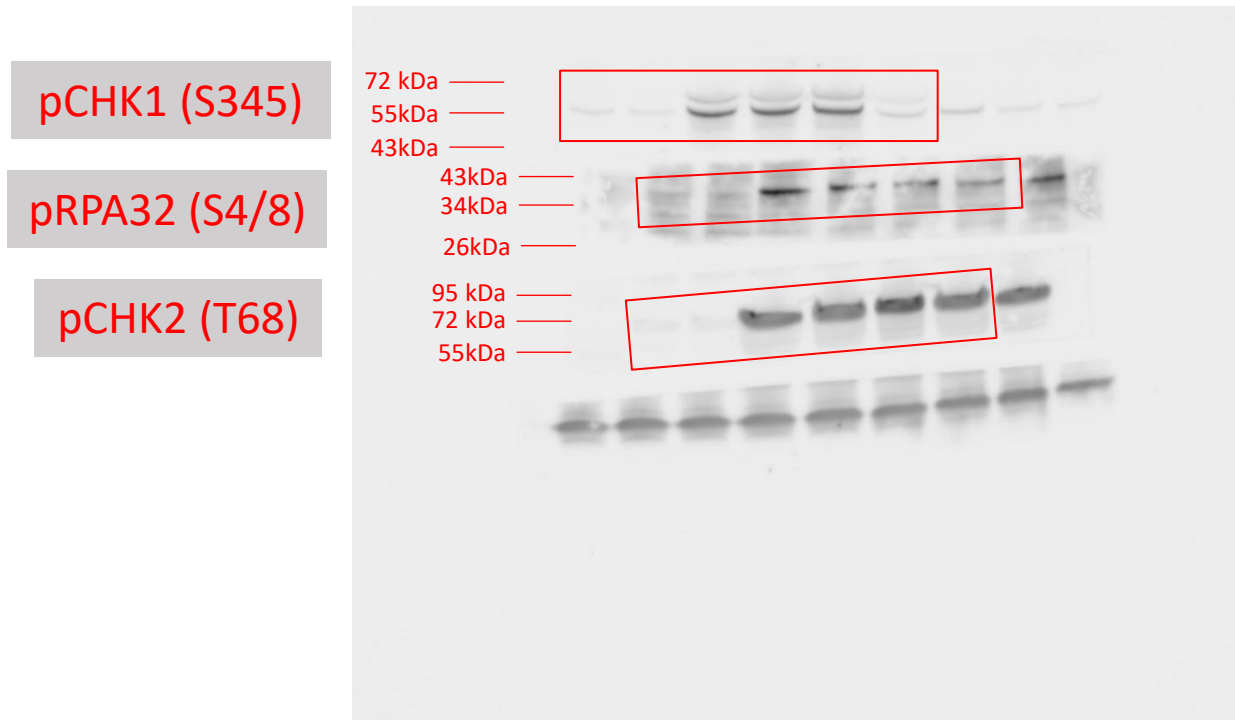

Colorimetric for pRPA32 S4/8, pCHK1 S345, pCHK2 T68

pCHK1 (S345)

pRPA32 (S4/8)

pCHK2 (T68)

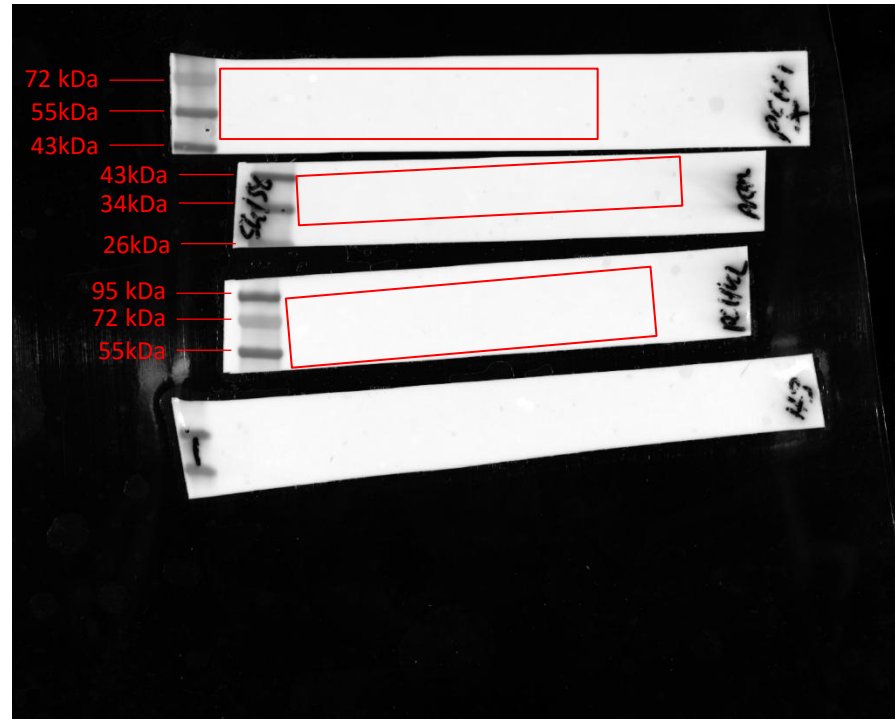

Colorimetric for pRPA32 S33, pCHK1 S345 low exposure

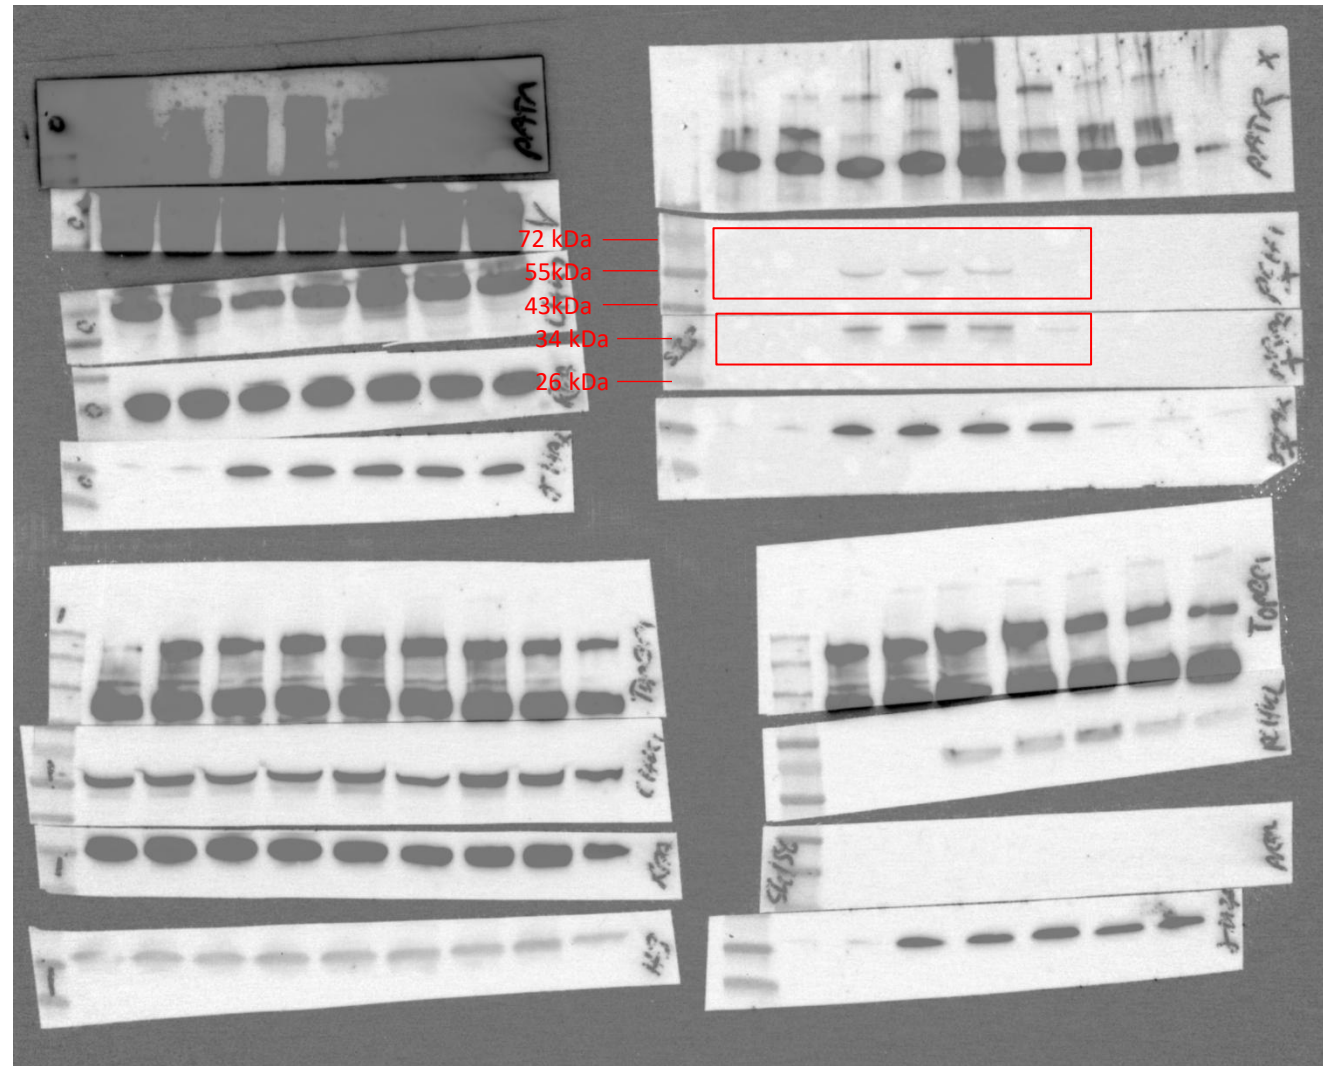

pCHK1 (S345)

pRPA32 (S33)



# Chemiluminescence bands for pRPA32 S33, pCHK1 S345 low exposure

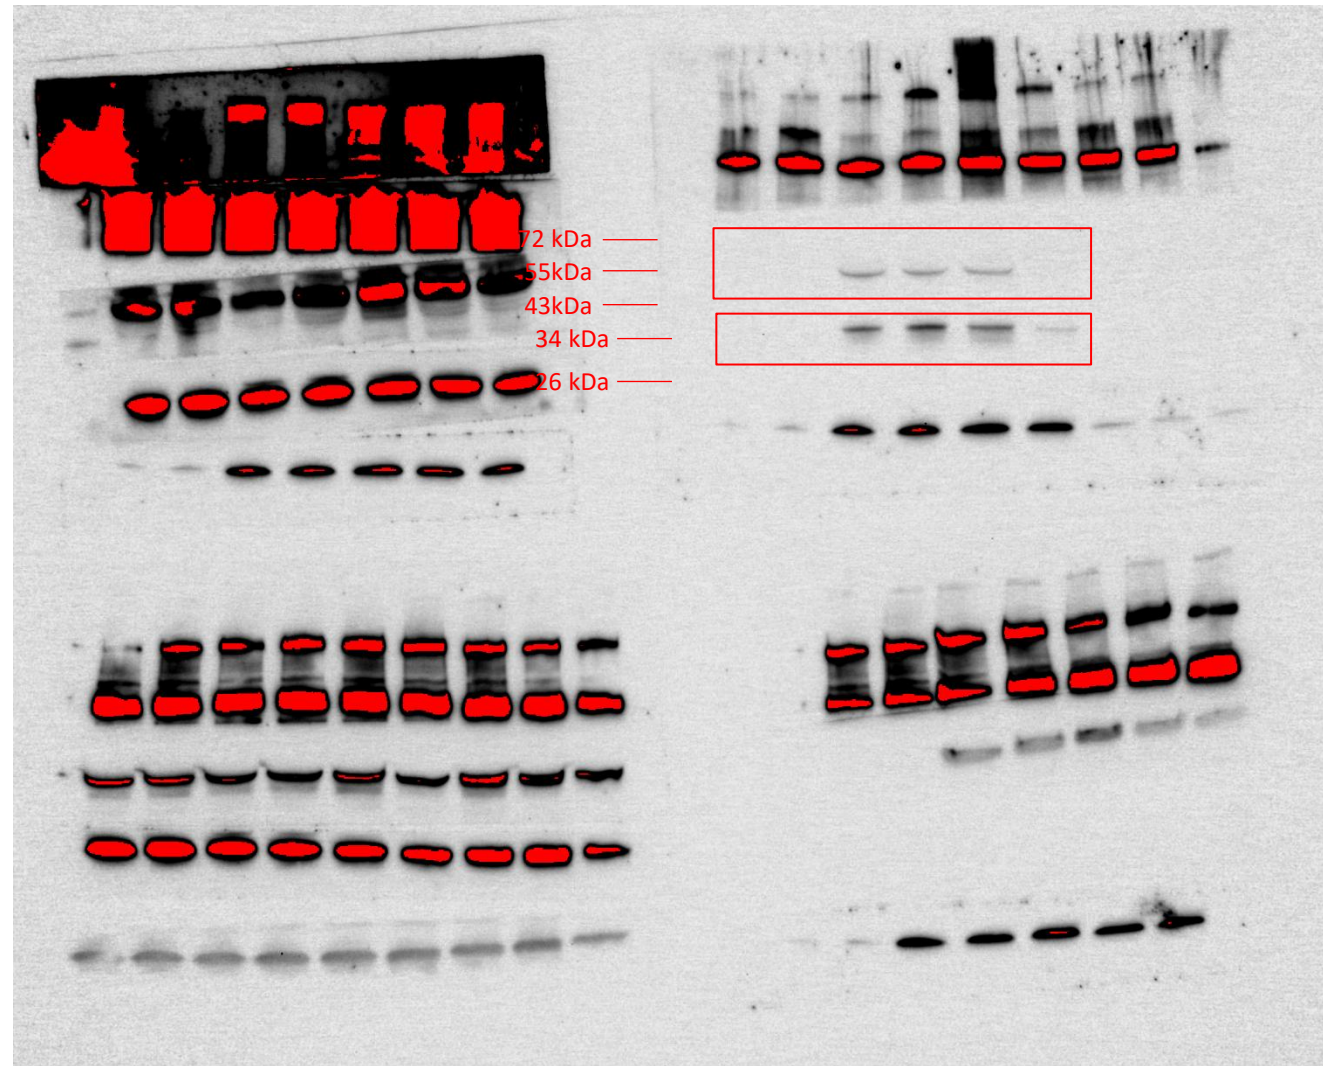

Colorimetric for pRPA32 S33, pCHK1 S345 low exposure

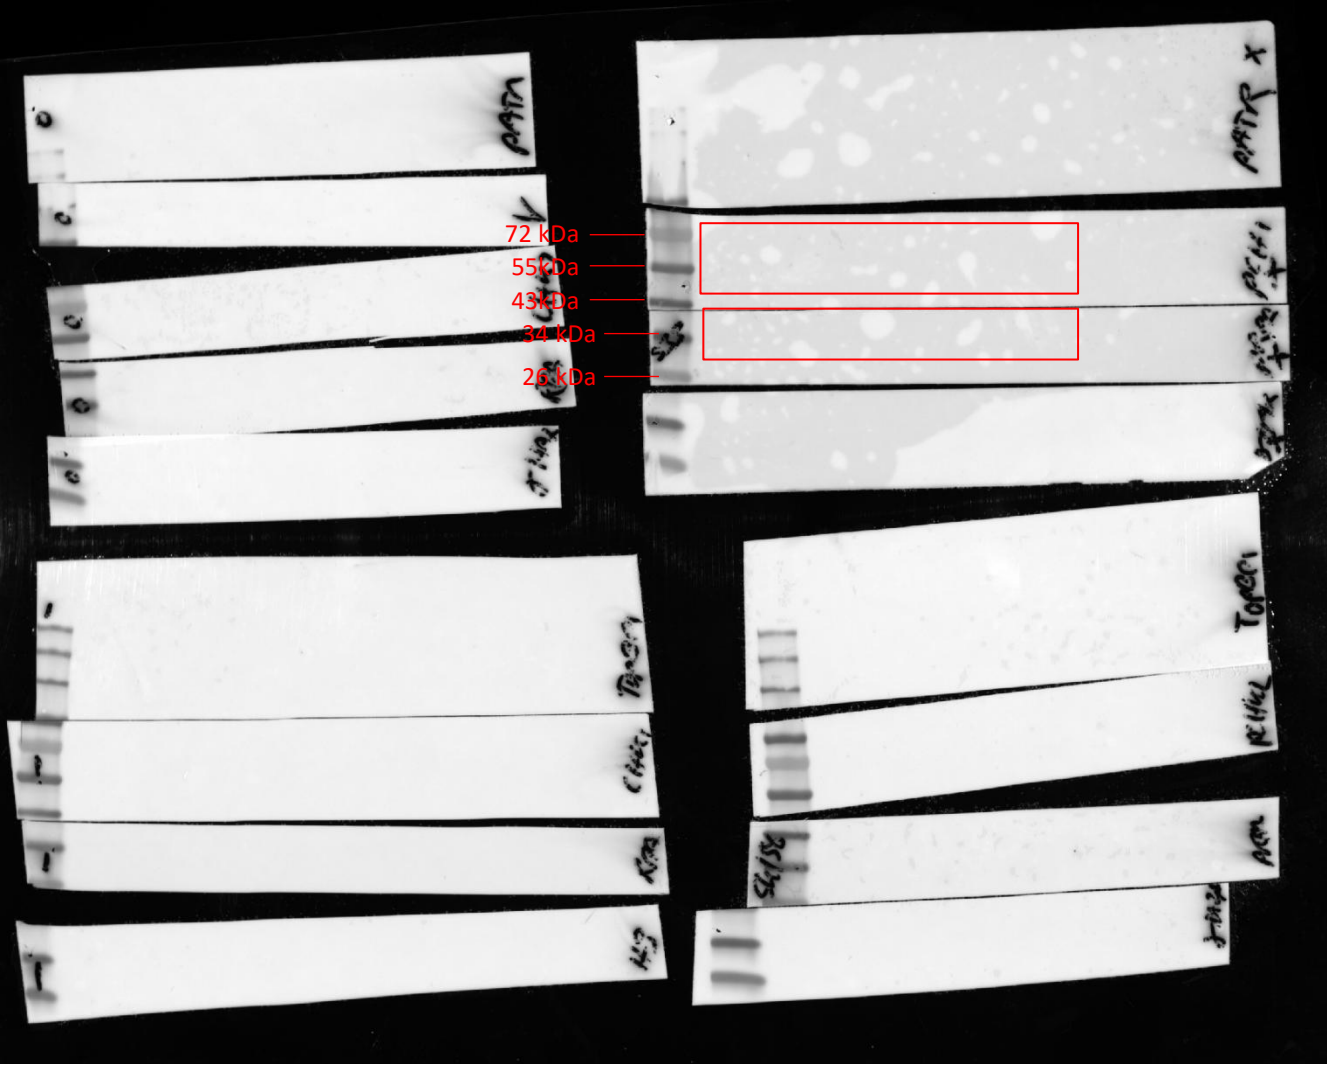

pCHK1 (S345)

pRPA32 (S33)
