# Supplementary material for: TopBP1 biomolecular condensates as a new therapeutic target in advanced-stage colorectal cancer
Source: eLife journal article supplement (doi:10.7554/elife.106196), 2025-05-15

**Figure 2.D**

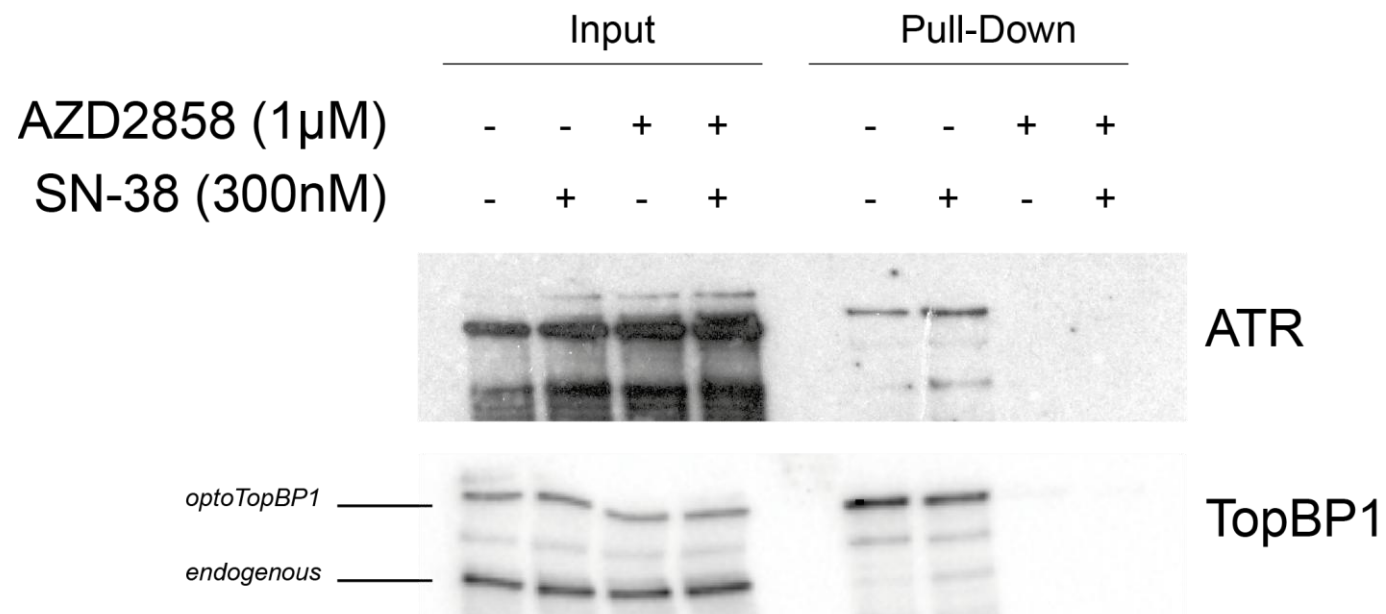

**Figure 2D, Source Data 1.** Below are the Original membranes corresponding to Figure 2D.

Immunoblotting of TopBP1 and ATR isolated with streptavidin beads from optoTopBP1-expressing cells incubated with doxycycline for 16 h to induce optoTopBP1 expression, and also with AZD2858 (1  $\mu$ M) and/or SN-38 (300 nM) for the last 2 h. Biotin was added to the medium in all conditions for the last 30 min. Bands that correspond to endogenous and optoTopBP1 proteins are indicated with one and two stars (\* and \*\*), respectively

## Chemiluminescence bands for ATR

ATR

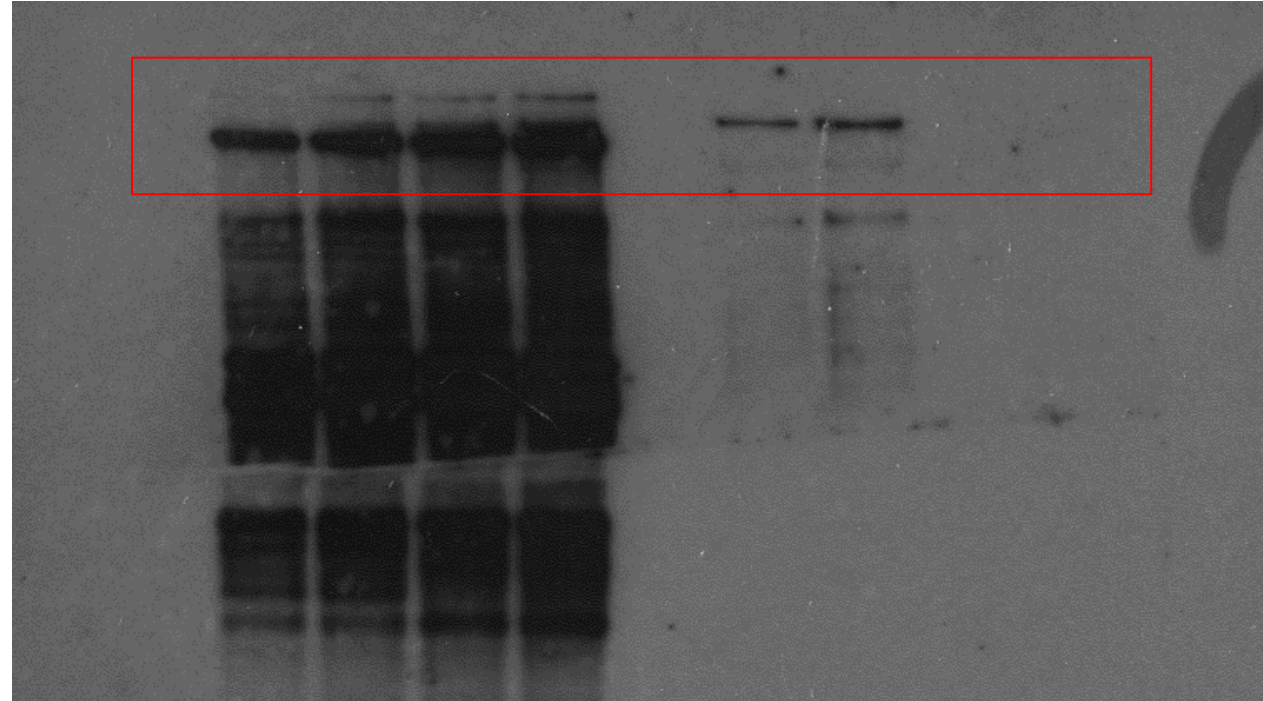

Colorimetric for TopBP1

TopBP1

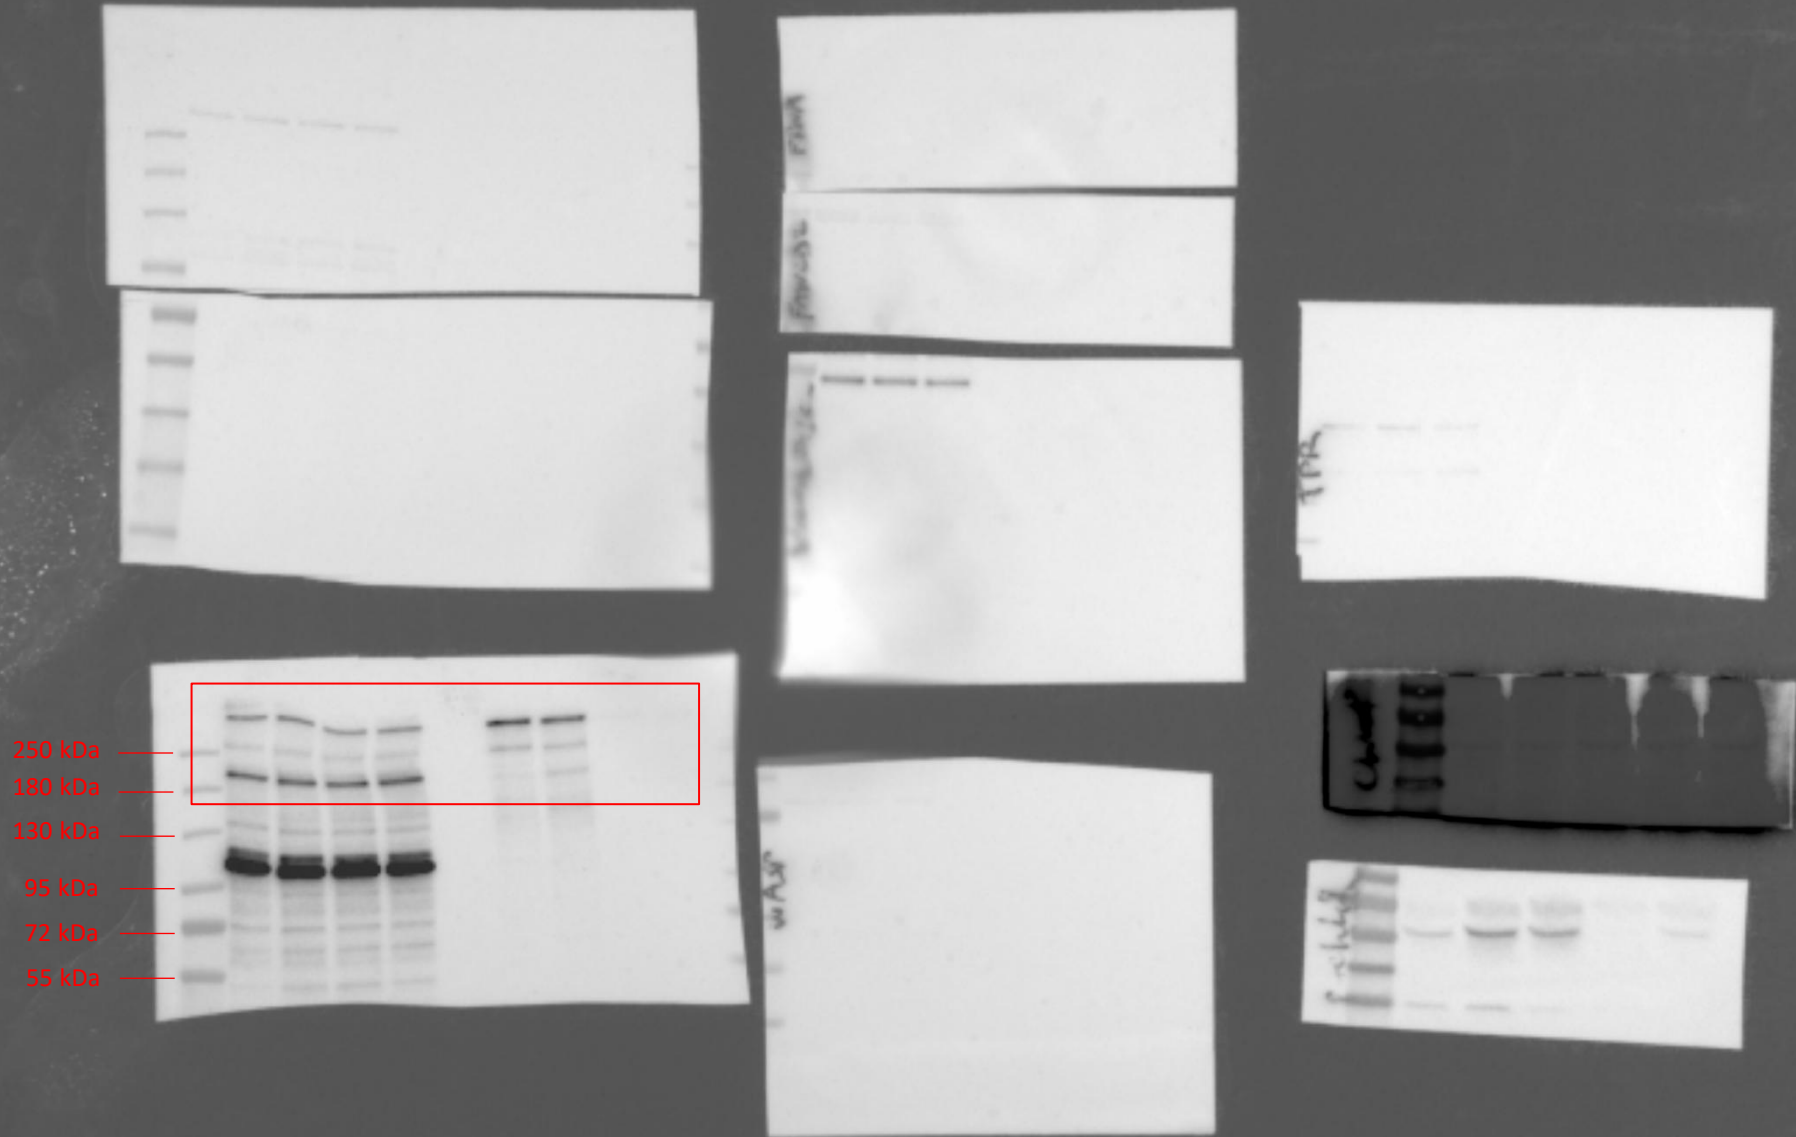

Chemiluminescence bands for TopBP1

TopBP1

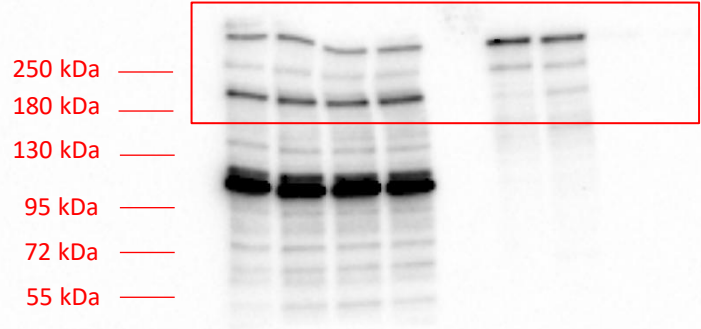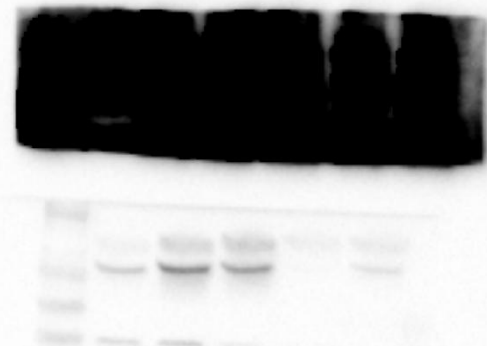

## Colorimetric for ToPBP1

TopBP1

250 kDa —  
180 kDa —  
130 kDa —  
95 kDa —  
72 kDa —  
55 kDa —

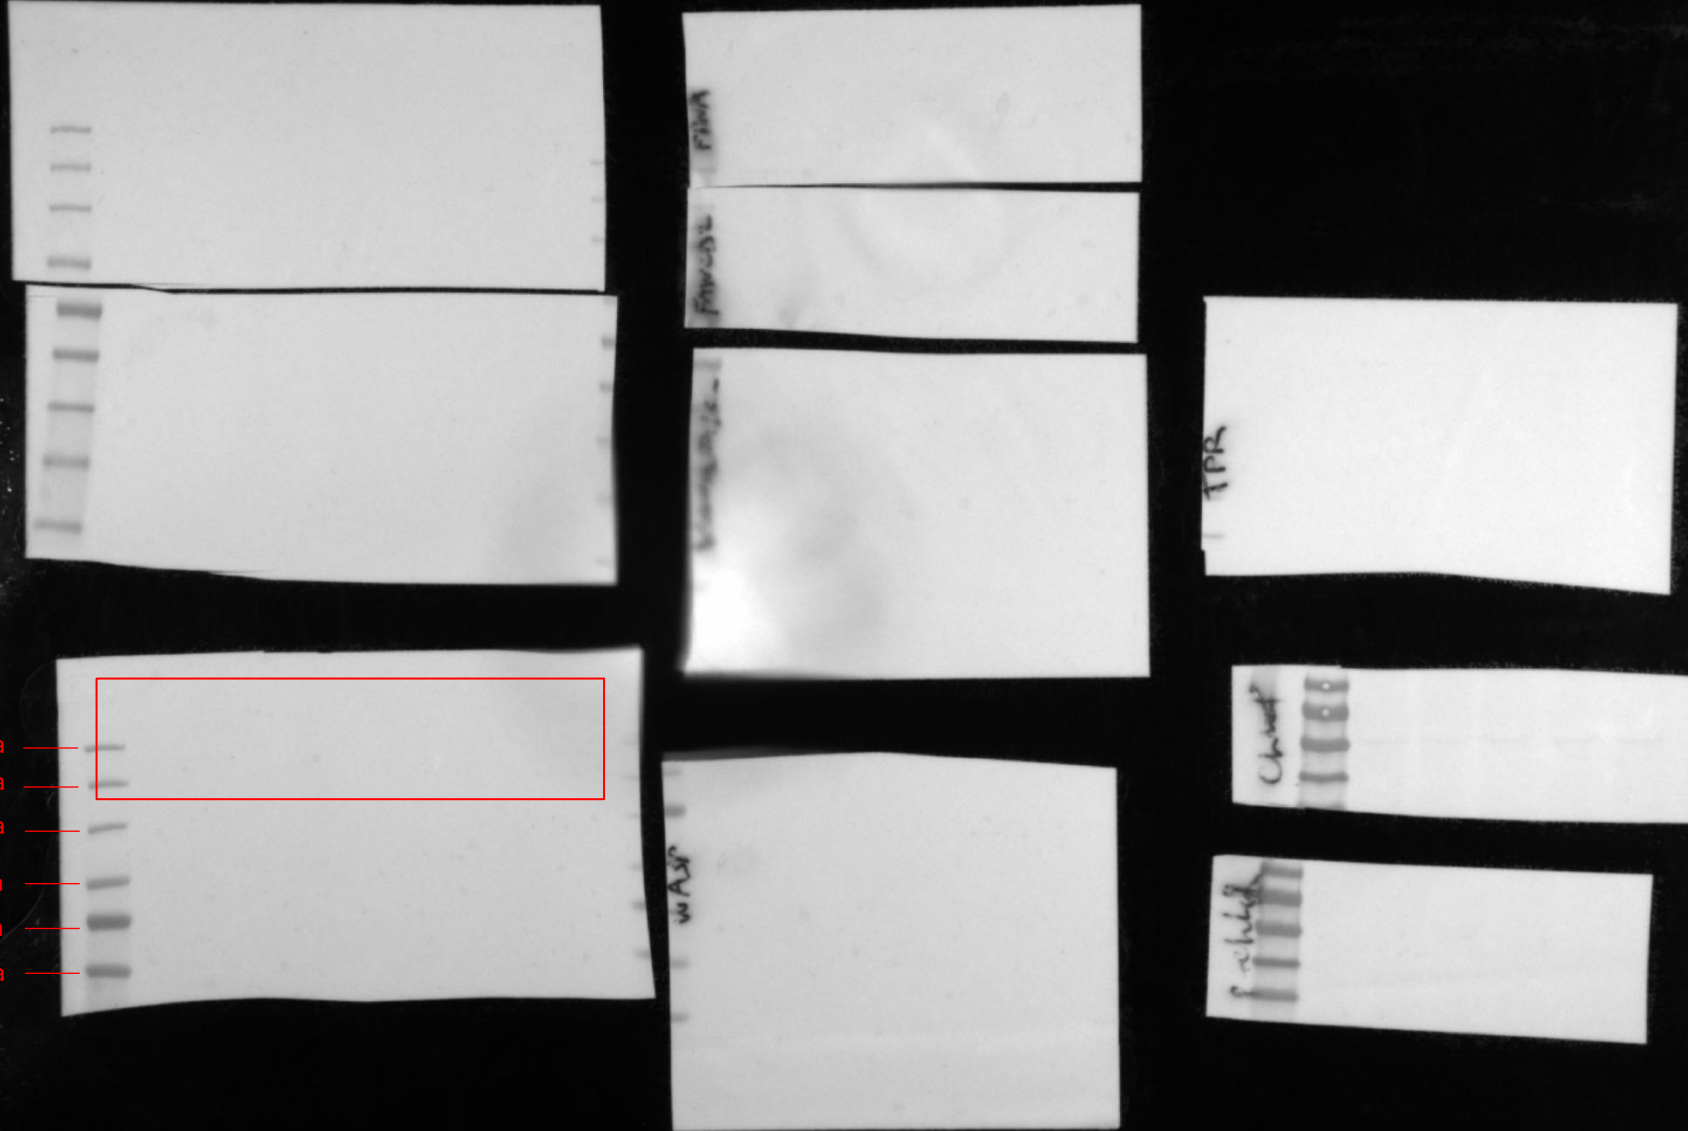

Supplement: fig2-data1 [file Fig2D -Source Data 1.pdf › Fig 2B, D and E- Source Data 1/Fig2D -Source Data 1.pdf]
