# Supplementary material for: TopBP1 biomolecular condensates as a new therapeutic target in advanced-stage colorectal cancer
Source: eLife journal article supplement (doi:10.7554/elife.106196), 2025-05-15
Supplement: fig2-data3 [file DDR inhibition AZD+FOLFIRI 3 doses 20h HCT116 n = 3.xlsx]

## Sheet: HCT116 pChk1 20h
										20h TT
										% pChk1 positive cells
											2024-02-27	2024-02-15	2024-03-15	µ	S.D	S.E.M
										NT	0.091446	0.076731	0.0805133	0.0828968	0.00764154	0.00569948
										AZD 100 nM	0.0925797	0.0810027	0.106246	0.0932762	0.0126362	0.00864673
										AZD 500 nM	0.0919956	0.0936051	0.109827	0.0984759	0.00986323	0.0075674
										AZD 1000 nM	0.140992	0.120614	0.0989329	0.12018	0.0210331	0.0141645
										FOLFIRI 1/2	0.715674	0.735037	0.80969	0.753467	0.0496435	0.0374818
										AZD 100 nM + FOLFIRI	0.314842	0.466847	0.503526	0.428405	0.100044	0.0757088
										AZD 500 nM + FOLFIRI	0.327061	0.376778	0.541768	0.415202	0.112393	0.0843772
										AZD 1000 nM + FOLFIRI	0.344796	0.415302	0.465463	0.40852	0.060619	0.0424831

## Sheet: HCT116 gH2AX 20h
										20h TT
										% gH2AX positive cells
											2024-02-27	2024-02-15	2024-03-15	µ	S.D	S.E.M
										NT	0.011342	0.03215	0.00941988	0.0176373	0.0126051	0.00967514
										AZD 100 nM	0.0174578	0.055678	0.0299842	0.0343733	0.0194845	0.0142031
										AZD 500 nM	0.0249194	0.0564643	0.024621	0.0353349	0.0182992	0.0140863
										AZD 1000 nM	0.0272991	0.0357995	0.0378376	0.0336454	0.00558975	0.00423088
										FOLFIRI 1/2	0.743876	0.734709	0.80334	0.760642	0.0372609	0.0284656
										AZD 100 nM + FOLFIRI	0.816622	0.748346	0.861491	0.80882	0.0569744	0.0403156
										AZD 500 nM + FOLFIRI	0.831072	0.73305	0.849609	0.804577	0.0626334	0.0476844
										AZD 1000 nM + FOLFIRI	0.796565	0.73924	0.846457	0.794087	0.0536513	0.0365649

## Sheet: HCT116 pATR 20h
										20h TT
										% pATR positive cells
											2024-02-27	2024-02-15	2024-03-15	µ	S.D	S.E.M
										NT	0.13907	0.129033	0.131291	0.133131	0.00526572	0.00395933
										AZD 100 nM	0.0854852	0.100803	0.124823	0.103704	0.0198289	0.0140798
										AZD 500 nM	0.0742079	0.126066	0.184305	0.128193	0.0550795	0.0374082
										AZD 1000 nM	0.115463	0.170661	0.179099	0.155074	0.0345632	0.0264078
										FOLFIRI 1/2	0.489174	0.406679	0.416666	0.437506	0.0450233	0.0344451
										AZD 100 nM + FOLFIRI	0.34554	0.482358	0.40085	0.409583	0.0688255	0.0485168
										AZD 500 nM + FOLFIRI	0.337732	0.508646	0.440972	0.429116	0.0860717	0.0609232
										AZD 1000 nM + FOLFIRI	0.339606	0.42805	0.425758	0.397805	0.0504146	0.0387991
														manip du 03 15 24 descendre NT à 15%
														% pATR positive cells
														NT	0.131291
														AZD2858 100 nM	0.124823
														AZD2858 500 nM	0.184305
														AZD2858 1000 nM	0.179099
														FOLFIRI 1/2	0.416666
														AZD2858 100 nM + FOLFIRI	0.40085
														AZD2858 500 nM + FOLFIRI	0.440972
														AZD2858 1000 nM + FOLFIRI	0.425758

## Sheet: HCT116 pChk2 20h
										20h TT
										% pChk2 positive cells
											2024-02-27	2024-02-15	2024-03-15	µ	S.D	S.E.M
										NT	0.167391	0.21764	0.228914	0.204648	0.0327545	0.0248383
										AZD 100 nM	0.162514	0.175143	0.178427	0.172028	0.00840152	0.00634281
										AZD 500 nM	0.201523	0.144319	0.179306	0.175049	0.0288382	0.0204866
										AZD 1000 nM	0.223943	0.160243	0.22347	0.202552	0.0366417	0.0282062
										FOLFIRI 1/2	0.461517	0.550132	0.505905	0.505851	0.0443074	0.0295562
										AZD 100 nM + FOLFIRI	0.173345	0.217235	0.327745	0.239442	0.0795593	0.0588688
										AZD 500 nM + FOLFIRI	0.220167	0.306185	0.423516	0.316623	0.102075	0.0712622
										AZD 1000 nM + FOLFIRI	0.224906	0.306514	0.403546	0.311655	0.0894307	0.0612603
														manip du 03 15 24 monter FOLFIRI à 50%
														% pChk2 positive cells
														NT	0.228914
														AZD2858 100 nM	0.178427
														AZD2858 500 nM	0.179306
														AZD2858 1000 nM	0.22347
														FOLFIRI 1/2	0.505905
														AZD2858 100 nM + FOLFIRI	0.327745
														AZD2858 500 nM + FOLFIRI	0.423516
														AZD2858 1000 nM + FOLFIRI	0.403546

## Sheet: HCT116 pATM 20h
										20h TT
										% pATM positive cells
											2024-02-27	2024-02-15	2024-03-15	µ	S.D	S.E.M
										NT	0.168623	0.193237	0.153655	0.171838	0.0199862	0.0142659
										AZD 100 nM	0.114317	0.0878628	0.186729	0.129636	0.0511825	0.0380618
										AZD 500 nM	0.135648	0.096188	0.298225	0.176687	0.107088	0.0810253
										AZD 1000 nM	0.221415	0.235064	0.35366	0.270046	0.0727324	0.0557424
										FOLFIRI 1/2	0.576728	0.476483	0.555412	0.536207	0.0528094	0.0398162
										AZD 100 nM + FOLFIRI	0.509767	0.638708	0.630674	0.593049	0.0722367	0.0555218
										AZD 500 nM + FOLFIRI	0.634932	0.649652	0.748931	0.677838	0.0620064	0.0473951
										AZD 1000 nM + FOLFIRI	0.676048	0.636085	0.785729	0.699288	0.0774815	0.0576277
														manip 03 15 2024 monter FOLFIRI à 50%
														% pATM positive cells
														NT	0.153655
														AZD2858 100 nM	0.186729
														AZD2858 500 nM	0.298225
														AZD2858 1000 nM	0.35366
														FOLFIRI 1/2	0.555412
														AZD2858 100 nM + FOLFIRI	0.630674
														AZD2858 500 nM + FOLFIRI	0.748931
														AZD2858 1000 nM + FOLFIRI	0.785729

## Sheet: HCT116 pP53 20h
										20h TT
										% pP53 positive cells
											2024-02-27	2024-02-15	2024-03-15	µ	S.D	S.E.M
										NT	0.0141966	0.0116404	0.0151861	0.0136744	0.00182966	0.001356
										AZD 100 nM	0.0228361	0.00869597	0.0114236	0.0143186	0.0075014	0.00567834
										AZD 500 nM	0.0323195	0.0090944	0.0254638	0.0222926	0.0119329	0.00879878
										AZD 1000 nM	0.0151983	0.0160319	0.0202752	0.0171684	0.00272262	0.00207117
										FOLFIRI 1/2	0.772655	0.82175	0.824282	0.806229	0.0291035	0.0223827
										AZD 100 nM + FOLFIRI	0.559521	0.638766	0.627086	0.608458	0.042781	0.0326245
										AZD 500 nM + FOLFIRI	0.568645	0.617646	0.623512	0.603268	0.030127	0.0230817
										AZD 1000 nM + FOLFIRI	0.547918	0.570626	0.604647	0.574397	0.028552	0.0201668
														Manip 03 15 24 réanalysée
														NT	0.0151861
														AZD2858 100 nM	0.0114236
														AZD2858 500 nM	0.0254638
														AZD2858 1000 nM	0.0202752
														FOLFIRI 1/2	0.824282
														AZD2858 100 nM + FOLFIRI	0.627086
														AZD2858 500 nM + FOLFIRI	0.623512
														AZD2858 1000 nM + FOLFIRI	0.604647

## Sheet: HCT116 p21 20h
											AVG Integrated Intensity, inhibition de p21 encore plus franche qu'en %cells
										20h TT
										% p21 positive cells
											2024-02-27	2024-02-15	2024-03-15	µ	S.D	S.E.M
										NT	0.103662	0.0641753	0.141408	0.103082	0.0386197	0.0259376
										AZD 100 nM	0.104027	0.0651945	0.119437	0.0962194	0.0279514	0.0206833
										AZD 500 nM	0.144788	0.0889207	0.140458	0.124722	0.0310806	0.0238677
										AZD 1000 nM	0.18996	0.0964066	0.166574	0.15098	0.0486872	0.0363825
										FOLFIRI 1/2	0.896749	0.887626	0.962448	0.915608	0.0408204	0.0312267
										AZD 100 nM + FOLFIRI	0.972264	0.941978	0.95871	0.95765	0.0151708	0.0104484
										AZD 500 nM + FOLFIRI	0.947904	0.907102	0.950394	0.935133	0.0243077	0.0186875
										AZD 1000 nM + FOLFIRI	0.946934	0.902243	0.940039	0.929739	0.0240602	0.0183305

## Sheet: HCT116 pDNApkcs 20h
										20h TT
										% pDNApkcs positive cells
											2024-02-27	2024-02-15	2024-03-15	µ	S.D	S.E.M
										NT	0.021969	0.0588398	0.0391257	0.0399782	0.0184502	0.0125744
										AZD 100 nM	0.0357532	0.0400734	0.0543507	0.0433924	0.00973284	0.00730549
										AZD 500 nM	0.0636611	0.058627	0.0593898	0.0605593	0.0027132	0.00206788
										AZD 1000 nM	0.0966027	0.157413	0.0433325	0.099116	0.0570816	0.0388645
										FOLFIRI 1/2	0.807243	0.814419	0.784585	0.802082	0.015572	0.0116648
										AZD 100 nM + FOLFIRI	0.916617	0.89952	0.888824	0.901654	0.0140187	0.00997547
										AZD 500 nM + FOLFIRI	0.901444	0.897327	0.911324	0.903365	0.00719357	0.00530607
										AZD 1000 nM + FOLFIRI	0.870413	0.886026	0.864676	0.873705	0.0110493	0.00821416
