# Supplementary material for: TopBP1 biomolecular condensates as a new therapeutic target in advanced-stage colorectal cancer
Source: eLife journal article supplement (doi:10.7554/elife.106196), 2025-05-15
Supplement: fig2-data3 [file DDR inhibition AZD+FOLFIRI HCT116 2h que AZD 1μM n = 3.xlsx]

## Sheet: HCT116 pChk1 2h
		2h TT
		% pChk1 positive cells
			2023-11-16	2024-02-27	2024-03-15	µ	S.D	S.E.M
		NT	0.148509	0.0911246	0.0802236	0.106619	0.0366848	0.0279265
		AZD 100 nM	0.199314	0.124058	0.0910084	0.138127	0.0555064	0.0407915
		AZD 500 nM	0.230407	0.158594	0.09408	0.161027	0.0681959	0.0462532
		AZD 1000 nM	0.183018	0.123779	0.0898465	0.132215	0.0471551	0.033869
		FOLFIRI 1/2	0.512572	0.615248	0.605197	0.577672	0.0566018	0.0434
		AZD 100 nM + FOLFIRI	0.374507	0.486249	0.342566	0.401107	0.0754447	0.0567612
		AZD 500 nM + FOLFIRI	0.300303	0.383573	0.213931	0.299269	0.0848254	0.0568917
		AZD 1000 nM + FOLFIRI	0.230532	0.327058	0.202995	0.253528	0.0651501	0.0490198

## Sheet: HCT116 gH2AX 2h
		2h TT
		% gH2AX positive cells
			2023-11-16	2024-02-27	2024-03-15	µ	S.D	S.E.M
		NT	0.0223301	0.0347832	0.0096427	0.022252	0.0125704	0.00840619
		AZD 100 nM	0.0472584	0.0641248	0.0329944	0.0481259	0.0155833	0.0106659
		AZD 500 nM	0.0206356	0.063112	0.0323727	0.0387068	0.0219351	0.0162701
		AZD 1000 nM	0.0210714	0.0597722	0.0131188	0.0313208	0.0249584	0.0189676
		FOLFIRI 1/2	0.713393	0.739534	0.725881	0.726269	0.0130748	0.00884316
		AZD 100 nM + FOLFIRI	0.692539	0.73929	0.739386	0.723738	0.0270197	0.0207998
		AZD 500 nM + FOLFIRI	0.70416	0.762223	0.753127	0.739837	0.03123	0.0237846
		AZD 1000 nM + FOLFIRI	0.667565	0.732422	0.735277	0.711755	0.0382963	0.02946
										Manip du 11/16/23 monter FOLFIRI à 70%
										% gH2AX positive cells
										NT	0.0223301
										AZD2858 100 nM	0.0472584
										AZD2858 500 nM	0.0206356
										AZD2858 1000 nM	0.0210714
										FOLFIRI 1/2	0.713393
										AZD2858 100 nM + FOLFIRI	0.692539
										AZD2858 500 nM + FOLFIRI	0.70416
										AZD2858 1000 nM + FOLFIRI	0.667565

## Sheet: HCT116 pATR 2h
		2h TT
		% pATR positive cells
			2023-11-16	2024-02-27	2024-03-15	µ	S.D	S.E.M
		NT		0.111214	0.0651745	0.0881944	0.0325551	0.0230199
		AZD 100 nM		0.092876	0.167842	0.130359	0.0530086	0.0374828
		AZD 500 nM		0.136519	0.181642	0.15908	0.0319072	0.0225618
		AZD 1000 nM		0.0702159	0.24838	0.159298	0.125981	0.0890822
		FOLFIRI 1/2		0.135523	0.173466	0.154495	0.0268297	0.0189715
		AZD 100 nM + FOLFIRI		0.179266	0.337357	0.258311	0.111787	0.0790455
		AZD 500 nM + FOLFIRI		0.211871	0.25416	0.233015	0.0299027	0.0211444
		AZD 1000 nM + FOLFIRI		0.0832546	0.163108	0.123181	0.0564651	0.0399269

## Sheet: HCT116 pChk2 2h
		2h TT
		% pChk2 positive cells
			2023-11-16	2024-02-27	2024-03-15	µ	S.D	S.E.M
		NT	0.118427	0.177401	0.149905	0.160136	0.0295098	0.0201006
		AZD 1000 nM	0.140855	0.211052	0.16997	0.173959	0.0352682	0.0247286
		FOLFIRI 1/2	0.310198	0.296555	0.288643	0.298465	0.0109035	0.00782161
		AZD 1000 nM + FOLFIRI	0.33564	0.295261	0.236406	0.289103	0.0499027	0.0351307
										manip du 11-16-23 descendre FOLFIRI à 30%
										% pChk2 positive cells
										NT	0.118427
										AZD2858 100 nM	0.140855
										FOLFIRI 1/2	0.310198
										AZD2858 1000 nM + FOLFIRI	0.33564

## Sheet: HCT116 pATM 2h
		2h TT
		% pATM positive cells
			2023-11-16	2024-02-27	2024-03-15	µ	S.D	S.E.M
		NT	0.0856185	0.102997	0.0873977	0.0920045	0.00956164	0.00732863
		AZD 1000 nM	0.130577	0.0644351	0.0761967	0.090403	0.0352854	0.0267828
		FOLFIRI 1/2	0.511933	0.514856	0.523214	0.516668	0.00585473	0.00436429
		AZD 1000 nM + FOLFIRI	0.409817	0.564921	0.534041	0.502926	0.0820996	0.0620726
							manip du 11/16/23 descendre FOLFIRI à 50% et NT à 10%
							manip du 15/03/24 monter FOLFIRI à 50% et NT 10%
										% pATM positive cells	2024-03-15
										NT	0.0873977
										AZD2858 100 nM	0.0761967
										FOLFIRI 1/2	0.523214
										AZD2858 1000 nM + FOLFIRI	0.534041
										% pATM positive cells	2023-11-21
										NT	0.0856185
										FOLFIRI 1/2	0.511933
										AZD2858 100 nM	0.130577
										AZD2858 1000 nM + FOLFIRI	0.409817

## Sheet: HCT116 pP53 2h
		2h TT
		% pP53 positive cells
			2023-11-16	2024-02-27	2024-03-15	µ	S.D	S.E.M
		NT	0.126121	0.0708097	0.0269085	0.0746132	0.0497157	0.0343388
		AZD 1000 nM	0.13887	0.106455	0.0362956	0.0938736	0.052432	0.0383853
		FOLFIRI 1/2	0.484232	0.627902	0.561783	0.557973	0.0719105	0.0491601
		AZD 1000 nM + FOLFIRI	0.275718	0.290992	0.315476	0.294062	0.0200562	0.0142761

## Sheet: HCT116 p21 2h
		2h TT
		% p21 positive cells
			2023-11-16	2024-02-27	2024-03-15	µ	S.D	S.E.M
		NT	0.112141	0.151562	0.117231	0.126978	0.021442	0.0163894
		AZD 1000 nM	0.133137	0.15568	0.113847	0.134221	0.0209377	0.0143058
		FOLFIRI 1/2	0.155496	0.207974	0.121397	0.161622	0.0436123	0.0309011
		AZD 1000 nM + FOLFIRI	0.195638	0.238039	0.139499	0.191058	0.0494291	0.034373

## Sheet: HCT116 pDNApkcs 2h
		2h TT
		% pDNApkcs positive cells
			2023-11-16	2024-02-27	2024-03-15	µ	S.D	S.E.M
		NT	0.0754895	0.0811381	0.0651268	0.0739182	0.0081205	0.0058609
		AZD 1000 nM	0.14286	0.100731	0.0854519	0.109681	0.0297323	0.0221195
		FOLFIRI 1/2	0.20607	0.282508	0.184731	0.224436	0.0514112	0.0387147
		AZD 1000 nM + FOLFIRI	0.438083	0.464141	0.422007	0.441411	0.0212629	0.0151536
