# Supplementary material for: TopBP1 biomolecular condensates as a new therapeutic target in advanced-stage colorectal cancer
Source: eLife journal article supplement (doi:10.7554/elife.106196), 2025-05-15
Supplement: fig2-data3 [file DDR inhibition AZD+FOLFIRI HCT116 n = 3 20h et n = 1 2h AZD 3 doses.xlsx]

## Sheet: HCT116 pChk1 2 et 20h
		2h TT								20h TT
		% pChk1 positive cells								% pChk1 positive cells
			2023-11-16	2024-02-27	2024-03-15	µ	S.D	S.E.M			2024-02-27	2024-02-15	2024-03-15	µ	S.D	S.E.M
		NT	0.148509	0.0911246	0.0802236	0.106619	0.0366848	0.0279265		NT	0.091446	0.076731	0.0805133	0.0828968	0.00764154	0.00569948
		AZD 100 nM	0.199314	0.124058	0.0910084	0.138127	0.0555064	0.0407915		AZD 100 nM	0.0925797	0.0810027	0.106246	0.0932762	0.0126362	0.00864673
		AZD 500 nM	0.230407	0.158594	0.09408	0.161027	0.0681959	0.0462532		AZD 500 nM	0.0919956	0.0936051	0.109827	0.0984759	0.00986323	0.0075674
		AZD 1000 nM	0.183018	0.123779	0.0898465	0.132215	0.0471551	0.033869		AZD 1000 nM	0.140992	0.120614	0.0989329	0.12018	0.0210331	0.0141645
		FOLFIRI 1/2	0.512572	0.615248	0.605197	0.577672	0.0566018	0.0434		FOLFIRI 1/2	0.715674	0.735037	0.80969	0.753467	0.0496435	0.0374818
		AZD 100 nM + FOLFIRI	0.374507	0.486249	0.342566	0.401107	0.0754447	0.0567612		AZD 100 nM + FOLFIRI	0.314842	0.466847	0.503526	0.428405	0.100044	0.0757088
		AZD 500 nM + FOLFIRI	0.300303	0.383573	0.213931	0.299269	0.0848254	0.0568917		AZD 500 nM + FOLFIRI	0.327061	0.376778	0.541768	0.415202	0.112393	0.0843772
		AZD 1000 nM + FOLFIRI	0.230532	0.327058	0.202995	0.253528	0.0651501	0.0490198		AZD 1000 nM + FOLFIRI	0.344796	0.415302	0.465463	0.40852	0.060619	0.0424831

## Sheet: HCT116 gH2AX 2 et 20h
		Manip du 11/16/23 ajustée, regarder autre document
		2h TT								20h TT
		% gH2AX positive cells								% gH2AX positive cells
			2023-11-16	2024-02-27	2024-03-15	µ	S.D	S.E.M			2024-02-27	2024-02-15	2024-03-15	µ	S.D	S.E.M
		NT	0.0223301	0.0347832	0.0096427	0.022252	0.0125704	0.00840619		NT	0.011342	0.03215	0.00941988	0.0176373	0.0126051	0.00967514
		AZD 100 nM	0.0472584	0.0641248	0.0329944	0.0481259	0.0155833	0.0106659		AZD 100 nM	0.0174578	0.055678	0.0299842	0.0343733	0.0194845	0.0142031
		AZD 500 nM	0.0206356	0.063112	0.0323727	0.0387068	0.0219351	0.0162701		AZD 500 nM	0.0249194	0.0564643	0.024621	0.0353349	0.0182992	0.0140863
		AZD 1000 nM	0.0210714	0.0597722	0.0131188	0.0313208	0.0249584	0.0189676		AZD 1000 nM	0.0272991	0.0357995	0.0378376	0.0336454	0.00558975	0.00423088
		FOLFIRI 1/2	0.713393	0.739534	0.725881	0.726269	0.0130748	0.00884316		FOLFIRI 1/2	0.743876	0.734709	0.80334	0.760642	0.0372609	0.0284656
		AZD 100 nM + FOLFIRI	0.692539	0.73929	0.739386	0.723738	0.0270197	0.0207998		AZD 100 nM + FOLFIRI	0.816622	0.748346	0.861491	0.80882	0.0569744	0.0403156
		AZD 500 nM + FOLFIRI	0.70416	0.762223	0.753127	0.739837	0.03123	0.0237846		AZD 500 nM + FOLFIRI	0.831072	0.73305	0.849609	0.804577	0.0626334	0.0476844
		AZD 1000 nM + FOLFIRI	0.667565	0.732422	0.735277	0.711755	0.0382963	0.02946		AZD 1000 nM + FOLFIRI	0.796565	0.73924	0.846457	0.794087	0.0536513	0.0365649

## Sheet: HCT116 pATR 2 et 20h
		2h TT								20h TT
		% pATR positive cells								% pATR positive cells
			2023-11-16	2024-02-27	2024-03-15	µ	S.D	S.E.M			2024-02-27	2024-02-15	2024-03-15	µ	S.D	S.E.M
		NT		0.111214	0.0651745	0.0881944	0.0325551	0.0230199		NT	0.13907	0.129033	0.131291	0.133131	0.00526572	0.00395933
		AZD 100 nM		0.092876	0.167842	0.130359	0.0530086	0.0374828		AZD 100 nM	0.0854852	0.100803	0.124823	0.103704	0.0198289	0.0140798
		AZD 500 nM		0.136519	0.181642	0.15908	0.0319072	0.0225618		AZD 500 nM	0.0742079	0.126066	0.184305	0.128193	0.0550795	0.0374082
		AZD 1000 nM		0.0702159	0.288886	0.179551	0.154623	0.109335		AZD 1000 nM	0.115463	0.170661	0.179099	0.155074	0.0345632	0.0264078
		FOLFIRI 1/2		0.135523	0.173466	0.154495	0.0268297	0.0189715		FOLFIRI 1/2	0.489174	0.406679	0.416666	0.437506	0.0450233	0.0344451
		AZD 100 nM + FOLFIRI		0.179266	0.337357	0.258311	0.111787	0.0790455		AZD 100 nM + FOLFIRI	0.34554	0.482358	0.40085	0.409583	0.0688255	0.0485168
		AZD 500 nM + FOLFIRI		0.211871	0.25416	0.233015	0.0299027	0.0211444		AZD 500 nM + FOLFIRI	0.337732	0.508646	0.440972	0.429116	0.0860717	0.0609232
		AZD 1000 nM + FOLFIRI		0.0832546	0.163108	0.123181	0.0564651	0.0399269		AZD 1000 nM + FOLFIRI	0.339606	0.42805	0.425758	0.397805	0.0504146	0.0387991
														manip du 03 15 24 descendre NT à 15%
														% pATR positive cells
														NT	0.131291
														AZD2858 100 nM	0.124823
														AZD2858 500 nM	0.184305
														AZD2858 1000 nM	0.179099
														FOLFIRI 1/2	0.416666
														AZD2858 100 nM + FOLFIRI	0.40085
														AZD2858 500 nM + FOLFIRI	0.440972
														AZD2858 1000 nM + FOLFIRI	0.425758

## Sheet: HCT116 pChk2 2 et 20h
		2h TT								20h TT
		% pChk2 positive cells								% pChk2 positive cells
			2023-11-16	2024-02-27	2024-03-15	µ	S.D	S.E.M			2024-02-27	2024-02-15	2024-03-15	µ	S.D	S.E.M
		NT	0.203735	0.177401	0.149905	0.177014	0.0269175	0.0180727		NT	0.167391	0.21764	0.228914	0.204648	0.0327545	0.0248383
		AZD 100 nM		0.188419	0.168317	0.178368	0.0142146	0.0100512		AZD 100 nM	0.162514	0.175143	0.178427	0.172028	0.00840152	0.00634281
		AZD 500 nM		0.210743	0.160078	0.18541	0.0358256	0.0253325		AZD 500 nM	0.201523	0.144319	0.179306	0.175049	0.0288382	0.0204866
		AZD 1000 nM	0.248866	0.211052	0.16997	0.209963	0.0394591	0.0266616		AZD 1000 nM	0.223943	0.160243	0.22347	0.202552	0.0366417	0.0282062
		FOLFIRI 1/2	0.450844	0.296555	0.288643	0.345348	0.0914485	0.0703312		FOLFIRI 1/2	0.461517	0.550132	0.505905	0.505851	0.0443074	0.0295562
		AZD 100 nM + FOLFIRI		0.332041	0.229808	0.280924	0.0722899	0.0511167		AZD 100 nM + FOLFIRI	0.173345	0.217235	0.327745	0.239442	0.0795593	0.0588688
		AZD 500 nM + FOLFIRI		0.298747	0.248385	0.273566	0.0356111	0.0251809		AZD 500 nM + FOLFIRI	0.220167	0.306185	0.423516	0.316623	0.102075	0.0712622
		AZD 1000 nM + FOLFIRI	0.47341	0.295261	0.236406	0.335026	0.123404	0.0922563		AZD 1000 nM + FOLFIRI	0.224906	0.306514	0.403546	0.311655	0.0894307	0.0612603
														manip du 03 15 24 monter FOLFIRI à 50%
														% pChk2 positive cells
														NT	0.228914
														AZD2858 100 nM	0.178427
														AZD2858 500 nM	0.179306
														AZD2858 1000 nM	0.22347
														FOLFIRI 1/2	0.505905
														AZD2858 100 nM + FOLFIRI	0.327745
														AZD2858 500 nM + FOLFIRI	0.423516
														AZD2858 1000 nM + FOLFIRI	0.403546

## Sheet: HCT116 pATM 2 et 20h
		2h TT								20h TT
		% pATM positive cells								% pATM positive cells
			2023-11-16	2024-02-27	2024-03-15	µ	S.D	S.E.M			2024-02-27	2024-02-15	2024-03-15	µ	S.D	S.E.M
		NT	0.196964	0.102997	0.0393679	0.11311	0.0792834	0.055903		NT	0.168623	0.193237	0.153655	0.171838	0.0199862	0.0142659
		AZD 100 nM		0.0666303	0.0361173	0.0513738	0.021576	0.0152565		AZD 100 nM	0.114317	0.0878628	0.186729	0.129636	0.0511825	0.0380618
		AZD 500 nM		0.069269	0.0408503	0.0550597	0.0200951	0.0142093		AZD 500 nM	0.135648	0.096188	0.298225	0.176687	0.107088	0.0810253
		AZD 1000 nM	0.280048	0.0644351	0.0352826	0.126589	0.133697	0.102306		AZD 1000 nM	0.221415	0.235064	0.35366	0.270046	0.0727324	0.0557424
		FOLFIRI 1/2	0.577228	0.514856	0.350384	0.480823	0.117189	0.0869592		FOLFIRI 1/2	0.576728	0.476483	0.555412	0.536207	0.0528094	0.0398162
		AZD 100 nM + FOLFIRI		0.544682	0.364772	0.454727	0.127216	0.0899552		AZD 100 nM + FOLFIRI	0.509767	0.638708	0.630674	0.593049	0.0722367	0.0555218
		AZD 500 nM + FOLFIRI		0.599072	0.327671	0.463371	0.191909	0.135701		AZD 500 nM + FOLFIRI	0.634932	0.649652	0.748931	0.677838	0.0620064	0.0473951
		AZD 1000 nM + FOLFIRI	0.512545	0.564921	0.36812	0.481862	0.101925	0.075828		AZD 1000 nM + FOLFIRI	0.676048	0.636085	0.785729	0.699288	0.0774815	0.0576277
														manip 03 15 2024 monter FOLFIRI à 50%
														% pATM positive cells
														NT	0.153655
														AZD2858 100 nM	0.186729
														AZD2858 500 nM	0.298225
														AZD2858 1000 nM	0.35366
														FOLFIRI 1/2	0.555412
														AZD2858 100 nM + FOLFIRI	0.630674
														AZD2858 500 nM + FOLFIRI	0.748931
														AZD2858 1000 nM + FOLFIRI	0.785729

## Sheet: HCT116 pP53 2 et 20h
		2h TT								20h TT
		% pP53 positive cells								% pP53 positive cells
			2023-11-16	2024-02-27	2024-03-15	µ	S.D	S.E.M			2024-02-27	2024-02-15	2024-03-15	µ	S.D	S.E.M
		NT	0.126121	0.0708097	0.0269085	0.0746132	0.0497157	0.0343388		NT	0.0141966	0.0116404	0.028073	0.01797	0.0088423	0.00673532
		AZD 100 nM		0.116969	0.0499049	0.0834369	0.0474214	0.033532		AZD 100 nM	0.0228361	0.00869597	0.0211133	0.0175484	0.0077147	0.00590164
		AZD 500 nM		0.13125	0.0386405	0.0849451	0.0654845	0.0463045		AZD 500 nM	0.0323195	0.0090944	0.0456151	0.0290097	0.0184839	0.0132768
		AZD 1000 nM	0.13887	0.106455	0.0362956	0.0938736	0.052432	0.0383853		AZD 1000 nM	0.0151983	0.0160319	0.0337122	0.0216475	0.0104567	0.00804319
		FOLFIRI 1/2	0.484232	0.627902	0.561783	0.557973	0.0719105	0.0491601		FOLFIRI 1/2	0.772655	0.82175	0.877442	0.823949	0.0524281	0.035662
		AZD 100 nM + FOLFIRI		0.473316	0.383006	0.428161	0.063859	0.0451551		AZD 100 nM + FOLFIRI	0.559521	0.638766	0.74026	0.646183	0.0905976	0.0627186
		AZD 500 nM + FOLFIRI		0.362837	0.350846	0.356841	0.00847879	0.00599541		AZD 500 nM + FOLFIRI	0.568645	0.617646	0.744913	0.643735	0.090984	0.0674523
		AZD 1000 nM + FOLFIRI	0.275718	0.290992	0.315476	0.294062	0.0200562	0.0142761		AZD 1000 nM + FOLFIRI	0.547918	0.570626	0.716298	0.611614	0.091367	0.0697892

## Sheet: HCT116 p21 2 et 20h
											AVG Integrated Intensity, inhibition de p21 encore plus franche qu'en %cells
		2h TT								20h TT
		% p21 positive cells								% p21 positive cells
			2023-11-16	2024-02-27	2024-03-15	µ	S.D	S.E.M			2024-02-27	2024-02-15	2024-03-15	µ	S.D	S.E.M
		NT	0.112141	0.151562	0.117231	0.126978	0.021442	0.0163894		NT	0.103662	0.0641753	0.141408	0.103082	0.0386197	0.0259376
		AZD 100 nM		0.151069	0.110907	0.130988	0.0283989	0.020081		AZD 100 nM	0.104027	0.0651945	0.119437	0.0962194	0.0279514	0.0206833
		AZD 500 nM		0.146018	0.0985662	0.122292	0.0335536	0.023726		AZD 500 nM	0.144788	0.0889207	0.140458	0.124722	0.0310806	0.0238677
		AZD 1000 nM		0.15568	0.113847	0.134763	0.0295807	0.0209167		AZD 1000 nM	0.18996	0.0964066	0.166574	0.15098	0.0486872	0.0363825
		FOLFIRI 1/2	0.155496	0.207974	0.121397	0.161622	0.0436123	0.0309011		FOLFIRI 1/2	0.896749	0.887626	0.962448	0.915608	0.0408204	0.0312267
		AZD 100 nM + FOLFIRI	0.133137	0.197084	0.124422	0.151548	0.0396754	0.0303573		AZD 100 nM + FOLFIRI	0.972264	0.941978	0.95871	0.95765	0.0151708	0.0104484
		AZD 500 nM + FOLFIRI		0.199616	0.128199	0.163907	0.0504994	0.0357085		AZD 500 nM + FOLFIRI	0.947904	0.907102	0.950394	0.935133	0.0243077	0.0186875
		AZD 1000 nM + FOLFIRI	0.195638	0.238039	0.139499	0.191058	0.0494291	0.034373		AZD 1000 nM + FOLFIRI	0.946934	0.902243	0.940039	0.929739	0.0240602	0.0183305

## Sheet: HCT116 pDNApkcs 2 et 20h
		2h TT								20h TT
		% pDNApkcs positive cells								% pDNApkcs positive cells
			2023-11-16	2024-02-27	2024-03-15	µ	S.D	S.E.M			2024-02-27	2024-02-15	2024-03-15	µ	S.D	S.E.M
		NT	0.0754895	0.0811381	0.0651268	0.0739182	0.0081205	0.0058609		NT	0.021969	0.0588398	0.0391257	0.0399782	0.0184502	0.0125744
		AZD 100 nM		0.072138	0.0887837	0.0804609	0.0117703	0.00832288		AZD 100 nM	0.0357532	0.0400734	0.0543507	0.0433924	0.00973284	0.00730549
		AZD 500 nM		0.0718047	0.0793208	0.0755627	0.00531469	0.00375805		AZD 500 nM	0.0636611	0.058627	0.0593898	0.0605593	0.0027132	0.00206788
		AZD 1000 nM	0.14286	0.100731	0.0854519	0.109681	0.0297323	0.0221195		AZD 1000 nM	0.0966027	0.157413	0.0433325	0.099116	0.0570816	0.0388645
		FOLFIRI 1/2	0.20607	0.282508	0.184731	0.224436	0.0514112	0.0387147		FOLFIRI 1/2	0.807243	0.814419	0.784585	0.802082	0.015572	0.0116648
		AZD 100 nM + FOLFIRI		0.27212	0.23333	0.252725	0.0274285	0.0193949		AZD 100 nM + FOLFIRI	0.916617	0.89952	0.888824	0.901654	0.0140187	0.00997547
		AZD 500 nM + FOLFIRI		0.3489	0.298461	0.32368	0.0356662	0.0252198		AZD 500 nM + FOLFIRI	0.901444	0.897327	0.911324	0.903365	0.00719357	0.00530607
		AZD 1000 nM + FOLFIRI	0.438083	0.464141	0.422007	0.441411	0.0212629	0.0151536		AZD 1000 nM + FOLFIRI	0.870413	0.886026	0.864676	0.873705	0.0110493	0.00821416
