# Supplementary material for: TopBP1 biomolecular condensates as a new therapeutic target in advanced-stage colorectal cancer
Source: eLife journal article supplement (doi:10.7554/elife.106196), 2025-05-15
Supplement: fig3-data1 [file Fig3D-Source Data 1.pdf › Fig 3D and E- Source Data 1/Fig3D-Source Data 1.pdf]

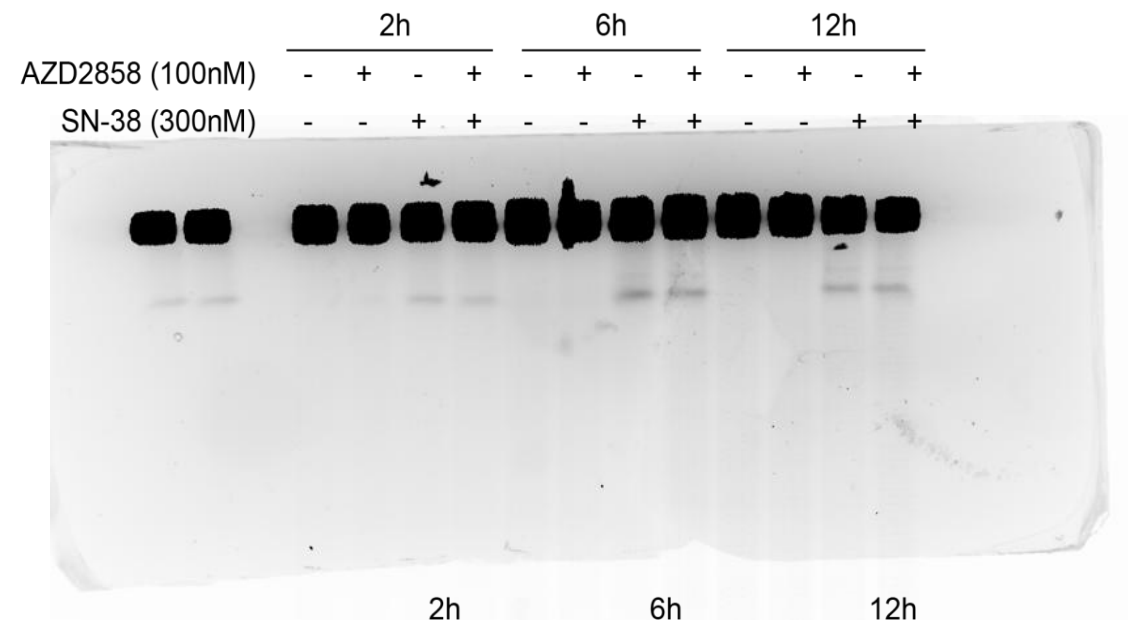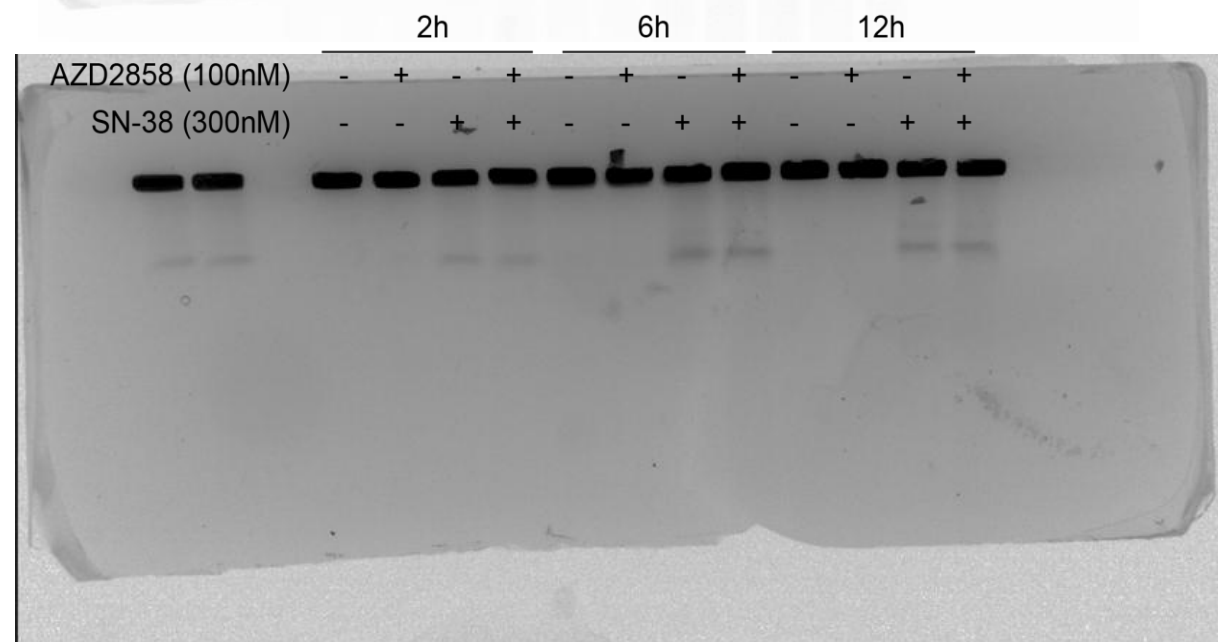

**Figure 3, Source Data 1.** Original membranes corresponding to Figure 3D  
 PFGE analysis of DNA damage in HCT116 cells incubated with AZD2858 (100 nM) and/or SN-38 (300 nM) for the indicated times. The experiment was replicated 3 times, and a representative replicate is shown
