# Supplementary material for: TopBP1 biomolecular condensates as a new therapeutic target in advanced-stage colorectal cancer
Source: eLife journal article supplement (doi:10.7554/elife.106196), 2025-05-15
Supplement: fig3-data3 [file Copy of fiberQ laura.xlsx]

## Sheet: rep1
NT	Length_Of_Each_Part_1	Length_Of_Each_Part_2		SN	Length_Of_Each_Part_1	Length_Of_Each_Part_2		AZD	Length_Of_Each_Part_1	Length_Of_Each_Part_2		AZD+SN	Length_Of_Each_Part_1	Length_Of_Each_Part_2				replicate	condition	CldU			replicate	condition	IdU
	41	120			91	75			66	47			26	61				1	NT	120			1	NT	41
	27	84			75	22			54	38			47	35				1	NT	84			1	NT	27
	40	90			16	39			10	81			7	64				1	NT	90			1	NT	40
	32	64			81	31			15	117			18	55				1	NT	64			1	NT	32
	49	50			113	38			11	55			20	40				1	NT	50			1	NT	49
	30	62			81	19			14	47			18	38				1	NT	62			1	NT	30
	31	62			16	93			18	42			15	62				1	NT	62			1	NT	31
	80	126			16	74			15	43			68	56				1	NT	126			1	NT	80
	25	60			26	38			19	44			21	31				1	NT	60			1	NT	25
	32	53			12	79			26	44			26	24				1	NT	53			1	NT	32
	88	62			51	19			17	37			20	29				1	NT	62			1	NT	88
	28	54			10	50			10	43			73	10				1	NT	54			1	NT	28
	30	49			46	73			28	47			26	23				1	NT	49			1	NT	30
	25	53			80	22			17	32			39	9				1	NT	53			1	NT	25
	56	47			64	20			6	43			48	62				1	NT	47			1	NT	56
	24	51			88	14			54	27			31	60				1	NT	51			1	NT	24
	124	51			18	28			15	29			62	60				1	NT	51			1	NT	124
	35	40			34	79			21	50			18	53				1	NT	40			1	NT	35
	30	46			103	11			42	29			25	32				1	NT	46			1	NT	30
	46	125			7	55			49	55			31	15				1	NT	125			1	NT	46
	27	45			51	67			12	79			76	12				1	NT	45			1	NT	27
	74	109			31	11			20	29			8	36				1	NT	109			1	NT	74
	24	48			32	17			53	74			7	37				1	NT	48			1	NT	24
	27	44			38	19			57	35			18	42				1	NT	44			1	NT	27
	26	49			18	32			56	69			24	18				1	NT	49			1	NT	26
	22	49			102	30			55	16			11	29				1	NT	49			1	NT	22
	29	40			35	39			65	21			46	50				1	NT	40			1	NT	29
	26	43			33	51			75	44			18	26				1	NT	43			1	NT	26
	18	51			21	51			13	86			30	44				1	NT	51			1	NT	18
	57	84			39	24			47	85			88	47				1	NT	84			1	NT	57
	54	41			57	13			24	105			53	31				1	NT	41			1	NT	54
	34	31			51	13			20	67			40	12				1	NT	31			1	NT	34
	24	42			18	69			12	48			18	39				1	NT	42			1	NT	24
	12	51			17	33			110	20			46	9				1	NT	51			1	NT	12
	48	15			19	23			10	71			17	45				1	NT	15			1	NT	48
	26	36			45	7			19	39			15	37				1	NT	36			1	NT	26
	16	43			7	45			17	58			26	34				1	NT	43			1	NT	16
	25	44			35	24			14	33			39	21				1	NT	44			1	NT	25
	83	32			20	75			28	37			63	13				1	NT	32			1	NT	83
	37	21			89	55			18	36			30	12				1	NT	21			1	NT	37
	31	28			7	60			20	40			19	32				1	NT	28			1	NT	31
	36	69			6	78			19	36			42	26				1	NT	69			1	NT	36
	103	37			69	20			64	41			47	5				1	NT	37			1	NT	103
	20	41			57	19			20	28			12	35				1	NT	41			1	NT	20
	103	28			24	36			13	44			82	15				1	NT	28			1	NT	103
	7	40			25	49			50	31			41	19				1	NT	40			1	NT	7
	31	44			13	39			41	13			38	18				1	NT	44			1	NT	31
	23	35			5	42			16	31			25	24				1	NT	35			1	NT	23
	23	40			27	37			38	30			21	27				1	NT	40			1	NT	23
	42	44			20	24			30	67			12	69				1	NT	44			1	NT	42
	59	72			103	41			21	24			24	20				1	NT	72			1	NT	59
	45	46			48	19			15	30			18	93				1	NT	46			1	NT	45
	89	53			111	5			12	31			48	24				1	NT	53			1	NT	89
	33	84			20	44			19	30			55	20				1	NT	84			1	NT	33
	40	51			24	51			18	26			16	58				1	NT	51			1	NT	40
	37	41			38	31			13	29			9	64				1	NT	41			1	NT	37
	56	21			49	16			20	22			43	21				1	NT	21			1	NT	56
	39	91			23	63			54	23			33	33				1	NT	91			1	NT	39
	221	48			28	66			23	33			47	16				1	NT	48			1	NT	221
	20	108			134	93			6	63			13	63				1	NT	108			1	NT	20
	168	32			59	20			21	40			83	52				1	NT	32			1	NT	168
	75	10			6	47			23	34			17	38				1	NT	10			1	NT	75
	99	4			42	17			17	80			29	29				1	NT	4			1	NT	99
	43	39			25	26			37	22			49	40				1	NT	39			1	NT	43
	45	33			64	12			15	31			26	34				1	NT	33			1	NT	45
	93	4			36	50			16	31			41	14				1	NT	4			1	NT	93
	41	39			25	35			15	45			32	17				1	NT	39			1	NT	41
	102	68			12	43			79	35			17	58				1	NT	68			1	NT	102
	26	44			142	19			54	65			62	10				1	NT	44			1	NT	26
	16	103			27	24			36	20			4	42				1	NT	103			1	NT	16
	53	20			23	40			45	34			14	32				1	NT	20			1	NT	53
	26	44			29	20			18	37			32	14				1	NT	44			1	NT	26
	23	43			18	39			43	15			16	72				1	NT	43			1	NT	23
	51	13			87	32			18	39			28	12				1	NT	13			1	NT	51
	30	66			91	13			63	16			15	29				1	NT	66			1	NT	30
	26	34			16	38			14	60			59	47				1	NT	34			1	NT	26
	17	45			47	13			11	42			38	5				1	NT	45			1	NT	17
	28	34			17	60			18	31			50	21				1	NT	34			1	NT	28
	29	42			26	29			61	132			43	23				1	NT	42			1	NT	29
	30	28			44	9			37	65			13	29				1	NT	28			1	NT	30
	31	40			48	48			84	42			26	5				1	NT	40			1	NT	31
	20	40			52	9			18	47			47	9				1	NT	40			1	NT	20
	94	12			16	34			26	39			6	64				1	NT	12			1	NT	94
	16	54			61	14			40	24			21	30				1	NT	54			1	NT	16
	35	20			26	20			15	44			8	50				1	NT	20			1	NT	35
	52	10			16	26			11	48			7	45				1	NT	10			1	NT	52
	43	58			29	36			19	38			17	30				1	NT	58			1	NT	43
	34	100			18	51			26	31			13	46				1	NT	100			1	NT	34
	67	11			14	40			19	39			9	51				1	NT	11			1	NT	67
	50	31			59	9			12	45			22	26				1	NT	31			1	NT	50
	120	10			29	14			18	67			14	32				1	NT	10			1	NT	120
	54	3			41	22			25	42			40	15				1	NT	3			1	NT	54
	26	25			14	38			17	36			34	13				1	NT	25			1	NT	26
	18	27			6	45			16	90			21	37				1	NT	27			1	NT	18
	34	36			36	25			33	80			10	77				1	NT	36			1	NT	34
	21	32			35	28			39	35			32	40				1	NT	32			1	NT	21
	21	32			22	31			23	25			33	16				1	NT	32			1	NT	21
	21	32			33	14			22	25			42	5				1	NT	32			1	NT	21
	22	29			27	39			10	34			75	17				1	NT	29			1	NT	22
	33	55			12	32			12	35			11	48				1	NT	55			1	NT	33
	23	28			8	39			9	36			62	17				1	NT	28			1	NT	23
	22	33			31	45			97	18			25	34				1	NT	33			1	NT	22
	12	39			18	40			38	7			31	57				1	NT	39			1	NT	12
	23	31			40	7			19	42			33	21				1	NT	31			1	NT	23
	36	34			50	9			202	23			22	72				1	NT	34			1	NT	36
	27	22			35	66			71	25			41	17				1	NT	22			1	NT	27
	20	42			38	36			21	48			103	31				1	NT	42			1	NT	20
	32	103			76	22			10	43			20	65				1	NT	103			1	NT	32
	18	28			127	89			49	18			56	16				1	NT	28			1	NT	18
	11	35			41	18			14	48			78	11				1	NT	35			1	NT	11
	16	30			87	26			57	7			32	63				1	NT	30			1	NT	16
	68	51			22	35			17	35			11	38				1	NT	51			1	NT	68
	90	16			26	36			31	27			51	13				1	NT	16			1	NT	90
	42	24			18	36			45	7			66	20				1	NT	24			1	NT	42
	20	26			19	36			56	9			69	15				1	NT	26			1	NT	20
	56	18			22	17			13	95			15	27				1	NT	18			1	NT	56
	22	38			31	20			70	11			21	25				1	NT	38			1	NT	22
	16	29			135	12			50	21			27	22				1	NT	29			1	NT	16
	57	13			45	15			13	53			24	21				1	NT	13			1	NT	57
	35	53			35	25			12	58			10	81				1	NT	53			1	NT	35
	13	29			16	42			47	71			17	29				1	NT	29			1	NT	13
	17	28			53	2			15	49			43	50				1	NT	28			1	NT	17
	23	22			27	48			19	35			24	35				1	NT	22			1	NT	23
	16	29			11	42			14	44			49	11				1	NT	29			1	NT	16
	9	46			12	48			19	48			10	94				1	NT	46			1	NT	9
	57	23			15	30			25	110			21	56				1	NT	23			1	NT	57
	10	34			28	14			48	10			29	40				1	NT	34			1	NT	10
	15	26			4	40			26	29			67	41				1	NT	26			1	NT	15
	32	17			40	11			21	28			79	18				1	NT	17			1	NT	32
	38	49			31	37			13	36			23	47				1	NT	49			1	NT	38
	14	58			56	9			25	30			24	18				1	NT	58			1	NT	14
	13	34			11	29			28	67			28	14				1	NT	34			1	NT	13
	49	24			35	13			44	38			20	30				1	NT	24			1	NT	49
	50	55			88	45			10	36			30	18				1	NT	55			1	NT	50
	88	34			12	49			41	67			23	30				1	NT	34			1	NT	88
	67	27			49	11			15	31			5	46				1	NT	27			1	NT	67
	29	24			36	29			12	32			46	78				1	NT	24			1	NT	29
	23	42			12	39			14	31			46	22				1	NT	42			1	NT	23
	111	11			6	43			12	30			29	24				1	NT	11			1	NT	111
	95	17			31	13			9	31			9	70				1	NT	17			1	NT	95
	32	22			24	22			12	30			86	36				1	NT	22			1	NT	32
	28	33			10	39			69	18			44	25				1	NT	33			1	NT	28
	22	30			16	26			9	36			41	18				1	NT	30			1	NT	22
	13	37			19	25			18	32			23	28				1	NT	37			1	NT	13
	9	47			25	43			20	33			43	8				1	NT	47			1	NT	9
	36	34			46	24			34	13			5	122				1	NT	34			1	NT	36
	19	37			15	54			78	39			51	79				1	NT	37			1	NT	19
	16	39			7	32			17	45			21	87				1	NT	39			1	NT	16
	10	41			5	57			24	43			54	26				1	NT	41			1	NT	10
	23	40			43	41			58	29			37	41				1	NT	40			1	NT	23
	32	70			30	37			16	66			10	67				1	NT	70			1	NT	32
	19	32			44	14			279	21			45	27				1	NT	32			1	NT	19
	10	35			32	12			20	71			29	31				1	NT	35			1	NT	10
	41	22			42	33			80	25			14	45				1	NT	22			1	NT	41
	16	37			15	33			36	48			15	104				1	NT	37			1	NT	16
	30	21			32	10			50	95			19	75				1	NT	21			1	NT	30
	39	64			19	35			5	150			77	20				1	NT	64			1	NT	39
	30	24			33	38			56	24			37	83				1	NT	24			1	NT	30
	17	24			77	23			162	21			18	57				1	NT	24			1	NT	17
	59	24			58	72			14	42			17	64				1	NT	24			1	NT	59
	30	26			7	53			19	41			37	68				1	NT	26			1	NT	30
	44	27			40	44			41	4			48	27				1	NT	27			1	NT	44
	19	27			50	13			54	33			67	35				1	NT	27			1	NT	19
	20	29			19	47			37	27			43	87				1	NT	29			1	NT	20
	48	16			7	53			46	28			78	96				1	NT	16			1	NT	48
	168	4			50	49			27	57			49	53				1	NT	4			1	NT	168
	28	17			23	53			17	40			53	38				1	NT	17			1	NT	28
	33	20			19	32			38	38			77	25				1	NT	20			1	NT	33
	27	20			28	19			10	48			56	32				1	NT	20			1	NT	27
	31	20			30	26			62	64			103	39				1	NT	20			1	NT	31
	22	31			102	19			40	51			68	12				1	NT	31			1	NT	22
	86	28			19	39			19	98			71	26				1	NT	28			1	NT	86
	55	201			44	9			25	51			75	35				1	NT	201			1	NT	55
	72	29			61	27			61	13			116	20				1	NT	29			1	NT	72
	16	124			28	34			19	213			11	156				1	NT	124			1	NT	16
	56	77			38	32			17	47			35	42				1	NT	77			1	NT	56
	55	29			18	45			21	81			23	58				1	NT	29			1	NT	55
	26	56			51	44			21	41			29	46				1	NT	56			1	NT	26
	87	87			97	24			13	86			115	9				1	NT	87			1	NT	87
	27	58			50	21			21	40			45	28				1	NT	58			1	NT	27
	28	49			57	10			127	48			15	41				1	NT	49			1	NT	28
	75	45			20	48			22	34			19	83				1	NT	45			1	NT	75
	46	29			23	41			34	60			10	101				1	NT	29			1	NT	46
	28	39			45	26			20	29			41	105				1	NT	39			1	NT	28
	28	39			27	19			28	69			31	58				1	NT	39			1	NT	28
	86	30			20	24			29	45			5	112				1	NT	30			1	NT	86
	47	22			57	30			73	11			54	41				1	NT	22			1	NT	47
	21	41			30	16			40	26			6	57				1	NT	41			1	NT	21
	18	45			85	10			11	66			19	60				1	NT	45			1	NT	18
	15	45			88	20			57	20			35	39				1	NT	45			1	NT	15
	19	39			29	37			12	94			64	18				1	NT	39			1	NT	19
	33	62			67	23			38	39			29	33				1	NT	62			1	NT	33
	21	36			29	33			23	41			80	19				1	NT	36			1	NT	21
	20	39			14	43			157	25			72	13				1	NT	39			1	NT	20
	25	34			22	31			67	47			22	49				1	NT	34			1	NT	25
	22	35			20	29			20	67			39	93				1	NT	35			1	NT	22
	6	122			24	62			29	47			31	36				1	NT	122			1	NT	6
	19	40			15	31			52	46			35	24				1	NT	40			1	NT	19
	24	28			13	23			17	47			25	91				1	NT	28			1	NT	24
	32	29			11	33			65	21			45	29				1	NT	29			1	NT	32
	21	32			23	23			21	89			40	27				1	NT	32			1	NT	21
	19	40			96	14			4	73			53	17				1	NT	40			1	NT	19
	13	39			19	52			17	41			21	86				1	NT	39			1	NT	13
	25	51			13	31			11	42			11	85				1	NT	51			1	NT	25
	21	32			3	43			34	18			110	92				1	NT	32			1	NT	21
	21	33			23	23			21	39			92	19				1	NT	33			1	NT	21
	70	17			24	16			16	32			31	81				1	NT	17			1	NT	70
	71	62			76	23			19	33			85	32				1	NT	62			1	NT	71
	19	32			38	58			82	43			15	97				1	NT	32			1	NT	19
	23	48			54	25			129	8			19	38				1	NT	48			1	NT	23
	18	32			46	25			27	40			24	32				1	NT	32			1	NT	18
	32	71			38	32			43	13			20	34				1	NT	71			1	NT	32
	20	29			61	49			32	90			24	32				1	NT	29			1	NT	20
	18	28			38	32			37	19			21	33				1	NT	28			1	NT	18
	48	19			122	9			39	9			80	17				1	NT	19			1	NT	48
	26	18							37	119			46	18				1	NT	18			1	NT	26
	12	32							27	91			36	75				1	NT	32			1	NT	12
	17	28							28	59			19	56				1	NT	28			1	NT	17
	42	35							29	49			74	9				1	NT	35			1	NT	42
	74	14							45	50			18	46				1	NT	14			1	NT	74
	41	31							26	45			16	76				1	NT	31			1	NT	41
	83	32							25	43			23	44				1	NT	32			1	NT	83
	20	26							49	31			45	20				1	NT	26			1	NT	20
	27	57							60	55			61	5				1	NT	57			1	NT	27
	20	39							149	18			18	45				1	NT	39			1	NT	20
	8	52							56	70			16	35				1	NT	52			1	NT	8
	85	32							4	56			33	107				1	NT	32			1	NT	85
	123	40							94	20			39	31				1	NT	40			1	NT	123
	10	78							15	36			31	49				1	NT	78			1	NT	10
	21	38							33	47			3	42				1	NT	38			1	NT	21
	56	2							97	17			39	30				1	NT	2			1	NT	56
	12	30							11	51			82	10				1	NT	30			1	NT	12
	31	46							79	37			34	11				1	NT	46			1	NT	31
	70	9							22	42			59	29				1	NT	9			1	NT	70
	18	64							18	24			25	19				1	NT	64			1	NT	18
	12	48							31	53			62	28				1	NT	48			1	NT	12
	23	37							27	54			46	37				1	NT	37			1	NT	23
	43	25							33	59			39	36				1	NT	25			1	NT	43
	31	20							84	40			15	45				1	NT	20			1	NT	31
	15	28							23	39			42	19				1	NT	28			1	NT	15
	10	47							11	44			26	29				1	NT	47			1	NT	10
	58	38							49	27			25	28				1	NT	38			1	NT	58
	45	11							23	26			31	51				1	NT	11			1	NT	45
	26	22							22	30			19	33				1	NT	22			1	NT	26
	40	16							6	41			32	20				1	NT	16			1	NT	40
	67	5							40	37			29	22				1	NT	5			1	NT	67
	24	53							24	35			18	33				1	NT	53			1	NT	24
	26	23							72	54			52	45				1	NT	23			1	NT	26
	44	57							17	31			29	58				1	NT	57			1	NT	44
	15	69							27	34			36	29				1	NT	69			1	NT	15
	39	48							35	28			9	61				1	NT	48			1	NT	39
	18	56							19	40			25	15				1	NT	56			1	NT	18
	45	28							48	33			47	55				1	NT	28			1	NT	45
	26	44							11	50			29	16				1	NT	44			1	NT	26
	24	40							66	27			27	36				1	NT	40			1	NT	24
	19	52							94	19			17	41				1	NT	52			1	NT	19
	32	44							41	10			16	70				1	NT	44			1	NT	32
	23	42							18	53			35	19				1	NT	42			1	NT	23
	38	21							22	46			35	42				1	NT	21			1	NT	38
	27	36							17	76			33	33				1	NT	36			1	NT	27
	35	48							20	65			9	68				1	NT	48			1	NT	35
	36	21							23	25			49	4				1	NT	21			1	NT	36
	48	51							48	42			38	15				1	NT	51			1	NT	48
	38	13							41	42			54	11				1	NT	13			1	NT	38
	14	69							12	30			25	20				1	NT	69			1	NT	14
	23	41							25	76			28	35				1	NT	41			1	NT	23
	30	67							21	55			5	76				1	NT	67			1	NT	30
	22	106							35	46			30	44				1	NT	106			1	NT	22
	61	53							87	85			28	38				1	NT	53			1	NT	61
	61	35							60	38			70	18				1	NT	35			1	NT	61
	15	35							15	31			18	46				1	NT	35			1	NT	15
	25	36							47	30			26	37				1	NT	36			1	NT	25
	36	43							16	55			23	37				1	NT	43			1	NT	36
	20	44							36	18			7	51				1	NT	44			1	NT	20
	41	20							23	22			20	45				1	NT	20			1	NT	41
	32	26							58	60			59	90				1	NT	26			1	NT	32
	11	40							29	108			8	67				1	NT	40			1	NT	11
	12	122							26	58			7	38				1	NT	122			1	NT	12
	30	65							66	37			43	30				1	NT	65			1	NT	30
	22	30							30	53			19	44				1	NT	30			1	NT	22
	35	58							33	75			7	34				1	NT	58			1	NT	35
	33	57							31	45			20	30				1	NT	57			1	NT	33
	35	35							24	129			25	51				1	NT	35			1	NT	35
	12	59							44	115			24	30				1	NT	59			1	NT	12
	17	46							50	35			17	28				1	NT	46			1	NT	17
	15	44							26	49			39	32				1	NT	44			1	NT	15
	15	46							85	38			36	38				1	NT	46			1	NT	15
	24	32							18	49			86	11				1	NT	32			1	NT	24
	16	41							8	58			36	24				1	NT	41			1	NT	16
	22	67							58	29			13	40				1	NT	67			1	NT	22
	26	64							32	80			83	19				1	NT	64			1	NT	26
	37	65							27	24			29	39				1	NT	65			1	NT	37
	60	30							40	60			26	17				1	NT	30			1	NT	60
	18	26							22	43			61	42				1	NT	26			1	NT	18
	25	37							19	38			29	30				1	NT	37			1	NT	25
	24	35							36	49			40	38				1	NT	35			1	NT	24
	20	47							19	34			23	48				1	NT	47			1	NT	20
	50	90							31	50			63	13				1	NT	90			1	NT	50
	8	72							24	53			15	44				1	NT	72			1	NT	8
	22	30							44	39			10	27				1	NT	30			1	NT	22
	34	32							18	29			46	18				1	NT	32			1	NT	34
	46	38							29	62			16	29				1	NT	38			1	NT	46
	20	67							10	35			36	22				1	NT	67			1	NT	20
	33	105							34	47			46	29				1	NT	105			1	NT	33
	21	44							28	50			23	34				1	NT	44			1	NT	21
	24	73							16	78			28	58				1	NT	73			1	NT	24
	103	64							54	27			23	33				1	NT	64			1	NT	103
	23	41							30	78			27	19				1	NT	41			1	NT	23
	31	36							9	42			20	31				1	NT	36			1	NT	31
	19	47							26	36			38	26				1	NT	47			1	NT	19
	29	56							38	15			29	34				1	NT	56			1	NT	29
	56	20							21	20			17	125				1	NT	20			1	NT	56
	60	37							27	39			8	58				1	NT	37			1	NT	60
	27	37							33	44			61	29				1	NT	37			1	NT	27
	27	38							69	10			31	42				1	NT	38			1	NT	27
	29	43							17	51			37	26				1	NT	43			1	NT	29
	81	27							35	43			66	32				1	NT	27			1	NT	81
	7	40							11	34			9	42				1	NT	40			1	NT	7
	75	158							15	40			31	47				1	NT	158			1	NT	75
	30	86							54	36			33	55				1	NT	86			1	NT	30
	36	73							36	44			61	23				1	NT	73			1	NT	36
	34	60							106	16			33	21				1	NT	60			1	NT	34
	46	53							25	52			32	26				1	NT	53			1	NT	46
	10	66							41	27			12	47				1	NT	66			1	NT	10
	26	56							13	30			79	29				1	NT	56			1	NT	26
	52	29							22	53			19	36				1	NT	29			1	NT	52
	7	73							34	10			45	24				1	NT	73			1	NT	7
	31	116							60	20			28	46				1	NT	116			1	NT	31
	35	40							51	12			34	60				1	NT	40			1	NT	35
	24	52							39	119			18	18				1	NT	52			1	NT	24
	18	56							22	46			27	16				1	NT	56			1	NT	18
	19	50							17	36			52	15				1	NT	50			1	NT	19
	23	45							11	37			34	44				1	NT	45			1	NT	23
	25	40							111	29			23	59				1	NT	40			1	NT	25
	21	74							19	98			14	39				1	NT	74			1	NT	21
	23	38							91	205			43	9				1	NT	38			1	NT	23
	30	38							22	77			33	20				1	NT	38			1	NT	30
	22	34							26	55			17	28				1	NT	34			1	NT	22
	17	37							48	56			24	22				1	NT	37			1	NT	17
	31	56							74	51			17	30				1	NT	56			1	NT	31
	16	37							28	72			20	49				1	NT	37			1	NT	16
	16	49							23	45			28	34				1	NT	49			1	NT	16
	17	33							29	63			52	11				1	NT	33			1	NT	17
	15	36							16	38			58	52				1	NT	36			1	NT	15
	17	34							17	47			65	33				1	NT	34			1	NT	17
	18	43							19	41			49	33				1	NT	43			1	NT	18
	21	89							23	38			25	43				1	NT	89			1	NT	21
	25	33							28	42			25	40				1	NT	33			1	NT	25
	17	26							28	30			31	40				1	NT	26			1	NT	17
	25	39							20	35			47	54				1	NT	39			1	NT	25
	26	38							11	51			12	38				1	NT	38			1	NT	26
	23	119							13	37			49	8				1	NT	119			1	NT	23
	28	22							56	46			34	33				1	NT	22			1	NT	28
	21	41							27	48			20	28				1	NT	41			1	NT	21
	33	14							21	51			17	59				1	NT	14			1	NT	33
	15	37							26	22			74	30				1	NT	37			1	NT	15
	28	70							30	123			34	17				1	NT	70			1	NT	28
	88	70							8	34			20	41				1	NT	70			1	NT	88
	27	86							58	24			86	12				1	NT	86			1	NT	27
	20	67							43	19			18	58				1	NT	67			1	NT	20
	31	52							16	27			28	40				1	NT	52			1	NT	31
	23	56							25	81			21	46				1	NT	56			1	NT	23
	31	48							37	33			25	38				1	NT	48			1	NT	31
	22	54							24	15			31	39				1	NT	54			1	NT	22
	162	8							14	52			49	40				1	NT	8			1	NT	162
	20	53							43	58			26	29				1	NT	53			1	NT	20
	29	46							42	37			5	40				1	NT	46			1	NT	29
	22	50							40	15			39	11				1	NT	50			1	NT	22
	28	34							84	44			79	14				1	NT	34			1	NT	28
	25	45							14	27			82	18				1	NT	45			1	NT	25
	84	51							38	14			6	70				1	NT	51			1	NT	84
	21	43							9	37			44	27				1	NT	43			1	NT	21
	58	63							22	21			14	53				1	NT	63			1	NT	58
	68	41							21	42			17	26				1	NT	41			1	NT	68
	22	38							68	6			23	29				1	NT	38			1	NT	22
	74	22							88	32			65	27				1	NT	22			1	NT	74
	23	39							34	44			35	50				1	NT	39			1	NT	23
	22	38							35	37			31	90				1	NT	38			1	NT	22
	27	30							21	50			21	34				1	NT	30			1	NT	27
	12	52							26	50			62	19				1	NT	52			1	NT	12
	43	31							6	47			89	9				1	NT	31			1	NT	43
	22	47							21	46			13	61				1	NT	47			1	NT	22
	18	37							17	75			51	39				1	NT	37			1	NT	18
	17	49							15	42			29	15				1	NT	49			1	NT	17
	35	51							18	27			5	49				1	NT	51			1	NT	35
	32	41							54	38			17	27				1	NT	41			1	NT	32
	52	30							24	41			10	33				1	NT	30			1	NT	52
	56	37							58	22			32	13				1	NT	37			1	NT	56
	60	27							28	48			59	22				1	NT	27			1	NT	60
	23	40							25	40			45	30				1	NT	40			1	NT	23
	23	25							13	39			56	19				1	NT	25			1	NT	23
	27	19							37	131			32	17				1	NT	19			1	NT	27
	13	30							18	75			47	30				1	NT	30			1	NT	13
	12	83							26	53			11	60				1	NT	83			1	NT	12
	23	19							48	62			35	138				1	NT	19			1	NT	23
	9	39							39	78			25	18				1	NT	39			1	NT	9
	16	25							50	53			55	29				1	NT	25			1	NT	16
	11	29							34	41			11	40				1	NT	29			1	NT	11
	50	29							64	44			20	33				1	NT	29			1	NT	50
	23	39							22	43			20	30				1	NT	39			1	NT	23
	27	49							26	41			12	31				1	NT	49			1	NT	27
	20	35							28	57			15	51				1	NT	35			1	NT	20
	20	36							20	40			42	66				1	NT	36			1	NT	20
	46	29							15	38			59	13				1	NT	29			1	NT	46
	27	28							29	51			17	50				1	NT	28			1	NT	27
	42	48							15	53			35	29				1	NT	48			1	NT	42
	23	52							36	57			61	4				1	NT	52			1	NT	23
	30	35							19	40			16	38				1	NT	35			1	NT	30
	63	16							34	28			32	31				1	NT	16			1	NT	63
	27	19							27	56			51	16				1	NT	19			1	NT	27
	39	34							8	59			20	90				1	NT	34			1	NT	39
	14	31							55	56			34	34				1	NT	31			1	NT	14
	6	68							101	7			39	22				1	NT	68			1	NT	6
	31	28							130	10			32	31				1	NT	28			1	NT	31
	63	39							11	94			25	36				1	NT	39			1	NT	63
	30	36							34	49								1	NT	36			1	NT	30
	7	46							35	86								1	NT	46			1	NT	7
	35	12							17	54								1	NT	12			1	NT	35
	23	153							25	41								1	NT	153			1	NT	23
	80	87							80	44								1	NT	87			1	NT	80
	84	99							53	33								1	NT	99			1	NT	84
	76	44							8	46								1	NT	44			1	NT	76
	130	72							74	12								1	NT	72			1	NT	130
	26	65							97	23								1	NT	65			1	NT	26
	25	54							50	51								1	NT	54			1	NT	25
	34	118							23	65								1	NT	118			1	NT	34
	28	43							37	43								1	NT	43			1	NT	28
	116	35							133	36								1	NT	35			1	NT	116
	28	33							34	35								1	NT	33			1	NT	28
	117	61							51	47								1	NT	61			1	NT	117
	33	33							22	39								1	NT	33			1	NT	33
	29	34							68	14								1	NT	34			1	NT	29
	21	40							15	38								1	NT	40			1	NT	21
	54	28							18	31								1	NT	28			1	NT	54
	31	29							17	166								1	NT	29			1	NT	31
	17	48							75	10								1	NT	48			1	NT	17
	20	104							25	49								1	NT	104			1	NT	20
	33	42							15	41								1	NT	42			1	NT	33
	30	109							24	27								1	NT	109			1	NT	30
	22	42							11	47								1	NT	42			1	NT	22
	47	57							56	20								1	NT	57			1	NT	47
	18	39							43	24								1	NT	39			1	NT	18
	35	102							129	65								1	NT	102			1	NT	35
	32	34							38	61								1	NT	34			1	NT	32
	11	43							50	48								1	NT	43			1	NT	11
	22	31							50	74								1	NT	31			1	NT	22
	8	40							33	50								1	NT	40			1	NT	8
	79	91							84	54								1	NT	91			1	NT	79
	11	37							28	47								1	NT	37			1	NT	11
	36	77							63	60								1	NT	77			1	NT	36
	28	56							17	47								1	NT	56			1	NT	28
	42	69							20	33								1	NT	69			1	NT	42
	36	21							35	17								1	NT	21			1	NT	36
	19	59							34	40								1	NT	59			1	NT	19
	28	23							16	41								1	NT	23			1	NT	28
	36	16							27	30								1	NT	16			1	NT	36
	16	77							25	19								1	NT	77			1	NT	16
	45	12							13	39								1	NT	12			1	NT	45
	26	27							32	30								1	NT	27			1	NT	26
	48	10							49	42								1	NT	10			1	NT	48
	33	165							41	42								1	NT	165			1	NT	33
	47	77							42	44								1	NT	77			1	NT	47
	40	72							33	37								1	NT	72			1	NT	40
	49	53							87	17								1	NT	53			1	NT	49
	76	46							26	28								1	NT	46			1	NT	76
	15	66							30	40								1	NT	66			1	NT	15
	17	91							33	26								1	NT	91			1	NT	17
	29	53							48	50								1	NT	53			1	NT	29
	38	43							49	120								1	NT	43			1	NT	38
	22	94							43	47								1	NT	94			1	NT	22
	51	28							30	59								1	NT	28			1	NT	51
	85	75							27	64								1	NT	75			1	NT	85
	49	29							30	54								1	NT	29			1	NT	49
	91	63							42	74								1	NT	63			1	NT	91
	44	58							41	41								1	NT	58			1	NT	44
	33	43							34	49								1	NT	43			1	NT	33
	24	41							29	54								1	NT	41			1	NT	24
	28	38							30	52								1	NT	38			1	NT	28
	14	108							27	50								1	NT	108			1	NT	14
	37	59							25	52								1	NT	59			1	NT	37
	12	52							31	128								1	NT	52			1	NT	12
	48	56							20	53								1	NT	56			1	NT	48
	20	37							39	31								1	NT	37			1	NT	20
	17	42							32	38								1	NT	42			1	NT	17
	31	25							66	60								1	NT	25			1	NT	31
	23	58							18	48								1	NT	58			1	NT	23
	17	37							62	26								1	NT	37			1	NT	17
	48	46							41	50								1	NT	46			1	NT	48
	88	40							48	37								1	NT	40			1	NT	88
	17	28							29	53								1	NT	28			1	NT	17
	31	46							18	41								1	NT	46			1	NT	31
	27	46							39	55								1	NT	46			1	NT	27
	19	38							29	29								1	NT	38			1	NT	19
	29	38							76	5								1	NT	38			1	NT	29
	18	40							229	29								1	NT	40			1	NT	18
	28	36							26	117								1	NT	36			1	NT	28
	34	56							45	60								1	NT	56			1	NT	34
	30	48							42	42								1	NT	48			1	NT	30
	74	3							60	34								1	NT	3			1	NT	74
	72	56							64	24								1	NT	56			1	NT	72
	98	74							26	45								1	NT	74			1	NT	98
	27	140							60	27								1	NT	140			1	NT	27
	78	63							115	27								1	NT	63			1	NT	78
	37	58							26	63								1	NT	58			1	NT	37
	22	91							31	35								1	NT	91			1	NT	22
	31	142							15	74								1	NT	142			1	NT	31
	40	39							154	15								1	NT	39			1	NT	40
	34	81							21	44								1	NT	81			1	NT	34
	29	33							21	42								1	NT	33			1	NT	29
	21	47							76	40								1	NT	47			1	NT	21
	19	46							81	20								1	NT	46			1	NT	19
	24	39							17	77								1	NT	39			1	NT	24
	83	41							7	55								1	NT	41			1	NT	83
	24	35							21	41								1	NT	35			1	NT	24
	12	47							30	22								1	NT	47			1	NT	12
	21	60							37	21								1	NT	60			1	NT	21
	27	31							14	43								1	NT	31			1	NT	27
	36	22							11	127								1	NT	22			1	NT	36
	19	39							21	37								1	NT	39			1	NT	19
	15	40							22	87								1	NT	40			1	NT	15
	24	33							25	31								1	NT	33			1	NT	24
	112	59							20	29								1	NT	59			1	NT	112
	52	101							7	44								1	NT	101			1	NT	52
	31	20							20	32								1	NT	20			1	NT	31
	12	52							21	29								1	NT	52			1	NT	12
	13	38							37	29								1	NT	38			1	NT	13
	9	37							21	30								1	NT	37			1	NT	9
	20	25							33	34								1	NT	25			1	NT	20
	15	31							21	28								1	NT	31			1	NT	15
	52	43							43	32								1	NT	43			1	NT	52
	22	42							23	25								1	NT	42			1	NT	22
	57	31							15	34								1	NT	31			1	NT	57
	26	37							43	20								1	NT	37			1	NT	26
	34	52							21	36								1	NT	52			1	NT	34
	13	50							9	37								1	NT	50			1	NT	13
	26	28							14	28								1	NT	28			1	NT	26
	59	26							13	31								1	NT	26			1	NT	59
	101	119							42	22								1	NT	119			1	NT	101
	20	103							38	95								1	NT	103			1	NT	20
	22	164							22	26								1	NT	164			1	NT	22
	47	51							8	28								1	NT	51			1	NT	47
	69	23							5	49								1	NT	23			1	NT	69
	37	52							31	42								1	NT	52			1	NT	37
	32	51							16	39								1	NT	51			1	NT	32
	31	56							68	25								1	NT	56			1	NT	31
	151	22							19	30								1	NT	22			1	NT	151
	41	43							20	20								1	NT	43			1	NT	41
	28	69							59	6								1	NT	69			1	NT	28
	20	52							18	33								1	NT	52			1	NT	20
	25	44							42	45								1	NT	44			1	NT	25
	56	52							45	14								1	NT	52			1	NT	56
	33	32							23	29								1	NT	32			1	NT	33
	81	17							58	31								1	NT	17			1	NT	81
	24	86							25	44								1	NT	86			1	NT	24
	25	37							49	48								1	NT	37			1	NT	25
	20	39							22	42								1	NT	39			1	NT	20
	23	37							38	6								1	NT	37			1	NT	23
	65	44							13	32								1	NT	44			1	NT	65
	11	74							37	15								1	NT	74			1	NT	11
	203	65							35	18								1	NT	65			1	NT	203
	30	33							27	64								1	NT	33			1	NT	30
	8	40							48	146								1	NT	40			1	NT	8
	17	30							173	33								1	NT	30			1	NT	17
	9	41							9	114								1	NT	41			1	NT	9
	46	9							4	108								1	NT	9			1	NT	46
	14	29							69	34								1	NT	29			1	NT	14
	57	48							98	31								1	NT	48			1	NT	57
	35	23							21	65								1	NT	23			1	NT	35
	6	40							4	82								1	NT	40			1	NT	6
	49	4							50	33								1	NT	4			1	NT	49
	39	21							28	57								1	NT	21			1	NT	39
	37	38							20	80								1	NT	38			1	NT	37
	17	78							24	91								1	NT	78			1	NT	17
	16	39							51	75								1	NT	39			1	NT	16
	18	36							47	45								1	NT	36			1	NT	18
	14	41							67	146								1	NT	41			1	NT	14
	27	45							24	60								1	NT	45			1	NT	27
	48	20							46	52								1	NT	20			1	NT	48
	25	66							14	58								1	NT	66			1	NT	25
	34	61							17	99								1	NT	61			1	NT	34
	36	42							16	57								1	NT	42			1	NT	36
	27	52							98	28								1	NT	52			1	NT	27
	36	78							21	43								1	NT	78			1	NT	36
	21	55							26	41								1	NT	55			1	NT	21
	62	76							68	12								1	NT	76			1	NT	62
	92	23							44	19								1	NT	23			1	NT	92
	80	48							34	50								1	NT	48			1	NT	80
	9	62							5	47								1	NT	62			1	NT	9
	47	79							21	137								1	NT	79			1	NT	47
	22	47							82	38								1	NT	47			1	NT	22
	25	43							16	47								1	NT	43			1	NT	25
	32	31							38	36								1	NT	31			1	NT	32
	47	64							21	40								1	NT	64			1	NT	47
	22	42							91	43								1	NT	42			1	NT	22
	58	112							91	89								1	NT	112			1	NT	58
	21	40							45	28								1	NT	40			1	NT	21
	20	52							46	51								1	NT	52			1	NT	20
	22	38							49	37								1	NT	38			1	NT	22
	37	35							24	34								1	NT	35			1	NT	37
	19	32							29	161								1	NT	32			1	NT	19
	15	36							21	33								1	NT	36			1	NT	15
	19	22							39	43								1	NT	22			1	NT	19
	28	52							20	25								1	NT	52			1	NT	28
	19	56							6	40								1	NT	56			1	NT	19
	27	46							19	34								1	NT	46			1	NT	27
	19	29							58	27								1	NT	29			1	NT	19
	40	16							43	40								1	NT	16			1	NT	40
	30	49							27	37								1	NT	49			1	NT	30
	20	51							57	32								1	NT	51			1	NT	20
	36	13							21	31								1	NT	13			1	NT	36
	230	33							26	25								1	NT	33			1	NT	230
	15	101							47	8								1	NT	101			1	NT	15
	34	63							23	27								1	NT	63			1	NT	34
	30	62							25	34								1	NT	62			1	NT	30
	47	69							43	27								1	NT	69			1	NT	47
	22	59							24	167								1	NT	59			1	NT	22
	35	43							44	17								1	NT	43			1	NT	35
	17	56							52	62								1	NT	56			1	NT	17
	29	42							22	41								1	NT	42			1	NT	29
	44	47							8	34								1	NT	47			1	NT	44
	69	41							23	23								1	NT	41			1	NT	69
	26	36							67	16								1	NT	36			1	NT	26
	14	46							76	26								1	NT	46			1	NT	14
	43	63							26	63								1	NT	63			1	NT	43
	33	40							18	30								1	NT	40			1	NT	33
	29	24							23	18								1	NT	24			1	NT	29
	30	36							23	26								1	NT	36			1	NT	30
	19	32							21	25								1	NT	32			1	NT	19
	55	40							21	37								1	NT	40			1	NT	55
	32	22							19	26								1	NT	22			1	NT	32
	99	24							25	36								1	NT	24			1	NT	99
	40	18							18	29								1	NT	18			1	NT	40
	38	12							27	38								1	NT	12			1	NT	38
	29	30							10	23								1	NT	30			1	NT	29
	21	40							16	80								1	NT	40			1	NT	21
	61	26							16	30								1	NT	26			1	NT	61
	41	94							170	15								1	NT	94			1	NT	41
	13	99							20	20								1	NT	99			1	NT	13
	79	55							23	21								1	NT	55			1	NT	79
	54	107							16	82								1	NT	107			1	NT	54
	74	88							10	31								1	NT	88			1	NT	74
	17	79							14	28								1	NT	79			1	NT	17
	88	12							10	42								1	NT	12			1	NT	88
	32	50							27	15								1	NT	50			1	NT	32
	55	33							45	22								1	NT	33			1	NT	55
	99	55							20	39								1	NT	55			1	NT	99
	30	73							24	15								1	NT	73			1	NT	30
	21	60							29	39								1	NT	60			1	NT	21
	20	52							10	37								1	NT	52			1	NT	20
	73	38							3	90								1	NT	38			1	NT	73
	32	46							42	77								1	NT	46			1	NT	32
	28	47							33	12								1	NT	47			1	NT	28
	17	183							19	37								1	NT	183			1	NT	17
	25	88							57	33								1	NT	88			1	NT	25
	18	46							36	37								1	NT	46			1	NT	18
	28	46							25	38								1	NT	46			1	NT	28
	18	52							23	31								1	NT	52			1	NT	18
	45	100							115	14								1	NT	100			1	NT	45
	31	47							5	63								1	NT	47			1	NT	31
	34	23							42	32								1	NT	23			1	NT	34
	38	63							21	25								1	NT	63			1	NT	38
	58	35							33	14								1	NT	35			1	NT	58
	21	103							15	41								1	NT	103			1	NT	21
	22	42							32	19								1	NT	42			1	NT	22
	44	67							70	19								1	NT	67			1	NT	44
	27	32							37	11								1	NT	32			1	NT	27
	107	6							53	21								1	NT	6			1	NT	107
	10	49							28	23								1	NT	49			1	NT	10
	21	41							9	47								1	NT	41			1	NT	21
	28	30							18	60								1	NT	30			1	NT	28
	33	54							23	26								1	NT	54			1	NT	33
	3	59							31	26								1	NT	59			1	NT	3
	10	53							19	34								1	NT	53			1	NT	10
	17	40							25	24								1	NT	40			1	NT	17
	25	33							37	17								1	NT	33			1	NT	25
	9	46							72	41								1	NT	46			1	NT	9
	25	31							9	66								1	NT	31			1	NT	25
	19	69							11	34								1	NT	69			1	NT	19
	21	35							36	7								1	NT	35			1	NT	21
	24	45							43	5								1	NT	45			1	NT	24
	63	29							14	34								1	NT	29			1	NT	63
	16	34							44	8								1	NT	34			1	NT	16
	30	66							16	42								1	NT	66			1	NT	30
	33	56							97	19								1	NT	56			1	NT	33
	27	24							41	11								1	NT	24			1	NT	27
	43	63							181	63								1	NT	63			1	NT	43
	24	23							110	95								1	NT	23			1	NT	24
	7	49							10	109								1	NT	49			1	NT	7
	51	26							18	72								1	NT	26			1	NT	51
	20	24							32	79								1	NT	24			1	NT	20
	25	28							49	51								1	NT	28			1	NT	25
	22	23							48	53								1	NT	23			1	NT	22
	44	15							26	40								1	NT	15			1	NT	44
	38	62							108	92								1	NT	62			1	NT	38
	22	40							34	43								1	NT	40			1	NT	22
	17	54							29	61								1	NT	54			1	NT	17
	61	20							28	22								1	NT	20			1	NT	61
	32	42							102	24								1	NT	42			1	NT	32
	69	45							18	35								1	NT	45			1	NT	69
	42	14							19	36								1	NT	14			1	NT	42
	22	24							18	35								1	NT	24			1	NT	22
	20	50							19	32								1	NT	50			1	NT	20
	27	60							20	33								1	NT	60			1	NT	27
	12	60							36	45								1	NT	60			1	NT	12
	19	38							18	35								1	NT	38			1	NT	19
	53	394							68	36								1	NT				1	NT	53
	43	43							84	42								1	NT	43			1	NT	43
	113	21							20	30								1	NT	21			1	NT	113
	24	79							16	31								1	NT	79			1	NT	24
	28	243							22	25								1	NT	243			1	NT	28
	31	73							17	31								1	NT	73			1	NT	31
	35	60							40	28								1	NT	60			1	NT	35
	44	51							71	10								1	NT	51			1	NT	44
	38	54							50	44								1	NT	54			1	NT	38
	31	61							16	18								1	NT	61			1	NT	31
	52	72							16	29								1	NT	72			1	NT	52
	35	52							72	30								1	NT	52			1	NT	35
	27	61							96	14								1	NT	61			1	NT	27
	21	61							16	58								1	NT	61			1	NT	21
	28	43							70	48								1	NT	43			1	NT	28
	5	110							16	38								1	NT	110			1	NT	5
	24	45							85	9								1	NT	45			1	NT	24
	32	30							18	34								1	NT	30			1	NT	32
	38	54							10	63								1	NT	54			1	NT	38
	87	48							46	11								1	NT	48			1	NT	87
	21	39							44	22								1	NT	39			1	NT	21
	32	31							25	29								1	NT	31			1	NT	32
	46	92							29	23								1	NT	92			1	NT	46
	17	61							18	35								1	NT	61			1	NT	17
	22	40							15	49								1	NT	40			1	NT	22
	41	47							14	179								1	NT	47			1	NT	41
	55	9							45	31								1	NT	9			1	NT	55
	28	35							36	11								1	NT	35			1	NT	28
	21	34							15	30								1	NT	34			1	NT	21
	22	54																1	NT	54			1	NT	22
	15	43																1	NT	43			1	NT	15
	12	55																1	NT	55			1	NT	12
	107	24																1	NT	24			1	NT	107
	39	70																1	NT	70			1	NT	39
	37	43																1	NT	43			1	NT	37
	4	40																1	NT	40			1	NT	4
	51	49																1	NT	49			1	NT	51
	20	28																1	NT	28			1	NT	20
	92	38																1	NT	38			1	NT	92
	17	27																1	NT	27			1	NT	17
	32	40																1	NT	40			1	NT	32
	63	32																1	NT	32			1	NT	63
	27	43																1	NT	43			1	NT	27
	30	25																1	NT	25			1	NT	30
	41	35																1	NT	35			1	NT	41
	46	20																1	NT	20			1	NT	46
	44	41																1	NT	41			1	NT	44
	70	30																1	NT	30			1	NT	70
	40	19																1	NT	19			1	NT	40
	132	35																1	NT	35			1	NT	132
	21	22																1	NT	22			1	NT	21
	19	32																1	NT	32			1	NT	19
	35	68																1	NT	68			1	NT	35
	31	68																1	NT	68			1	NT	31
	46	51																1	NT	51			1	NT	46
	39	47																1	NT	47			1	NT	39
	24	99																1	NT	99			1	NT	24
	26	55																1	NT	55			1	NT	26
	34	45																1	NT	45			1	NT	34
	65	87																1	NT	87			1	NT	65
	90	131																1	NT	131			1	NT	90
	22	49																1	NT	49			1	NT	22
	32	30																1	NT	30			1	NT	32
	79	39																1	NT	39			1	NT	79
	28	39																1	NT	39			1	NT	28
	49	41																1	NT	41			1	NT	49
	12	45																1	NT	45			1	NT	12
	24	38																1	NT	38			1	NT	24
	27	54																1	NT	54			1	NT	27
	7	71																1	NT	71			1	NT	7
	14	56																1	NT	56			1	NT	14
	53	36																1	NT	36			1	NT	53
	21	32																1	NT	32			1	NT	21
	18	53																1	NT	53			1	NT	18
	36	47																1	NT	47			1	NT	36
	29	62																1	NT	62			1	NT	29
	15	42																1	NT	42			1	NT	15
	15	46																1	NT	46			1	NT	15
	46	35																1	NT	35			1	NT	46
	69	52																1	NT	52			1	NT	69
	73	26																1	NT	26			1	NT	73
	24	26																1	NT	26			1	NT	24
	34	48																1	NT	48			1	NT	34
	30	46																1	NT	46			1	NT	30
	64	30																1	NT	30			1	NT	64
	17	61																1	NT	61			1	NT	17
	17	43																1	NT	43			1	NT	17
	13	126																1	NT	126			1	NT	13
	21	45																1	NT	45			1	NT	21
	10	38																1	NT	38			1	NT	10
	34	43																1	NT	43			1	NT	34
	15	67																1	NT	67			1	NT	15
	32	9																1	NT	9			1	NT	32
	131	53																1	NT	53			1	NT	131
	22	96																1	NT	96			1	NT	22
	29	56																1	NT	56			1	NT	29
	25	52																1	NT	52			1	NT	25
	38	39																1	NT	39			1	NT	38
	16	43																1	NT	43			1	NT	16
	28	29																1	NT	29			1	NT	28
	36	52																1	NT	52			1	NT	36
	17	37																1	NT	37			1	NT	17
	27	52																1	NT	52			1	NT	27
	26	26																1	NT	26			1	NT	26
	18	70																1	NT	70			1	NT	18
	23	24																1	NT	24			1	NT	23
	49	33																1	NT	33			1	NT	49
	34	30																1	NT	30			1	NT	34
	20	25																1	NT	25			1	NT	20
	55	19																1	NT	19			1	NT	55
	47	28																1	NT	28			1	NT	47
	47	34																1	NT	34			1	NT	47
	32	59																1	NT	59			1	NT	32
	39	69																1	NT	69			1	NT	39
	25	74																1	NT	74			1	NT	25
	38	83																1	NT	83			1	NT	38
	37	42																1	NT	42			1	NT	37
	52	21																1	NT	21			1	NT	52
	29	41																1	NT	41			1	NT	29
	57	128																1	NT	128			1	NT	57
	49	96																1	NT	96			1	NT	49
	21	46																1	NT	46			1	NT	21
	35	53																1	NT	53			1	NT	35
	25	38																1	NT	38			1	NT	25
	25	36																1	NT	36			1	NT	25
	44	64																1	NT	64			1	NT	44
	31	23																1	NT	23			1	NT	31
	25	99																1	NT	99			1	NT	25
	23	34																1	NT	34			1	NT	23
	26	42																1	NT	42			1	NT	26
	14	36																1	NT	36			1	NT	14
	31	22																1	NT	22			1	NT	31
	90	46																1	NT	46			1	NT	90
	31	105																1	NT	105			1	NT	31
	23	141																1	NT	141			1	NT	23
	26	65																1	NT	65			1	NT	26
	31	64																1	NT	64			1	NT	31
	79	34																1	NT	34			1	NT	79
	47	25																1	NT	25			1	NT	47
	47	52																1	NT	52			1	NT	47
	36	34																1	NT	34			1	NT	36
	36	47																1	NT	47			1	NT	36
	29	33																1	NT	33			1	NT	29
	22	42																1	NT	42			1	NT	22
	37	32																1	NT	32			1	NT	37
	14	60																1	NT	60			1	NT	14
	41	32																1	NT	32			1	NT	41
	50	56																1	NT	56			1	NT	50
	39	93																1	NT	93			1	NT	39
	27	15																1	NT	15			1	NT	27
	19	27																1	NT	27			1	NT	19
	36	55																1	NT	55			1	NT	36
	38	82																1	NT	82			1	NT	38
	25	57																1	NT	57			1	NT	25
	30	46																1	NT	46			1	NT	30
	29	44																1	NT	44			1	NT	29
	21	49																1	NT	49			1	NT	21
	21	46																1	NT	46			1	NT	21
	24	41																1	NT	41			1	NT	24
	23	39																1	NT	39			1	NT	23
	19	38																1	NT	38			1	NT	19
	19	34																1	NT	34			1	NT	19
	60	7																1	NT	7			1	NT	60
	51	48																1	NT	48			1	NT	51
	34	49																1	NT	49			1	NT	34
																		1	SN	75			1	SN	91
																		1	SN	22			1	SN	75
																		1	SN	39			1	SN	16
																		1	SN	31			1	SN	81
																		1	SN	38			1	SN	113
																		1	SN	19			1	SN	81
																		1	SN	93			1	SN	16
																		1	SN	74			1	SN	16
																		1	SN	38			1	SN	26
																		1	SN	79			1	SN	12
																		1	SN	19			1	SN	51
																		1	SN	50			1	SN	10
																		1	SN	73			1	SN	46
																		1	SN	22			1	SN	80
																		1	SN	20			1	SN	64
																		1	SN	14			1	SN	88
																		1	SN	28			1	SN	18
																		1	SN	79			1	SN	34
																		1	SN	11			1	SN	103
																		1	SN	55			1	SN	7
																		1	SN	67			1	SN	51
																		1	SN	11			1	SN	31
																		1	SN	17			1	SN	32
																		1	SN	19			1	SN	38
																		1	SN	32			1	SN	18
																		1	SN	30			1	SN	102
																		1	SN	39			1	SN	35
																		1	SN	51			1	SN	33
																		1	SN	51			1	SN	21
																		1	SN	24			1	SN	39
																		1	SN	13			1	SN	57
																		1	SN	13			1	SN	51
																		1	SN	69			1	SN	18
																		1	SN	33			1	SN	17
																		1	SN	23			1	SN	19
																		1	SN	7			1	SN	45
																		1	SN	45			1	SN	7
																		1	SN	24			1	SN	35
																		1	SN	75			1	SN	20
																		1	SN	55			1	SN	89
																		1	SN	60			1	SN	7
																		1	SN	78			1	SN	6
																		1	SN	20			1	SN	69
																		1	SN	19			1	SN	57
																		1	SN	36			1	SN	24
																		1	SN	49			1	SN	25
																		1	SN	39			1	SN	13
																		1	SN	42			1	SN	5
																		1	SN	37			1	SN	27
																		1	SN	24			1	SN	20
																		1	SN	41			1	SN	103
																		1	SN	19			1	SN	48
																		1	SN	5			1	SN	111
																		1	SN	44			1	SN	20
																		1	SN	51			1	SN	24
																		1	SN	31			1	SN	38
																		1	SN	16			1	SN	49
																		1	SN	63			1	SN	23
																		1	SN	66			1	SN	28
																		1	SN	93			1	SN	134
																		1	SN	20			1	SN	59
																		1	SN	47			1	SN	6
																		1	SN	17			1	SN	42
																		1	SN	26			1	SN	25
																		1	SN	12			1	SN	64
																		1	SN	50			1	SN	36
																		1	SN	35			1	SN	25
																		1	SN	43			1	SN	12
																		1	SN	19			1	SN	142
																		1	SN	24			1	SN	27
																		1	SN	40			1	SN	23
																		1	SN	20			1	SN	29
																		1	SN	39			1	SN	18
																		1	SN	32			1	SN	87
																		1	SN	13			1	SN	91
																		1	SN	38			1	SN	16
																		1	SN	13			1	SN	47
																		1	SN	60			1	SN	17
																		1	SN	29			1	SN	26
																		1	SN	9			1	SN	44
																		1	SN	48			1	SN	48
																		1	SN	9			1	SN	52
																		1	SN	34			1	SN	16
																		1	SN	14			1	SN	61
																		1	SN	20			1	SN	26
																		1	SN	26			1	SN	16
																		1	SN	36			1	SN	29
																		1	SN	51			1	SN	18
																		1	SN	40			1	SN	14
																		1	SN	9			1	SN	59
																		1	SN	14			1	SN	29
																		1	SN	22			1	SN	41
																		1	SN	38			1	SN	14
																		1	SN	45			1	SN	6
																		1	SN	25			1	SN	36
																		1	SN	28			1	SN	35
																		1	SN	31			1	SN	22
																		1	SN	14			1	SN	33
																		1	SN	39			1	SN	27
																		1	SN	32			1	SN	12
																		1	SN	39			1	SN	8
																		1	SN	45			1	SN	31
																		1	SN	40			1	SN	18
																		1	SN	7			1	SN	40
																		1	SN	9			1	SN	50
																		1	SN	66			1	SN	35
																		1	SN	36			1	SN	38
																		1	SN	22			1	SN	76
																		1	SN	89			1	SN	127
																		1	SN	18			1	SN	41
																		1	SN	26			1	SN	87
																		1	SN	35			1	SN	22
																		1	SN	36			1	SN	26
																		1	SN	36			1	SN	18
																		1	SN	36			1	SN	19
																		1	SN	17			1	SN	22
																		1	SN	20			1	SN	31
																		1	SN	12			1	SN	135
																		1	SN	15			1	SN	45
																		1	SN	25			1	SN	35
																		1	SN	42			1	SN	16
																		1	SN	2			1	SN	53
																		1	SN	48			1	SN	27
																		1	SN	42			1	SN	11
																		1	SN	48			1	SN	12
																		1	SN	30			1	SN	15
																		1	SN	14			1	SN	28
																		1	SN	40			1	SN	4
																		1	SN	11			1	SN	40
																		1	SN	37			1	SN	31
																		1	SN	9			1	SN	56
																		1	SN	29			1	SN	11
																		1	SN	13			1	SN	35
																		1	SN	45			1	SN	88
																		1	SN	49			1	SN	12
																		1	SN	11			1	SN	49
																		1	SN	29			1	SN	36
																		1	SN	39			1	SN	12
																		1	SN	43			1	SN	6
																		1	SN	13			1	SN	31
																		1	SN	22			1	SN	24
																		1	SN	39			1	SN	10
																		1	SN	26			1	SN	16
																		1	SN	25			1	SN	19
																		1	SN	43			1	SN	25
																		1	SN	24			1	SN	46
																		1	SN	54			1	SN	15
																		1	SN	32			1	SN	7
																		1	SN	57			1	SN	5
																		1	SN	41			1	SN	43
																		1	SN	37			1	SN	30
																		1	SN	14			1	SN	44
																		1	SN	12			1	SN	32
																		1	SN	33			1	SN	42
																		1	SN	33			1	SN	15
																		1	SN	10			1	SN	32
																		1	SN	35			1	SN	19
																		1	SN	38			1	SN	33
																		1	SN	23			1	SN	77
																		1	SN	72			1	SN	58
																		1	SN	53			1	SN	7
																		1	SN	44			1	SN	40
																		1	SN	13			1	SN	50
																		1	SN	47			1	SN	19
																		1	SN	53			1	SN	7
																		1	SN	49			1	SN	50
																		1	SN	53			1	SN	23
																		1	SN	32			1	SN	19
																		1	SN	19			1	SN	28
																		1	SN	26			1	SN	30
																		1	SN	19			1	SN	102
																		1	SN	39			1	SN	19
																		1	SN	9			1	SN	44
																		1	SN	27			1	SN	61
																		1	SN	34			1	SN	28
																		1	SN	32			1	SN	38
																		1	SN	45			1	SN	18
																		1	SN	44			1	SN	51
																		1	SN	24			1	SN	97
																		1	SN	21			1	SN	50
																		1	SN	10			1	SN	57
																		1	SN	48			1	SN	20
																		1	SN	41			1	SN	23
																		1	SN	26			1	SN	45
																		1	SN	19			1	SN	27
																		1	SN	24			1	SN	20
																		1	SN	30			1	SN	57
																		1	SN	16			1	SN	30
																		1	SN	10			1	SN	85
																		1	SN	20			1	SN	88
																		1	SN	37			1	SN	29
																		1	SN	23			1	SN	67
																		1	SN	33			1	SN	29
																		1	SN	43			1	SN	14
																		1	SN	31			1	SN	22
																		1	SN	29			1	SN	20
																		1	SN	62			1	SN	24
																		1	SN	31			1	SN	15
																		1	SN	23			1	SN	13
																		1	SN	33			1	SN	11
																		1	SN	23			1	SN	23
																		1	SN	14			1	SN	96
																		1	SN	52			1	SN	19
																		1	SN	31			1	SN	13
																		1	SN	43			1	SN	3
																		1	SN	23			1	SN	23
																		1	SN	16			1	SN	24
																		1	SN	23			1	SN	76
																		1	SN	58			1	SN	38
																		1	SN	25			1	SN	54
																		1	SN	25			1	SN	46
																		1	SN	32			1	SN	38
																		1	SN	49			1	SN	61
																		1	SN	32			1	SN	38
																		1	SN	9			1	SN	122
																		1	AZD	47			1	AZD	66
																		1	AZD	38			1	AZD	54
																		1	AZD	81			1	AZD	10
																		1	AZD	117			1	AZD	15
																		1	AZD	55			1	AZD	11
																		1	AZD	47			1	AZD	14
																		1	AZD	42			1	AZD	18
																		1	AZD	43			1	AZD	15
																		1	AZD	44			1	AZD	19
																		1	AZD	44			1	AZD	26
																		1	AZD	37			1	AZD	17
																		1	AZD	43			1	AZD	10
																		1	AZD	47			1	AZD	28
																		1	AZD	32			1	AZD	17
																		1	AZD	43			1	AZD	6
																		1	AZD	27			1	AZD	54
																		1	AZD	29			1	AZD	15
																		1	AZD	50			1	AZD	21
																		1	AZD	29			1	AZD	42
																		1	AZD	55			1	AZD	49
																		1	AZD	79			1	AZD	12
																		1	AZD	29			1	AZD	20
																		1	AZD	74			1	AZD	53
																		1	AZD	35			1	AZD	57
																		1	AZD	69			1	AZD	56
																		1	AZD	16			1	AZD	55
																		1	AZD	21			1	AZD	65
																		1	AZD	44			1	AZD	75
																		1	AZD	86			1	AZD	13
																		1	AZD	85			1	AZD	47
																		1	AZD	105			1	AZD	24
																		1	AZD	67			1	AZD	20
																		1	AZD	48			1	AZD	12
																		1	AZD	20			1	AZD	110
																		1	AZD	71			1	AZD	10
																		1	AZD	39			1	AZD	19
																		1	AZD	58			1	AZD	17
																		1	AZD	33			1	AZD	14
																		1	AZD	37			1	AZD	28
																		1	AZD	36			1	AZD	18
																		1	AZD	40			1	AZD	20
																		1	AZD	36			1	AZD	19
																		1	AZD	41			1	AZD	64
																		1	AZD	28			1	AZD	20
																		1	AZD	44			1	AZD	13
																		1	AZD	31			1	AZD	50
																		1	AZD	13			1	AZD	41
																		1	AZD	31			1	AZD	16
																		1	AZD	30			1	AZD	38
																		1	AZD	67			1	AZD	30
																		1	AZD	24			1	AZD	21
																		1	AZD	30			1	AZD	15
																		1	AZD	31			1	AZD	12
																		1	AZD	30			1	AZD	19
																		1	AZD	26			1	AZD	18
																		1	AZD	29			1	AZD	13
																		1	AZD	22			1	AZD	20
																		1	AZD	23			1	AZD	54
																		1	AZD	33			1	AZD	23
																		1	AZD	63			1	AZD	6
																		1	AZD	40			1	AZD	21
																		1	AZD	34			1	AZD	23
																		1	AZD	80			1	AZD	17
																		1	AZD	22			1	AZD	37
																		1	AZD	31			1	AZD	15
																		1	AZD	31			1	AZD	16
																		1	AZD	45			1	AZD	15
																		1	AZD	35			1	AZD	79
																		1	AZD	65			1	AZD	54
																		1	AZD	20			1	AZD	36
																		1	AZD	34			1	AZD	45
																		1	AZD	37			1	AZD	18
																		1	AZD	15			1	AZD	43
																		1	AZD	39			1	AZD	18
																		1	AZD	16			1	AZD	63
																		1	AZD	60			1	AZD	14
																		1	AZD	42			1	AZD	11
																		1	AZD	31			1	AZD	18
																		1	AZD	132			1	AZD	61
																		1	AZD	65			1	AZD	37
																		1	AZD	42			1	AZD	84
																		1	AZD	47			1	AZD	18
																		1	AZD	39			1	AZD	26
																		1	AZD	24			1	AZD	40
																		1	AZD	44			1	AZD	15
																		1	AZD	48			1	AZD	11
																		1	AZD	38			1	AZD	19
																		1	AZD	31			1	AZD	26
																		1	AZD	39			1	AZD	19
																		1	AZD	45			1	AZD	12
																		1	AZD	67			1	AZD	18
																		1	AZD	42			1	AZD	25
																		1	AZD	36			1	AZD	17
																		1	AZD	90			1	AZD	16
																		1	AZD	80			1	AZD	33
																		1	AZD	35			1	AZD	39
																		1	AZD	25			1	AZD	23
																		1	AZD	25			1	AZD	22
																		1	AZD	34			1	AZD	10
																		1	AZD	35			1	AZD	12
																		1	AZD	36			1	AZD	9
																		1	AZD	18			1	AZD	97
																		1	AZD	7			1	AZD	38
																		1	AZD	42			1	AZD	19
																		1	AZD	23			1	AZD	202
																		1	AZD	25			1	AZD	71
																		1	AZD	48			1	AZD	21
																		1	AZD	43			1	AZD	10
																		1	AZD	18			1	AZD	49
																		1	AZD	48			1	AZD	14
																		1	AZD	7			1	AZD	57
																		1	AZD	35			1	AZD	17
																		1	AZD	27			1	AZD	31
																		1	AZD	7			1	AZD	45
																		1	AZD	9			1	AZD	56
																		1	AZD	95			1	AZD	13
																		1	AZD	11			1	AZD	70
																		1	AZD	21			1	AZD	50
																		1	AZD	53			1	AZD	13
																		1	AZD	58			1	AZD	12
																		1	AZD	71			1	AZD	47
																		1	AZD	49			1	AZD	15
																		1	AZD	35			1	AZD	19
																		1	AZD	44			1	AZD	14
																		1	AZD	48			1	AZD	19
																		1	AZD	110			1	AZD	25
																		1	AZD	10			1	AZD	48
																		1	AZD	29			1	AZD	26
																		1	AZD	28			1	AZD	21
																		1	AZD	36			1	AZD	13
																		1	AZD	30			1	AZD	25
																		1	AZD	67			1	AZD	28
																		1	AZD	38			1	AZD	44
																		1	AZD	36			1	AZD	10
																		1	AZD	67			1	AZD	41
																		1	AZD	31			1	AZD	15
																		1	AZD	32			1	AZD	12
																		1	AZD	31			1	AZD	14
																		1	AZD	30			1	AZD	12
																		1	AZD	31			1	AZD	9
																		1	AZD	30			1	AZD	12
																		1	AZD	18			1	AZD	69
																		1	AZD	36			1	AZD	9
																		1	AZD	32			1	AZD	18
																		1	AZD	33			1	AZD	20
																		1	AZD	13			1	AZD	34
																		1	AZD	39			1	AZD	78
																		1	AZD	45			1	AZD	17
																		1	AZD	43			1	AZD	24
																		1	AZD	29			1	AZD	58
																		1	AZD	66			1	AZD	16
																		1	AZD	21			1	AZD	279
																		1	AZD	71			1	AZD	20
																		1	AZD	25			1	AZD	80
																		1	AZD	48			1	AZD	36
																		1	AZD	95			1	AZD	50
																		1	AZD	150			1	AZD	5
																		1	AZD	24			1	AZD	56
																		1	AZD	21			1	AZD	162
																		1	AZD	42			1	AZD	14
																		1	AZD	41			1	AZD	19
																		1	AZD	4			1	AZD	41
																		1	AZD	33			1	AZD	54
																		1	AZD	27			1	AZD	37
																		1	AZD	28			1	AZD	46
																		1	AZD	57			1	AZD	27
																		1	AZD	40			1	AZD	17
																		1	AZD	38			1	AZD	38
																		1	AZD	48			1	AZD	10
																		1	AZD	64			1	AZD	62
																		1	AZD	51			1	AZD	40
																		1	AZD	98			1	AZD	19
																		1	AZD	51			1	AZD	25
																		1	AZD	13			1	AZD	61
																		1	AZD	213			1	AZD	19
																		1	AZD	47			1	AZD	17
																		1	AZD	81			1	AZD	21
																		1	AZD	41			1	AZD	21
																		1	AZD	86			1	AZD	13
																		1	AZD	40			1	AZD	21
																		1	AZD	48			1	AZD	127
																		1	AZD	34			1	AZD	22
																		1	AZD	60			1	AZD	34
																		1	AZD	29			1	AZD	20
																		1	AZD	69			1	AZD	28
																		1	AZD	45			1	AZD	29
																		1	AZD	11			1	AZD	73
																		1	AZD	26			1	AZD	40
																		1	AZD	66			1	AZD	11
																		1	AZD	20			1	AZD	57
																		1	AZD	94			1	AZD	12
																		1	AZD	39			1	AZD	38
																		1	AZD	41			1	AZD	23
																		1	AZD	25			1	AZD	157
																		1	AZD	47			1	AZD	67
																		1	AZD	67			1	AZD	20
																		1	AZD	47			1	AZD	29
																		1	AZD	46			1	AZD	52
																		1	AZD	47			1	AZD	17
																		1	AZD	21			1	AZD	65
																		1	AZD	89			1	AZD	21
																		1	AZD	73			1	AZD	4
																		1	AZD	41			1	AZD	17
																		1	AZD	42			1	AZD	11
																		1	AZD	18			1	AZD	34
																		1	AZD	39			1	AZD	21
																		1	AZD	32			1	AZD	16
																		1	AZD	33			1	AZD	19
																		1	AZD	43			1	AZD	82
																		1	AZD	8			1	AZD	129
																		1	AZD	40			1	AZD	27
																		1	AZD	13			1	AZD	43
																		1	AZD	90			1	AZD	32
																		1	AZD	19			1	AZD	37
																		1	AZD	9			1	AZD	39
																		1	AZD	119			1	AZD	37
																		1	AZD	91			1	AZD	27
																		1	AZD	59			1	AZD	28
																		1	AZD	49			1	AZD	29
																		1	AZD	50			1	AZD	45
																		1	AZD	45			1	AZD	26
																		1	AZD	43			1	AZD	25
																		1	AZD	31			1	AZD	49
																		1	AZD	55			1	AZD	60
																		1	AZD	18			1	AZD	149
																		1	AZD	70			1	AZD	56
																		1	AZD	56			1	AZD	4
																		1	AZD	20			1	AZD	94
																		1	AZD	36			1	AZD	15
																		1	AZD	47			1	AZD	33
																		1	AZD	17			1	AZD	97
																		1	AZD	51			1	AZD	11
																		1	AZD	37			1	AZD	79
																		1	AZD	42			1	AZD	22
																		1	AZD	24			1	AZD	18
																		1	AZD	53			1	AZD	31
																		1	AZD	54			1	AZD	27
																		1	AZD	59			1	AZD	33
																		1	AZD	40			1	AZD	84
																		1	AZD	39			1	AZD	23
																		1	AZD	44			1	AZD	11
																		1	AZD	27			1	AZD	49
																		1	AZD	26			1	AZD	23
																		1	AZD	30			1	AZD	22
																		1	AZD	41			1	AZD	6
																		1	AZD	37			1	AZD	40
																		1	AZD	35			1	AZD	24
																		1	AZD	54			1	AZD	72
																		1	AZD	31			1	AZD	17
																		1	AZD	34			1	AZD	27
																		1	AZD	28			1	AZD	35
																		1	AZD	40			1	AZD	19
																		1	AZD	33			1	AZD	48
																		1	AZD	50			1	AZD	11
																		1	AZD	27			1	AZD	66
																		1	AZD	19			1	AZD	94
																		1	AZD	10			1	AZD	41
																		1	AZD	53			1	AZD	18
																		1	AZD	46			1	AZD	22
																		1	AZD	76			1	AZD	17
																		1	AZD	65			1	AZD	20
																		1	AZD	25			1	AZD	23
																		1	AZD	42			1	AZD	48
																		1	AZD	42			1	AZD	41
																		1	AZD	30			1	AZD	12
																		1	AZD	76			1	AZD	25
																		1	AZD	55			1	AZD	21
																		1	AZD	46			1	AZD	35
																		1	AZD	85			1	AZD	87
																		1	AZD	38			1	AZD	60
																		1	AZD	31			1	AZD	15
																		1	AZD	30			1	AZD	47
																		1	AZD	55			1	AZD	16
																		1	AZD	18			1	AZD	36
																		1	AZD	22			1	AZD	23
																		1	AZD	60			1	AZD	58
																		1	AZD	108			1	AZD	29
																		1	AZD	58			1	AZD	26
																		1	AZD	37			1	AZD	66
																		1	AZD	53			1	AZD	30
																		1	AZD	75			1	AZD	33
																		1	AZD	45			1	AZD	31
																		1	AZD	129			1	AZD	24
																		1	AZD	115			1	AZD	44
																		1	AZD	35			1	AZD	50
																		1	AZD	49			1	AZD	26
																		1	AZD	38			1	AZD	85
																		1	AZD	49			1	AZD	18
																		1	AZD	58			1	AZD	8
																		1	AZD	29			1	AZD	58
																		1	AZD	80			1	AZD	32
																		1	AZD	24			1	AZD	27
																		1	AZD	60			1	AZD	40
																		1	AZD	43			1	AZD	22
																		1	AZD	38			1	AZD	19
																		1	AZD	49			1	AZD	36
																		1	AZD	34			1	AZD	19
																		1	AZD	50			1	AZD	31
																		1	AZD	53			1	AZD	24
																		1	AZD	39			1	AZD	44
																		1	AZD	29			1	AZD	18
																		1	AZD	62			1	AZD	29
																		1	AZD	35			1	AZD	10
																		1	AZD	47			1	AZD	34
																		1	AZD	50			1	AZD	28
																		1	AZD	78			1	AZD	16
																		1	AZD	27			1	AZD	54
																		1	AZD	78			1	AZD	30
																		1	AZD	42			1	AZD	9
																		1	AZD	36			1	AZD	26
																		1	AZD	15			1	AZD	38
																		1	AZD	20			1	AZD	21
																		1	AZD	39			1	AZD	27
																		1	AZD	44			1	AZD	33
																		1	AZD	10			1	AZD	69
																		1	AZD	51			1	AZD	17
																		1	AZD	43			1	AZD	35
																		1	AZD	34			1	AZD	11
																		1	AZD	40			1	AZD	15
																		1	AZD	36			1	AZD	54
																		1	AZD	44			1	AZD	36
																		1	AZD	16			1	AZD	106
																		1	AZD	52			1	AZD	25
																		1	AZD	27			1	AZD	41
																		1	AZD	30			1	AZD	13
																		1	AZD	53			1	AZD	22
																		1	AZD	10			1	AZD	34
																		1	AZD	20			1	AZD	60
																		1	AZD	12			1	AZD	51
																		1	AZD	119			1	AZD	39
																		1	AZD	46			1	AZD	22
																		1	AZD	36			1	AZD	17
																		1	AZD	37			1	AZD	11
																		1	AZD	29			1	AZD	111
																		1	AZD	98			1	AZD	19
																		1	AZD	205			1	AZD	91
																		1	AZD	77			1	AZD	22
																		1	AZD	55			1	AZD	26
																		1	AZD	56			1	AZD	48
																		1	AZD	51			1	AZD	74
																		1	AZD	72			1	AZD	28
																		1	AZD	45			1	AZD	23
																		1	AZD	63			1	AZD	29
																		1	AZD	38			1	AZD	16
																		1	AZD	47			1	AZD	17
																		1	AZD	41			1	AZD	19
																		1	AZD	38			1	AZD	23
																		1	AZD	42			1	AZD	28
																		1	AZD	30			1	AZD	28
																		1	AZD	35			1	AZD	20
																		1	AZD	51			1	AZD	11
																		1	AZD	37			1	AZD	13
																		1	AZD	46			1	AZD	56
																		1	AZD	48			1	AZD	27
																		1	AZD	51			1	AZD	21
																		1	AZD	22			1	AZD	26
																		1	AZD	123			1	AZD	30
																		1	AZD	34			1	AZD	8
																		1	AZD	24			1	AZD	58
																		1	AZD	19			1	AZD	43
																		1	AZD	27			1	AZD	16
																		1	AZD	81			1	AZD	25
																		1	AZD	33			1	AZD	37
																		1	AZD	15			1	AZD	24
																		1	AZD	52			1	AZD	14
																		1	AZD	58			1	AZD	43
																		1	AZD	37			1	AZD	42
																		1	AZD	15			1	AZD	40
																		1	AZD	44			1	AZD	84
																		1	AZD	27			1	AZD	14
																		1	AZD	14			1	AZD	38
																		1	AZD	37			1	AZD	9
																		1	AZD	21			1	AZD	22
																		1	AZD	42			1	AZD	21
																		1	AZD	6			1	AZD	68
																		1	AZD	32			1	AZD	88
																		1	AZD	44			1	AZD	34
																		1	AZD	37			1	AZD	35
																		1	AZD	50			1	AZD	21
																		1	AZD	50			1	AZD	26
																		1	AZD	47			1	AZD	6
																		1	AZD	46			1	AZD	21
																		1	AZD	75			1	AZD	17
																		1	AZD	42			1	AZD	15
																		1	AZD	27			1	AZD	18
																		1	AZD	38			1	AZD	54
																		1	AZD	41			1	AZD	24
																		1	AZD	22			1	AZD	58
																		1	AZD	48			1	AZD	28
																		1	AZD	40			1	AZD	25
																		1	AZD	39			1	AZD	13
																		1	AZD	131			1	AZD	37
																		1	AZD	75			1	AZD	18
																		1	AZD	53			1	AZD	26
																		1	AZD	62			1	AZD	48
																		1	AZD	78			1	AZD	39
																		1	AZD	53			1	AZD	50
																		1	AZD	41			1	AZD	34
																		1	AZD	44			1	AZD	64
																		1	AZD	43			1	AZD	22
																		1	AZD	41			1	AZD	26
																		1	AZD	57			1	AZD	28
																		1	AZD	40			1	AZD	20
																		1	AZD	38			1	AZD	15
																		1	AZD	51			1	AZD	29
																		1	AZD	53			1	AZD	15
																		1	AZD	57			1	AZD	36
																		1	AZD	40			1	AZD	19
																		1	AZD	28			1	AZD	34
																		1	AZD	56			1	AZD	27
																		1	AZD	59			1	AZD	8
																		1	AZD	56			1	AZD	55
																		1	AZD	7			1	AZD	101
																		1	AZD	10			1	AZD	130
																		1	AZD	94			1	AZD	11
																		1	AZD	49			1	AZD	34
																		1	AZD	86			1	AZD	35
																		1	AZD	54			1	AZD	17
																		1	AZD	41			1	AZD	25
																		1	AZD	44			1	AZD	80
																		1	AZD	33			1	AZD	53
																		1	AZD	46			1	AZD	8
																		1	AZD	12			1	AZD	74
																		1	AZD	23			1	AZD	97
																		1	AZD	51			1	AZD	50
																		1	AZD	65			1	AZD	23
																		1	AZD	43			1	AZD	37
																		1	AZD	36			1	AZD	133
																		1	AZD	35			1	AZD	34
																		1	AZD	47			1	AZD	51
																		1	AZD	39			1	AZD	22
																		1	AZD	14			1	AZD	68
																		1	AZD	38			1	AZD	15
																		1	AZD	31			1	AZD	18
																		1	AZD	166			1	AZD	17
																		1	AZD	10			1	AZD	75
																		1	AZD	49			1	AZD	25
																		1	AZD	41			1	AZD	15
																		1	AZD	27			1	AZD	24
																		1	AZD	47			1	AZD	11
																		1	AZD	20			1	AZD	56
																		1	AZD	24			1	AZD	43
																		1	AZD	65			1	AZD	129
																		1	AZD	61			1	AZD	38
																		1	AZD	48			1	AZD	50
																		1	AZD	74			1	AZD	50
																		1	AZD	50			1	AZD	33
																		1	AZD	54			1	AZD	84
																		1	AZD	47			1	AZD	28
																		1	AZD	60			1	AZD	63
																		1	AZD	47			1	AZD	17
																		1	AZD	33			1	AZD	20
																		1	AZD	17			1	AZD	35
																		1	AZD	40			1	AZD	34
																		1	AZD	41			1	AZD	16
																		1	AZD	30			1	AZD	27
																		1	AZD	19			1	AZD	25
																		1	AZD	39			1	AZD	13
																		1	AZD	30			1	AZD	32
																		1	AZD	42			1	AZD	49
																		1	AZD	42			1	AZD	41
																		1	AZD	44			1	AZD	42
																		1	AZD	37			1	AZD	33
																		1	AZD	17			1	AZD	87
																		1	AZD	28			1	AZD	26
																		1	AZD	40			1	AZD	30
																		1	AZD	26			1	AZD	33
																		1	AZD	50			1	AZD	48
																		1	AZD	120			1	AZD	49
																		1	AZD	47			1	AZD	43
																		1	AZD	59			1	AZD	30
																		1	AZD	64			1	AZD	27
																		1	AZD	54			1	AZD	30
																		1	AZD	74			1	AZD	42
																		1	AZD	41			1	AZD	41
																		1	AZD	49			1	AZD	34
																		1	AZD	54			1	AZD	29
																		1	AZD	52			1	AZD	30
																		1	AZD	50			1	AZD	27
																		1	AZD	52			1	AZD	25
																		1	AZD	128			1	AZD	31
																		1	AZD	53			1	AZD	20
																		1	AZD	31			1	AZD	39
																		1	AZD	38			1	AZD	32
																		1	AZD	60			1	AZD	66
																		1	AZD	48			1	AZD	18
																		1	AZD	26			1	AZD	62
																		1	AZD	50			1	AZD	41
																		1	AZD	37			1	AZD	48
																		1	AZD	53			1	AZD	29
																		1	AZD	41			1	AZD	18
																		1	AZD	55			1	AZD	39
																		1	AZD	29			1	AZD	29
																		1	AZD	5			1	AZD	76
																		1	AZD	29			1	AZD	229
																		1	AZD	117			1	AZD	26
																		1	AZD	60			1	AZD	45
																		1	AZD	42			1	AZD	42
																		1	AZD	34			1	AZD	60
																		1	AZD	24			1	AZD	64
																		1	AZD	45			1	AZD	26
																		1	AZD	27			1	AZD	60
																		1	AZD	27			1	AZD	115
																		1	AZD	63			1	AZD	26
																		1	AZD	35			1	AZD	31
																		1	AZD	74			1	AZD	15
																		1	AZD	15			1	AZD	154
																		1	AZD	44			1	AZD	21
																		1	AZD	42			1	AZD	21
																		1	AZD	40			1	AZD	76
																		1	AZD	20			1	AZD	81
																		1	AZD	77			1	AZD	17
																		1	AZD	55			1	AZD	7
																		1	AZD	41			1	AZD	21
																		1	AZD	22			1	AZD	30
																		1	AZD	21			1	AZD	37
																		1	AZD	43			1	AZD	14
																		1	AZD	127			1	AZD	11
																		1	AZD	37			1	AZD	21
																		1	AZD	87			1	AZD	22
																		1	AZD	31			1	AZD	25
																		1	AZD	29			1	AZD	20
																		1	AZD	44			1	AZD	7
																		1	AZD	32			1	AZD	20
																		1	AZD	29			1	AZD	21
																		1	AZD	29			1	AZD	37
																		1	AZD	30			1	AZD	21
																		1	AZD	34			1	AZD	33
																		1	AZD	28			1	AZD	21
																		1	AZD	32			1	AZD	43
																		1	AZD	25			1	AZD	23
																		1	AZD	34			1	AZD	15
																		1	AZD	20			1	AZD	43
																		1	AZD	36			1	AZD	21
																		1	AZD	37			1	AZD	9
																		1	AZD	28			1	AZD	14
																		1	AZD	31			1	AZD	13
																		1	AZD	22			1	AZD	42
																		1	AZD	95			1	AZD	38
																		1	AZD	26			1	AZD	22
																		1	AZD	28			1	AZD	8
																		1	AZD	49			1	AZD	5
																		1	AZD	42			1	AZD	31
																		1	AZD	39			1	AZD	16
																		1	AZD	25			1	AZD	68
																		1	AZD	30			1	AZD	19
																		1	AZD	20			1	AZD	20
																		1	AZD	6			1	AZD	59
																		1	AZD	33			1	AZD	18
																		1	AZD	45			1	AZD	42
																		1	AZD	14			1	AZD	45
																		1	AZD	29			1	AZD	23
																		1	AZD	31			1	AZD	58
																		1	AZD	44			1	AZD	25
																		1	AZD	48			1	AZD	49
																		1	AZD	42			1	AZD	22
																		1	AZD	6			1	AZD	38
																		1	AZD	32			1	AZD	13
																		1	AZD	15			1	AZD	37
																		1	AZD	18			1	AZD	35
																		1	AZD	64			1	AZD	27
																		1	AZD	146			1	AZD	48
																		1	AZD	33			1	AZD	173
																		1	AZD	114			1	AZD	9
																		1	AZD	108			1	AZD	4
																		1	AZD	34			1	AZD	69
																		1	AZD	31			1	AZD	98
																		1	AZD	65			1	AZD	21
																		1	AZD	82			1	AZD	4
																		1	AZD	33			1	AZD	50
																		1	AZD	57			1	AZD	28
																		1	AZD	80			1	AZD	20
																		1	AZD	91			1	AZD	24
																		1	AZD	75			1	AZD	51
																		1	AZD	45			1	AZD	47
																		1	AZD	146			1	AZD	67
																		1	AZD	60			1	AZD	24
																		1	AZD	52			1	AZD	46
																		1	AZD	58			1	AZD	14
																		1	AZD	99			1	AZD	17
																		1	AZD	57			1	AZD	16
																		1	AZD	28			1	AZD	98
																		1	AZD	43			1	AZD	21
																		1	AZD	41			1	AZD	26
																		1	AZD	12			1	AZD	68
																		1	AZD	19			1	AZD	44
																		1	AZD	50			1	AZD	34
																		1	AZD	47			1	AZD	5
																		1	AZD	137			1	AZD	21
																		1	AZD	38			1	AZD	82
																		1	AZD	47			1	AZD	16
																		1	AZD	36			1	AZD	38
																		1	AZD	40			1	AZD	21
																		1	AZD	43			1	AZD	91
																		1	AZD	89			1	AZD	91
																		1	AZD	28			1	AZD	45
																		1	AZD	51			1	AZD	46
																		1	AZD	37			1	AZD	49
																		1	AZD	34			1	AZD	24
																		1	AZD	161			1	AZD	29
																		1	AZD	33			1	AZD	21
																		1	AZD	43			1	AZD	39
																		1	AZD	25			1	AZD	20
																		1	AZD	40			1	AZD	6
																		1	AZD	34			1	AZD	19
																		1	AZD	27			1	AZD	58
																		1	AZD	40			1	AZD	43
																		1	AZD	37			1	AZD	27
																		1	AZD	32			1	AZD	57
																		1	AZD	31			1	AZD	21
																		1	AZD	25			1	AZD	26
																		1	AZD	8			1	AZD	47
																		1	AZD	27			1	AZD	23
																		1	AZD	34			1	AZD	25
																		1	AZD	27			1	AZD	43
																		1	AZD	167			1	AZD	24
																		1	AZD	17			1	AZD	44
																		1	AZD	62			1	AZD	52
																		1	AZD	41			1	AZD	22
																		1	AZD	34			1	AZD	8
																		1	AZD	23			1	AZD	23
																		1	AZD	16			1	AZD	67
																		1	AZD	26			1	AZD	76
																		1	AZD	63			1	AZD	26
																		1	AZD	30			1	AZD	18
																		1	AZD	18			1	AZD	23
																		1	AZD	26			1	AZD	23
																		1	AZD	25			1	AZD	21
																		1	AZD	37			1	AZD	21
																		1	AZD	26			1	AZD	19
																		1	AZD	36			1	AZD	25
																		1	AZD	29			1	AZD	18
																		1	AZD	38			1	AZD	27
																		1	AZD	23			1	AZD	10
																		1	AZD	80			1	AZD	16
																		1	AZD	30			1	AZD	16
																		1	AZD	15			1	AZD	170
																		1	AZD	20			1	AZD	20
																		1	AZD	21			1	AZD	23
																		1	AZD	82			1	AZD	16
																		1	AZD	31			1	AZD	10
																		1	AZD	28			1	AZD	14
																		1	AZD	42			1	AZD	10
																		1	AZD	15			1	AZD	27
																		1	AZD	22			1	AZD	45
																		1	AZD	39			1	AZD	20
																		1	AZD	15			1	AZD	24
																		1	AZD	39			1	AZD	29
																		1	AZD	37			1	AZD	10
																		1	AZD	90			1	AZD	3
																		1	AZD	77			1	AZD	42
																		1	AZD	12			1	AZD	33
																		1	AZD	37			1	AZD	19
																		1	AZD	33			1	AZD	57
																		1	AZD	37			1	AZD	36
																		1	AZD	38			1	AZD	25
																		1	AZD	31			1	AZD	23
																		1	AZD	14			1	AZD	115
																		1	AZD	63			1	AZD	5
																		1	AZD	32			1	AZD	42
																		1	AZD	25			1	AZD	21
																		1	AZD	14			1	AZD	33
																		1	AZD	41			1	AZD	15
																		1	AZD	19			1	AZD	32
																		1	AZD	19			1	AZD	70
																		1	AZD	11			1	AZD	37
																		1	AZD	21			1	AZD	53
																		1	AZD	23			1	AZD	28
																		1	AZD	47			1	AZD	9
																		1	AZD	60			1	AZD	18
																		1	AZD	26			1	AZD	23
																		1	AZD	26			1	AZD	31
																		1	AZD	34			1	AZD	19
																		1	AZD	24			1	AZD	25
																		1	AZD	17			1	AZD	37
																		1	AZD	41			1	AZD	72
																		1	AZD	66			1	AZD	9
																		1	AZD	34			1	AZD	11
																		1	AZD	7			1	AZD	36
																		1	AZD	5			1	AZD	43
																		1	AZD	34			1	AZD	14
																		1	AZD	8			1	AZD	44
																		1	AZD	42			1	AZD	16
																		1	AZD	19			1	AZD	97
																		1	AZD	11			1	AZD	41
																		1	AZD	63			1	AZD	181
																		1	AZD	95			1	AZD	110
																		1	AZD	109			1	AZD	10
																		1	AZD	72			1	AZD	18
																		1	AZD	79			1	AZD	32
																		1	AZD	51			1	AZD	49
																		1	AZD	53			1	AZD	48
																		1	AZD	40			1	AZD	26
																		1	AZD	92			1	AZD	108
																		1	AZD	43			1	AZD	34
																		1	AZD	61			1	AZD	29
																		1	AZD	22			1	AZD	28
																		1	AZD	24			1	AZD	102
																		1	AZD	35			1	AZD	18
																		1	AZD	36			1	AZD	19
																		1	AZD	35			1	AZD	18
																		1	AZD	32			1	AZD	19
																		1	AZD	33			1	AZD	20
																		1	AZD	45			1	AZD	36
																		1	AZD	35			1	AZD	18
																		1	AZD	36			1	AZD	68
																		1	AZD	42			1	AZD	84
																		1	AZD	30			1	AZD	20
																		1	AZD	31			1	AZD	16
																		1	AZD	25			1	AZD	22
																		1	AZD	31			1	AZD	17
																		1	AZD	28			1	AZD	40
																		1	AZD	10			1	AZD	71
																		1	AZD	44			1	AZD	50
																		1	AZD	18			1	AZD	16
																		1	AZD	29			1	AZD	16
																		1	AZD	30			1	AZD	72
																		1	AZD	14			1	AZD	96
																		1	AZD	58			1	AZD	16
																		1	AZD	48			1	AZD	70
																		1	AZD	38			1	AZD	16
																		1	AZD	9			1	AZD	85
																		1	AZD	34			1	AZD	18
																		1	AZD	63			1	AZD	10
																		1	AZD	11			1	AZD	46
																		1	AZD	22			1	AZD	44
																		1	AZD	29			1	AZD	25
																		1	AZD	23			1	AZD	29
																		1	AZD	35			1	AZD	18
																		1	AZD	49			1	AZD	15
																		1	AZD	179			1	AZD	14
																		1	AZD	31			1	AZD	45
																		1	AZD	11			1	AZD	36
																		1	AZD	30			1	AZD	15
																		1	SN+AZD	61			1	SN+AZD	26
																		1	SN+AZD	35			1	SN+AZD	47
																		1	SN+AZD	64			1	SN+AZD	7
																		1	SN+AZD	55			1	SN+AZD	18
																		1	SN+AZD	40			1	SN+AZD	20
																		1	SN+AZD	38			1	SN+AZD	18
																		1	SN+AZD	62			1	SN+AZD	15
																		1	SN+AZD	56			1	SN+AZD	68
																		1	SN+AZD	31			1	SN+AZD	21
																		1	SN+AZD	24			1	SN+AZD	26
																		1	SN+AZD	29			1	SN+AZD	20
																		1	SN+AZD	10			1	SN+AZD	73
																		1	SN+AZD	23			1	SN+AZD	26
																		1	SN+AZD	9			1	SN+AZD	39
																		1	SN+AZD	62			1	SN+AZD	48
																		1	SN+AZD	60			1	SN+AZD	31
																		1	SN+AZD	60			1	SN+AZD	62
																		1	SN+AZD	53			1	SN+AZD	18
																		1	SN+AZD	32			1	SN+AZD	25
																		1	SN+AZD	15			1	SN+AZD	31
																		1	SN+AZD	12			1	SN+AZD	76
																		1	SN+AZD	36			1	SN+AZD	8
																		1	SN+AZD	37			1	SN+AZD	7
																		1	SN+AZD	42			1	SN+AZD	18
																		1	SN+AZD	18			1	SN+AZD	24
																		1	SN+AZD	29			1	SN+AZD	11
																		1	SN+AZD	50			1	SN+AZD	46
																		1	SN+AZD	26			1	SN+AZD	18
																		1	SN+AZD	44			1	SN+AZD	30
																		1	SN+AZD	47			1	SN+AZD	88
																		1	SN+AZD	31			1	SN+AZD	53
																		1	SN+AZD	12			1	SN+AZD	40
																		1	SN+AZD	39			1	SN+AZD	18
																		1	SN+AZD	9			1	SN+AZD	46
																		1	SN+AZD	45			1	SN+AZD	17
																		1	SN+AZD	37			1	SN+AZD	15
																		1	SN+AZD	34			1	SN+AZD	26
																		1	SN+AZD	21			1	SN+AZD	39
																		1	SN+AZD	13			1	SN+AZD	63
																		1	SN+AZD	12			1	SN+AZD	30
																		1	SN+AZD	32			1	SN+AZD	19
																		1	SN+AZD	26			1	SN+AZD	42
																		1	SN+AZD	5			1	SN+AZD	47
																		1	SN+AZD	35			1	SN+AZD	12
																		1	SN+AZD	15			1	SN+AZD	82
																		1	SN+AZD	19			1	SN+AZD	41
																		1	SN+AZD	18			1	SN+AZD	38
																		1	SN+AZD	24			1	SN+AZD	25
																		1	SN+AZD	27			1	SN+AZD	21
																		1	SN+AZD	69			1	SN+AZD	12
																		1	SN+AZD	20			1	SN+AZD	24
																		1	SN+AZD	93			1	SN+AZD	18
																		1	SN+AZD	24			1	SN+AZD	48
																		1	SN+AZD	20			1	SN+AZD	55
																		1	SN+AZD	58			1	SN+AZD	16
																		1	SN+AZD	64			1	SN+AZD	9
																		1	SN+AZD	21			1	SN+AZD	43
																		1	SN+AZD	33			1	SN+AZD	33
																		1	SN+AZD	16			1	SN+AZD	47
																		1	SN+AZD	63			1	SN+AZD	13
																		1	SN+AZD	52			1	SN+AZD	83
																		1	SN+AZD	38			1	SN+AZD	17
																		1	SN+AZD	29			1	SN+AZD	29
																		1	SN+AZD	40			1	SN+AZD	49
																		1	SN+AZD	34			1	SN+AZD	26
																		1	SN+AZD	14			1	SN+AZD	41
																		1	SN+AZD	17			1	SN+AZD	32
																		1	SN+AZD	58			1	SN+AZD	17
																		1	SN+AZD	10			1	SN+AZD	62
																		1	SN+AZD	42			1	SN+AZD	4
																		1	SN+AZD	32			1	SN+AZD	14
																		1	SN+AZD	14			1	SN+AZD	32
																		1	SN+AZD	72			1	SN+AZD	16
																		1	SN+AZD	12			1	SN+AZD	28
																		1	SN+AZD	29			1	SN+AZD	15
																		1	SN+AZD	47			1	SN+AZD	59
																		1	SN+AZD	5			1	SN+AZD	38
																		1	SN+AZD	21			1	SN+AZD	50
																		1	SN+AZD	23			1	SN+AZD	43
																		1	SN+AZD	29			1	SN+AZD	13
																		1	SN+AZD	5			1	SN+AZD	26
																		1	SN+AZD	9			1	SN+AZD	47
																		1	SN+AZD	64			1	SN+AZD	6
																		1	SN+AZD	30			1	SN+AZD	21
																		1	SN+AZD	50			1	SN+AZD	8
																		1	SN+AZD	45			1	SN+AZD	7
																		1	SN+AZD	30			1	SN+AZD	17
																		1	SN+AZD	46			1	SN+AZD	13
																		1	SN+AZD	51			1	SN+AZD	9
																		1	SN+AZD	26			1	SN+AZD	22
																		1	SN+AZD	32			1	SN+AZD	14
																		1	SN+AZD	15			1	SN+AZD	40
																		1	SN+AZD	13			1	SN+AZD	34
																		1	SN+AZD	37			1	SN+AZD	21
																		1	SN+AZD	77			1	SN+AZD	10
																		1	SN+AZD	40			1	SN+AZD	32
																		1	SN+AZD	16			1	SN+AZD	33
																		1	SN+AZD	5			1	SN+AZD	42
																		1	SN+AZD	17			1	SN+AZD	75
																		1	SN+AZD	48			1	SN+AZD	11
																		1	SN+AZD	17			1	SN+AZD	62
																		1	SN+AZD	34			1	SN+AZD	25
																		1	SN+AZD	57			1	SN+AZD	31
																		1	SN+AZD	21			1	SN+AZD	33
																		1	SN+AZD	72			1	SN+AZD	22
																		1	SN+AZD	17			1	SN+AZD	41
																		1	SN+AZD	31			1	SN+AZD	103
																		1	SN+AZD	65			1	SN+AZD	20
																		1	SN+AZD	16			1	SN+AZD	56
																		1	SN+AZD	11			1	SN+AZD	78
																		1	SN+AZD	63			1	SN+AZD	32
																		1	SN+AZD	38			1	SN+AZD	11
																		1	SN+AZD	13			1	SN+AZD	51
																		1	SN+AZD	20			1	SN+AZD	66
																		1	SN+AZD	15			1	SN+AZD	69
																		1	SN+AZD	27			1	SN+AZD	15
																		1	SN+AZD	25			1	SN+AZD	21
																		1	SN+AZD	22			1	SN+AZD	27
																		1	SN+AZD	21			1	SN+AZD	24
																		1	SN+AZD	81			1	SN+AZD	10
																		1	SN+AZD	29			1	SN+AZD	17
																		1	SN+AZD	50			1	SN+AZD	43
																		1	SN+AZD	35			1	SN+AZD	24
																		1	SN+AZD	11			1	SN+AZD	49
																		1	SN+AZD	94			1	SN+AZD	10
																		1	SN+AZD	56			1	SN+AZD	21
																		1	SN+AZD	40			1	SN+AZD	29
																		1	SN+AZD	41			1	SN+AZD	67
																		1	SN+AZD	18			1	SN+AZD	79
																		1	SN+AZD	47			1	SN+AZD	23
																		1	SN+AZD	18			1	SN+AZD	24
																		1	SN+AZD	14			1	SN+AZD	28
																		1	SN+AZD	30			1	SN+AZD	20
																		1	SN+AZD	18			1	SN+AZD	30
																		1	SN+AZD	30			1	SN+AZD	23
																		1	SN+AZD	46			1	SN+AZD	5
																		1	SN+AZD	78			1	SN+AZD	46
																		1	SN+AZD	22			1	SN+AZD	46
																		1	SN+AZD	24			1	SN+AZD	29
																		1	SN+AZD	70			1	SN+AZD	9
																		1	SN+AZD	36			1	SN+AZD	86
																		1	SN+AZD	25			1	SN+AZD	44
																		1	SN+AZD	18			1	SN+AZD	41
																		1	SN+AZD	28			1	SN+AZD	23
																		1	SN+AZD	8			1	SN+AZD	43
																		1	SN+AZD	122			1	SN+AZD	5
																		1	SN+AZD	79			1	SN+AZD	51
																		1	SN+AZD	87			1	SN+AZD	21
																		1	SN+AZD	26			1	SN+AZD	54
																		1	SN+AZD	41			1	SN+AZD	37
																		1	SN+AZD	67			1	SN+AZD	10
																		1	SN+AZD	27			1	SN+AZD	45
																		1	SN+AZD	31			1	SN+AZD	29
																		1	SN+AZD	45			1	SN+AZD	14
																		1	SN+AZD	104			1	SN+AZD	15
																		1	SN+AZD	75			1	SN+AZD	19
																		1	SN+AZD	20			1	SN+AZD	77
																		1	SN+AZD	83			1	SN+AZD	37
																		1	SN+AZD	57			1	SN+AZD	18
																		1	SN+AZD	64			1	SN+AZD	17
																		1	SN+AZD	68			1	SN+AZD	37
																		1	SN+AZD	27			1	SN+AZD	48
																		1	SN+AZD	35			1	SN+AZD	67
																		1	SN+AZD	87			1	SN+AZD	43
																		1	SN+AZD	96			1	SN+AZD	78
																		1	SN+AZD	53			1	SN+AZD	49
																		1	SN+AZD	38			1	SN+AZD	53
																		1	SN+AZD	25			1	SN+AZD	77
																		1	SN+AZD	32			1	SN+AZD	56
																		1	SN+AZD	39			1	SN+AZD	103
																		1	SN+AZD	12			1	SN+AZD	68
																		1	SN+AZD	26			1	SN+AZD	71
																		1	SN+AZD	35			1	SN+AZD	75
																		1	SN+AZD	20			1	SN+AZD	116
																		1	SN+AZD	156			1	SN+AZD	11
																		1	SN+AZD	42			1	SN+AZD	35
																		1	SN+AZD	58			1	SN+AZD	23
																		1	SN+AZD	46			1	SN+AZD	29
																		1	SN+AZD	9			1	SN+AZD	115
																		1	SN+AZD	28			1	SN+AZD	45
[truncated: 235 more rows]

## Sheet: rep2
NT	Length_Of_Each_Part_1	Length_Of_Each_Part_2		SN38	Length_Of_Each_Part_1	Length_Of_Each_Part_2		AZD	Length_Of_Each_Part_1	Length_Of_Each_Part_2		SN38+AZD	Length_Of_Each_Part_1	Length_Of_Each_Part_2					replicate	Condition	CldU
	59	51			6	47			20	66			58	57					2	NT	51
	72	20			21	30			14	60			76	8					2	NT	20
	24	58			11	33			15	31			75	10					2	NT	58
	30	47			40	47			22	32			45	30					2	NT	47
	24	45			30	49			22	28			21	45					2	NT	45
	27	41			68	22			17	33			51	29					2	NT	41
	23	45			46	27			32	19			54	19					2	NT	45
	57	11			37	58			15	38			73	43					2	NT	11
	12	53			136	10			20	30			18	40					2	NT	53
	19	43			65	17			11	47			84	13					2	NT	43
	33	55			37	39			21	33			56	72					2	NT	55
	17	37			75	15			15	29			57	16					2	NT	37
	29	26			44	43			9	47			10	52					2	NT	26
	23	40			33	30			17	58			15	47					2	NT	40
	5	38			105	24			18	23			88	87					2	NT	38
	16	28			19	35			62	28			12	73					2	NT	28
	15	34			71	7			19	22			54	15					2	NT	34
	12	46			5	96			29	41			64	17					2	NT	46
	13	35			31	33			11	46			20	40					2	NT	35
	22	26			82	49			27	20			11	71					2	NT	26
	15	34			23	53			52	24			74	30					2	NT	34
	20	42			30	30			20	47			12	64					2	NT	42
	22	23			48	25			29	25			37	20					2	NT	23
	22	49			42	43			24	28			18	28					2	NT	49
	39	22			17	50			16	56			20	24					2	NT	22
	9	36			37	16			26	33			25	19					2	NT	36
	19	47			25	26			18	41			22	32					2	NT	47
	15	67			30	27			20	32			72	31					2	NT	67
	20	49			15	30			32	68			29	41					2	NT	49
	31	71			24	9			68	72			30	40					2	NT	71
	23	41			31	34			47	16			13	66					2	NT	41
	14	48			38	54			13	33			8	51					2	NT	48
	19	37			26	28			74	77			28	25					2	NT	37
	19	36			15	32			15	28			10	70					2	NT	36
	19	63			39	15			24	37			42	49					2	NT	63
	55	38			48	20			40	37			51	70					2	NT	38
	21	31			15	31			43	17			37	62					2	NT	31
	36	53			40	16			67	40			94	20					2	NT	53
	20	29			43	37			9	62			55	43					2	NT	29
	16	32			11	63			11	45			31	46					2	NT	32
	44	27			38	32			82	12			34	38					2	NT	27
	22	46			16	30			10	43			58	56					2	NT	46
	18	38			24	34			70	37			20	40					2	NT	38
	29	40			30	10			15	31			13	64					2	NT	40
	19	34			9	44			20	17			16	39					2	NT	34
	19	34			12	44			14	38			42	40					2	NT	34
	55	10			50	15			13	33			18	36					2	NT	10
	20	28			3	35			15	28			45	6					2	NT	28
	30	65			12	31			46	22			73	15					2	NT	65
	15	112			23	31			11	31			55	18					2	NT	112
	34	74			30	17			20	21			16	33					2	NT	74
	15	60			94	24			14	25			33	49					2	NT	60
	19	49			20	58			40	37			14	35					2	NT	49
	16	53			8	67			19	54			29	37					2	NT	53
	38	72			36	21			15	26			6	49					2	NT	72
	22	39			23	42			30	32			23	32					2	NT	39
	23	38			30	32			23	36			12	38					2	NT	38
	24	37			22	44			76	28			36	25					2	NT	37
	27	47			56	22			65	29			23	19					2	NT	47
	18	36			130	16			25	68			44	68					2	NT	36
	22	34			90	11			76	83			11	70					2	NT	34
	15	43			59	21			20	63			23	49					2	NT	43
	25	33			43	38			28	54			16	23					2	NT	33
	17	36			40	44			36	42			7	54					2	NT	36
	14	39			29	26			20	50			8	42					2	NT	39
	18	34			12	39			16	55			27	48					2	NT	34
	18	34			31	18			25	42			15	31					2	NT	34
	32	34			40	44			11	57			43	18					2	NT	34
	22	29			27	4			47	39			33	28					2	NT	29
	21	29			27	30			23	42			11	43					2	NT	29
	14	35			33	40			18	46			61	27					2	NT	35
	14	35			69	5			47	14			100	15					2	NT	35
	17	44			19	29			9	55			16	30					2	NT	44
	24	39			50	27			9	52			22	25					2	NT	39
	22	58			12	32			18	44			24	47					2	NT	58
	23	42			2	41			12	51			51	70					2	NT	42
	39	60			25	34			41	19			45	57					2	NT	60
	16	37			11	28			15	54			30	55					2	NT	37
	22	41			18	67			16	47			21	53					2	NT	41
	31	48			65	15			21	36			73	9					2	NT	48
	21	87			18	49			15	42			35	48					2	NT	87
	19	48			44	26			5	47			14	38					2	NT	48
	33	38			29	21			13	41			10	42					2	NT	38
	17	49			19	26			73	41			36	25					2	NT	49
	18	49			28	26			44	54			9	38					2	NT	49
	44	74			30	24			15	75			13	38					2	NT	74
	17	48			24	44			32	48			19	25					2	NT	48
	18	45			11	35			57	17			43	84					2	NT	45
	20	42			31	34			48	62			26	42					2	NT	42
	19	42			9	40			26	38			24	37					2	NT	42
	19	39			17	25			19	57			8	40					2	NT	39
	73	17			17	19			22	39			31	32					2	NT	17
	20	39			62	22			27	46			25	52					2	NT	39
	20	39			94	29			15	56			41	13					2	NT	39
	155	40			22	29			24	47			105	12					2	NT	40
	11	41			29	28			10	53			21	27					2	NT	41
	19	35			35	19			17	41			17	38					2	NT	35
	40	14			15	56			17	38			90	5					2	NT	14
	71	64			57	15			47	79			25	24					2	NT	64
	17	36			10	37			14	26			61	42					2	NT	36
	53	35			25	22			33	56			35	84					2	NT	35
	75	26			11	37			68	28			46	59					2	NT	26
	19	29			17	31			22	35			10	68					2	NT	29
	20	58			15	25			15	42			62	15					2	NT	58
	17	31			28	30			22	37			32	41					2	NT	31
	19	31			35	21			66	20			20	58					2	NT	31
	74	12			37	42			75	53			40	39					2	NT	12
	16	24			76	32			29	64			16	37					2	NT	24
	21	29			14	58			20	71			23	36					2	NT	29
	19	27			99	15			7	72			100	24					2	NT	27
	37	40			18	26			24	54			76	5					2	NT	40
	14	34			52	39			46	56			18	36					2	NT	34
	19	27			11	146			19	55			40	44					2	NT	27
	13	30			51	12			18	55			64	14					2	NT	30
	41	61			79	45			21	57			67	45					2	NT	61
	19	41			69	10			14	56			30	45					2	NT	41
	20	35			10	39			29	42			70	16					2	NT	35
	19	20			17	30			17	51			32	71					2	NT	20
	13	27			36	22			25	43			50	10					2	NT	27
	20	47			47	14			23	43			40	16					2	NT	47
	8	44			36	24			18	49			17	37					2	NT	44
	17	41			33	30			20	45			26	20					2	NT	41
	21	39			39	33			25	43			41	25					2	NT	39
	22	37			37	31			40	47			28	41					2	NT	37
	29	18			27	43			31	52			23	20					2	NT	18
	24	41			25	40			14	54			20	24					2	NT	41
	33	34			20	40			63	6			13	31					2	NT	34
	27	45			29	31			17	40			35	19					2	NT	45
	20	34			62	60			56	45			39	25					2	NT	34
	18	28			19	38			21	37			7	85					2	NT	28
	30	37			30	27			16	50			29	57					2	NT	37
	27	62			14	37			13	45			100	3					2	NT	62
	13	30			18	29			55	64			27	59					2	NT	30
	26	49			8	38			18	40			39	34					2	NT	49
	25	45			24	35			22	35			25	14					2	NT	45
	67	46			47	21			20	65			21	27					2	NT	46
	22	69			9	37			12	43			18	27					2	NT	69
	27	29			19	33			19	36			36	19					2	NT	29
	31	45			16	51			14	41			32	18					2	NT	45
	31	38			44	14			11	40			9	33					2	NT	38
	23	36			61	15			7	52			46	27					2	NT	36
	27	34			60	20			49	30			23	70					2	NT	34
	10	66			98	4			67	35			10	32					2	NT	66
	28	24			22	37			23	47			39	13					2	NT	24
	31	27			23	25			13	84			33	17					2	NT	27
	34	23			11	30			32	36			8	45					2	NT	23
	14	68			22	19			21	39			35	21					2	NT	68
	30	26			44	15			50	39			13	32					2	NT	26
	22	51			25	23			41	84			58	16					2	NT	51
	17	43			21	33			31	55			24	43					2	NT	43
	23	34			16	40			20	52			9	69					2	NT	34
	10	44							25	44			18	33					2	NT	44
	25	29							32	43			23	22					2	NT	29
	18	32							18	50			18	29					2	NT	32
	69	21							21	40			31	43					2	NT	21
	17	27							17	45			44	21					2	NT	27
	24	41							14	48			6	65					2	NT	41
	51	14							33	36			59	18					2	NT	14
	10	38							27	75			19	26					2	NT	38
	15	36							32	66			41	13					2	NT	36
	23	72							22	60			41	37					2	NT	72
	31	77							26	47			15	28					2	NT	77
	27	128							21	51			41	23					2	NT	128
	34	87							25	48			33	11					2	NT	87
	30	73							18	48			14	62					2	NT	73
	19	58							20	48			81	9					2	NT	58
	21	58							24	43			47	131					2	NT	58
	27	59							18	45			53	17					2	NT	59
	21	51							32	54			56	41					2	NT	51
	21	50							19	44			7	50					2	NT	50
	30	40							36	25			56	18					2	NT	40
	44	49							22	39			34	35					2	NT	49
	16	52							24	32			76	25					2	NT	52
	14	53							15	42			11	47					2	NT	53
	16	50							9	48			41	31					2	NT	50
	15	52							39	39			30	37					2	NT	52
	14	49							36	35			42	54					2	NT	49
	18	46							29	81			10	55					2	NT	46
	53	45							27	63			14	39					2	NT	45
	23	48							22	49			30	68					2	NT	48
	35	57							41	44			74	51					2	NT	57
	8	54							61	63			96	13					2	NT	54
	13	46							14	43			27	32					2	NT	46
	14	45							32	32			22	35					2	NT	45
	14	43							18	28			47	9					2	NT	43
	19	41							15	44			5	61					2	NT	41
	20	117							44	76			128	9					2	NT	117
	23	44							22	47			12	46					2	NT	44
	19	93							16	51			13	36					2	NT	93
	12	40							33	39			15	35					2	NT	40
	13	38							26	32			18	24					2	NT	38
	10	41							66	71			26	26					2	NT	41
	13	38							54	65			55	17					2	NT	38
	9	44							36	67			41	19					2	NT	44
	31	56							279	46			27	30					2	NT	56
	26	43							41	78			21	38					2	NT	43
	13	40							18	64			25	33					2	NT	40
	17	31							94	48			18	38					2	NT	31
	23	63							29	64			34	26					2	NT	63
	17	37							13	50			15	32					2	NT	37
	72	62							28	34			56	16					2	NT	62
	28	73							25	36			12	29					2	NT	73
	25	55							22	39			18	35					2	NT	55
	72	17							35	19			22	47					2	NT	17
	22	55							20	27			53	19					2	NT	55
	30	44							13	33			4	52					2	NT	44
	23	47							16	29			15	52					2	NT	47
	18	49							56	49			55	18					2	NT	49
	24	44							56	46			41	34					2	NT	44
	16	48							31	82			7	53					2	NT	48
	18	45							119	63			35	85					2	NT	45
	17	45							36	59			9	46					2	NT	45
	49	34							208	5			12	44					2	NT	34
	75	39							17	55			77	27					2	NT	39
	31	83							15	55			24	30					2	NT	83
	18	55							53	133			47	14					2	NT	55
	22	38							40	45			13	32					2	NT	38
	18	55							15	43			44	21					2	NT	55
	20	37							24	72			14	29					2	NT	37
	58	33							15	41			26	18					2	NT	33
	128	56							23	22			9	50					2	NT	56
	38	41							26	64			17	31					2	NT	41
	24	34							22	22			30	23					2	NT	34
	13	112							34	14			38	18					2	NT	112
	24	49							20	29			33	20					2	NT	49
	23	83							118	107			15	64					2	NT	83
	19	41							30	48			38	18					2	NT	41
	57	57							26	51			26	41					2	NT	57
	21	36							20	48			22	36					2	NT	36
	15	33							21	84			34	46					2	NT	33
	26	43							8	54			23	46					2	NT	43
	27	61							31	20			29	27					2	NT	61
	19	52							8	75			24	31					2	NT	52
	72	64							36	20			16	33					2	NT	64
	4	54							18	29			21	51					2	NT	54
	12	42							64	47			52	16					2	NT	42
	19	80							26	53			66	19					2	NT	80
	61	87							39	42			13	32					2	NT	87
	48	69							30	64			19	58					2	NT	69
	30	44							31	52			30	51					2	NT	44
	24	46							23	60			21	36					2	NT	46
	16	61							18	63			26	27					2	NT	61
	21	46							32	47			71	36					2	NT	46
	15	52							23	48			83	17					2	NT	52
	38	95							24	47			3	73					2	NT	95
	24	46							20	51			42	5					2	NT	46
	25	40							21	49			67	11					2	NT	40
	20	43							15	53			49	14					2	NT	43
	22	41							16	50			44	14					2	NT	41
	21	56							19	46			7	77					2	NT	56
	13	46							22	42			36	17					2	NT	46
	12	50							19	122			41	13					2	NT	50
	17	55							16	48			59	16					2	NT	55
	18	24							15	47			32	81					2	NT	24
	12	30							18	51			76	10					2	NT	30
	60	47							29	50			61	13					2	NT	47
	30	52							17	43			11	64					2	NT	52
	25	34							22	35			11	86					2	NT	34
	14	42							27	31			37	54					2	NT	42
	48	21							17	38			14	49					2	NT	21
	62	67							17	39			50	58					2	NT	67
	18	38							61	66			6	47					2	NT	38
	52	55							21	32			55	10					2	NT	55
	22	31							34	58			24	44					2	NT	31
	45	39							77	47			27	34					2	NT	39
	27	23							18	30			41	91					2	NT	23
	24	24							22	81			73	14					2	NT	24
	35	61							19	25			69	7					2	NT	61
	34	105							13	31			12	44					2	NT	105
	23	55							18	26			5	65					2	NT	55
	19	47							17	53			20	27					2	NT	47
	58	58							15	39			28	55					2	NT	58
	47	24							19	28			13	75					2	NT	24
	32	15							75	43			17	35					2	NT	15
	16	38							27	56			29	19					2	NT	38
	16	36							40	67			13	37					2	NT	36
	31	49							34	66			54	18					2	NT	49
	31	65							35	51			23	25					2	NT	65
	10	35							27	67			22	56					2	NT	35
	48	74							17	52			24	22					2	NT	74
	23	38							35	77			37	4					2	NT	38
	28	61							16	53			31	9					2	NT	61
	24	56							30	86			38	7					2	NT	56
	34	19							10	79			54	31					2	NT	19
	36	60							15	43			88	17					2	NT	60
	25	37							16	39			16	92					2	NT	37
	16	40							18	40			60	13					2	NT	40
	127	54							14	40			20	27					2	NT	54
	34	67							19	33			93	14					2	NT	67
	85	63							18	36			57	25					2	NT	63
	24	57							14	39			11	31					2	NT	57
	22	54							12	47			19	23					2	NT	54
	20	52							20	31			62	9					2	NT	52
	48	37							18	28			40	27					2	NT	37
	19	45							15	31			40	17					2	NT	45
	17	41							10	34			44	22					2	NT	41
	17	57							16	27			10	63					2	NT	57
	11	42							18	40			30	40					2	NT	42
	17	29							11	44			6	49					2	NT	29
	40	35							15	29			11	63					2	NT	35
	18	14							21	21			76	28					2	NT	14
	36	53							18	28			11	35					2	NT	53
	26	49							21	45			2	53					2	NT	49
	28	59							11	51			36	21					2	NT	59
	36	65							16	38			14	73					2	NT	65
	69	48							32	42			28	20					2	NT	48
	20	46							26	72			47	42					2	NT	46
	11	49							115	71			64	27					2	NT	49
	47	90							104	27			26	36					2	NT	90
	18	48							56	85			11	74					2	NT	48
	87	36							20	56			8	45					2	NT	36
	24	60							24	52			38	44					2	NT	60
	60	37							22	46			48	31					2	NT	37
	33	57							13	53			21	20					2	NT	57
	13	48							21	55			58	9					2	NT	48
	26	101							17	45			20	56					2	NT	101
	60	50							14	46			13	52					2	NT	50
	43	39							17	41			49	21					2	NT	39
	23	115							28	89			46	11					2	NT	115
	35	41							15	39			15	47					2	NT	41
	23	61							18	38			56	6					2	NT	61
	36	69							22	31			17	41					2	NT	69
	10	42							16	37			46	30					2	NT	42
	19	57							28	92			12	45					2	NT	57
	6	41							12	39			22	36					2	NT	41
	17	38							14	35			20	34					2	NT	38
	22	48							31	46			16	35					2	NT	48
	42	22							12	36			13	48					2	NT	22
	10	53							11	33			47	13					2	NT	53
	38	33							13	34			20	24					2	NT	33
	14	52							13	85			30	17					2	NT	52
	26	62							17	31			24	20					2	NT	62
	24	51							24	41			28	8					2	NT	51
	17	40							18	23			17	27					2	NT	40
	54	94							15	35			35	29					2	NT	94
	46	59							30	57			35	45					2	NT	59
	24	42							14	36			18	13					2	NT	42
	30	35							37	63			5	18					2	NT	35
	60	38							20	42			29	25					2	NT	38
	32	37							24	29			23	26					2	NT	37
	21	57							23	37			37	12					2	NT	57
	38	64							19	36			23	32					2	NT	64
	22	53							19	38			22	24					2	NT	53
	137	48							20	32			29	13					2	NT	48
	27	58							93	34			39	11					2	NT	58
	27	57							13	36			34	20					2	NT	57
	27	52							12	47			22	45					2	NT	52
	35	85							18	31			12	47					2	NT	85
	61	18							8	40			36	18					2	NT	18
	26	48							16	31			8	69					2	NT	48
	21	75							16	31									2	NT	75
	42	50							15	28									2	NT	50
	48	51							14	30									2	NT	51
	28	36							10	30									2	NT	36
	22	43							13	27									2	NT	43
	115	4							10	30									2	NT	4
	24	41							14	30									2	NT	41
	16	69							37	27									2	NT	69
	13	46							37	21									2	NT	46
	24	37							26	78									2	NT	37
	47	9							29	72									2	NT	9
	32	59							15	82									2	NT	59
	71	67							27	60									2	NT	67
	46	16							30	55									2	NT	16
	50	36							21	60									2	NT	36
	23	30							20	59									2	NT	30
	31	23							17	82									2	NT	23
	9	42							27	47									2	NT	42
	22	51							16	58									2	NT	51
	21	25							23	46									2	NT	25
	23	21							12	56									2	NT	21
	21	21							15	50									2	NT	21
	99	52							19	47									2	NT	52
	25	39							29	52									2	NT	39
	90	15							15	50									2	NT	15
	96	21							21	44									2	NT	21
	30	34							16	41									2	NT	34
	17	27							13	56									2	NT	27
	76	39							29	27									2	NT	39
	37	74							18	38									2	NT	74
	62	58							25	52									2	NT	58
	31	46							36	44									2	NT	46
	17	52							19	62									2	NT	52
	21	43							16	43									2	NT	43
	22	46							17	33									2	NT	46
	69	47							17	33									2	NT	47
	22	44							24	21									2	NT	44
	21	49							13	29									2	NT	49
	21	64							11	34									2	NT	64
	16	43							17	37									2	NT	43
	20	42							11	36									2	NT	42
	23	36							25	61									2	NT	36
	22	36							25	55									2	NT	36
	23	32							16	61									2	NT	32
	16	39							22	56									2	NT	39
	17	36							24	53									2	NT	36
	48	14							25	51									2	NT	14
	170	33							27	39									2	NT	33
	16	35							17	46									2	NT	35
	51	48							25	30									2	NT	48
	20	29							14	42									2	NT	29
	24	20							47	59									2	NT	20
	13	29							20	33									2	NT	29
	18	25							15	33									2	NT	25
	32	32							25	22									2	NT	32
	20	20							7	37									2	NT	20
	8	36							18	25									2	NT	36
	15	137							21	52									2	NT	137
	54	43							68	28									2	NT	43
	38	61							20	36									2	NT	61
	37	58							23	32									2	NT	58
	29	58							49	51									2	NT	58
	28	56							8	67									2	NT	56
	32	51							17	58									2	NT	51
	23	51							26	45									2	NT	51
	28	49							20	52									2	NT	49
	23	55							38	50									2	NT	55
	165	31							11	62									2	NT	31
	18	52							17	54									2	NT	52
	29	31							12	67									2	NT	31
	10	60							15	48									2	NT	60
	35	85							13	60									2	NT	85
	25	38							18	46									2	NT	38
	104	31							18	46									2	NT	31
	67	52							39	68									2	NT	52
	18	40							24	54									2	NT	40
	11	46							64	13									2	NT	46
	16	38							23	42									2	NT	38
	25	41							26	53									2	NT	41
	23	45							34	57									2	NT	45
	11	44							19	65									2	NT	44
	16	33							6	76									2	NT	33
	80	46							27	77									2	NT	46
	17	33							25	54									2	NT	33
	12	52							21	53									2	NT	52
	13	35							46	64									2	NT	35
	18	26							44	37									2	NT	26
	12	29							27	30									2	NT	29
	12	31							16	39									2	NT	31
	4	38							27	56									2	NT	38
	34	33							11	41									2	NT	33
	81	60							14	35									2	NT	60
	21	37							15	34									2	NT	37
	56	16							14	37									2	NT	16
	24	37							11	38									2	NT	37
	25	31							13	34									2	NT	31
	12	40							8	38									2	NT	40
	26	25							8	38									2	NT	25
	66	63							11	57									2	NT	63
	91	50							12	35									2	NT	50
	34	69							27	29									2	NT	69
	189	8							17	25									2	NT	8
	73	46							19	24									2	NT	46
	19	64							18	33									2	NT	64
	37	45							30	38									2	NT	45
	93	33							17	41									2	NT	33
	34	43							63	27									2	NT	43
	35	42							67	36									2	NT	42
	18	69							18	27									2	NT	69
	23	71							18	52									2	NT	71
	86	34							20	45									2	NT	34
	12	61																	2	NT	61
	34	60																	2	NT	60
	21	51																	2	NT	51
	29	37																	2	NT	37
	25	40																	2	NT	40
	45	40																	2	NT	40
	19	43																	2	NT	43
	23	38																	2	NT	38
	16	41																	2	NT	41
	19	41																	2	NT	41
	17	39																	2	NT	39
	12	42																	2	NT	42
	20	36																	2	NT	36
	18	52																	2	NT	52
	28	41																	2	NT	41
	24	22																	2	NT	22
	19	41																	2	NT	41
	18	24																	2	NT	24
	16	19																	2	NT	19
	35	43																	2	NT	43
	4	74																	2	NT	74
	37	35																	2	NT	35
	19	40																	2	NT	40
	23	68																	2	NT	68
	48	12																	2	NT	12
	36	62																	2	NT	62
	26	48																	2	NT	48
	29	32																	2	NT	32
	14	96																	2	NT	96
	46	107																	2	NT	107
	89	70																	2	NT	70
	79	81																	2	NT	81
	71	11																	2	NT	11
	23	55																	2	NT	55
	44	33																	2	NT	33
	25	50																	2	NT	50
	25	48																	2	NT	48
	32	67																	2	NT	67
	45	21																	2	NT	21
	31	31																	2	NT	31
	19	41																	2	NT	41
	25	35																	2	NT	35
	19	30																	2	NT	30
	13	46																	2	NT	46
	46	37																	2	NT	37
	22	102																	2	NT	102
	32	26																	2	NT	26
	30	24																	2	NT	24
	40	45																	2	NT	45
	34	20																	2	NT	20
	46	25																	2	NT	25
	10	41																	2	NT	41
	28	23																	2	NT	23
	16	36																	2	NT	36
	25	59																	2	NT	59
	39	22																	2	NT	22
	18	30																	2	NT	30
	37	23																	2	NT	23
	15	29																	2	NT	29
	47	32																	2	NT	32
	26	31																	2	NT	31
	37	34																	2	NT	34
	11	36																	2	NT	36
	36	21																	2	NT	21
	14	34																	2	NT	34
	31	83																	2	NT	83
	14	99																	2	NT	99
	43	92																	2	NT	92
	39	71																	2	NT	71
	40	89																	2	NT	89
	45	48																	2	NT	48
	26	62																	2	NT	62
	146	11																	2	NT	11
	79	44																	2	NT	44
	31	49																	2	NT	49
	31	51																	2	NT	51
	23	51																	2	NT	51
	17	59																	2	NT	59
	18	55																	2	NT	55
	23	47																	2	NT	47
	12	57																	2	NT	57
	75	31																	2	NT	31
	7	60																	2	NT	60
	30	38																	2	NT	38
	20	45																	2	NT	45
	26	39																	2	NT	39
	19	46																	2	NT	46
	21	42																	2	NT	42
	10	41																	2	NT	41
	23	37																	2	NT	37
	18	41																	2	NT	41
	51	39																	2	NT	39
	15	42																	2	NT	42
	90	40																	2	NT	40
	17	36																	2	NT	36
	19	35																	2	NT	35
	31	31																	2	NT	31
	26	27																	2	NT	27
	15	37																	2	NT	37
	27	33																	2	NT	33
	16	31																	2	NT	31
	18	53																	2	NT	53
	18	44																	2	NT	44
	20	38																	2	NT	38
	52	4																	2	NT	4
	44	24																	2	NT	24
	23	66																	2	NT	66
	45	54																	2	NT	54
	13	54																	2	NT	54
	24	49																	2	NT	49
	22	48																	2	NT	48
	9	57																	2	NT	57
	23	40																	2	NT	40
	14	32																	2	NT	32
	22	56																	2	NT	56
	7	38																	2	NT	38
	9	41																	2	NT	41
	7	48																	2	NT	48
	76	13																	2	NT	13
	26	42																	2	NT	42
	25	26																	2	NT	26
	22	27																	2	NT	27
	24	22																	2	NT	22
	16	27																	2	NT	27
	16	25																	2	NT	25
	22	42																	2	NT	42
	19	38																	2	NT	38
	13	39																	2	NT	39
	21	33																	2	NT	33
	29	80																	2	NT	80
	49	45																	2	NT	45
	30	59																	2	NT	59
	79	58																	2	NT	58
	31	50																	2	NT	50
	24	54																	2	NT	54
	19	54																	2	NT	54
	49	41																	2	NT	41
	50	22																	2	NT	22
	28	40																	2	NT	40
	26	41																	2	NT	41
	21	44																	2	NT	44
	16	45																	2	NT	45
	17	43																	2	NT	43
	26	81																	2	NT	81
	37	33																	2	NT	33
	14	35																	2	NT	35
	13	49																	2	NT	49
	6	46																	2	NT	46
	19	34																	2	NT	34
	20	30																	2	NT	30
	67	31																	2	NT	31
	29	30																	2	NT	30
	16	31																	2	NT	31
	25	77																	2	NT	77
	23	21																	2	NT	21
	10	34																	2	NT	34
	23	58																	2	NT	58
	55	26																	2	NT	26
	38	16																	2	NT	16
																			2	SN38	47
																			2	SN38	30
																			2	SN38	33
																			2	SN38	47
																			2	SN38	49
																			2	SN38	22
																			2	SN38	27
																			2	SN38	58
																			2	SN38	10
																			2	SN38	17
																			2	SN38	39
																			2	SN38	15
																			2	SN38	43
																			2	SN38	30
																			2	SN38	24
																			2	SN38	35
																			2	SN38	7
																			2	SN38	96
																			2	SN38	33
																			2	SN38	49
																			2	SN38	53
																			2	SN38	30
																			2	SN38	25
																			2	SN38	43
																			2	SN38	50
																			2	SN38	16
																			2	SN38	26
																			2	SN38	27
																			2	SN38	30
																			2	SN38	9
																			2	SN38	34
																			2	SN38	54
																			2	SN38	28
																			2	SN38	32
																			2	SN38	15
																			2	SN38	20
																			2	SN38	31
																			2	SN38	16
																			2	SN38	37
																			2	SN38	63
																			2	SN38	32
																			2	SN38	30
																			2	SN38	34
																			2	SN38	10
																			2	SN38	44
																			2	SN38	44
																			2	SN38	15
																			2	SN38	35
																			2	SN38	31
																			2	SN38	31
																			2	SN38	17
																			2	SN38	24
																			2	SN38	58
																			2	SN38	67
																			2	SN38	21
																			2	SN38	42
																			2	SN38	32
																			2	SN38	44
																			2	SN38	22
																			2	SN38	16
																			2	SN38	11
																			2	SN38	21
																			2	SN38	38
																			2	SN38	44
																			2	SN38	26
																			2	SN38	39
																			2	SN38	18
																			2	SN38	44
																			2	SN38	4
																			2	SN38	30
																			2	SN38	40
																			2	SN38	5
																			2	SN38	29
																			2	SN38	27
																			2	SN38	32
																			2	SN38	41
																			2	SN38	34
																			2	SN38	28
																			2	SN38	67
																			2	SN38	15
																			2	SN38	49
																			2	SN38	26
																			2	SN38	21
																			2	SN38	26
																			2	SN38	26
																			2	SN38	24
																			2	SN38	44
																			2	SN38	35
																			2	SN38	34
																			2	SN38	40
																			2	SN38	25
																			2	SN38	19
																			2	SN38	22
																			2	SN38	29
																			2	SN38	29
																			2	SN38	28
																			2	SN38	19
																			2	SN38	56
																			2	SN38	15
																			2	SN38	37
																			2	SN38	22
																			2	SN38	37
																			2	SN38	31
																			2	SN38	25
																			2	SN38	30
																			2	SN38	21
																			2	SN38	42
																			2	SN38	32
																			2	SN38	58
																			2	SN38	15
																			2	SN38	26
																			2	SN38	39
																			2	SN38	146
																			2	SN38	12
																			2	SN38	45
																			2	SN38	10
																			2	SN38	39
																			2	SN38	30
																			2	SN38	22
																			2	SN38	14
																			2	SN38	24
																			2	SN38	30
																			2	SN38	33
																			2	SN38	31
																			2	SN38	43
																			2	SN38	40
																			2	SN38	40
																			2	SN38	31
																			2	SN38	60
																			2	SN38	38
																			2	SN38	27
																			2	SN38	37
																			2	SN38	29
																			2	SN38	38
																			2	SN38	35
																			2	SN38	21
																			2	SN38	37
																			2	SN38	33
																			2	SN38	51
																			2	SN38	14
																			2	SN38	15
																			2	SN38	20
																			2	SN38	4
																			2	SN38	37
																			2	SN38	25
																			2	SN38	30
																			2	SN38	19
																			2	SN38	15
																			2	SN38	23
																			2	SN38	33
																			2	SN38	40
																			2	AZD	66
																			2	AZD	60
																			2	AZD	31
																			2	AZD	32
																			2	AZD	28
																			2	AZD	33
																			2	AZD	19
																			2	AZD	38
																			2	AZD	30
																			2	AZD	47
																			2	AZD	33
																			2	AZD	29
																			2	AZD	47
																			2	AZD	58
																			2	AZD	23
																			2	AZD	28
																			2	AZD	22
																			2	AZD	41
																			2	AZD	46
																			2	AZD	20
																			2	AZD	24
																			2	AZD	47
																			2	AZD	25
																			2	AZD	28
																			2	AZD	56
																			2	AZD	33
																			2	AZD	41
																			2	AZD	32
																			2	AZD	68
																			2	AZD	72
																			2	AZD	16
																			2	AZD	33
																			2	AZD	77
																			2	AZD	28
																			2	AZD	37
																			2	AZD	37
																			2	AZD	17
																			2	AZD	40
																			2	AZD	62
																			2	AZD	45
																			2	AZD	12
																			2	AZD	43
																			2	AZD	37
																			2	AZD	31
																			2	AZD	17
																			2	AZD	38
																			2	AZD	33
																			2	AZD	28
																			2	AZD	22
																			2	AZD	31
																			2	AZD	21
																			2	AZD	25
																			2	AZD	37
																			2	AZD	54
																			2	AZD	26
																			2	AZD	32
																			2	AZD	36
																			2	AZD	28
																			2	AZD	29
																			2	AZD	68
																			2	AZD	83
																			2	AZD	63
																			2	AZD	54
																			2	AZD	42
																			2	AZD	50
																			2	AZD	55
																			2	AZD	42
																			2	AZD	57
																			2	AZD	39
																			2	AZD	42
																			2	AZD	46
																			2	AZD	14
																			2	AZD	55
																			2	AZD	52
																			2	AZD	44
																			2	AZD	51
																			2	AZD	19
																			2	AZD	54
																			2	AZD	47
																			2	AZD	36
																			2	AZD	42
																			2	AZD	47
																			2	AZD	41
																			2	AZD	41
																			2	AZD	54
																			2	AZD	75
																			2	AZD	48
																			2	AZD	17
																			2	AZD	62
																			2	AZD	38
																			2	AZD	57
																			2	AZD	39
																			2	AZD	46
																			2	AZD	56
																			2	AZD	47
																			2	AZD	53
																			2	AZD	41
																			2	AZD	38
																			2	AZD	79
																			2	AZD	26
																			2	AZD	56
																			2	AZD	28
																			2	AZD	35
																			2	AZD	42
																			2	AZD	37
																			2	AZD	20
																			2	AZD	53
																			2	AZD	64
																			2	AZD	71
																			2	AZD	72
																			2	AZD	54
																			2	AZD	56
																			2	AZD	55
																			2	AZD	55
																			2	AZD	57
																			2	AZD	56
																			2	AZD	42
																			2	AZD	51
																			2	AZD	43
																			2	AZD	43
																			2	AZD	49
																			2	AZD	45
																			2	AZD	43
																			2	AZD	47
																			2	AZD	52
																			2	AZD	54
																			2	AZD	6
																			2	AZD	40
																			2	AZD	45
																			2	AZD	37
																			2	AZD	50
																			2	AZD	45
																			2	AZD	64
																			2	AZD	40
																			2	AZD	35
																			2	AZD	65
																			2	AZD	43
																			2	AZD	36
																			2	AZD	41
																			2	AZD	40
																			2	AZD	52
																			2	AZD	30
																			2	AZD	35
																			2	AZD	47
																			2	AZD	84
																			2	AZD	36
																			2	AZD	39
																			2	AZD	39
																			2	AZD	84
																			2	AZD	55
																			2	AZD	52
																			2	AZD	44
																			2	AZD	43
																			2	AZD	50
																			2	AZD	40
																			2	AZD	45
																			2	AZD	48
																			2	AZD	36
																			2	AZD	75
																			2	AZD	66
																			2	AZD	60
																			2	AZD	47
																			2	AZD	51
																			2	AZD	48
																			2	AZD	48
																			2	AZD	48
																			2	AZD	43
																			2	AZD	45
																			2	AZD	54
																			2	AZD	44
																			2	AZD	25
																			2	AZD	39
																			2	AZD	32
																			2	AZD	42
																			2	AZD	48
																			2	AZD	39
																			2	AZD	35
																			2	AZD	81
																			2	AZD	63
																			2	AZD	49
																			2	AZD	44
																			2	AZD	63
																			2	AZD	43
																			2	AZD	32
																			2	AZD	28
																			2	AZD	44
																			2	AZD	76
																			2	AZD	47
																			2	AZD	51
																			2	AZD	39
																			2	AZD	32
																			2	AZD	71
																			2	AZD	65
																			2	AZD	67
																			2	AZD	46
																			2	AZD	78
																			2	AZD	64
																			2	AZD	48
																			2	AZD	64
																			2	AZD	50
																			2	AZD	34
																			2	AZD	36
																			2	AZD	39
																			2	AZD	19
																			2	AZD	27
																			2	AZD	33
																			2	AZD	29
																			2	AZD	49
																			2	AZD	46
																			2	AZD	82
																			2	AZD	63
																			2	AZD	59
																			2	AZD	5
																			2	AZD	55
																			2	AZD	55
																			2	AZD	133
																			2	AZD	45
																			2	AZD	43
																			2	AZD	72
																			2	AZD	41
																			2	AZD	22
																			2	AZD	64
																			2	AZD	22
																			2	AZD	14
																			2	AZD	29
																			2	AZD	107
																			2	AZD	48
																			2	AZD	51
																			2	AZD	48
																			2	AZD	84
																			2	AZD	54
																			2	AZD	20
																			2	AZD	75
																			2	AZD	20
																			2	AZD	29
																			2	AZD	47
																			2	AZD	53
																			2	AZD	42
																			2	AZD	64
																			2	AZD	52
																			2	AZD	60
																			2	AZD	63
																			2	AZD	47
																			2	AZD	48
																			2	AZD	47
																			2	AZD	51
																			2	AZD	49
																			2	AZD	53
																			2	AZD	50
																			2	AZD	46
																			2	AZD	42
																			2	AZD	122
																			2	AZD	48
																			2	AZD	47
																			2	AZD	51
																			2	AZD	50
																			2	AZD	43
																			2	AZD	35
																			2	AZD	31
																			2	AZD	38
																			2	AZD	39
																			2	AZD	66
																			2	AZD	32
																			2	AZD	58
																			2	AZD	47
																			2	AZD	30
																			2	AZD	81
																			2	AZD	25
																			2	AZD	31
																			2	AZD	26
																			2	AZD	53
																			2	AZD	39
																			2	AZD	28
																			2	AZD	43
																			2	AZD	56
																			2	AZD	67
																			2	AZD	66
																			2	AZD	51
																			2	AZD	67
																			2	AZD	52
																			2	AZD	77
																			2	AZD	53
																			2	AZD	86
																			2	AZD	79
																			2	AZD	43
																			2	AZD	39
																			2	AZD	40
																			2	AZD	40
																			2	AZD	33
																			2	AZD	36
																			2	AZD	39
																			2	AZD	47
																			2	AZD	31
																			2	AZD	28
																			2	AZD	31
																			2	AZD	34
																			2	AZD	27
																			2	AZD	40
																			2	AZD	44
																			2	AZD	29
																			2	AZD	21
																			2	AZD	28
																			2	AZD	45
																			2	AZD	51
																			2	AZD	38
																			2	AZD	42
																			2	AZD	72
																			2	AZD	71
																			2	AZD	27
																			2	AZD	85
																			2	AZD	56
																			2	AZD	52
																			2	AZD	46
																			2	AZD	53
																			2	AZD	55
																			2	AZD	45
																			2	AZD	46
																			2	AZD	41
																			2	AZD	89
																			2	AZD	39
																			2	AZD	38
																			2	AZD	31
																			2	AZD	37
																			2	AZD	92
																			2	AZD	39
																			2	AZD	35
																			2	AZD	46
																			2	AZD	36
																			2	AZD	33
																			2	AZD	34
																			2	AZD	85
																			2	AZD	31
																			2	AZD	41
																			2	AZD	23
																			2	AZD	35
																			2	AZD	57
																			2	AZD	36
																			2	AZD	63
																			2	AZD	42
																			2	AZD	29
																			2	AZD	37
																			2	AZD	36
																			2	AZD	38
																			2	AZD	32
																			2	AZD	34
																			2	AZD	36
																			2	AZD	47
																			2	AZD	31
																			2	AZD	40
																			2	AZD	31
																			2	AZD	31
																			2	AZD	28
																			2	AZD	30
																			2	AZD	30
																			2	AZD	27
																			2	AZD	30
																			2	AZD	30
																			2	AZD	27
																			2	AZD	21
																			2	AZD	78
																			2	AZD	72
																			2	AZD	82
																			2	AZD	60
																			2	AZD	55
																			2	AZD	60
																			2	AZD	59
																			2	AZD	82
																			2	AZD	47
																			2	AZD	58
																			2	AZD	46
																			2	AZD	56
																			2	AZD	50
																			2	AZD	47
																			2	AZD	52
																			2	AZD	50
																			2	AZD	44
																			2	AZD	41
																			2	AZD	56
																			2	AZD	27
																			2	AZD	38
																			2	AZD	52
																			2	AZD	44
																			2	AZD	62
																			2	AZD	43
																			2	AZD	33
																			2	AZD	33
																			2	AZD	21
																			2	AZD	29
																			2	AZD	34
																			2	AZD	37
																			2	AZD	36
																			2	AZD	61
																			2	AZD	55
																			2	AZD	61
																			2	AZD	56
																			2	AZD	53
																			2	AZD	51
																			2	AZD	39
																			2	AZD	46
																			2	AZD	30
																			2	AZD	42
																			2	AZD	59
																			2	AZD	33
																			2	AZD	33
																			2	AZD	22
																			2	AZD	37
																			2	AZD	25
																			2	AZD	52
																			2	AZD	28
																			2	AZD	36
																			2	AZD	32
																			2	AZD	51
																			2	AZD	67
																			2	AZD	58
																			2	AZD	45
																			2	AZD	52
																			2	AZD	50
																			2	AZD	62
																			2	AZD	54
																			2	AZD	67
																			2	AZD	48
																			2	AZD	60
																			2	AZD	46
																			2	AZD	46
																			2	AZD	68
																			2	AZD	54
																			2	AZD	13
																			2	AZD	42
																			2	AZD	53
																			2	AZD	57
																			2	AZD	65
																			2	AZD	76
																			2	AZD	77
																			2	AZD	54
																			2	AZD	53
																			2	AZD	64
																			2	AZD	37
																			2	AZD	30
																			2	AZD	39
																			2	AZD	56
																			2	AZD	41
																			2	AZD	35
																			2	AZD	34
																			2	AZD	37
																			2	AZD	38
																			2	AZD	34
																			2	AZD	38
																			2	AZD	38
																			2	AZD	57
																			2	AZD	35
																			2	AZD	29
																			2	AZD	25
																			2	AZD	24
																			2	AZD	33
																			2	AZD	38
																			2	AZD	41
																			2	AZD	27
																			2	AZD	36
																			2	AZD	27
																			2	AZD	52
																			2	AZD	45
																			2	SN38+AZD	57
																			2	SN38+AZD	8
																			2	SN38+AZD	10
																			2	SN38+AZD	30
																			2	SN38+AZD	45
																			2	SN38+AZD	29
																			2	SN38+AZD	19
																			2	SN38+AZD	43
																			2	SN38+AZD	40
																			2	SN38+AZD	13
																			2	SN38+AZD	72
																			2	SN38+AZD	16
																			2	SN38+AZD	52
																			2	SN38+AZD	47
																			2	SN38+AZD	87
																			2	SN38+AZD	73
																			2	SN38+AZD	15
																			2	SN38+AZD	17
																			2	SN38+AZD	40
																			2	SN38+AZD	71
																			2	SN38+AZD	30
																			2	SN38+AZD	64
																			2	SN38+AZD	20
																			2	SN38+AZD	28
																			2	SN38+AZD	24
																			2	SN38+AZD	19
																			2	SN38+AZD	32
																			2	SN38+AZD	31
																			2	SN38+AZD	41
																			2	SN38+AZD	40
																			2	SN38+AZD	66
																			2	SN38+AZD	51
																			2	SN38+AZD	25
																			2	SN38+AZD	70
																			2	SN38+AZD	49
																			2	SN38+AZD	70
																			2	SN38+AZD	62
																			2	SN38+AZD	20
																			2	SN38+AZD	43
																			2	SN38+AZD	46
																			2	SN38+AZD	38
																			2	SN38+AZD	56
																			2	SN38+AZD	40
																			2	SN38+AZD	64
																			2	SN38+AZD	39
																			2	SN38+AZD	40
																			2	SN38+AZD	36
																			2	SN38+AZD	6
																			2	SN38+AZD	15
																			2	SN38+AZD	18
																			2	SN38+AZD	33
																			2	SN38+AZD	49
																			2	SN38+AZD	35
																			2	SN38+AZD	37
																			2	SN38+AZD	49
																			2	SN38+AZD	32
																			2	SN38+AZD	38
																			2	SN38+AZD	25
																			2	SN38+AZD	19
																			2	SN38+AZD	68
																			2	SN38+AZD	70
																			2	SN38+AZD	49
																			2	SN38+AZD	23
																			2	SN38+AZD	54
																			2	SN38+AZD	42
																			2	SN38+AZD	48
																			2	SN38+AZD	31
																			2	SN38+AZD	18
																			2	SN38+AZD	28
																			2	SN38+AZD	43
																			2	SN38+AZD	27
																			2	SN38+AZD	15
																			2	SN38+AZD	30
																			2	SN38+AZD	25
																			2	SN38+AZD	47
																			2	SN38+AZD	70
																			2	SN38+AZD	57
																			2	SN38+AZD	55
																			2	SN38+AZD	53
																			2	SN38+AZD	9
																			2	SN38+AZD	48
																			2	SN38+AZD	38
																			2	SN38+AZD	42
																			2	SN38+AZD	25
																			2	SN38+AZD	38
																			2	SN38+AZD	38
																			2	SN38+AZD	25
																			2	SN38+AZD	84
																			2	SN38+AZD	42
																			2	SN38+AZD	37
																			2	SN38+AZD	40
																			2	SN38+AZD	32
																			2	SN38+AZD	52
																			2	SN38+AZD	13
																			2	SN38+AZD	12
																			2	SN38+AZD	27
																			2	SN38+AZD	38
																			2	SN38+AZD	5
																			2	SN38+AZD	24
																			2	SN38+AZD	42
																			2	SN38+AZD	84
																			2	SN38+AZD	59
																			2	SN38+AZD	68
																			2	SN38+AZD	15
																			2	SN38+AZD	41
																			2	SN38+AZD	58
																			2	SN38+AZD	39
																			2	SN38+AZD	37
																			2	SN38+AZD	36
																			2	SN38+AZD	24
																			2	SN38+AZD	5
																			2	SN38+AZD	36
																			2	SN38+AZD	44
																			2	SN38+AZD	14
																			2	SN38+AZD	45
																			2	SN38+AZD	45
																			2	SN38+AZD	16
																			2	SN38+AZD	71
																			2	SN38+AZD	10
																			2	SN38+AZD	16
																			2	SN38+AZD	37
																			2	SN38+AZD	20
																			2	SN38+AZD	25
																			2	SN38+AZD	41
																			2	SN38+AZD	20
																			2	SN38+AZD	24
																			2	SN38+AZD	31
																			2	SN38+AZD	19
																			2	SN38+AZD	25
																			2	SN38+AZD	85
																			2	SN38+AZD	57
																			2	SN38+AZD	3
																			2	SN38+AZD	59
																			2	SN38+AZD	34
																			2	SN38+AZD	14
																			2	SN38+AZD	27
																			2	SN38+AZD	27
																			2	SN38+AZD	19
																			2	SN38+AZD	18
																			2	SN38+AZD	33
																			2	SN38+AZD	27
																			2	SN38+AZD	70
																			2	SN38+AZD	32
																			2	SN38+AZD	13
																			2	SN38+AZD	17
																			2	SN38+AZD	45
																			2	SN38+AZD	21
																			2	SN38+AZD	32
																			2	SN38+AZD	16
																			2	SN38+AZD	43
																			2	SN38+AZD	69
																			2	SN38+AZD	33
																			2	SN38+AZD	22
																			2	SN38+AZD	29
																			2	SN38+AZD	43
																			2	SN38+AZD	21
																			2	SN38+AZD	65
																			2	SN38+AZD	18
																			2	SN38+AZD	26
																			2	SN38+AZD	13
																			2	SN38+AZD	37
																			2	SN38+AZD	28
																			2	SN38+AZD	23
																			2	SN38+AZD	11
																			2	SN38+AZD	62
																			2	SN38+AZD	9
																			2	SN38+AZD	131
																			2	SN38+AZD	17
																			2	SN38+AZD	41
																			2	SN38+AZD	50
																			2	SN38+AZD	18
																			2	SN38+AZD	35
																			2	SN38+AZD	25
																			2	SN38+AZD	47
																			2	SN38+AZD	31
																			2	SN38+AZD	37
																			2	SN38+AZD	54
																			2	SN38+AZD	55
																			2	SN38+AZD	39
																			2	SN38+AZD	68
																			2	SN38+AZD	51
																			2	SN38+AZD	13
																			2	SN38+AZD	32
																			2	SN38+AZD	35
																			2	SN38+AZD	9
																			2	SN38+AZD	61
																			2	SN38+AZD	9
																			2	SN38+AZD	46
																			2	SN38+AZD	36
																			2	SN38+AZD	35
																			2	SN38+AZD	24
																			2	SN38+AZD	26
																			2	SN38+AZD	17
																			2	SN38+AZD	19
																			2	SN38+AZD	30
																			2	SN38+AZD	38
																			2	SN38+AZD	33
																			2	SN38+AZD	38
																			2	SN38+AZD	26
																			2	SN38+AZD	32
																			2	SN38+AZD	16
																			2	SN38+AZD	29
																			2	SN38+AZD	35
																			2	SN38+AZD	47
																			2	SN38+AZD	19
																			2	SN38+AZD	52
																			2	SN38+AZD	52
																			2	SN38+AZD	18
																			2	SN38+AZD	34
																			2	SN38+AZD	53
																			2	SN38+AZD	85
																			2	SN38+AZD	46
																			2	SN38+AZD	44
																			2	SN38+AZD	27
																			2	SN38+AZD	30
																			2	SN38+AZD	14
																			2	SN38+AZD	32
																			2	SN38+AZD	21
																			2	SN38+AZD	29
																			2	SN38+AZD	18
																			2	SN38+AZD	50
																			2	SN38+AZD	31
																			2	SN38+AZD	23
																			2	SN38+AZD	18
																			2	SN38+AZD	20
																			2	SN38+AZD	64
																			2	SN38+AZD	18
																			2	SN38+AZD	41
																			2	SN38+AZD	36
																			2	SN38+AZD	46
																			2	SN38+AZD	46
																			2	SN38+AZD	27
																			2	SN38+AZD	31
																			2	SN38+AZD	33
																			2	SN38+AZD	51
																			2	SN38+AZD	16
																			2	SN38+AZD	19
																			2	SN38+AZD	32
																			2	SN38+AZD	58
																			2	SN38+AZD	51
																			2	SN38+AZD	36
																			2	SN38+AZD	27
																			2	SN38+AZD	36
																			2	SN38+AZD	17
																			2	SN38+AZD	73
																			2	SN38+AZD	5
																			2	SN38+AZD	11
																			2	SN38+AZD	14
																			2	SN38+AZD	14
																			2	SN38+AZD	77
																			2	SN38+AZD	17
																			2	SN38+AZD	13
																			2	SN38+AZD	16
																			2	SN38+AZD	81
																			2	SN38+AZD	10
																			2	SN38+AZD	13
																			2	SN38+AZD	64
																			2	SN38+AZD	86
																			2	SN38+AZD	54
																			2	SN38+AZD	49
																			2	SN38+AZD	58
																			2	SN38+AZD	47
																			2	SN38+AZD	10
																			2	SN38+AZD	44
																			2	SN38+AZD	34
																			2	SN38+AZD	91
																			2	SN38+AZD	14
																			2	SN38+AZD	7
																			2	SN38+AZD	44
																			2	SN38+AZD	65
																			2	SN38+AZD	27
																			2	SN38+AZD	55
																			2	SN38+AZD	75
																			2	SN38+AZD	35
																			2	SN38+AZD	19
																			2	SN38+AZD	37
																			2	SN38+AZD	18
																			2	SN38+AZD	25
																			2	SN38+AZD	56
																			2	SN38+AZD	22
																			2	SN38+AZD	4
																			2	SN38+AZD	9
																			2	SN38+AZD	7
																			2	SN38+AZD	31
																			2	SN38+AZD	17
																			2	SN38+AZD	92
																			2	SN38+AZD	13
																			2	SN38+AZD	27
																			2	SN38+AZD	14
																			2	SN38+AZD	25
																			2	SN38+AZD	31
																			2	SN38+AZD	23
																			2	SN38+AZD	9
																			2	SN38+AZD	27
																			2	SN38+AZD	17
																			2	SN38+AZD	22
																			2	SN38+AZD	63
																			2	SN38+AZD	40
																			2	SN38+AZD	49
																			2	SN38+AZD	63
																			2	SN38+AZD	28
																			2	SN38+AZD	35
																			2	SN38+AZD	53
																			2	SN38+AZD	21
																			2	SN38+AZD	73
																			2	SN38+AZD	20
																			2	SN38+AZD	42
																			2	SN38+AZD	27
																			2	SN38+AZD	36
																			2	SN38+AZD	74
																			2	SN38+AZD	45
																			2	SN38+AZD	44
																			2	SN38+AZD	31
																			2	SN38+AZD	20
																			2	SN38+AZD	9
																			2	SN38+AZD	56
																			2	SN38+AZD	52
																			2	SN38+AZD	21
																			2	SN38+AZD	11
																			2	SN38+AZD	47
																			2	SN38+AZD	6
																			2	SN38+AZD	41
																			2	SN38+AZD	30
																			2	SN38+AZD	45
																			2	SN38+AZD	36
																			2	SN38+AZD	34
																			2	SN38+AZD	35
																			2	SN38+AZD	48
																			2	SN38+AZD	13
																			2	SN38+AZD	24
																			2	SN38+AZD	17
																			2	SN38+AZD	20
																			2	SN38+AZD	8
																			2	SN38+AZD	27
																			2	SN38+AZD	29
																			2	SN38+AZD	45
																			2	SN38+AZD	13
																			2	SN38+AZD	18
																			2	SN38+AZD	25
																			2	SN38+AZD	26
																			2	SN38+AZD	12
																			2	SN38+AZD	32
																			2	SN38+AZD	24
																			2	SN38+AZD	13
																			2	SN38+AZD	11
																			2	SN38+AZD	20
																			2	SN38+AZD	45
																			2	SN38+AZD	47
																			2	SN38+AZD	18
																			2	SN38+AZD	69

## Sheet: rep3
	Length_Of_Each_Part_1	Length_Of_Each_Part_2		SN	Length_Of_Each_Part_1	Length_Of_Each_Part_2		AZD	Length_Of_Each_Part_1	Length_Of_Each_Part_2		AZD+SN	Length_Of_Each_Part_1	Length_Of_Each_Part_2					replicate	Condition	CldU
	101	40			28	39			21	59			44	28					3	NT	40
	54	38			32	33			148	50			10	54					3	NT	38
	30	57			44	87			18	58			32	47					3	NT	57
	38	96			43	33			25	51			40	20					3	NT	96
	22	63			38	15			25	47			34	17					3	NT	63
	28	35			15	36			22	48			23	26					3	NT	35
	15	39			72	11			19	50			59	16					3	NT	39
	64	23			40	48			22	44			16	52					3	NT	23
	14	34			24	33			17	53			18	50					3	NT	34
	49	28			36	29			17	47			30	38					3	NT	28
	23	41			14	29			19	46			54	21					3	NT	41
	16	38			21	56			57	34			12	50					3	NT	38
	19	36			40	14			21	44			32	62					3	NT	36
	17	48			24	32			26	47			65	70					3	NT	48
	23	42			22	27			15	47			22	54					3	NT	42
	14	51			11	41			19	44			55	3					3	NT	51
	38	44			12	42			15	46			46	68					3	NT	44
	23	62			14	21			20	39			21	30					3	NT	62
	17	21			20	36			12	50			12	39					3	NT	21
	15	23			19	42			16	45			23	64					3	NT	23
	16	33			24	26			15	42			30	17					3	NT	33
	15	40			25	30			11	46			62	4					3	NT	40
	26	27			75	50			19	38			27	67					3	NT	27
	29	51			17	37			22	63			4	69					3	NT	51
	35	32			5	47			14	51			5	27					3	NT	32
	69	6			10	40			12	43			12	34					3	NT	6
	78	27			7	37			17	26			55	31					3	NT	27
	21	41			126	9			18	40			23	32					3	NT	41
	27	33			15	39			15	38			23	40					3	NT	33
	13	47			19	33			5	45			12	34					3	NT	47
	21	35			51	85			19	28			21	35					3	NT	35
	17	36			34	33			19	45			43	29					3	NT	36
	13	42			60	41			19	54			18	32					3	NT	42
	25	31			82	17			24	57			13	40					3	NT	31
	24	28			17	61			17	41			20	22					3	NT	28
	20	32			33	20			12	37			57	13					3	NT	32
	19	32			23	46			23	31			32	18					3	NT	32
	18	33			70	38			16	37			23	25					3	NT	33
	24	20			64	22			34	34			39	34					3	NT	20
	23	22			16	43			78	29			14	66					3	NT	22
	17	41			39	24			38	53			12	53					3	NT	41
	24	31			71	24			22	70			18	36					3	NT	31
	37	49			53	40			22	56			18	36					3	NT	49
	19	38			36	27			28	47			38	12					3	NT	38
	17	27			52	17			37	36			43	26					3	NT	27
	19	33			56	6			19	43			13	32					3	NT	33
	19	35			13	41			19	50			19	30					3	NT	35
	19	43			36	16			26	42			17	45					3	NT	43
	22	24			28	14			25	28			21	20					3	NT	24
	49	5			30	15			13	51			32	29					3	NT	5
	10	32			28	52			24	38			14	61					3	NT	32
	30	17			69	46			35	46			26	31					3	NT	17
	30	36			19	39			17	44			33	25					3	NT	36
	22	38			14	41			21	39			12	29					3	NT	38
	17	29			11	40			26	31			29	23					3	NT	29
	28	21			27	21			21	38			5	61					3	NT	21
	24	21			25	41			45	62			26	25					3	NT	21
	54	11			12	79			18	32			14	58					3	NT	11
	37	43			5	50			21	34			73	33					3	NT	43
	20	32			38	32			20	35			15	35					3	NT	32
	28	30			48	43			36	15			12	36					3	NT	30
	6	48			18	29			21	35			22	25					3	NT	48
	9	39			63	17			22	32			9	38					3	NT	39
	17	30			23	21			28	24			14	30					3	NT	30
	7	36			24	21			24	27			11	46					3	NT	36
	5	36			28	15			28	35			22	44					3	NT	36
	17	37			55	14			31	29			33	113					3	NT	37
	14	32			2	55			17	26			20	97					3	NT	32
	31	44			21	41			15	28			27	26					3	NT	44
	20	30			67	12			29	26			8	35					3	NT	30
	91	14			61	8			11	34			23	50					3	NT	14
	40	42			28	18			16	20			29	57					3	NT	42
	63	36			20	43			19	46			15	35					3	NT	36
	27	34			30	16			28	28			34	18					3	NT	34
	18	33			15	30			26	10			9	60					3	NT	33
	26	39			62	2			22	36			45	13					3	NT	39
	15	36			11	45			17	27			23	28					3	NT	36
	16	34			64	20			9	103			16	50					3	NT	34
	18	47			20	47			25	55			18	40					3	NT	47
	26	38			19	28			32	41			11	45					3	NT	38
	15	43			31	31			17	53			23	20					3	NT	43
	22	38			59	11			26	41			22	23					3	NT	38
	18	37			39	20			24	38			30	12					3	NT	37
	12	41			30	18			12	62			73	29					3	NT	41
	11	42			21	37			16	44			45	50					3	NT	42
	14	38			41	13			25	31			38	41					3	NT	38
	21	32			21	23			20	38			86	34					3	NT	32
	13	36			16	26			20	47			41	29					3	NT	36
	13	36			22	34			26	42			51	25					3	NT	36
	15	36			7	35			29	57			59	26					3	NT	36
	14	37			32	53			19	49			23	54					3	NT	37
	52	38			24	13			34	20			32	27					3	NT	38
	31	47			29	53			27	24			26	51					3	NT	47
	16	32			35	43			94	42			34	45					3	NT	32
	16	30			29	20			21	45			25	30					3	NT	30
	17	51			22	39			17	43			17	26					3	NT	51
	15	31			65	13			35	36			22	29					3	NT	31
	17	31			41	16			16	33			67	42					3	NT	31
	43	7			12	28			16	31			33	18					3	NT	7
	27	36			41	11			51	22			28	21					3	NT	36
	21	19			25	4			18	33			7	43					3	NT	19
	14	27			15	6			19	75			8	39					3	NT	27
	30	41			22	37			16	76			35	11					3	NT	41
	19	50			25	23			66	33			12	33					3	NT	50
	11	35			16	33			40	65			9	64					3	NT	35
	26	42			19	56			28	57			9	32					3	NT	42
	15	44			15	37			35	80			9	54					3	NT	44
	9	34			23	24			19	57			7	37					3	NT	34
	42	32			50	15			23	51			24	25					3	NT	32
	23	35			16	25			42	59			11	32					3	NT	35
	18	32			31	21			25	44			13	28					3	NT	32
	13	42			43	18			26	42			16	13					3	NT	42
	22	27			51	20			59	74			9	91					3	NT	27
	20	48			17	34			24	40			4	41					3	NT	48
	9	28			20	25			13	50			5	29					3	NT	28
	12	27			44	13			4	44			18	39					3	NT	27
	44	41			2	48			19	39			29	36					3	NT	41
	23	23			19	30			38	104			24	27					3	NT	23
	62	11			13	71			56	45			13	85					3	NT	11
	18	101			23	45			34	19			23	34					3	NT	101
	18	45			22	18			23	27			46	12					3	NT	45
	16	42			32	27			8	42			4	42					3	NT	42
	13	34			53	31			16	32			26	30					3	NT	34
	21	39			50	39			9	40			88	36					3	NT	39
	17	45			4	54			23	28			7	51					3	NT	45
	17	39			28	29			25	22			7	81					3	NT	39
	13	29			46	38			15	32			16	50					3	NT	29
	17	36			74	11			24	51			28	60					3	NT	36
	7	46			36	26			15	32			4	50					3	NT	46
	13	28			11	48			17	26			12	35					3	NT	28
	16	38			11	40			13	43			22	20					3	NT	38
	16	31			16	41			17	37			7	38					3	NT	31
	28	41			17	26			35	14			10	27					3	NT	41
	15	39			27	29			50	11			40	11					3	NT	39
	19	32			38	42			14	37			6	27					3	NT	32
	16	41			36	45			10	43			9	45					3	NT	41
	10	37			35	58			21	23			21	29					3	NT	37
	15	56			37	55			31	74			12	30					3	NT	56
	31	45			27	17			65	24			27	14					3	NT	45
	24	47			12	37			40	67			15	31					3	NT	47
	4	40			50	16			92	61			27	36					3	NT	40
	15	27			33	16			69	107			3	33					3	NT	27
	18	38			15	29			22	58			19	34					3	NT	38
	15	62			38	24			31	46			18	44					3	NT	62
	20	60			8	21			24	49			44	23					3	NT	60
	17	79			36	13			27	41			8	81					3	NT	79
	17	41			18	38			43	21			43	11					3	NT	41
	51	34			18	42			29	64			7	36					3	NT	34
	25	79			28	34			39	76			20	25					3	NT	79
	16	24			21	47			41	40			12	26					3	NT	24
	18	83			10	21			20	42			13	25					3	NT	83
	21	50			35	5			24	38			33	34					3	NT	50
	32	30			20	31			21	39			41	70					3	NT	30
	54	53			53	12			88	55			17	54					3	NT	53
	37	80			43	34			16	52			26	45					3	NT	80
	17	30			4	33			29	65			15	46					3	NT	30
	10	53			13	36			14	52			32	24					3	NT	53
	35	56			26	11			33	43			25	27					3	NT	56
	30	40			27	43			41	50			14	36					3	NT	40
	14	23			28	37			49	43			11	35					3	NT	23
	21	29			24	43			57	50			12	51					3	NT	29
	28	47			23	27			17	47			5	58					3	NT	47
	16	28			20	22			29	98			11	34					3	NT	28
	33	63			63	7			41	168			34	50					3	NT	63
	38	68			10	52			23	46			29	63					3	NT	68
	38	53			13	34			60	58			32	9					3	NT	53
	28	60			9	47			29	34			31	29					3	NT	60
	26	57			28	32			19	42			54	29					3	NT	57
	49	64			47	13			29	58			7	27					3	NT	64
	27	51			36	51			23	34			22	27					3	NT	51
	56	51			48	29			17	41			34	23					3	NT	51
	21	52			29	25			28	22			20	30					3	NT	52
	23	51			18	34			24	37			24	39					3	NT	51
	38	57			59	26			18	35			13	30					3	NT	57
	22	48			42	14			9	40			16	33					3	NT	48
	68	37			19	32			5	40			31	15					3	NT	37
	18	43			4	50			15	27			24	64					3	NT	43
	75	35			26	20			32	19			46	41					3	NT	35
	29	28			18	34			35	12			51	21					3	NT	28
	24	73			30	20			11	73			17	42					3	NT	73
	123	53			22	52			44	76			17	43					3	NT	53
	55	45			21	38			28	64			32	33					3	NT	45
	27	22			33	19			25	67			35	23					3	NT	22
	22	38			30	24			9	91			93	67					3	NT	38
	28	54			72	19			61	54			54	25					3	NT	54
	23	61			18	33			13	67			22	30					3	NT	61
	40	118			48	12			21	73			19	32					3	NT	118
	12	105			44	69			37	53			31	20					3	NT	105
	22	59			50	19			34	34			15	70					3	NT	59
	27	55			74	11			39	55			33	14					3	NT	55
	25	76			36	28			23	43			35	12					3	NT	76
	28	54			46	15			17	48			18	22					3	NT	54
	26	56			70	13			18	42			70	28					3	NT	56
	27	49			19	21			15	45			24	20					3	NT	49
	20	56			26	22			13	42			44	12					3	NT	56
	22	53			14	91			16	40			48	21					3	NT	53
	33	43			42	44			22	35			19	37					3	NT	43
	41	90			14	57			20	36			22	25					3	NT	90
	25	51			7	20			14	41			74	12					3	NT	51
	19	53			42	25			19	35			52	52					3	NT	53
	24	47			16	39			16	39			32	25					3	NT	47
	21	48			56	39			11	43			28	93					3	NT	48
	22	56			18	21			15	40			14	75					3	NT	56
	70	38			33	30			17	38			57	16					3	NT	38
	15	82			77	25			14	39			24	47					3	NT	82
	32	57			32	9			29	48			14	49					3	NT	57
	55	47			32	48			21	50			53	28					3	NT	47
	13	29			34	31			17	29			20	45					3	NT	29
	23	66			30	19			28	35			16	67					3	NT	66
	16	54			10	32			18	36			64	18					3	NT	54
	27	78			25	28			11	78			44	21					3	NT	78
	28	63			10	80			14	34			22	113					3	NT	63
	237	131			41	14			58	42			18	114					3	NT	131
	41	61			31	32			6	42			33	38					3	NT	61
	36	57			27	25			18	39			27	35					3	NT	57
	70	103			11	37			28	60			13	48					3	NT	103
	19	60			85	31			16	36			24	60					3	NT	60
	34	46			60	13			20	40			36	25					3	NT	46
	70	9			13	47			15	31			35	55					3	NT	9
	22	53			57	18			8	39			7	47					3	NT	53
	21	52			33	21			5	41			27	35					3	NT	52
	23	48			16	35			9	27			20	55					3	NT	48
	54	47			21	28			27	21			35	42					3	NT	47
	19	51			15	48			11	43			9	28					3	NT	51
	53	13			24	31			13	29			21	43					3	NT	13
	28	58			26	36			23	26			45	24					3	NT	58
	25	38			27	56			56	14			11	47					3	NT	38
	37	36			11	33			27	27			16	67					3	NT	36
	20	50			27	44			54	35			39	26					3	NT	50
	16	40			19	20			37	30			4	82					3	NT	40
	16	56			25	40			15	32			33	9					3	NT	56
	27	56			35	15			44	7			10	55					3	NT	56
	17	32			31	29			35	35			28	14					3	NT	32
	19	25			30	76			21	40			14	26					3	NT	25
	30	44			18	31			25	36			5	53					3	NT	44
	43	2							19	40			41	58					3	NT	2
	42	41							12	43			13	54					3	NT	41
	78	30							13	42			41	13					3	NT	30
	22	35							21	40			21	43					3	NT	35
	15	47							39	18			3	42					3	NT	47
	21	39							22	30			20	26					3	NT	39
	18	40							14	36			13	36					3	NT	40
	21	36							12	37			18	29					3	NT	36
	64	10							13	61			41	23					3	NT	10
	5	44							33	29			9	40					3	NT	44
	45	26							21	62			7	44					3	NT	26
	26	42							19	37			6	70					3	NT	42
	23	31							15	28			27	43					3	NT	31
	68	73							12	46			25	37					3	NT	73
	34	87							13	27			26	44					3	NT	87
	26	50							59	16			23	33					3	NT	50
	18	42							24	31			33	37					3	NT	42
	16	41							26	46			28	40					3	NT	41
	86	22							17	43			45	37					3	NT	22
	19	39							54	53			14	44					3	NT	39
	16	34							7	37			43	24					3	NT	34
	10	35							12	83			19	48					3	NT	35
	12	43							55	91			46	66					3	NT	43
	14	31							26	52			22	55					3	NT	31
	25	32							53	46			18	56					3	NT	32
	23	47							35	26			14	71					3	NT	47
	18	32							31	49			45	23					3	NT	32
	19	46							38	61			56	4					3	NT	46
	20	33							8	32			23	64					3	NT	33
	100	38							8	55			34	13					3	NT	38
	11	52							23	55			29	67					3	NT	52
	12	44							52	34			21	31					3	NT	44
	55	22							6	169			52	30					3	NT	22
	68	40							44	89			14	37					3	NT	40
	17	47							42	61			32	18					3	NT	47
	18	45							25	59			49	33					3	NT	45
	18	41							42	72			25	24					3	NT	41
	7	50							27	51			42	22					3	NT	50
	19	50							21	57			24	23					3	NT	50
	12	42							17	55			31	26					3	NT	42
	22	34							26	46			32	41					3	NT	34
	15	36							23	45			55	31					3	NT	36
	17	25							27	57			12	210					3	NT	25
	20	33							16	41			41	14					3	NT	33
	64	34							11	59			57	14					3	NT	34
	3	45							5	37			26	30					3	NT	45
	15	34							11	29			13	35					3	NT	34
	7	39							14	33			18	36					3	NT	39
	15	46							20	26			44	29					3	NT	46
	17	42							14	92			40	33					3	NT	42
	10	30							25	68			12	73					3	NT	30
	11	38							25	53			50	41					3	NT	38
	21	56							25	50			27	38					3	NT	56
	13	36							15	50			27	34					3	NT	36
	22	31							8	57			17	69					3	NT	31
	25	30							15	45			15	35					3	NT	30
	16	40							19	54			13	51					3	NT	40
	25	78							20	37			9	38					3	NT	78
	51	61							20	34			49	18					3	NT	61
	18	59							36	25			10	52					3	NT	59
	21	57							21	48			50	12					3	NT	57
	22	58							16	32			22	142					3	NT	58
	25	48							21	27			29	43					3	NT	48
	25	52							15	32			15	42					3	NT	52
	26	45							17	28			24	51					3	NT	45
	26	47							17	46			43	4					3	NT	47
	100	39							15	29			22	29					3	NT	39
	18	51							44	33			14	34					3	NT	51
	16	51							25	67			29	16					3	NT	51
	26	42							11	36			13	29					3	NT	42
	94	15							10	37			26	25					3	NT	15
	25	83							16	37			10	36					3	NT	83
	33	64							13	36			11	50					3	NT	64
	42	39							15	34			25	21					3	NT	39
	47	23							24	107			6	43					3	NT	23
	14	48							29	70			31	26					3	NT	48
	120	43							12	66			40	17					3	NT	43
	38	51							22	47			42	17					3	NT	51
	19	40							26	50			20	26					3	NT	40
	28	105							30	57			33	15					3	NT	105
	15	41							19	52			43	26					3	NT	41
	26	30							23	47			2	52					3	NT	30
	69	39							16	81			27	45					3	NT	39
	58	43							40	26			11	46					3	NT	43
	23	59							16	52			16	29					3	NT	59
	33	44							22	34			11	33					3	NT	44
	28	47							35	60			35	13					3	NT	47
	28	57							6	59			4	61					3	NT	57
	15	47							48	83			33	16					3	NT	47
	36	68							17	39			17	44					3	NT	68
	33	40							23	68			10	31					3	NT	40
	20	52							23	24			9	47					3	NT	52
	22	50							9	46			10	51					3	NT	50
	22	48							12	50			46	39					3	NT	48
	21	44							39	100			26	37					3	NT	44
	22	44							26	99			110	33					3	NT	44
	17	47							17	37			29	30					3	NT	47
	45	41							21	50			3	46					3	NT	41
	30	31							29	51			7	41					3	NT	31
	14	47							23	58			24	23					3	NT	47
	14	41							15	93			30	36					3	NT	41
	28	46							20	53			13	32					3	NT	46
	29	68							19	51			52	31					3	NT	68
	7	107							13	54			28	27					3	NT	107
	18	68							21	38			52	39					3	NT	68
	16	34							14	53			33	71					3	NT	34
	21	60							20	38			19	46					3	NT	60
	15	31							33	22			13	38					3	NT	31
	20	27							15	39			33	43					3	NT	27
	53	47							10	64			14	53					3	NT	47
	16	37							20	22			85	45					3	NT	37
	20	32							79	2			23	65					3	NT	32
	14	39							26	45			17	41					3	NT	39
	58	35							17	44			36	17					3	NT	35
	61	47							15	51			12	38					3	NT	47
	46	10							114	42			12	36					3	NT	10
	42	77							35	45			64	21					3	NT	77
	31	68							73	31			12	35					3	NT	68
	6	79							10	37			14	30					3	NT	79
	83	34							63	19			8	38					3	NT	34
	113	49							24	92			9	48					3	NT	49
	23	56							31	140			9	36					3	NT	56
	28	47							16	53			13	31					3	NT	47
	24	44							62	42			51	49					3	NT	44
	18	49							14	47			13	59					3	NT	49
	19	50							24	37			26	11					3	NT	50
	21	45							24	31			24	66					3	NT	45
	22	41							18	37			18	15					3	NT	41
	40	38							11	42			19	26					3	NT	38
	56	67							20	58			16	25					3	NT	67
	33	39							7	44			32	10					3	NT	39
	23	64							9	41			25	30					3	NT	64
	16	38							13	35			33	11					3	NT	38
	18	54							7	59			14	75					3	NT	54
	18	46							30	33			18	43					3	NT	46
	25	51							72	35			41	11					3	NT	51
	15	43							81	9			9	27					3	NT	43
	6	83							60	14			40	4					3	NT	83
	24	34							26	35			21	33					3	NT	34
	24	29							14	30			29	19					3	NT	29
	76	61							45	94			21	36					3	NT	61
	22	123							25	77			53	18					3	NT	123
	18	91							25	78			14	56					3	NT	91
	24	72							31	60			19	40					3	NT	72
	25	70							27	57			28	39					3	NT	70
	67	12							24	53			54	13					3	NT	12
	12	152							18	56			25	31					3	NT	152
	18	53							50	75			14	51					3	NT	53
	19	49							18	69			21	25					3	NT	49
	18	46							15	48			18	25					3	NT	46
	18	47							20	43			29	16					3	NT	47
	32	138							18	82			25	17					3	NT	138
	23	57							15	48			9	32					3	NT	57
	19	36							9	52			41	6					3	NT	36
	30	65							17	43			21	32					3	NT	65
	32	59							21	36			16	59					3	NT	59
	37	53							14	41			4	106					3	NT	53
	41	45							21	87			12	55					3	NT	45
	17	49							8	44			42	37					3	NT	49
	10	53							64	26			28	28					3	NT	53
	17	42							46	58			29	21					3	NT	42
	22	31							19	67			26	17					3	NT	31
	20	36							10	41			56	35					3	NT	36
	27	62							11	50			31	10					3	NT	62
	18	67							20	31			24	48					3	NT	67
	41	58							25	32			16	25					3	NT	58
	19	57							18	23			39	35					3	NT	57
	22	52							21	41			11	39					3	NT	52
	22	51							12	32			47	32					3	NT	51
	27	46							19	28			39	13					3	NT	46
	34	60							53	31			19	25					3	NT	60
	33	147							21	39			21	69					3	NT	147
	13	53							24	79			16	49					3	NT	53
	15	50							40	62			28	71					3	NT	50
	27	65							19	148			26	15					3	NT	65
	21	41							20	124			13	36					3	NT	41
	62	69							25	55			27	33					3	NT	69
	14	43							25	50			67	10					3	NT	43
	14	41							17	54			55	11					3	NT	41
	22	35							21	48			18	88					3	NT	35
	15	42							24	31			15	44					3	NT	42
	21	59							19	47			7	83					3	NT	59
	21	32							4	55			20	34					3	NT	32
	43	64							14	45			43	11					3	NT	64
	29	54							4	51			14	25					3	NT	54
	23	53							12	43			16	36					3	NT	53
	52	45							9	93			23	39					3	NT	45
	12	37							11	42			16	34					3	NT	37
	10	25							24	57			51	14					3	NT	25
	12	46							11	35			30	35					3	NT	46
	51	45							20	26			17	26					3	NT	45
	20	21							17	46			44	32					3	NT	21
	21	46							29	23			8	93					3	NT	46
	8	70							15	28			23	24					3	NT	70
	18	45							82	41			10	34					3	NT	45
	23	29							16	48			24	22					3	NT	29
	13	36							17	45			16	34					3	NT	36
	37	20							50	38			18	25					3	NT	20
	31	9							18	55			13	32					3	NT	9
	37	33							20	35			7	36					3	NT	33
	10	41							27	78			11	30					3	NT	41
	34	15							14	54			11	31					3	NT	15
	49	45							25	23			29	43					3	NT	45
	13	38							24	44			27	13					3	NT	38
	23	52							18	40			42	43					3	NT	52
	14	66							23	37			26	14					3	NT	66
	27	74							21	49			10	29					3	NT	74
	35	47							21	35			2	36					3	NT	47
	29	38							19	35			28	54					3	NT	38
	19	45							11	38			20	43					3	NT	45
	54	31							12	49			31	27					3	NT	31
	16	39							33	51			49	8					3	NT	39
	97	39							47	21			30	43					3	NT	39
	7	47							21	25			33	7					3	NT	47
	32	60							19	37			14	35					3	NT	60
	36	50							35	64			40	11					3	NT	50
	29	37							14	80			22	20					3	NT	37
	16	31							27	50			28	13					3	NT	31
	46	43							23	39			6	40					3	NT	43
	7	37							29	42			21	32					3	NT	37
	34	37							16	41			34	16					3	NT	37
	14	30							14	30			22	43					3	NT	30
	23	68							28	46			40	11					3	NT	68
	26	55							66	77			56	71					3	NT	55
	35	36							22	51			40	21					3	NT	36
	34	78							23	47			42	19					3	NT	78
	78	59							51	100			32	78					3	NT	59
	27	54							18	44			26	34					3	NT	54
	45	27							25	53			10	46					3	NT	27
	25	55							41	27			14	43					3	NT	55
	22	56							16	51			32	11					3	NT	56
	39	82							20	44			22	32					3	NT	82
	32	43							22	42			75	35					3	NT	43
	30	41							22	41			4	33					3	NT	41
	31	41							20	42			21	28					3	NT	41
	14	55							16	71			12	27					3	NT	55
	22	40							20	39			22	28					3	NT	40
	20	38							20	38			16	51					3	NT	38
	23	36							18	41			15	16					3	NT	36
	19	38							16	41			16	53					3	NT	38
	28	88							46	10			18	50					3	NT	88
	29	16							22	49			43	6					3	NT	16
	15	33							14	37			40	25					3	NT	33
	36	34							14	36			28	24					3	NT	34
	61	11							13	37			13	33					3	NT	11
	11	48							29	35			18	35					3	NT	48
	35	180							11	45			23	55					3	NT	180
	154	29							43	43			59	17					3	NT	29
	42	108							40	8			46	14					3	NT	108
	41	62							26	64			20	45					3	NT	62
	30	71							30	12			35	14					3	NT	71
	35	57							17	54			40	66					3	NT	57
	29	57							30	16			21	69					3	NT	57
	20	63							26	44			53	41					3	NT	63
	34	44							23	61			45	46					3	NT	44
	31	78							137	59			84	6					3	NT	78
	65	56							21	41			38	37					3	NT	56
	23	52							16	35			6	74					3	NT	52
	19	39							6	39			61	20					3	NT	39
	18	42							16	44			84	33					3	NT	42
	117	14							36	44			14	46					3	NT	14
	26	40							19	36			21	37					3	NT	40
	58	21							3	45			18	58					3	NT	21
	16	36							49	6			49	16					3	NT	36
	24	39							48	21			70	17					3	NT	39
	10	51							23	52			25	55					3	NT	51
	29	48							17	46			6	45					3	NT	48
	19	43							24	31			51	23					3	NT	43
	21	43							19	33			15	78					3	NT	43
	15	45							11	34			9	34					3	NT	45
	32	63							18	46			29	76					3	NT	63
	44	42							21	48			39	15					3	NT	42
	42	66							28	44			57	16					3	NT	66
	22	37							92	42			97	70					3	NT	37
	27	74							19	75			23	71					3	NT	74
	18	36							23	61			58	29					3	NT	36
	15	105							21	50			17	33					3	NT	105
	71	22							14	54			8	42					3	NT	22
	6	43							23	41			12	36					3	NT	43
	8	50							20	45			14	46					3	NT	50
	26	61							20	44			34	25					3	NT	61
	27	16							15	44			38	16					3	NT	16
	17	28							12	50			16	61					3	NT	28
	8	37							16	42			45	35					3	NT	37
	29	71							50	33			32	49					3	NT	71
	8	37							39	36			18	32					3	NT	37
	23	23							39	32			45	10					3	NT	23
	18	39							17	99			41	6					3	NT	39
	26	38							15	55			40	29					3	NT	38
	62	28							16	43									3	NT	28
	62	20							30	65									3	NT	20
	32	38							19	69									3	NT	38
	25	54							17	54									3	NT	54
	9	55							12	39									3	NT	55
	44	27							27	27									3	NT	27
	21	30							12	71									3	NT	30
	40	28							31	55									3	NT	28
	48	26							18	30									3	NT	26
	20	86							14	45									3	NT	86
									19	26									3	SN38	39
									59	15									3	SN38	33
									45	53									3	SN38	87
									27	51									3	SN38	33
									19	57									3	SN38	15
									28	42									3	SN38	36
									17	49									3	SN38	11
									25	19									3	SN38	48
									26	29									3	SN38	33
									14	53									3	SN38	29
									17	38									3	SN38	29
									28	67									3	SN38	56
									43	57									3	SN38	14
									16	38									3	SN38	32
																			3	SN38	27
																			3	SN38	41
																			3	SN38	42
																			3	SN38	21
																			3	SN38	36
																			3	SN38	42
																			3	SN38	26
																			3	SN38	30
																			3	SN38	50
																			3	SN38	37
																			3	SN38	47
																			3	SN38	40
																			3	SN38	37
																			3	SN38	9
																			3	SN38	39
																			3	SN38	33
																			3	SN38	85
																			3	SN38	33
																			3	SN38	41
																			3	SN38	17
																			3	SN38	61
																			3	SN38	20
																			3	SN38	46
																			3	SN38	38
																			3	SN38	22
																			3	SN38	43
																			3	SN38	24
																			3	SN38	24
																			3	SN38	40
																			3	SN38	27
																			3	SN38	17
																			3	SN38	6
																			3	SN38	41
																			3	SN38	16
																			3	SN38	14
																			3	SN38	15
																			3	SN38	52
																			3	SN38	46
																			3	SN38	39
																			3	SN38	41
																			3	SN38	40
																			3	SN38	21
																			3	SN38	41
																			3	SN38	79
																			3	SN38	50
																			3	SN38	32
																			3	SN38	43
																			3	SN38	29
																			3	SN38	17
																			3	SN38	21
																			3	SN38	21
																			3	SN38	15
																			3	SN38	14
																			3	SN38	55
																			3	SN38	41
																			3	SN38	12
																			3	SN38	8
																			3	SN38	18
																			3	SN38	43
																			3	SN38	16
																			3	SN38	30
																			3	SN38	2
																			3	SN38	45
																			3	SN38	20
																			3	SN38	47
																			3	SN38	28
																			3	SN38	31
																			3	SN38	11
																			3	SN38	20
																			3	SN38	18
																			3	SN38	37
																			3	SN38	13
																			3	SN38	23
																			3	SN38	26
																			3	SN38	34
																			3	SN38	35
																			3	SN38	53
																			3	SN38	13
																			3	SN38	53
																			3	SN38	43
																			3	SN38	20
																			3	SN38	39
																			3	SN38	13
																			3	SN38	16
																			3	SN38	28
																			3	SN38	11
																			3	SN38	4
																			3	SN38	6
																			3	SN38	37
																			3	SN38	23
																			3	SN38	33
																			3	SN38	56
																			3	SN38	37
																			3	SN38	24
																			3	SN38	15
																			3	SN38	25
																			3	SN38	21
																			3	SN38	18
																			3	SN38	20
																			3	SN38	34
																			3	SN38	25
																			3	SN38	13
																			3	SN38	48
																			3	SN38	30
																			3	SN38	71
																			3	SN38	45
																			3	SN38	18
																			3	SN38	27
																			3	SN38	31
																			3	SN38	39
																			3	SN38	54
																			3	SN38	29
																			3	SN38	38
																			3	SN38	11
																			3	SN38	26
																			3	SN38	48
																			3	SN38	40
																			3	SN38	41
																			3	SN38	26
																			3	SN38	29
																			3	SN38	42
																			3	SN38	45
																			3	SN38	58
																			3	SN38	55
																			3	SN38	17
																			3	SN38	37
																			3	SN38	16
																			3	SN38	16
																			3	SN38	29
																			3	SN38	24
																			3	SN38	21
																			3	SN38	13
																			3	SN38	38
																			3	SN38	42
																			3	SN38	34
																			3	SN38	47
																			3	SN38	21
																			3	SN38	5
																			3	SN38	31
																			3	SN38	12
																			3	SN38	34
																			3	SN38	33
																			3	SN38	36
																			3	SN38	11
																			3	SN38	43
																			3	SN38	37
																			3	SN38	43
																			3	SN38	27
																			3	SN38	22
																			3	SN38	7
																			3	SN38	52
																			3	SN38	34
																			3	SN38	47
																			3	SN38	32
																			3	SN38	13
																			3	SN38	51
																			3	SN38	29
																			3	SN38	25
																			3	SN38	34
																			3	SN38	26
																			3	SN38	14
																			3	SN38	32
																			3	SN38	50
																			3	SN38	20
																			3	SN38	34
																			3	SN38	20
																			3	SN38	52
																			3	SN38	38
																			3	SN38	19
																			3	SN38	24
																			3	SN38	19
																			3	SN38	33
																			3	SN38	12
																			3	SN38	69
																			3	SN38	19
																			3	SN38	11
																			3	SN38	28
																			3	SN38	15
																			3	SN38	13
																			3	SN38	21
																			3	SN38	22
																			3	SN38	91
																			3	SN38	44
																			3	SN38	57
																			3	SN38	20
																			3	SN38	25
																			3	SN38	39
																			3	SN38	39
																			3	SN38	21
																			3	SN38	30
																			3	SN38	25
																			3	SN38	9
																			3	SN38	48
																			3	SN38	31
																			3	SN38	19
																			3	SN38	32
																			3	SN38	28
																			3	SN38	80
																			3	SN38	14
																			3	SN38	32
																			3	SN38	25
																			3	SN38	37
																			3	SN38	31
																			3	SN38	13
																			3	SN38	47
																			3	SN38	18
																			3	SN38	21
																			3	SN38	35
																			3	SN38	28
																			3	SN38	48
																			3	SN38	31
																			3	SN38	36
																			3	SN38	56
																			3	SN38	33
																			3	SN38	44
																			3	SN38	20
																			3	SN38	40
																			3	SN38	15
																			3	SN38	29
																			3	SN38	76
																			3	SN38	31
																			3	AZD	59
																			3	AZD	50
																			3	AZD	58
																			3	AZD	51
																			3	AZD	47
																			3	AZD	48
																			3	AZD	50
																			3	AZD	44
																			3	AZD	53
																			3	AZD	47
																			3	AZD	46
																			3	AZD	34
																			3	AZD	44
																			3	AZD	47
																			3	AZD	47
																			3	AZD	44
																			3	AZD	46
																			3	AZD	39
																			3	AZD	50
																			3	AZD	45
																			3	AZD	42
																			3	AZD	46
																			3	AZD	38
																			3	AZD	63
																			3	AZD	51
																			3	AZD	43
																			3	AZD	26
																			3	AZD	40
																			3	AZD	38
																			3	AZD	45
																			3	AZD	28
																			3	AZD	45
																			3	AZD	54
																			3	AZD	57
																			3	AZD	41
																			3	AZD	37
																			3	AZD	31
																			3	AZD	37
																			3	AZD	34
																			3	AZD	29
																			3	AZD	53
																			3	AZD	70
																			3	AZD	56
																			3	AZD	47
																			3	AZD	36
																			3	AZD	43
																			3	AZD	50
																			3	AZD	42
																			3	AZD	28
																			3	AZD	51
																			3	AZD	38
																			3	AZD	46
																			3	AZD	44
																			3	AZD	39
																			3	AZD	31
																			3	AZD	38
																			3	AZD	62
																			3	AZD	32
																			3	AZD	34
																			3	AZD	35
																			3	AZD	15
																			3	AZD	35
																			3	AZD	32
																			3	AZD	24
																			3	AZD	27
																			3	AZD	35
																			3	AZD	29
																			3	AZD	26
																			3	AZD	28
																			3	AZD	26
																			3	AZD	34
																			3	AZD	20
																			3	AZD	46
																			3	AZD	28
																			3	AZD	10
																			3	AZD	36
																			3	AZD	27
																			3	AZD	103
																			3	AZD	55
																			3	AZD	41
																			3	AZD	53
																			3	AZD	41
																			3	AZD	38
																			3	AZD	62
																			3	AZD	44
																			3	AZD	31
																			3	AZD	38
																			3	AZD	47
																			3	AZD	42
																			3	AZD	57
																			3	AZD	49
																			3	AZD	20
																			3	AZD	24
																			3	AZD	42
																			3	AZD	45
																			3	AZD	43
																			3	AZD	36
																			3	AZD	33
																			3	AZD	31
																			3	AZD	22
																			3	AZD	33
																			3	AZD	75
																			3	AZD	76
																			3	AZD	33
																			3	AZD	65
																			3	AZD	57
																			3	AZD	80
																			3	AZD	57
																			3	AZD	51
																			3	AZD	59
																			3	AZD	44
																			3	AZD	42
																			3	AZD	74
																			3	AZD	40
																			3	AZD	50
																			3	AZD	44
																			3	AZD	39
																			3	AZD	104
																			3	AZD	45
																			3	AZD	19
																			3	AZD	27
																			3	AZD	42
																			3	AZD	32
																			3	AZD	40
																			3	AZD	28
																			3	AZD	22
																			3	AZD	32
																			3	AZD	51
																			3	AZD	32
																			3	AZD	26
																			3	AZD	43
																			3	AZD	37
																			3	AZD	14
																			3	AZD	11
																			3	AZD	37
																			3	AZD	43
																			3	AZD	23
																			3	AZD	74
																			3	AZD	24
																			3	AZD	67
																			3	AZD	61
																			3	AZD	107
																			3	AZD	58
																			3	AZD	46
																			3	AZD	49
																			3	AZD	41
																			3	AZD	21
																			3	AZD	64
																			3	AZD	76
																			3	AZD	40
																			3	AZD	42
																			3	AZD	38
																			3	AZD	39
																			3	AZD	55
																			3	AZD	52
																			3	AZD	65
																			3	AZD	52
																			3	AZD	43
																			3	AZD	50
																			3	AZD	43
																			3	AZD	50
																			3	AZD	47
																			3	AZD	98
																			3	AZD	168
																			3	AZD	46
																			3	AZD	58
																			3	AZD	34
																			3	AZD	42
																			3	AZD	58
																			3	AZD	34
																			3	AZD	41
																			3	AZD	22
																			3	AZD	37
																			3	AZD	35
																			3	AZD	40
																			3	AZD	40
																			3	AZD	27
																			3	AZD	19
																			3	AZD	12
																			3	AZD	73
																			3	AZD	76
																			3	AZD	64
																			3	AZD	67
																			3	AZD	91
																			3	AZD	54
																			3	AZD	67
																			3	AZD	73
																			3	AZD	53
																			3	AZD	34
																			3	AZD	55
																			3	AZD	43
																			3	AZD	48
																			3	AZD	42
																			3	AZD	45
																			3	AZD	42
																			3	AZD	40
																			3	AZD	35
																			3	AZD	36
																			3	AZD	41
																			3	AZD	35
																			3	AZD	39
																			3	AZD	43
																			3	AZD	40
																			3	AZD	38
																			3	AZD	39
																			3	AZD	48
																			3	AZD	50
																			3	AZD	29
																			3	AZD	35
																			3	AZD	36
																			3	AZD	78
																			3	AZD	34
																			3	AZD	42
																			3	AZD	42
																			3	AZD	39
																			3	AZD	60
																			3	AZD	36
																			3	AZD	40
																			3	AZD	31
																			3	AZD	39
																			3	AZD	41
																			3	AZD	27
																			3	AZD	21
																			3	AZD	43
																			3	AZD	29
																			3	AZD	26
																			3	AZD	14
																			3	AZD	27
																			3	AZD	35
																			3	AZD	30
																			3	AZD	32
																			3	AZD	7
																			3	AZD	35
																			3	AZD	40
																			3	AZD	36
																			3	AZD	40
																			3	AZD	43
																			3	AZD	42
																			3	AZD	40
																			3	AZD	18
																			3	AZD	30
																			3	AZD	36
																			3	AZD	37
																			3	AZD	61
																			3	AZD	29
																			3	AZD	62
																			3	AZD	37
																			3	AZD	28
																			3	AZD	46
																			3	AZD	27
																			3	AZD	16
																			3	AZD	31
																			3	AZD	46
																			3	AZD	43
																			3	AZD	53
																			3	AZD	37
																			3	AZD	83
																			3	AZD	91
																			3	AZD	52
																			3	AZD	46
																			3	AZD	26
																			3	AZD	49
																			3	AZD	61
																			3	AZD	32
																			3	AZD	55
																			3	AZD	55
																			3	AZD	34
																			3	AZD	169
																			3	AZD	89
																			3	AZD	61
																			3	AZD	59
																			3	AZD	72
																			3	AZD	51
																			3	AZD	57
																			3	AZD	55
																			3	AZD	46
																			3	AZD	45
																			3	AZD	57
																			3	AZD	41
																			3	AZD	59
																			3	AZD	37
																			3	AZD	29
																			3	AZD	33
																			3	AZD	26
																			3	AZD	92
																			3	AZD	68
																			3	AZD	53
																			3	AZD	50
																			3	AZD	50
																			3	AZD	57
																			3	AZD	45
																			3	AZD	54
																			3	AZD	37
																			3	AZD	34
																			3	AZD	25
																			3	AZD	48
																			3	AZD	32
																			3	AZD	27
																			3	AZD	32
																			3	AZD	28
																			3	AZD	46
																			3	AZD	29
																			3	AZD	33
																			3	AZD	67
																			3	AZD	36
																			3	AZD	37
																			3	AZD	37
																			3	AZD	36
																			3	AZD	34
																			3	AZD	107
																			3	AZD	70
																			3	AZD	66
																			3	AZD	47
																			3	AZD	50
																			3	AZD	57
																			3	AZD	52
																			3	AZD	47
																			3	AZD	81
																			3	AZD	26
																			3	AZD	52
																			3	AZD	34
																			3	AZD	60
																			3	AZD	59
																			3	AZD	83
																			3	AZD	39
																			3	AZD	68
																			3	AZD	24
																			3	AZD	46
																			3	AZD	50
																			3	AZD	100
																			3	AZD	99
																			3	AZD	37
																			3	AZD	50
																			3	AZD	51
																			3	AZD	58
																			3	AZD	93
																			3	AZD	53
																			3	AZD	51
																			3	AZD	54
																			3	AZD	38
																			3	AZD	53
																			3	AZD	38
																			3	AZD	22
																			3	AZD	39
																			3	AZD	64
																			3	AZD	22
																			3	AZD	2
																			3	AZD	45
																			3	AZD	44
																			3	AZD	51
																			3	AZD	42
																			3	AZD	45
																			3	AZD	31
																			3	AZD	37
																			3	AZD	19
																			3	AZD	92
																			3	AZD	140
																			3	AZD	53
																			3	AZD	42
																			3	AZD	47
																			3	AZD	37
																			3	AZD	31
																			3	AZD	37
																			3	AZD	42
																			3	AZD	58
																			3	AZD	44
																			3	AZD	41
																			3	AZD	35
																			3	AZD	59
																			3	AZD	33
																			3	AZD	35
																			3	AZD	9
																			3	AZD	14
																			3	AZD	35
																			3	AZD	30
																			3	AZD	94
																			3	AZD	77
																			3	AZD	78
																			3	AZD	60
																			3	AZD	57
																			3	AZD	53
																			3	AZD	56
																			3	AZD	75
																			3	AZD	69
																			3	AZD	48
																			3	AZD	43
																			3	AZD	82
																			3	AZD	48
																			3	AZD	52
																			3	AZD	43
																			3	AZD	36
																			3	AZD	41
																			3	AZD	87
																			3	AZD	44
																			3	AZD	26
																			3	AZD	58
																			3	AZD	67
																			3	AZD	41
																			3	AZD	50
																			3	AZD	31
																			3	AZD	32
																			3	AZD	23
																			3	AZD	41
																			3	AZD	32
																			3	AZD	28
																			3	AZD	31
																			3	AZD	39
																			3	AZD	79
																			3	AZD	62
																			3	AZD	148
																			3	AZD	124
																			3	AZD	55
																			3	AZD	50
																			3	AZD	54
																			3	AZD	48
																			3	AZD	31
																			3	AZD	47
																			3	AZD	55
																			3	AZD	45
																			3	AZD	51
																			3	AZD	43
																			3	AZD	93
																			3	AZD	42
																			3	AZD	57
																			3	AZD	35
																			3	AZD	26
																			3	AZD	46
																			3	AZD	23
																			3	AZD	28
																			3	AZD	41
																			3	AZD	48
																			3	AZD	45
																			3	AZD	38
																			3	AZD	55
																			3	AZD	35
																			3	AZD	78
																			3	AZD	54
																			3	AZD	23
																			3	AZD	44
																			3	AZD	40
																			3	AZD	37
																			3	AZD	49
																			3	AZD	35
																			3	AZD	35
																			3	AZD	38
																			3	AZD	49
																			3	AZD	51
																			3	AZD	21
																			3	AZD	25
																			3	AZD	37
																			3	AZD	64
																			3	AZD	80
																			3	AZD	50
																			3	AZD	39
																			3	AZD	42
																			3	AZD	41
																			3	AZD	30
																			3	AZD	46
																			3	AZD	77
																			3	AZD	51
																			3	AZD	47
																			3	AZD	100
																			3	AZD	44
																			3	AZD	53
																			3	AZD	27
																			3	AZD	51
																			3	AZD	44
																			3	AZD	42
																			3	AZD	41
																			3	AZD	42
																			3	AZD	71
																			3	AZD	39
																			3	AZD	38
																			3	AZD	41
																			3	AZD	41
																			3	AZD	10
																			3	AZD	49
																			3	AZD	37
																			3	AZD	36
																			3	AZD	37
																			3	AZD	35
																			3	AZD	45
																			3	AZD	43
																			3	AZD	8
																			3	AZD	64
																			3	AZD	12
																			3	AZD	54
																			3	AZD	16
																			3	AZD	44
																			3	AZD	61
																			3	AZD	59
																			3	AZD	41
																			3	AZD	35
																			3	AZD	39
																			3	AZD	44
																			3	AZD	44
																			3	AZD	36
																			3	AZD	45
																			3	AZD	6
																			3	AZD	21
																			3	AZD	52
																			3	AZD	46
																			3	AZD	31
																			3	AZD	33
																			3	AZD	34
																			3	AZD	46
																			3	AZD	48
																			3	AZD	44
																			3	AZD	42
																			3	AZD	75
																			3	AZD	61
																			3	AZD	50
																			3	AZD	54
																			3	AZD	41
																			3	AZD	45
																			3	AZD	44
																			3	AZD	44
																			3	AZD	50
																			3	AZD	42
																			3	AZD	33
																			3	AZD	36
																			3	AZD	32
																			3	AZD	99
																			3	AZD	55
																			3	AZD	43
																			3	AZD	65
																			3	AZD	69
																			3	AZD	54
																			3	AZD	39
																			3	AZD	27
																			3	AZD	71
																			3	AZD	55
																			3	AZD	30
																			3	AZD	45
																			3	AZD	26
																			3	AZD	15
																			3	AZD	53
																			3	AZD	51
																			3	AZD	57
																			3	AZD	42
																			3	AZD	49
																			3	AZD	19
																			3	AZD	29
																			3	AZD	53
																			3	AZD	38
																			3	AZD	67
																			3	AZD	57
																			3	AZD	38
																			3	SN38+AZD	28
																			3	SN38+AZD	54
																			3	SN38+AZD	47
																			3	SN38+AZD	20
																			3	SN38+AZD	17
																			3	SN38+AZD	26
																			3	SN38+AZD	16
																			3	SN38+AZD	52
																			3	SN38+AZD	50
																			3	SN38+AZD	38
																			3	SN38+AZD	21
																			3	SN38+AZD	50
																			3	SN38+AZD	62
																			3	SN38+AZD	70
																			3	SN38+AZD	54
																			3	SN38+AZD	3
																			3	SN38+AZD	68
																			3	SN38+AZD	30
																			3	SN38+AZD	39
																			3	SN38+AZD	64
																			3	SN38+AZD	17
																			3	SN38+AZD	4
																			3	SN38+AZD	67
																			3	SN38+AZD	69
																			3	SN38+AZD	27
																			3	SN38+AZD	34
																			3	SN38+AZD	31
																			3	SN38+AZD	32
																			3	SN38+AZD	40
																			3	SN38+AZD	34
																			3	SN38+AZD	35
																			3	SN38+AZD	29
																			3	SN38+AZD	32
																			3	SN38+AZD	40
																			3	SN38+AZD	22
																			3	SN38+AZD	13
																			3	SN38+AZD	18
																			3	SN38+AZD	25
																			3	SN38+AZD	34
																			3	SN38+AZD	66
																			3	SN38+AZD	53
																			3	SN38+AZD	36
																			3	SN38+AZD	36
																			3	SN38+AZD	12
																			3	SN38+AZD	26
																			3	SN38+AZD	32
																			3	SN38+AZD	30
																			3	SN38+AZD	45
																			3	SN38+AZD	20
																			3	SN38+AZD	29
																			3	SN38+AZD	61
																			3	SN38+AZD	31
																			3	SN38+AZD	25
																			3	SN38+AZD	29
																			3	SN38+AZD	23
																			3	SN38+AZD	61
																			3	SN38+AZD	25
																			3	SN38+AZD	58
																			3	SN38+AZD	33
																			3	SN38+AZD	35
																			3	SN38+AZD	36
																			3	SN38+AZD	25
																			3	SN38+AZD	38
																			3	SN38+AZD	30
																			3	SN38+AZD	46
																			3	SN38+AZD	44
																			3	SN38+AZD	113
																			3	SN38+AZD	97
																			3	SN38+AZD	26
																			3	SN38+AZD	35
																			3	SN38+AZD	50
																			3	SN38+AZD	57
																			3	SN38+AZD	35
																			3	SN38+AZD	18
																			3	SN38+AZD	60
																			3	SN38+AZD	13
																			3	SN38+AZD	28
																			3	SN38+AZD	50
																			3	SN38+AZD	40
																			3	SN38+AZD	45
																			3	SN38+AZD	20
																			3	SN38+AZD	23
																			3	SN38+AZD	12
																			3	SN38+AZD	29
																			3	SN38+AZD	50
																			3	SN38+AZD	41
																			3	SN38+AZD	34
																			3	SN38+AZD	29
																			3	SN38+AZD	25
																			3	SN38+AZD	26
																			3	SN38+AZD	54
																			3	SN38+AZD	27
																			3	SN38+AZD	51
																			3	SN38+AZD	45
																			3	SN38+AZD	30
																			3	SN38+AZD	26
																			3	SN38+AZD	29
																			3	SN38+AZD	42
																			3	SN38+AZD	18
																			3	SN38+AZD	21
																			3	SN38+AZD	43
																			3	SN38+AZD	39
																			3	SN38+AZD	11
																			3	SN38+AZD	33
																			3	SN38+AZD	64
																			3	SN38+AZD	32
																			3	SN38+AZD	54
																			3	SN38+AZD	37
																			3	SN38+AZD	25
																			3	SN38+AZD	32
																			3	SN38+AZD	28
																			3	SN38+AZD	13
																			3	SN38+AZD	91
																			3	SN38+AZD	41
																			3	SN38+AZD	29
																			3	SN38+AZD	39
																			3	SN38+AZD	36
																			3	SN38+AZD	27
																			3	SN38+AZD	85
																			3	SN38+AZD	34
																			3	SN38+AZD	12
																			3	SN38+AZD	42
																			3	SN38+AZD	30
																			3	SN38+AZD	36
																			3	SN38+AZD	51
																			3	SN38+AZD	81
																			3	SN38+AZD	50
																			3	SN38+AZD	60
																			3	SN38+AZD	50
																			3	SN38+AZD	35
																			3	SN38+AZD	20
																			3	SN38+AZD	38
																			3	SN38+AZD	27
																			3	SN38+AZD	11
																			3	SN38+AZD	27
																			3	SN38+AZD	45
																			3	SN38+AZD	29
																			3	SN38+AZD	30
																			3	SN38+AZD	14
																			3	SN38+AZD	31
																			3	SN38+AZD	36
																			3	SN38+AZD	33
																			3	SN38+AZD	34
																			3	SN38+AZD	44
																			3	SN38+AZD	23
																			3	SN38+AZD	81
																			3	SN38+AZD	11
																			3	SN38+AZD	36
																			3	SN38+AZD	25
																			3	SN38+AZD	26
																			3	SN38+AZD	25
																			3	SN38+AZD	34
																			3	SN38+AZD	70
																			3	SN38+AZD	54
																			3	SN38+AZD	45
																			3	SN38+AZD	46
																			3	SN38+AZD	24
																			3	SN38+AZD	27
																			3	SN38+AZD	36
																			3	SN38+AZD	35
																			3	SN38+AZD	51
																			3	SN38+AZD	58
																			3	SN38+AZD	34
																			3	SN38+AZD	50
																			3	SN38+AZD	63
																			3	SN38+AZD	9
																			3	SN38+AZD	29
																			3	SN38+AZD	29
																			3	SN38+AZD	27
																			3	SN38+AZD	27
																			3	SN38+AZD	23
																			3	SN38+AZD	30
																			3	SN38+AZD	39
																			3	SN38+AZD	30
																			3	SN38+AZD	33
																			3	SN38+AZD	15
																			3	SN38+AZD	64
																			3	SN38+AZD	41
																			3	SN38+AZD	21
																			3	SN38+AZD	42
																			3	SN38+AZD	43
																			3	SN38+AZD	33
																			3	SN38+AZD	23
																			3	SN38+AZD	67
																			3	SN38+AZD	25
																			3	SN38+AZD	30
																			3	SN38+AZD	32
																			3	SN38+AZD	20
																			3	SN38+AZD	70
																			3	SN38+AZD	14
																			3	SN38+AZD	12
																			3	SN38+AZD	22
																			3	SN38+AZD	28
																			3	SN38+AZD	20
																			3	SN38+AZD	12
																			3	SN38+AZD	21
																			3	SN38+AZD	37
																			3	SN38+AZD	25
																			3	SN38+AZD	12
																			3	SN38+AZD	52
																			3	SN38+AZD	25
																			3	SN38+AZD	93
																			3	SN38+AZD	75
																			3	SN38+AZD	16
																			3	SN38+AZD	47
																			3	SN38+AZD	49
																			3	SN38+AZD	28
																			3	SN38+AZD	45
																			3	SN38+AZD	67
																			3	SN38+AZD	18
																			3	SN38+AZD	21
																			3	SN38+AZD	113
																			3	SN38+AZD	114
																			3	SN38+AZD	38
																			3	SN38+AZD	35
																			3	SN38+AZD	48
																			3	SN38+AZD	60
																			3	SN38+AZD	25
																			3	SN38+AZD	55
																			3	SN38+AZD	47
																			3	SN38+AZD	35
																			3	SN38+AZD	55
																			3	SN38+AZD	42
																			3	SN38+AZD	28
																			3	SN38+AZD	43
																			3	SN38+AZD	24
																			3	SN38+AZD	47
																			3	SN38+AZD	67
																			3	SN38+AZD	26
																			3	SN38+AZD	82
																			3	SN38+AZD	9
																			3	SN38+AZD	55
																			3	SN38+AZD	14
																			3	SN38+AZD	26
																			3	SN38+AZD	53
																			3	SN38+AZD	58
																			3	SN38+AZD	54
																			3	SN38+AZD	13
																			3	SN38+AZD	43
																			3	SN38+AZD	42
																			3	SN38+AZD	26
																			3	SN38+AZD	36
																			3	SN38+AZD	29
																			3	SN38+AZD	23
																			3	SN38+AZD	40
																			3	SN38+AZD	44
																			3	SN38+AZD	70
																			3	SN38+AZD	43
																			3	SN38+AZD	37
																			3	SN38+AZD	44
																			3	SN38+AZD	33
																			3	SN38+AZD	37
																			3	SN38+AZD	40
																			3	SN38+AZD	37
																			3	SN38+AZD	44
																			3	SN38+AZD	24
																			3	SN38+AZD	48
																			3	SN38+AZD	66
																			3	SN38+AZD	55
																			3	SN38+AZD	56
																			3	SN38+AZD	71
																			3	SN38+AZD	23
																			3	SN38+AZD	4
																			3	SN38+AZD	64
																			3	SN38+AZD	13
																			3	SN38+AZD	67
																			3	SN38+AZD	31
																			3	SN38+AZD	30
																			3	SN38+AZD	37
																			3	SN38+AZD	18
																			3	SN38+AZD	33
																			3	SN38+AZD	24
																			3	SN38+AZD	22
																			3	SN38+AZD	23
																			3	SN38+AZD	26
																			3	SN38+AZD	41
																			3	SN38+AZD	31
																			3	SN38+AZD	210
																			3	SN38+AZD	14
																			3	SN38+AZD	14
																			3	SN38+AZD	30
																			3	SN38+AZD	35
																			3	SN38+AZD	36
																			3	SN38+AZD	29
																			3	SN38+AZD	33
																			3	SN38+AZD	73
																			3	SN38+AZD	41
																			3	SN38+AZD	38
																			3	SN38+AZD	34
																			3	SN38+AZD	69
																			3	SN38+AZD	35
																			3	SN38+AZD	51
																			3	SN38+AZD	38
																			3	SN38+AZD	18
																			3	SN38+AZD	52
																			3	SN38+AZD	12
																			3	SN38+AZD	142
																			3	SN38+AZD	43
																			3	SN38+AZD	42
																			3	SN38+AZD	51
																			3	SN38+AZD
																			3	SN38+AZD	29
																			3	SN38+AZD	34
																			3	SN38+AZD	16
																			3	SN38+AZD	29
																			3	SN38+AZD	25
																			3	SN38+AZD	36
																			3	SN38+AZD	50
																			3	SN38+AZD	21
																			3	SN38+AZD	43
																			3	SN38+AZD	26
																			3	SN38+AZD	17
																			3	SN38+AZD	17
																			3	SN38+AZD	26
																			3	SN38+AZD	15
																			3	SN38+AZD	26
																			3	SN38+AZD	52
																			3	SN38+AZD	45
																			3	SN38+AZD	46
																			3	SN38+AZD	29
																			3	SN38+AZD	33
																			3	SN38+AZD	13
																			3	SN38+AZD	61
																			3	SN38+AZD	16
																			3	SN38+AZD	44
																			3	SN38+AZD	31
																			3	SN38+AZD	47
																			3	SN38+AZD	51
																			3	SN38+AZD	39
																			3	SN38+AZD	37
																			3	SN38+AZD	33
																			3	SN38+AZD	30
																			3	SN38+AZD	46
																			3	SN38+AZD	41
																			3	SN38+AZD	23
																			3	SN38+AZD	36
																			3	SN38+AZD	32
																			3	SN38+AZD	31
																			3	SN38+AZD	27
																			3	SN38+AZD	39
																			3	SN38+AZD	71
																			3	SN38+AZD	46
																			3	SN38+AZD	38
																			3	SN38+AZD	43
																			3	SN38+AZD	53
																			3	SN38+AZD	45
																			3	SN38+AZD	65
																			3	SN38+AZD	41
																			3	SN38+AZD	17
																			3	SN38+AZD	38
																			3	SN38+AZD	36
																			3	SN38+AZD	21
																			3	SN38+AZD	35
																			3	SN38+AZD	30
																			3	SN38+AZD	38
																			3	SN38+AZD	48
																			3	SN38+AZD	36
																			3	SN38+AZD	31
																			3	SN38+AZD	49
																			3	SN38+AZD	59
																			3	SN38+AZD	11
																			3	SN38+AZD	66
																			3	SN38+AZD	15
																			3	SN38+AZD	26
																			3	SN38+AZD	25
																			3	SN38+AZD	10
																			3	SN38+AZD	30
																			3	SN38+AZD	11
																			3	SN38+AZD	75
																			3	SN38+AZD	43
																			3	SN38+AZD	11
																			3	SN38+AZD	27
																			3	SN38+AZD	4
																			3	SN38+AZD	33
																			3	SN38+AZD	19
																			3	SN38+AZD	36
																			3	SN38+AZD	18
																			3	SN38+AZD	56
																			3	SN38+AZD	40
																			3	SN38+AZD	39
																			3	SN38+AZD	13
																			3	SN38+AZD	31
																			3	SN38+AZD	51
																			3	SN38+AZD	25
																			3	SN38+AZD	25
																			3	SN38+AZD	16
																			3	SN38+AZD	17
																			3	SN38+AZD	32
																			3	SN38+AZD	6
																			3	SN38+AZD	32
																			3	SN38+AZD	59
																			3	SN38+AZD	106
																			3	SN38+AZD	55
																			3	SN38+AZD	37
																			3	SN38+AZD	28
																			3	SN38+AZD	21
																			3	SN38+AZD	17
																			3	SN38+AZD	35
																			3	SN38+AZD	10
																			3	SN38+AZD	48
																			3	SN38+AZD	25
																			3	SN38+AZD	35
																			3	SN38+AZD	39
																			3	SN38+AZD	32
																			3	SN38+AZD	13
																			3	SN38+AZD	25
																			3	SN38+AZD	69
																			3	SN38+AZD	49
																			3	SN38+AZD	71
																			3	SN38+AZD	15
																			3	SN38+AZD	36
																			3	SN38+AZD	33
																			3	SN38+AZD	10
																			3	SN38+AZD	11
																			3	SN38+AZD	88
																			3	SN38+AZD	44
																			3	SN38+AZD	83
																			3	SN38+AZD	34
																			3	SN38+AZD	11
																			3	SN38+AZD	25
																			3	SN38+AZD	36
																			3	SN38+AZD	39
																			3	SN38+AZD	34
																			3	SN38+AZD	14
																			3	SN38+AZD	35
																			3	SN38+AZD	26
																			3	SN38+AZD	32
																			3	SN38+AZD	93
																			3	SN38+AZD	24
																			3	SN38+AZD	34
																			3	SN38+AZD	22
																			3	SN38+AZD	34
																			3	SN38+AZD	25
																			3	SN38+AZD	32
																			3	SN38+AZD	36
																			3	SN38+AZD	30
																			3	SN38+AZD	31
																			3	SN38+AZD	43
																			3	SN38+AZD	13
																			3	SN38+AZD	43
																			3	SN38+AZD	14
																			3	SN38+AZD	29
																			3	SN38+AZD	36
																			3	SN38+AZD	54
																			3	SN38+AZD	43
																			3	SN38+AZD	27
																			3	SN38+AZD	8
																			3	SN38+AZD	43
																			3	SN38+AZD	7
																			3	SN38+AZD	35
																			3	SN38+AZD	11
																			3	SN38+AZD	20
																			3	SN38+AZD	13
																			3	SN38+AZD	40
																			3	SN38+AZD	32
																			3	SN38+AZD	16
																			3	SN38+AZD	43
																			3	SN38+AZD	11
																			3	SN38+AZD	71
																			3	SN38+AZD	21
																			3	SN38+AZD	19
																			3	SN38+AZD	78
																			3	SN38+AZD	34
																			3	SN38+AZD	46
																			3	SN38+AZD	43
																			3	SN38+AZD	11
																			3	SN38+AZD	32
																			3	SN38+AZD	35
																			3	SN38+AZD	33
																			3	SN38+AZD	28
																			3	SN38+AZD	27
																			3	SN38+AZD	28
																			3	SN38+AZD	51
																			3	SN38+AZD	16
																			3	SN38+AZD	53
																			3	SN38+AZD	50
																			3	SN38+AZD	6
																			3	SN38+AZD	25
																			3	SN38+AZD	24
																			3	SN38+AZD	33
																			3	SN38+AZD	35
																			3	SN38+AZD	55
																			3	SN38+AZD	17
																			3	SN38+AZD	14
																			3	SN38+AZD	45
																			3	SN38+AZD	14
																			3	SN38+AZD	66
																			3	SN38+AZD	69
																			3	SN38+AZD	41
																			3	SN38+AZD	46
																			3	SN38+AZD
																			3	SN38+AZD	37
																			3	SN38+AZD	74
																			3	SN38+AZD	20
																			3	SN38+AZD	33
																			3	SN38+AZD	46
																			3	SN38+AZD	37
																			3	SN38+AZD	58
																			3	SN38+AZD	16
																			3	SN38+AZD	17
																			3	SN38+AZD	55
																			3	SN38+AZD	45
																			3	SN38+AZD	23
																			3	SN38+AZD	78
																			3	SN38+AZD	34
																			3	SN38+AZD	76
																			3	SN38+AZD	15
																			3	SN38+AZD	16
																			3	SN38+AZD	70
																			3	SN38+AZD	71
																			3	SN38+AZD	29
																			3	SN38+AZD	33
																			3	SN38+AZD	42
																			3	SN38+AZD	36
																			3	SN38+AZD	46
																			3	SN38+AZD	25
																			3	SN38+AZD	16
																			3	SN38+AZD	61
																			3	SN38+AZD	35
																			3	SN38+AZD	49
																			3	SN38+AZD	32
																			3	SN38+AZD	10
																			3	SN38+AZD
																			3	SN38+AZD	29

## Sheet: POOL
		replicate	condition	CldU
		1	NT	120
		1	NT	84
		1	NT	90
		1	NT	64
		1	NT	50
		1	NT	62
		1	NT	62
		1	NT	126
		1	NT	60
		1	NT	53
		1	NT	62
		1	NT	54
		1	NT	49
		1	NT	53
		1	NT	47
		1	NT	51
		1	NT	51
		1	NT	40
		1	NT	46
		1	NT	125
		1	NT	45
		1	NT	109
		1	NT	48
		1	NT	44
		1	NT	49
		1	NT	49
		1	NT	40
		1	NT	43
		1	NT	51
		1	NT	84
		1	NT	41
		1	NT	31
		1	NT	42
		1	NT	51
		1	NT	15
		1	NT	36
		1	NT	43
		1	NT	44
		1	NT	32
		1	NT	21
		1	NT	28
		1	NT	69
		1	NT	37
		1	NT	41
		1	NT	28
		1	NT	40
		1	NT	44
		1	NT	35
		1	NT	40
		1	NT	44
		1	NT	72
		1	NT	46
		1	NT	53
		1	NT	84
		1	NT	51
		1	NT	41
		1	NT	21
		1	NT	91
		1	NT	48
		1	NT	108
		1	NT	32
		1	NT	10
		1	NT	4
		1	NT	39
		1	NT	33
		1	NT	4
		1	NT	39
		1	NT	68
		1	NT	44
		1	NT	103
		1	NT	20
		1	NT	44
		1	NT	43
		1	NT	13
		1	NT	66
		1	NT	34
		1	NT	45
		1	NT	34
		1	NT	42
		1	NT	28
		1	NT	40
		1	NT	40
		1	NT	12
		1	NT	54
		1	NT	20
		1	NT	10
		1	NT	58
		1	NT	100
		1	NT	11
		1	NT	31
		1	NT	10
		1	NT	3
		1	NT	25
		1	NT	27
		1	NT	36
		1	NT	32
		1	NT	32
		1	NT	32
		1	NT	29
		1	NT	55
		1	NT	28
		1	NT	33
		1	NT	39
		1	NT	31
		1	NT	34
		1	NT	22
		1	NT	42
		1	NT	103
		1	NT	28
		1	NT	35
		1	NT	30
		1	NT	51
		1	NT	16
		1	NT	24
		1	NT	26
		1	NT	18
		1	NT	38
		1	NT	29
		1	NT	13
		1	NT	53
		1	NT	29
		1	NT	28
		1	NT	22
		1	NT	29
		1	NT	46
		1	NT	23
		1	NT	34
		1	NT	26
		1	NT	17
		1	NT	49
		1	NT	58
		1	NT	34
		1	NT	24
		1	NT	55
		1	NT	34
		1	NT	27
		1	NT	24
		1	NT	42
		1	NT	11
		1	NT	17
		1	NT	22
		1	NT	33
		1	NT	30
		1	NT	37
		1	NT	47
		1	NT	34
		1	NT	37
		1	NT	39
		1	NT	41
		1	NT	40
		1	NT	70
		1	NT	32
		1	NT	35
		1	NT	22
		1	NT	37
		1	NT	21
		1	NT	64
		1	NT	24
		1	NT	24
		1	NT	24
		1	NT	26
		1	NT	27
		1	NT	27
		1	NT	29
		1	NT	16
		1	NT	4
		1	NT	17
		1	NT	20
		1	NT	20
		1	NT	20
		1	NT	31
		1	NT	28
		1	NT	201
		1	NT	29
		1	NT	124
		1	NT	77
		1	NT	29
		1	NT	56
		1	NT	87
		1	NT	58
		1	NT	49
		1	NT	45
		1	NT	29
		1	NT	39
		1	NT	39
		1	NT	30
		1	NT	22
		1	NT	41
		1	NT	45
		1	NT	45
		1	NT	39
		1	NT	62
		1	NT	36
		1	NT	39
		1	NT	34
		1	NT	35
		1	NT	122
		1	NT	40
		1	NT	28
		1	NT	29
		1	NT	32
		1	NT	40
		1	NT	39
		1	NT	51
		1	NT	32
		1	NT	33
		1	NT	17
		1	NT	62
		1	NT	32
		1	NT	48
		1	NT	32
		1	NT	71
		1	NT	29
		1	NT	28
		1	NT	19
		1	NT	18
		1	NT	32
		1	NT	28
		1	NT	35
		1	NT	14
		1	NT	31
		1	NT	32
		1	NT	26
		1	NT	57
		1	NT	39
		1	NT	52
		1	NT	32
		1	NT	40
		1	NT	78
		1	NT	38
		1	NT	2
		1	NT	30
		1	NT	46
		1	NT	9
		1	NT	64
		1	NT	48
		1	NT	37
		1	NT	25
		1	NT	20
		1	NT	28
		1	NT	47
		1	NT	38
		1	NT	11
		1	NT	22
		1	NT	16
		1	NT	5
		1	NT	53
		1	NT	23
		1	NT	57
		1	NT	69
		1	NT	48
		1	NT	56
		1	NT	28
		1	NT	44
		1	NT	40
		1	NT	52
		1	NT	44
		1	NT	42
		1	NT	21
		1	NT	36
		1	NT	48
		1	NT	21
		1	NT	51
		1	NT	13
		1	NT	69
		1	NT	41
		1	NT	67
		1	NT	106
		1	NT	53
		1	NT	35
		1	NT	35
		1	NT	36
		1	NT	43
		1	NT	44
		1	NT	20
		1	NT	26
		1	NT	40
		1	NT	122
		1	NT	65
		1	NT	30
		1	NT	58
		1	NT	57
		1	NT	35
		1	NT	59
		1	NT	46
		1	NT	44
		1	NT	46
		1	NT	32
		1	NT	41
		1	NT	67
		1	NT	64
		1	NT	65
		1	NT	30
		1	NT	26
		1	NT	37
		1	NT	35
		1	NT	47
		1	NT	90
		1	NT	72
		1	NT	30
		1	NT	32
		1	NT	38
		1	NT	67
		1	NT	105
		1	NT	44
		1	NT	73
		1	NT	64
		1	NT	41
		1	NT	36
		1	NT	47
		1	NT	56
		1	NT	20
		1	NT	37
		1	NT	37
		1	NT	38
		1	NT	43
		1	NT	27
		1	NT	40
		1	NT	158
		1	NT	86
		1	NT	73
		1	NT	60
		1	NT	53
		1	NT	66
		1	NT	56
		1	NT	29
		1	NT	73
		1	NT	116
		1	NT	40
		1	NT	52
		1	NT	56
		1	NT	50
		1	NT	45
		1	NT	40
		1	NT	74
		1	NT	38
		1	NT	38
		1	NT	34
		1	NT	37
		1	NT	56
		1	NT	37
		1	NT	49
		1	NT	33
		1	NT	36
		1	NT	34
		1	NT	43
		1	NT	89
		1	NT	33
		1	NT	26
		1	NT	39
		1	NT	38
		1	NT	119
		1	NT	22
		1	NT	41
		1	NT	14
		1	NT	37
		1	NT	70
		1	NT	70
		1	NT	86
		1	NT	67
		1	NT	52
		1	NT	56
		1	NT	48
		1	NT	54
		1	NT	8
		1	NT	53
		1	NT	46
		1	NT	50
		1	NT	34
		1	NT	45
		1	NT	51
		1	NT	43
		1	NT	63
		1	NT	41
		1	NT	38
		1	NT	22
		1	NT	39
		1	NT	38
		1	NT	30
		1	NT	52
		1	NT	31
		1	NT	47
		1	NT	37
		1	NT	49
		1	NT	51
		1	NT	41
		1	NT	30
		1	NT	37
		1	NT	27
		1	NT	40
		1	NT	25
		1	NT	19
		1	NT	30
		1	NT	83
		1	NT	19
		1	NT	39
		1	NT	25
		1	NT	29
		1	NT	29
		1	NT	39
		1	NT	49
		1	NT	35
		1	NT	36
		1	NT	29
		1	NT	28
		1	NT	48
		1	NT	52
		1	NT	35
		1	NT	16
		1	NT	19
		1	NT	34
		1	NT	31
		1	NT	68
		1	NT	28
		1	NT	39
		1	NT	36
		1	NT	46
		1	NT	12
		1	NT	153
		1	NT	87
		1	NT	99
		1	NT	44
		1	NT	72
		1	NT	65
		1	NT	54
		1	NT	118
		1	NT	43
		1	NT	35
		1	NT	33
		1	NT	61
		1	NT	33
		1	NT	34
		1	NT	40
		1	NT	28
		1	NT	29
		1	NT	48
		1	NT	104
		1	NT	42
		1	NT	109
		1	NT	42
		1	NT	57
		1	NT	39
		1	NT	102
		1	NT	34
		1	NT	43
		1	NT	31
		1	NT	40
		1	NT	91
		1	NT	37
		1	NT	77
		1	NT	56
		1	NT	69
		1	NT	21
		1	NT	59
		1	NT	23
		1	NT	16
		1	NT	77
		1	NT	12
		1	NT	27
		1	NT	10
		1	NT	165
		1	NT	77
		1	NT	72
		1	NT	53
		1	NT	46
		1	NT	66
		1	NT	91
		1	NT	53
		1	NT	43
		1	NT	94
		1	NT	28
		1	NT	75
		1	NT	29
		1	NT	63
		1	NT	58
		1	NT	43
		1	NT	41
		1	NT	38
		1	NT	108
		1	NT	59
		1	NT	52
		1	NT	56
		1	NT	37
		1	NT	42
		1	NT	25
		1	NT	58
		1	NT	37
		1	NT	46
		1	NT	40
		1	NT	28
		1	NT	46
		1	NT	46
		1	NT	38
		1	NT	38
		1	NT	40
		1	NT	36
		1	NT	56
		1	NT	48
		1	NT	3
		1	NT	56
		1	NT	74
		1	NT	140
		1	NT	63
		1	NT	58
		1	NT	91
		1	NT	142
		1	NT	39
		1	NT	81
		1	NT	33
		1	NT	47
		1	NT	46
		1	NT	39
		1	NT	41
		1	NT	35
		1	NT	47
		1	NT	60
		1	NT	31
		1	NT	22
		1	NT	39
		1	NT	40
		1	NT	33
		1	NT	59
		1	NT	101
		1	NT	20
		1	NT	52
		1	NT	38
		1	NT	37
		1	NT	25
		1	NT	31
		1	NT	43
		1	NT	42
		1	NT	31
		1	NT	37
		1	NT	52
		1	NT	50
		1	NT	28
		1	NT	26
		1	NT	119
		1	NT	103
		1	NT	164
		1	NT	51
		1	NT	23
		1	NT	52
		1	NT	51
		1	NT	56
		1	NT	22
		1	NT	43
		1	NT	69
		1	NT	52
		1	NT	44
		1	NT	52
		1	NT	32
		1	NT	17
		1	NT	86
		1	NT	37
		1	NT	39
		1	NT	37
		1	NT	44
		1	NT	74
		1	NT	65
		1	NT	33
		1	NT	40
		1	NT	30
		1	NT	41
		1	NT	9
		1	NT	29
		1	NT	48
		1	NT	23
		1	NT	40
		1	NT	4
		1	NT	21
		1	NT	38
		1	NT	78
		1	NT	39
		1	NT	36
		1	NT	41
		1	NT	45
		1	NT	20
		1	NT	66
		1	NT	61
		1	NT	42
		1	NT	52
		1	NT	78
		1	NT	55
		1	NT	76
		1	NT	23
		1	NT	48
		1	NT	62
		1	NT	79
		1	NT	47
		1	NT	43
		1	NT	31
		1	NT	64
		1	NT	42
		1	NT	112
		1	NT	40
		1	NT	52
		1	NT	38
		1	NT	35
		1	NT	32
		1	NT	36
		1	NT	22
		1	NT	52
		1	NT	56
		1	NT	46
		1	NT	29
		1	NT	16
		1	NT	49
		1	NT	51
		1	NT	13
		1	NT	33
		1	NT	101
		1	NT	63
		1	NT	62
		1	NT	69
		1	NT	59
		1	NT	43
		1	NT	56
		1	NT	42
		1	NT	47
		1	NT	41
		1	NT	36
		1	NT	46
		1	NT	63
		1	NT	40
		1	NT	24
		1	NT	36
		1	NT	32
		1	NT	40
		1	NT	22
		1	NT	24
		1	NT	18
		1	NT	12
		1	NT	30
		1	NT	40
		1	NT	26
		1	NT	94
		1	NT	99
		1	NT	55
		1	NT	107
		1	NT	88
		1	NT	79
		1	NT	12
		1	NT	50
		1	NT	33
		1	NT	55
		1	NT	73
		1	NT	60
		1	NT	52
		1	NT	38
		1	NT	46
		1	NT	47
		1	NT	183
		1	NT	88
		1	NT	46
		1	NT	46
		1	NT	52
		1	NT	100
		1	NT	47
		1	NT	23
		1	NT	63
		1	NT	35
		1	NT	103
		1	NT	42
		1	NT	67
		1	NT	32
		1	NT	6
		1	NT	49
		1	NT	41
		1	NT	30
		1	NT	54
		1	NT	59
		1	NT	53
		1	NT	40
		1	NT	33
		1	NT	46
		1	NT	31
		1	NT	69
		1	NT	35
		1	NT	45
		1	NT	29
		1	NT	34
		1	NT	66
		1	NT	56
		1	NT	24
		1	NT	63
		1	NT	23
		1	NT	49
		1	NT	26
		1	NT	24
		1	NT	28
		1	NT	23
		1	NT	15
		1	NT	62
		1	NT	40
		1	NT	54
		1	NT	20
		1	NT	42
		1	NT	45
		1	NT	14
		1	NT	24
		1	NT	50
		1	NT	60
		1	NT	60
		1	NT	38
		1	NT
		1	NT	43
		1	NT	21
		1	NT	79
		1	NT	243
		1	NT	73
		1	NT	60
		1	NT	51
		1	NT	54
		1	NT	61
		1	NT	72
		1	NT	52
		1	NT	61
		1	NT	61
		1	NT	43
		1	NT	110
		1	NT	45
		1	NT	30
		1	NT	54
		1	NT	48
		1	NT	39
		1	NT	31
		1	NT	92
		1	NT	61
		1	NT	40
		1	NT	47
		1	NT	9
		1	NT	35
		1	NT	34
		1	NT	54
		1	NT	43
		1	NT	55
		1	NT	24
		1	NT	70
		1	NT	43
		1	NT	40
		1	NT	49
		1	NT	28
		1	NT	38
		1	NT	27
		1	NT	40
		1	NT	32
		1	NT	43
		1	NT	25
		1	NT	35
		1	NT	20
		1	NT	41
		1	NT	30
		1	NT	19
		1	NT	35
		1	NT	22
		1	NT	32
		1	NT	68
		1	NT	68
		1	NT	51
		1	NT	47
		1	NT	99
		1	NT	55
		1	NT	45
		1	NT	87
		1	NT	131
		1	NT	49
		1	NT	30
		1	NT	39
		1	NT	39
		1	NT	41
		1	NT	45
		1	NT	38
		1	NT	54
		1	NT	71
		1	NT	56
		1	NT	36
		1	NT	32
		1	NT	53
		1	NT	47
		1	NT	62
		1	NT	42
		1	NT	46
		1	NT	35
		1	NT	52
		1	NT	26
		1	NT	26
		1	NT	48
		1	NT	46
		1	NT	30
		1	NT	61
		1	NT	43
		1	NT	126
		1	NT	45
		1	NT	38
		1	NT	43
		1	NT	67
		1	NT	9
		1	NT	53
		1	NT	96
		1	NT	56
		1	NT	52
		1	NT	39
		1	NT	43
		1	NT	29
		1	NT	52
		1	NT	37
		1	NT	52
		1	NT	26
		1	NT	70
		1	NT	24
		1	NT	33
		1	NT	30
		1	NT	25
		1	NT	19
		1	NT	28
		1	NT	34
		1	NT	59
		1	NT	69
		1	NT	74
		1	NT	83
		1	NT	42
		1	NT	21
		1	NT	41
		1	NT	128
		1	NT	96
		1	NT	46
		1	NT	53
		1	NT	38
		1	NT	36
		1	NT	64
		1	NT	23
		1	NT	99
		1	NT	34
		1	NT	42
		1	NT	36
		1	NT	22
		1	NT	46
		1	NT	105
		1	NT	141
		1	NT	65
		1	NT	64
		1	NT	34
		1	NT	25
		1	NT	52
		1	NT	34
		1	NT	47
		1	NT	33
		1	NT	42
		1	NT	32
		1	NT	60
		1	NT	32
		1	NT	56
		1	NT	93
		1	NT	15
		1	NT	27
		1	NT	55
		1	NT	82
		1	NT	57
		1	NT	46
		1	NT	44
		1	NT	49
		1	NT	46
		1	NT	41
		1	NT	39
		1	NT	38
		1	NT	34
		1	NT	7
		1	NT	48
		1	NT	49
		1	SN38	75
		1	SN38	22
		1	SN38	39
		1	SN38	31
		1	SN38	38
		1	SN38	19
		1	SN38	93
		1	SN38	74
		1	SN38	38
		1	SN38	79
		1	SN38	19
		1	SN38	50
		1	SN38	73
		1	SN38	22
		1	SN38	20
		1	SN38	14
		1	SN38	28
		1	SN38	79
		1	SN38	11
		1	SN38	55
		1	SN38	67
		1	SN38	11
		1	SN38	17
		1	SN38	19
		1	SN38	32
		1	SN38	30
		1	SN38	39
		1	SN38	51
		1	SN38	51
		1	SN38	24
		1	SN38	13
		1	SN38	13
		1	SN38	69
		1	SN38	33
		1	SN38	23
		1	SN38	7
		1	SN38	45
		1	SN38	24
		1	SN38	75
		1	SN38	55
		1	SN38	60
		1	SN38	78
		1	SN38	20
		1	SN38	19
		1	SN38	36
		1	SN38	49
		1	SN38	39
		1	SN38	42
		1	SN38	37
		1	SN38	24
		1	SN38	41
		1	SN38	19
		1	SN38	5
		1	SN38	44
		1	SN38	51
		1	SN38	31
		1	SN38	16
		1	SN38	63
		1	SN38	66
		1	SN38	93
		1	SN38	20
		1	SN38	47
		1	SN38	17
		1	SN38	26
		1	SN38	12
		1	SN38	50
		1	SN38	35
		1	SN38	43
		1	SN38	19
		1	SN38	24
		1	SN38	40
		1	SN38	20
		1	SN38	39
		1	SN38	32
		1	SN38	13
		1	SN38	38
		1	SN38	13
		1	SN38	60
		1	SN38	29
		1	SN38	9
		1	SN38	48
		1	SN38	9
		1	SN38	34
		1	SN38	14
		1	SN38	20
		1	SN38	26
		1	SN38	36
		1	SN38	51
		1	SN38	40
		1	SN38	9
		1	SN38	14
		1	SN38	22
		1	SN38	38
		1	SN38	45
		1	SN38	25
		1	SN38	28
		1	SN38	31
		1	SN38	14
		1	SN38	39
		1	SN38	32
		1	SN38	39
		1	SN38	45
		1	SN38	40
		1	SN38	7
		1	SN38	9
		1	SN38	66
		1	SN38	36
		1	SN38	22
		1	SN38	89
		1	SN38	18
		1	SN38	26
		1	SN38	35
		1	SN38	36
		1	SN38	36
		1	SN38	36
		1	SN38	17
		1	SN38	20
		1	SN38	12
		1	SN38	15
		1	SN38	25
		1	SN38	42
		1	SN38	2
		1	SN38	48
		1	SN38	42
		1	SN38	48
		1	SN38	30
		1	SN38	14
		1	SN38	40
		1	SN38	11
		1	SN38	37
		1	SN38	9
		1	SN38	29
		1	SN38	13
		1	SN38	45
		1	SN38	49
		1	SN38	11
		1	SN38	29
		1	SN38	39
		1	SN38	43
		1	SN38	13
		1	SN38	22
		1	SN38	39
		1	SN38	26
		1	SN38	25
		1	SN38	43
		1	SN38	24
		1	SN38	54
		1	SN38	32
		1	SN38	57
		1	SN38	41
		1	SN38	37
		1	SN38	14
		1	SN38	12
		1	SN38	33
		1	SN38	33
		1	SN38	10
		1	SN38	35
		1	SN38	38
		1	SN38	23
		1	SN38	72
		1	SN38	53
		1	SN38	44
		1	SN38	13
		1	SN38	47
		1	SN38	53
		1	SN38	49
		1	SN38	53
		1	SN38	32
		1	SN38	19
		1	SN38	26
		1	SN38	19
		1	SN38	39
		1	SN38	9
		1	SN38	27
		1	SN38	34
		1	SN38	32
		1	SN38	45
		1	SN38	44
		1	SN38	24
		1	SN38	21
		1	SN38	10
		1	SN38	48
		1	SN38	41
		1	SN38	26
		1	SN38	19
		1	SN38	24
		1	SN38	30
		1	SN38	16
		1	SN38	10
		1	SN38	20
		1	SN38	37
		1	SN38	23
		1	SN38	33
		1	SN38	43
		1	SN38	31
		1	SN38	29
		1	SN38	62
		1	SN38	31
		1	SN38	23
		1	SN38	33
		1	SN38	23
		1	SN38	14
		1	SN38	52
		1	SN38	31
		1	SN38	43
		1	SN38	23
		1	SN38	16
		1	SN38	23
		1	SN38	58
		1	SN38	25
		1	SN38	25
		1	SN38	32
		1	SN38	49
		1	SN38	32
		1	SN38	9
		1	AZD	47
		1	AZD	38
		1	AZD	81
		1	AZD	117
		1	AZD	55
		1	AZD	47
		1	AZD	42
		1	AZD	43
		1	AZD	44
		1	AZD	44
		1	AZD	37
		1	AZD	43
		1	AZD	47
		1	AZD	32
		1	AZD	43
		1	AZD	27
		1	AZD	29
		1	AZD	50
		1	AZD	29
		1	AZD	55
		1	AZD	79
		1	AZD	29
		1	AZD	74
		1	AZD	35
		1	AZD	69
		1	AZD	16
		1	AZD	21
		1	AZD	44
		1	AZD	86
		1	AZD	85
		1	AZD	105
		1	AZD	67
		1	AZD	48
		1	AZD	20
		1	AZD	71
		1	AZD	39
		1	AZD	58
		1	AZD	33
		1	AZD	37
		1	AZD	36
		1	AZD	40
		1	AZD	36
		1	AZD	41
		1	AZD	28
		1	AZD	44
		1	AZD	31
		1	AZD	13
		1	AZD	31
		1	AZD	30
		1	AZD	67
		1	AZD	24
		1	AZD	30
		1	AZD	31
		1	AZD	30
		1	AZD	26
		1	AZD	29
		1	AZD	22
		1	AZD	23
		1	AZD	33
		1	AZD	63
		1	AZD	40
		1	AZD	34
		1	AZD	80
		1	AZD	22
		1	AZD	31
		1	AZD	31
		1	AZD	45
		1	AZD	35
		1	AZD	65
		1	AZD	20
		1	AZD	34
		1	AZD	37
		1	AZD	15
		1	AZD	39
		1	AZD	16
		1	AZD	60
		1	AZD	42
		1	AZD	31
		1	AZD	132
		1	AZD	65
		1	AZD	42
		1	AZD	47
		1	AZD	39
		1	AZD	24
		1	AZD	44
		1	AZD	48
		1	AZD	38
		1	AZD	31
		1	AZD	39
		1	AZD	45
		1	AZD	67
		1	AZD	42
		1	AZD	36
		1	AZD	90
		1	AZD	80
		1	AZD	35
		1	AZD	25
		1	AZD	25
		1	AZD	34
		1	AZD	35
		1	AZD	36
		1	AZD	18
		1	AZD	7
		1	AZD	42
		1	AZD	23
		1	AZD	25
		1	AZD	48
		1	AZD	43
		1	AZD	18
		1	AZD	48
		1	AZD	7
		1	AZD	35
		1	AZD	27
		1	AZD	7
		1	AZD	9
		1	AZD	95
		1	AZD	11
		1	AZD	21
		1	AZD	53
		1	AZD	58
		1	AZD	71
		1	AZD	49
		1	AZD	35
		1	AZD	44
		1	AZD	48
		1	AZD	110
		1	AZD	10
		1	AZD	29
		1	AZD	28
		1	AZD	36
		1	AZD	30
		1	AZD	67
		1	AZD	38
		1	AZD	36
		1	AZD	67
		1	AZD	31
		1	AZD	32
		1	AZD	31
		1	AZD	30
		1	AZD	31
		1	AZD	30
		1	AZD	18
		1	AZD	36
		1	AZD	32
		1	AZD	33
		1	AZD	13
		1	AZD	39
		1	AZD	45
		1	AZD	43
		1	AZD	29
		1	AZD	66
		1	AZD	21
		1	AZD	71
		1	AZD	25
		1	AZD	48
		1	AZD	95
		1	AZD	150
		1	AZD	24
		1	AZD	21
		1	AZD	42
		1	AZD	41
		1	AZD	4
		1	AZD	33
		1	AZD	27
		1	AZD	28
		1	AZD	57
		1	AZD	40
		1	AZD	38
		1	AZD	48
		1	AZD	64
		1	AZD	51
		1	AZD	98
		1	AZD	51
		1	AZD	13
		1	AZD	213
		1	AZD	47
		1	AZD	81
		1	AZD	41
		1	AZD	86
		1	AZD	40
		1	AZD	48
		1	AZD	34
		1	AZD	60
		1	AZD	29
		1	AZD	69
		1	AZD	45
		1	AZD	11
		1	AZD	26
		1	AZD	66
		1	AZD	20
		1	AZD	94
		1	AZD	39
		1	AZD	41
		1	AZD	25
		1	AZD	47
		1	AZD	67
		1	AZD	47
		1	AZD	46
		1	AZD	47
		1	AZD	21
		1	AZD	89
		1	AZD	73
		1	AZD	41
		1	AZD	42
		1	AZD	18
		1	AZD	39
		1	AZD	32
		1	AZD	33
		1	AZD	43
		1	AZD	8
		1	AZD	40
		1	AZD	13
		1	AZD	90
		1	AZD	19
		1	AZD	9
		1	AZD	119
		1	AZD	91
		1	AZD	59
		1	AZD	49
		1	AZD	50
		1	AZD	45
		1	AZD	43
		1	AZD	31
		1	AZD	55
		1	AZD	18
		1	AZD	70
		1	AZD	56
		1	AZD	20
		1	AZD	36
		1	AZD	47
		1	AZD	17
		1	AZD	51
		1	AZD	37
		1	AZD	42
		1	AZD	24
		1	AZD	53
		1	AZD	54
		1	AZD	59
		1	AZD	40
		1	AZD	39
		1	AZD	44
		1	AZD	27
		1	AZD	26
		1	AZD	30
		1	AZD	41
		1	AZD	37
		1	AZD	35
		1	AZD	54
		1	AZD	31
		1	AZD	34
		1	AZD	28
		1	AZD	40
		1	AZD	33
		1	AZD	50
		1	AZD	27
		1	AZD	19
		1	AZD	10
		1	AZD	53
		1	AZD	46
		1	AZD	76
		1	AZD	65
		1	AZD	25
		1	AZD	42
		1	AZD	42
		1	AZD	30
		1	AZD	76
		1	AZD	55
		1	AZD	46
		1	AZD	85
		1	AZD	38
		1	AZD	31
		1	AZD	30
		1	AZD	55
		1	AZD	18
		1	AZD	22
		1	AZD	60
		1	AZD	108
		1	AZD	58
		1	AZD	37
		1	AZD	53
		1	AZD	75
		1	AZD	45
		1	AZD	129
		1	AZD	115
		1	AZD	35
		1	AZD	49
		1	AZD	38
		1	AZD	49
		1	AZD	58
		1	AZD	29
		1	AZD	80
		1	AZD	24
		1	AZD	60
		1	AZD	43
		1	AZD	38
		1	AZD	49
		1	AZD	34
		1	AZD	50
		1	AZD	53
		1	AZD	39
		1	AZD	29
		1	AZD	62
		1	AZD	35
		1	AZD	47
		1	AZD	50
		1	AZD	78
		1	AZD	27
		1	AZD	78
		1	AZD	42
		1	AZD	36
		1	AZD	15
		1	AZD	20
		1	AZD	39
		1	AZD	44
		1	AZD	10
		1	AZD	51
		1	AZD	43
		1	AZD	34
		1	AZD	40
		1	AZD	36
		1	AZD	44
		1	AZD	16
		1	AZD	52
		1	AZD	27
		1	AZD	30
		1	AZD	53
		1	AZD	10
		1	AZD	20
		1	AZD	12
		1	AZD	119
		1	AZD	46
		1	AZD	36
		1	AZD	37
		1	AZD	29
		1	AZD	98
		1	AZD	205
		1	AZD	77
		1	AZD	55
		1	AZD	56
		1	AZD	51
		1	AZD	72
		1	AZD	45
		1	AZD	63
		1	AZD	38
		1	AZD	47
		1	AZD	41
		1	AZD	38
		1	AZD	42
		1	AZD	30
		1	AZD	35
		1	AZD	51
		1	AZD	37
		1	AZD	46
		1	AZD	48
		1	AZD	51
		1	AZD	22
		1	AZD	123
		1	AZD	34
		1	AZD	24
		1	AZD	19
		1	AZD	27
		1	AZD	81
		1	AZD	33
		1	AZD	15
		1	AZD	52
		1	AZD	58
		1	AZD	37
		1	AZD	15
		1	AZD	44
		1	AZD	27
		1	AZD	14
		1	AZD	37
		1	AZD	21
		1	AZD	42
		1	AZD	6
		1	AZD	32
		1	AZD	44
		1	AZD	37
		1	AZD	50
		1	AZD	50
		1	AZD	47
		1	AZD	46
		1	AZD	75
		1	AZD	42
		1	AZD	27
		1	AZD	38
		1	AZD	41
		1	AZD	22
		1	AZD	48
		1	AZD	40
		1	AZD	39
		1	AZD	131
		1	AZD	75
		1	AZD	53
		1	AZD	62
		1	AZD	78
		1	AZD	53
		1	AZD	41
		1	AZD	44
		1	AZD	43
		1	AZD	41
		1	AZD	57
		1	AZD	40
		1	AZD	38
		1	AZD	51
		1	AZD	53
		1	AZD	57
		1	AZD	40
		1	AZD	28
		1	AZD	56
		1	AZD	59
		1	AZD	56
		1	AZD	7
		1	AZD	10
		1	AZD	94
		1	AZD	49
		1	AZD	86
		1	AZD	54
		1	AZD	41
		1	AZD	44
		1	AZD	33
		1	AZD	46
		1	AZD	12
		1	AZD	23
		1	AZD	51
		1	AZD	65
		1	AZD	43
		1	AZD	36
		1	AZD	35
		1	AZD	47
		1	AZD	39
		1	AZD	14
		1	AZD	38
		1	AZD	31
		1	AZD	166
		1	AZD	10
		1	AZD	49
		1	AZD	41
		1	AZD	27
		1	AZD	47
		1	AZD	20
		1	AZD	24
		1	AZD	65
		1	AZD	61
		1	AZD	48
		1	AZD	74
		1	AZD	50
		1	AZD	54
		1	AZD	47
		1	AZD	60
		1	AZD	47
		1	AZD	33
		1	AZD	17
		1	AZD	40
		1	AZD	41
		1	AZD	30
		1	AZD	19
		1	AZD	39
		1	AZD	30
		1	AZD	42
		1	AZD	42
		1	AZD	44
		1	AZD	37
		1	AZD	17
		1	AZD	28
		1	AZD	40
		1	AZD	26
		1	AZD	50
		1	AZD	120
		1	AZD	47
		1	AZD	59
		1	AZD	64
		1	AZD	54
		1	AZD	74
		1	AZD	41
		1	AZD	49
		1	AZD	54
		1	AZD	52
		1	AZD	50
		1	AZD	52
		1	AZD	128
		1	AZD	53
		1	AZD	31
		1	AZD	38
		1	AZD	60
		1	AZD	48
		1	AZD	26
		1	AZD	50
		1	AZD	37
		1	AZD	53
		1	AZD	41
		1	AZD	55
		1	AZD	29
		1	AZD	5
		1	AZD	29
		1	AZD	117
		1	AZD	60
		1	AZD	42
		1	AZD	34
		1	AZD	24
		1	AZD	45
		1	AZD	27
		1	AZD	27
		1	AZD	63
		1	AZD	35
		1	AZD	74
		1	AZD	15
		1	AZD	44
		1	AZD	42
		1	AZD	40
		1	AZD	20
		1	AZD	77
		1	AZD	55
		1	AZD	41
		1	AZD	22
		1	AZD	21
		1	AZD	43
		1	AZD	127
		1	AZD	37
		1	AZD	87
		1	AZD	31
		1	AZD	29
		1	AZD	44
		1	AZD	32
		1	AZD	29
		1	AZD	29
		1	AZD	30
		1	AZD	34
		1	AZD	28
		1	AZD	32
		1	AZD	25
		1	AZD	34
		1	AZD	20
		1	AZD	36
		1	AZD	37
		1	AZD	28
		1	AZD	31
		1	AZD	22
		1	AZD	95
		1	AZD	26
		1	AZD	28
		1	AZD	49
		1	AZD	42
		1	AZD	39
		1	AZD	25
		1	AZD	30
		1	AZD	20
		1	AZD	6
		1	AZD	33
		1	AZD	45
		1	AZD	14
		1	AZD	29
		1	AZD	31
		1	AZD	44
		1	AZD	48
		1	AZD	42
		1	AZD	6
		1	AZD	32
		1	AZD	15
		1	AZD	18
		1	AZD	64
		1	AZD	146
		1	AZD	33
		1	AZD	114
		1	AZD	108
		1	AZD	34
		1	AZD	31
		1	AZD	65
		1	AZD	82
		1	AZD	33
		1	AZD	57
		1	AZD	80
		1	AZD	91
		1	AZD	75
		1	AZD	45
		1	AZD	146
		1	AZD	60
		1	AZD	52
		1	AZD	58
		1	AZD	99
		1	AZD	57
		1	AZD	28
		1	AZD	43
		1	AZD	41
		1	AZD	12
		1	AZD	19
		1	AZD	50
		1	AZD	47
		1	AZD	137
		1	AZD	38
		1	AZD	47
		1	AZD	36
		1	AZD	40
		1	AZD	43
		1	AZD	89
		1	AZD	28
		1	AZD	51
		1	AZD	37
		1	AZD	34
		1	AZD	161
		1	AZD	33
		1	AZD	43
		1	AZD	25
		1	AZD	40
		1	AZD	34
		1	AZD	27
		1	AZD	40
		1	AZD	37
		1	AZD	32
		1	AZD	31
		1	AZD	25
		1	AZD	8
		1	AZD	27
		1	AZD	34
		1	AZD	27
		1	AZD	167
		1	AZD	17
		1	AZD	62
		1	AZD	41
		1	AZD	34
		1	AZD	23
		1	AZD	16
		1	AZD	26
		1	AZD	63
		1	AZD	30
		1	AZD	18
		1	AZD	26
		1	AZD	25
		1	AZD	37
		1	AZD	26
		1	AZD	36
		1	AZD	29
		1	AZD	38
		1	AZD	23
		1	AZD	80
		1	AZD	30
		1	AZD	15
		1	AZD	20
		1	AZD	21
		1	AZD	82
		1	AZD	31
		1	AZD	28
		1	AZD	42
		1	AZD	15
		1	AZD	22
		1	AZD	39
		1	AZD	15
		1	AZD	39
		1	AZD	37
		1	AZD	90
		1	AZD	77
		1	AZD	12
		1	AZD	37
		1	AZD	33
		1	AZD	37
		1	AZD	38
		1	AZD	31
		1	AZD	14
		1	AZD	63
		1	AZD	32
		1	AZD	25
		1	AZD	14
		1	AZD	41
		1	AZD	19
		1	AZD	19
		1	AZD	11
		1	AZD	21
		1	AZD	23
		1	AZD	47
		1	AZD	60
		1	AZD	26
		1	AZD	26
		1	AZD	34
		1	AZD	24
		1	AZD	17
		1	AZD	41
		1	AZD	66
		1	AZD	34
		1	AZD	7
		1	AZD	5
		1	AZD	34
		1	AZD	8
		1	AZD	42
		1	AZD	19
		1	AZD	11
		1	AZD	63
		1	AZD	95
		1	AZD	109
		1	AZD	72
		1	AZD	79
		1	AZD	51
		1	AZD	53
		1	AZD	40
		1	AZD	92
		1	AZD	43
		1	AZD	61
		1	AZD	22
		1	AZD	24
		1	AZD	35
		1	AZD	36
		1	AZD	35
		1	AZD	32
		1	AZD	33
		1	AZD	45
		1	AZD	35
		1	AZD	36
		1	AZD	42
		1	AZD	30
		1	AZD	31
		1	AZD	25
		1	AZD	31
		1	AZD	28
		1	AZD	10
		1	AZD	44
		1	AZD	18
		1	AZD	29
		1	AZD	30
		1	AZD	14
		1	AZD	58
		1	AZD	48
		1	AZD	38
		1	AZD	9
		1	AZD	34
		1	AZD	63
		1	AZD	11
		1	AZD	22
		1	AZD	29
		1	AZD	23
		1	AZD	35
		1	AZD	49
		1	AZD	179
		1	AZD	31
		1	AZD	11
		1	AZD	30
		1	SN38+AZD	61
		1	SN38+AZD	35
		1	SN38+AZD	64
		1	SN38+AZD	55
		1	SN38+AZD	40
		1	SN38+AZD	38
		1	SN38+AZD	62
		1	SN38+AZD	56
		1	SN38+AZD	31
		1	SN38+AZD	24
		1	SN38+AZD	29
		1	SN38+AZD	10
		1	SN38+AZD	23
		1	SN38+AZD	9
		1	SN38+AZD	62
		1	SN38+AZD	60
		1	SN38+AZD	60
		1	SN38+AZD	53
		1	SN38+AZD	32
		1	SN38+AZD	15
		1	SN38+AZD	12
		1	SN38+AZD	36
		1	SN38+AZD	37
		1	SN38+AZD	42
		1	SN38+AZD	18
		1	SN38+AZD	29
		1	SN38+AZD	50
		1	SN38+AZD	26
		1	SN38+AZD	44
		1	SN38+AZD	47
		1	SN38+AZD	31
		1	SN38+AZD	12
		1	SN38+AZD	39
		1	SN38+AZD	9
		1	SN38+AZD	45
		1	SN38+AZD	37
		1	SN38+AZD	34
		1	SN38+AZD	21
		1	SN38+AZD	13
		1	SN38+AZD	12
		1	SN38+AZD	32
		1	SN38+AZD	26
		1	SN38+AZD	5
		1	SN38+AZD	35
		1	SN38+AZD	15
		1	SN38+AZD	19
		1	SN38+AZD	18
		1	SN38+AZD	24
		1	SN38+AZD	27
		1	SN38+AZD	69
		1	SN38+AZD	20
		1	SN38+AZD	93
		1	SN38+AZD	24
		1	SN38+AZD	20
		1	SN38+AZD	58
		1	SN38+AZD	64
		1	SN38+AZD	21
		1	SN38+AZD	33
		1	SN38+AZD	16
		1	SN38+AZD	63
		1	SN38+AZD	52
		1	SN38+AZD	38
		1	SN38+AZD	29
		1	SN38+AZD	40
		1	SN38+AZD	34
		1	SN38+AZD	14
		1	SN38+AZD	17
		1	SN38+AZD	58
		1	SN38+AZD	10
		1	SN38+AZD	42
		1	SN38+AZD	32
		1	SN38+AZD	14
		1	SN38+AZD	72
		1	SN38+AZD	12
		1	SN38+AZD	29
		1	SN38+AZD	47
		1	SN38+AZD	5
		1	SN38+AZD	21
		1	SN38+AZD	23
		1	SN38+AZD	29
		1	SN38+AZD	5
		1	SN38+AZD	9
		1	SN38+AZD	64
		1	SN38+AZD	30
		1	SN38+AZD	50
		1	SN38+AZD	45
		1	SN38+AZD	30
		1	SN38+AZD	46
		1	SN38+AZD	51
		1	SN38+AZD	26
		1	SN38+AZD	32
		1	SN38+AZD	15
		1	SN38+AZD	13
		1	SN38+AZD	37
		1	SN38+AZD	77
		1	SN38+AZD	40
		1	SN38+AZD	16
		1	SN38+AZD	5
		1	SN38+AZD	17
		1	SN38+AZD	48
		1	SN38+AZD	17
		1	SN38+AZD	34
		1	SN38+AZD	57
		1	SN38+AZD	21
		1	SN38+AZD	72
		1	SN38+AZD	17
		1	SN38+AZD	31
		1	SN38+AZD	65
		1	SN38+AZD	16
		1	SN38+AZD	11
		1	SN38+AZD	63
		1	SN38+AZD	38
		1	SN38+AZD	13
		1	SN38+AZD	20
		1	SN38+AZD	15
		1	SN38+AZD	27
		1	SN38+AZD	25
		1	SN38+AZD	22
		1	SN38+AZD	21
		1	SN38+AZD	81
		1	SN38+AZD	29
		1	SN38+AZD	50
		1	SN38+AZD	35
		1	SN38+AZD	11
		1	SN38+AZD	94
		1	SN38+AZD	56
		1	SN38+AZD	40
		1	SN38+AZD	41
		1	SN38+AZD	18
		1	SN38+AZD	47
		1	SN38+AZD	18
		1	SN38+AZD	14
		1	SN38+AZD	30
		1	SN38+AZD	18
		1	SN38+AZD	30
		1	SN38+AZD	46
		1	SN38+AZD	78
		1	SN38+AZD	22
		1	SN38+AZD	24
		1	SN38+AZD	70
		1	SN38+AZD	36
		1	SN38+AZD	25
		1	SN38+AZD	18
		1	SN38+AZD	28
		1	SN38+AZD	8
		1	SN38+AZD	122
		1	SN38+AZD	79
		1	SN38+AZD	87
		1	SN38+AZD	26
		1	SN38+AZD	41
		1	SN38+AZD	67
		1	SN38+AZD	27
		1	SN38+AZD	31
		1	SN38+AZD	45
		1	SN38+AZD	104
		1	SN38+AZD	75
		1	SN38+AZD	20
		1	SN38+AZD	83
		1	SN38+AZD	57
		1	SN38+AZD	64
		1	SN38+AZD	68
		1	SN38+AZD	27
		1	SN38+AZD	35
		1	SN38+AZD	87
		1	SN38+AZD	96
		1	SN38+AZD	53
		1	SN38+AZD	38
		1	SN38+AZD	25
		1	SN38+AZD	32
		1	SN38+AZD	39
		1	SN38+AZD	12
		1	SN38+AZD	26
		1	SN38+AZD	35
		1	SN38+AZD	20
		1	SN38+AZD	156
		1	SN38+AZD	42
		1	SN38+AZD	58
		1	SN38+AZD	46
		1	SN38+AZD	9
		1	SN38+AZD	28
[truncated: 3,658 more rows]
