# Supplementary material for: TopBP1 biomolecular condensates as a new therapeutic target in advanced-stage colorectal cancer
Source: eLife journal article supplement (doi:10.7554/elife.106196), 2025-05-15
Supplement: fig3-data3 [file data mean fibers.xlsx]

## Sheet: Feuil1
Non treated			SN-38			AZD2858			SN-38 + AZD2858
120	51	40	75	47	39	47	66	59	61	57	28
84	20	38	22	30	33	38	60	50	35	8	54
90	58	57	39	33	87	81	31	58	64	10	47
64	47	96	31	47	33	117	32	51	55	30	20
50	45	63	38	49	15	55	28	47	40	45	17
62	41	35	19	22	36	47	33	48	38	29	26
62	45	39	93	27	11	42	19	50	62	19	16
126	11	23	74	58	48	43	38	44	56	43	52
60	53	34	38	10	33	44	30	53	31	40	50
53	43	28	79	17	29	44	47	47	24	13	38
62	55	41	19	39	29	37	33	46	29	72	21
54	37	38	50	15	56	43	29	34	10	16	50
49	26	36	73	43	14	47	47	44	23	52	62
53	40	48	22	30	32	32	58	47	9	47	70
47	38	42	20	24	27	43	23	47	62	87	54
51	28	51	14	35	41	27	28	44	60	73	3
51	34	44	28	7	42	29	22	46	60	15	68
40	46	62	79	96	21	50	41	39	53	17	30
46	35	21	11	33	36	29	46	50	32	40	39
125	26	23	55	49	42	55	20	45	15	71	64
45	34	33	67	53	26	79	24	42	12	30	17
109	42	40	11	30	30	29	47	46	36	64	4
48	23	27	17	25	50	74	25	38	37	20	67
44	49	51	19	43	37	35	28	63	42	28	69
49	22	32	32	50	47	69	56	51	18	24	27
49	36	6	30	16	40	16	33	43	29	19	34
40	47	27	39	26	37	21	41	26	50	32	31
43	67	41	51	27	9	44	32	40	26	31	32
51	49	33	51	30	39	86	68	38	44	41	40
84	71	47	24	9	33	85	72	45	47	40	34
41	41	35	13	34	85	105	16	28	31	66	35
31	48	36	13	54	33	67	33	45	12	51	29
42	37	42	69	28	41	48	77	54	39	25	32
51	36	31	33	32	17	20	28	57	9	70	40
15	63	28	23	15	61	71	37	41	45	49	22
36	38	32	7	20	20	39	37	37	37	70	13
43	31	32	45	31	46	58	17	31	34	62	18
44	53	33	24	16	38	33	40	37	21	20	25
32	29	20	75	37	22	37	62	34	13	43	34
21	32	22	55	63	43	36	45	29	12	46	66
28	27	41	60	32	24	40	12	53	32	38	53
69	46	31	78	30	24	36	43	70	26	56	36
37	38	49	20	34	40	41	37	56	5	40	36
41	40	38	19	10	27	28	31	47	35	64	12
28	34	27	36	44	17	44	17	36	15	39	26
40	34	33	49	44	6	31	38	43	19	40	32
44	10	35	39	15	41	13	33	50	18	36	30
35	28	43	42	35	16	31	28	42	24	6	45
40	65	24	37	31	14	30	22	28	27	15	20
44	112	5	24	31	15	67	31	51	69	18	29
72	74	32	41	17	52	24	21	38	20	33	61
46	60	17	19	24	46	30	25	46	93	49	31
53	49	36	5	58	39	31	37	44	24	35	25
84	53	38	44	67	41	30	54	39	20	37	29
51	72	29	51	21	40	26	26	31	58	49	23
41	39	21	31	42	21	29	32	38	64	32	61
21	38	21	16	32	41	22	36	62	21	38	25
91	37	11	63	44	79	23	28	32	33	25	58
48	47	43	66	22	50	33	29	34	16	19	33
108	36	32	93	16	32	63	68	35	63	68	35
32	34	30	20	11	43	40	83	15	52	70	36
10	43	48	47	21	29	34	63	35	38	49	25
4	33	39	17	38	17	80	54	32	29	23	38
39	36	30	26	44	21	22	42	24	40	54	30
33	39	36	12	26	21	31	50	27	34	42	46
4	34	36	50	39	15	31	55	35	14	48	44
39	34	37	35	18	14	45	42	29	17	31	113
68	34	32	43	44	55	35	57	26	58	18	97
44	29	44	19	4	41	65	39	28	10	28	26
103	29	30	24	30	12	20	42	26	42	43	35
20	35	14	40	40	8	34	46	34	32	27	50
44	35	42	20	5	18	37	14	20	14	15	57
43	44	36	39	29	43	15	55	46	72	30	35
13	39	34	32	27	16	39	52	28	12	25	18
66	58	33	13	32	30	16	44	10	29	47	60
34	42	39	38	41	2	60	51	36	47	70	13
45	60	36	13	34	45	42	19	27	5	57	28
34	37	34	60	28	20	31	54	103	21	55	50
42	41	47	29	67	47	132	47	55	23	53	40
28	48	38	9	15	28	65	36	41	29	9	45
40	87	43	48	49	31	42	42	53	5	48	20
40	48	38	9	26	11	47	47	41	9	38	23
12	38	37	34	21	20	39	41	38	64	42	12
54	49	41	14	26	18	24	41	62	30	25	29
20	49	42	20	26	37	44	54	44	50	38	50
10	74	38	26	24	13	48	75	31	45	38	41
58	48	32	36	44	23	38	48	38	30	25	34
100	45	36	51	35	26	31	17	47	46	84	29
11	42	36	40	34	34	39	62	42	51	42	25
31	42	36	9	40	35	45	38	57	26	37	26
10	39	37	14	25	53	67	57	49	32	40	54
3	17	38	22	19	13	42	39	20	15	32	27
25	39	47	38	22	53	36	46	24	13	52	51
27	39	32	45	29	43	90	56	42	37	13	45
36	40	30	25	29	20	80	47	45	77	12	30
32	41	51	28	28	39	35	53	43	40	27	26
32	35	31	31	19	13	25	41	36	16	38	29
32	14	31	14	56	16	25	38	33	5	5	42
29	64	7	39	15	28	34	79	31	17	24	18
55	36	36	32	37	11	35	26	22	48	42	21
28	35	19	39	22	4	36	56	33	17	84	43
33	26	27	45	37	6	18	28	75	34	59	39
39	29	41	40	31	37	7	35	76	57	68	11
31	58	50	7	25	23	42	42	33	21	15	33
34	31	35	9	30	33	23	37	65	72	41	64
22	31	42	66	21	56	25	20	57	17	58	32
42	12	44	36	42	37	48	53	80	31	39	54
103	24	34	22	32	24	43	64	57	65	37	37
28	29	32	89	58	15	18	71	51	16	36	25
35	27	35	18	15	25	48	72	59	11	24	32
30	40	32	26	26	21	7	54	44	63	5	28
51	34	42	35	39	18	35	56	42	38	36	13
16	27	27	36	146	20	27	55	74	13	44	91
24	30	48	36	12	34	7	55	40	20	14	41
26	61	28	36	45	25	9	57	50	15	45	29
18	41	27	17	10	13	95	56	44	27	45	39
38	35	41	20	39	48	11	42	39	25	16	36
29	20	23	12	30	30	21	51	104	22	71	27
13	27	11	15	22	71	53	43	45	21	10	85
53	47	101	25	14	45	58	43	19	81	16	34
29	44	45	42	24	18	71	49	27	29	37	12
28	41	42	2	30	27	49	45	42	50	20	42
22	39	34	48	33	31	35	43	32	35	25	30
29	37	39	42	31	39	44	47	40	11	41	36
46	18	45	48	43	54	48	52	28	94	20	51
23	41	39	30	40	29	110	54	22	56	24	81
34	34	29	14	40	38	10	6	32	40	31	50
26	45	36	40	31	11	29	40	51	41	19	60
17	34	46	11	60	26	28	45	32	18	25	50
49	28	28	37	38	48	36	37	26	47	85	35
58	37	38	9	27	40	30	50	43	18	57	20
34	62	31	29	37	41	67	45	37	14	3	38
24	30	41	13	29	26	38	64	14	30	59	27
55	49	39	45	38	29	36	40	11	18	34	11
34	45	32	49	35	42	67	35	37	30	14	27
27	46	41	11	21	45	31	65	43	46	27	45
24	69	37	29	37	58	32	43	23	78	27	29
42	29	56	39	33	55	31	36	74	22	19	30
11	45	45	43	51	17	30	41	24	24	18	14
17	38	47	13	14	37	31	40	67	70	33	31
22	36	40	22	15	16	30	52	61	36	27	36
33	34	27	39	20	16	18	30	107	25	70	33
30	66	38	26	4	29	36	35	58	18	32	34
37	24	62	25	37	24	32	47	46	28	13	44
47	27	60	43	25	21	33	84	49	8	17	23
34	23	79	24	30	13	13	36	41	122	45	81
37	68	41	54	19	38	39	39	21	79	21	11
39	26	34	32	15	42	45	39	64	87	32	36
41	51	79	57	23	34	43	84	76	26	16	25
40	43	24	41	33	47	29	55	40	41	43	26
70	34	83	37	40	21	66	52	42	67	69	25
32	44	50	14		5	21	44	38	27	33	34
35	29	30	12		31	71	43	39	31	22	70
22	32	53	33		12	25	50	55	45	29	54
37	21	80	33		34	48	40	52	104	43	45
21	27	30	10		33	95	45	65	75	21	46
64	41	53	35		36	150	48	52	20	65	24
24	14	56	38		11	24	36	43	83	18	27
24	38	40	23		43	21	75	50	57	26	36
24	36	23	72		37	42	66	43	64	13	35
26	72	29	53		43	41	60	50	68	37	51
27	77	47	44		27	4	47	47	27	28	58
27	128	28	13		22	33	51	98	35	23	34
29	87	63	47		7	27	48	168	87	11	50
16	73	68	53		52	28	48	46	96	62	63
4	58	53	49		34	57	48	58	53	9	9
17	58	60	53		47	40	43	34	38	131	29
20	59	57	32		32	38	45	42	25	17	29
20	51	64	19		13	48	54	58	32	41	27
20	50	51	26		51	64	44	34	39	50	27
31	40	51	19		29	51	25	41	12	18	23
28	49	52	39		25	98	39	22	26	35	30
201	52	51	9		34	51	32	37	35	25	39
29	53	57	27		26	13	42	35	20	47	30
124	50	48	34		14	213	48	40	156	31	33
77	52	37	32		32	47	39	40	42	37	15
29	49	43	45		50	81	35	27	58	54	64
56	46	35	44		20	41	81	19	46	55	41
87	45	28	24		34	86	63	12	9	39	21
58	48	73	21		20	40	49	73	28	68	42
49	57	53	10		52	48	44	76	41	51	43
45	54	45	48		38	34	63	64	83	13	33
29	46	22	41		19	60	43	67	101	32	23
39	45	38	26		24	29	32	91	105	35	67
39	43	54	19		19	69	28	54	58	9	25
30	41	61	24		33	45	44	67	112	61	30
22	117	118	30		12	11	76	73	41	9	32
41	44	105	16		69	26	47	53	57	46	20
45	93	59	10		19	66	51	34	60	36	70
45	40	55	20		11	20	39	55	39	35	14
39	38	76	37		28	94	32	43	18	24	12
62	41	54	23		15	39	71	48	33	26	22
36	38	56	33		13	41	65	42	19	17	28
39	44	49	43		21	25	67	45	13	19	20
34	56	56	31		22	47	46	42	49	30	12
35	43	53	29		91	67	78	40	93	38	21
122	40	43	62		44	47	64	35	36	33	37
40	31	90	31		57	46	48	36	24	38	25
28	63	51	23		20	47	64	41	91	26	12
29	37	53	33		25	21	50	35	29	32	52
32	62	47	23		39	89	34	39	27	16	25
40	73	48	14		39	73	36	43	17	29	93
39	55	56	52		21	41	39	40	86	35	75
51	17	38	31		30	42	19	38	85	47	16
32	55	82	43		25	18	27	39	92	19	47
33	44	57	23		9	39	33	48	19	52	49
17	47	47	16		48	32	29	50	81	52	28
62	49	29	23		31	33	49	29	32	18	45
32	44	66	58		19	43	46	35	97	34	67
48	48	54	25		32	8	82	36	38	53	18
32	45	78	25		28	40	63	78	32	85	21
71	45	63	32		80	13	59	34	34	46	113
29	34	131	49		14	90	5	42	32	44	114
28	39	61	32		32	19	55	42	33	27	38
19	83	57	9		25	9	55	39	17	30	35
18	55	103			37	119	133	60	18	14	48
32	38	60			31	91	45	36	75	32	60
28	55	46			13	59	43	40	56	21	25
35	37	9			47	49	72	31	9	29	55
14	33	53			18	50	41	39	46	18	47
31	56	52			21	45	22	41	76	50	35
32	41	48			35	43	64	27	44	31	55
26	34	47			28	31	22	21	20	23	42
57	112	51			48	55	14	43	5	18	28
39	49	13			31	18	29	29	45	20	43
52	83	58			36	70	107	26	35	64	24
32	41	38			56	56	48	14	107	18	47
40	57	36			33	20	51	27	31	41	67
78	36	50			44	36	48	35	49	36	26
38	33	40			20	47	84	30	42	46	82
2	43	56			40	17	54	32	30	46	9
30	61	56			15	51	20	7	10	27	55
46	52	32			29	37	75	35	11	31	14
9	64	25			76	42	20	40	29	33	26
64	54	44			31	24	29	36	19	51	53
48	42	2				53	47	40	28	16	58
37	80	41				54	53	43	37	19	54
25	87	30				59	42	42	36	32	13
20	69	35				40	64	40	45	58	43
28	44	47				39	52	18	19	51	42
47	46	39				44	60	30	29	36	26
38	61	40				27	63	36	28	27	36
11	46	36				26	47	37	51	36	29
22	52	10				30	48	61	33	17	23
16	95	44				41	47	29	20	73	40
5	46	26				37	51	62	22	5	44
53	40	42				35	49	37	33	11	70
23	43	31				54	53	28	45	14	43
57	41	73				31	50	46	58	14	37
69	56	87				34	46	27	29	77	44
48	46	50				28	42	16	61	17	33
56	50	42				40	122	31	15	13	37
28	55	41				33	48	46	55	16	40
44	24	22				50	47	43	16	81	37
40	30	39				27	51	53	36	10	44
52	47	34				19	50	37	41	13	24
44	52	35				10	43	83	70	64	48
42	34	43				53	35	91	19	86	66
21	42	31				46	31	52	42	54	55
36	21	32				76	38	46	33	49	56
48	67	47				65	39	26	68	58	71
21	38	32				25	66	49	4	47	23
51	55	46				42	32	61	15	10	4
13	31	33				42	58	32	11	44	64
69	39	38				30	47	55	20	34	13
41	23	52				76	30	55	35	91	67
67	24	44				55	81	34	76	14	31
106	61	22				46	25	169	44	7	30
53	105	40				85	31	89	38	44	37
35	55	47				38	26	61	18	65	18
35	47	45				31	53	59	46	27	33
36	58	41				30	39	72	37	55	24
43	24	50				55	28	51	37	75	22
44	15	50				18	43	57	51	35	23
20	38	42				22	56	55	45	19	26
26	36	34				60	67	46	90	37	41
40	49	36				108	66	45	67	18	31
122	65	25				58	51	57	38	25	210
65	35	33				37	67	41	30	56	14
30	74	34				53	52	59	44	22	14
58	38	45				75	77	37	34	4	30
57	61	34				45	53	29	30	9	35
35	56	39				129	86	33	51	7	36
59	19	46				115	79	26	30	31	29
46	60	42				35	43	92	28	17	33
44	37	30				49	39	68	32	92	73
46	40	38				38	40	53	38	13	41
32	54	56				49	40	50	11	27	38
41	67	36				58	33	50	24	14	34
67	63	31				29	36	57	40	25	69
64	57	30				80	39	45	19	31	35
65	54	40				24	47	54	39	23	51
30	52	78				60	31	37	17	9	38
26	37	61				43	28	34	42	27	18
37	45	59				38	31	25	30	17	52
35	41	57				49	34	48	38	22	12
47	57	58				34	27	32	48	63	142
90	42	48				50	40	27	13	40	43
72	29	52				53	44	32	44	49	42
30	35	45				39	29	28	27	63	51
32	14	47				29	21	46	18	28	4
38	53	39				62	28	29	29	35	29
67	49	51				35	45	33	22	53	34
105	59	51				47	51	67	29	21	16
44	65	42				50	38	36	34	73	29
73	48	15				78	42	37	58	20	25
64	46	83				27	72	37	33	42	36
41	49	64				78	71	36	19	27	50
36	90	39				42	27	34	31	36	21
47	48	23				36	85	107	26	74	43
56	36	48				15	56	70	34	45	26
20	60	43				20	52	66	125	44	17
37	37	51				39	46	47	58	31	17
37	57	40				44	53	50	29	20	26
38	48	105				10	55	57	42	9	15
43	101	41				51	45	52	26	56	26
27	50	30				43	46	47	32	52	52
40	39	39				34	41	81	42	21	45
158	115	43				40	89	26	47	11	46
86	41	59				36	39	52	55	47	29
73	61	44				44	38	34	23	6	33
60	69	47				16	31	60	21	41	13
53	42	57				52	37	59	26	30	61
66	57	47				27	92	83	47	45	16
56	41	68				30	39	39	29	36	44
29	38	40				53	35	68	36	34	31
73	48	52				10	46	24	24	35	47
116	22	50				20	36	46	46	48	51
40	53	48				12	33	50	60	13	39
52	33	44				119	34	100	18	24	37
56	52	44				46	85	99	16	17	33
50	62	47				36	31	37	15	20	30
45	51	41				37	41	50	44	8	46
40	40	31				29	23	51	59	27	41
74	94	47				98	35	58	39	29	23
38	59	41				205	57	93	9	45	36
38	42	46				77	36	53	20	13	32
34	35	68				55	63	51	28	18	31
37	38	107				56	42	54	22	25	27
56	37	68				51	29	38	30	26	39
37	57	34				72	37	53	49	12	71
49	64	60				45	36	38	34	32	46
33	53	31				63	38	22	11	24	38
36	48	27				38	32	39	52	13	43
34	58	47				47	34	64	33	11	53
43	57	37				41	36	22	33	20	45
89	52	32				38	47	2	43	45	65
33	85	39				42	31	45	40	47	41
26	18	35				30	40	44	40	18	17
39	48	47				35	31	51	54	69	38
38	75	10				51	31	42	38		36
119	50	77				37	28	45	8		21
22	51	68				46	30	31	33		35
41	36	79				48	30	37	28		30
14	43	34				51	27	19	59		38
37	4	49				22	30	92	30		48
70	41	56				123	30	140	17		36
70	69	47				34	27	53	41		31
86	46	44				24	21	42	12		49
67	37	49				19	78	47	58		59
52	9	50				27	72	37	40		11
56	59	45				81	82	31	46		66
48	67	41				33	60	37	38		15
54	16	38				15	55	42	39		26
8	36	67				52	60	58	40		25
53	30	39				58	59	44	29		10
46	23	64				37	82	41	40		30
50	42	38				15	47	35	11		11
34	51	54				44	58	59	14		75
45	25	46				27	46	33	18		43
51	21	51				14	56	35	70		11
43	21	43				37	50	9	27		27
63	52	83				21	47	14	53		4
41	39	34				42	52	35	26		33
38	15	29				6	50	30	29		19
22	21	61				32	44	94	27		36
39	34	123				44	41	77	50		18
38	27	91				37	56	78	90		56
30	39	72				50	27	60	34		40
52	74	70				50	38	57	19		39
31	58	12				47	52	53	9		13
47	46	152				46	44	56	61		31
37	52	53				75	62	75	39		51
49	43	49				42	43	69	15		25
51	46	46				27	33	48	49		25
41	47	47				38	33	43	27		16
30	44	138				41	21	82	33		17
37	49	57				22	29	48	13		32
27	64	36				48	34	52	22		6
40	43	65				40	37	43	30		32
25	42	59				39	36	36	19		59
19	36	53				131	61	41	17		106
30	36	45				75	55	87	30		55
83	32	49				53	61	44	60		37
19	39	53				62	56	26	138		28
39	36	42				78	53	58	18		21
25	14	31				53	51	67	29		17
29	33	36				41	39	41	40		35
29	35	62				44	46	50	33		10
39	48	67				43	30	31	30		48
49	29	58				41	42	32	31		25
35	20	57				57	59	23	51		35
36	29	52				40	33	41	66		39
29	25	51				38	33	32	13		32
28	32	46				51	22	28	50		13
48	20	60				53	37	31	29		25
52	36	147				57	25	39	4		69
35	137	53				40	52	79	38		49
16	43	50				28	28	62	31		71
19	61	65				56	36	148	16		15
34	58	41				59	32	124	90		36
31	58	69				56	51	55	34		33
68	56	43				7	67	50	22		10
28	51	41				10	58	54	31		11
39	51	35				94	45	48	36		88
36	49	42				49	52	31			44
46	55	59				86	50	47			83
12	31	32				54	62	55			34
153	52	64				41	54	45			11
87	31	54				44	67	51			25
99	60	53				33	48	43			36
44	85	45				46	60	93			39
72	38	37				12	46	42			34
65	31	25				23	46	57			14
54	52	46				51	68	35			35
118	40	45				65	54	26			26
43	46	21				43	13	46			32
35	38	46				36	42	23			93
33	41	70				35	53	28			24
61	45	45				47	57	41			34
33	44	29				39	65	48			22
34	33	36				14	76	45			34
40	46	20				38	77	38			25
28	33	9				31	54	55			32
29	52	33				166	53	35			36
48	35	41				10	64	78			30
104	26	15				49	37	54			31
42	29	45				41	30	23			43
109	31	38				27	39	44			13
42	38	52				47	56	40			43
57	33	66				20	41	37			14
39	60	74				24	35	49			29
102	37	47				65	34	35			36
34	16	38				61	37	35			54
43	37	45				48	38	38			43
31	31	31				74	34	49			27
40	40	39				50	38	51			8
91	25	39				54	38	21			43
37	63	47				47	57	25			7
77	50	60				60	35	37			35
56	69	50				47	29	64			11
69	8	37				33	25	80			20
21	46	31				17	24	50			13
59	64	43				40	33	39			40
23	45	37				41	38	42			32
16	33	37				30	41	41			16
77	43	30				19	27	30			43
12	42	68				39	36	46			11
27	69	55				30	27	77			71
10	71	36				42	52	51			21
165	34	78				42	45	47			19
77	61	59				44		100			78
72	60	54				37		44			34
53	51	27				17		53			46
46	37	55				28		27			43
66	40	56				40		51			11
91	40	82				26		44			32
53	43	43				50		42			35
43	38	41				120		41			33
94	41	41				47		42			28
28	41	55				59		71			27
75	39	40				64		39			28
29	42	38				54		38			51
63	36	36				74		41			16
58	52	38				41		41			53
43	41	88				49		10			50
41	22	16				54		49			6
38	41	33				52		37			25
108	24	34				50		36			24
59	19	11				52		37			33
52	43	48				128		35			35
56	74	180				53		45			55
37	35	29				31		43			17
42	40	108				38		8			14
25	68	62				60		64			45
58	12	71				48		12			14
37	62	57				26		54			66
46	48	57				50		16			69
40	32	63				37		44			41
28	96	44				53		61			46
46	107	78				41		59			6
46	70	56				55		41			37
38	81	52				29		35			74
38	11	39				5		39			20
40	55	42				29		44			33
36	33	14				117		44			46
56	50	40				60		36			37
48	48	21				42		45			58
3	67	36				34		6			16
56	21	39				24		21			17
74	31	51				45		52			55
140	41	48				27		46			45
63	35	43				27		31			23
58	30	43				63		33			78
91	46	45				35		34			34
142	37	63				74		46			76
39	102	42				15		48			15
81	26	66				44		44			16
33	24	37				42		42			70
47	45	74				40		75			71
46	20	36				20		61			29
39	25	105				77		50			33
41	41	22				55		54			42
35	23	43				41		41			36
47	36	50				22		45			46
60	59	61				21		44			25
31	22	16				43		44			16
22	30	28				127		50			61
39	23	37				37		42			35
40	29	71				87		33			49
33	32	37				31		36			32
59	31	23				29		32			10
101	34	39				44		99			6
20	36	38				32		55			29
52	21	28				29		43
38	34	20				29		65
37	83	38				30		69
25	99	54				34		54
31	92	55				28		39
43	71	27				32		27
42	89	30				25		71
31	48	28				34		55
37	62	26				20		30
52	11	86				36		45
50	44					37		26
28	49					28		15
26	51					31		53
119	51					22		51
103	59					95		57
164	55					26		42
51	47					28		49
23	57					49		19
52	31					42		29
51	60					39		53
56	38					25		38
22	45					30		67
43	39					20		57
69	46					6		38
52	42					33
44	41					45
52	37					14
32	41					29
17	39					31
86	42					44
37	40					48
39	36					42
37	35					6
44	31					32
74	27					15
65	37					18
33	33					64
40	31					146
30	53					33
41	44					114
9	38					108
29	4					34
48	24					31
23	66					65
40	54					82
4	54					33
21	49					57
38	48					80
78	57					91
39	40					75
36	32					45
41	56					146
45	38					60
20	41					52
66	48					58
61	13					99
42	42					57
52	26					28
78	27					43
55	22					41
76	27					12
23	25					19
48	42					50
62	38					47
79	39					137
47	33					38
43	80					47
31	45					36
64	59					40
42	58					43
112	50					89
40	54					28
52	54					51
38	41					37
35	22					34
32	40					161
36	41					33
22	44					43
52	45					25
56	43					40
46	81					34
29	33					27
16	35					40
49	49					37
51	46					32
13	34					31
33	30					25
101	31					8
63	30					27
62	31					34
69	77					27
59	21					167
43	34					17
56	58					62
42	26					41
47	16					34
41						23
36						16
46						26
63						63
40						30
24						18
36						26
32						25
40						37
22						26
24						36
18						29
12						38
30						23
40						80
26						30
94						15
99						20
55						21
107						82
88						31
79						28
12						42
50						15
33						22
55						39
73						15
60						39
52						37
38						90
46						77
47						12
183						37
88						33
46						37
46						38
52						31
100						14
47						63
23						32
63						25
35						14
103						41
42						19
67						19
32						11
6						21
49						23
41						47
30						60
54						26
59						26
53						34
40						24
33						17
46						41
31						66
69						34
35						7
45						5
29						34
34						8
66						42
56						19
24						11
63						63
23						95
49						109
26						72
24						79
28						51
23						53
15						40
62						92
40						43
54						61
20						22
42						24
45						35
14						36
24						35
50						32
60						33
60						45
38						35
394						36
43						42
21						30
79						31
243						25
73						31
60						28
51						10
54						44
61						18
72						29
52						30
61						14
61						58
43						48
110						38
45						9
30						34
54						63
48						11
39						22
31						29
92						23
61						35
40						49
47						179
9						31
35						11
34						30
54
43
55
24
70
43
40
49
28
38
27
40
32
43
25
35
20
41
30
19
35
22
32
68
68
51
47
99
55
45
87
131
49
30
39
39
41
45
38
54
71
56
36
32
53
47
62
42
46
35
52
26
26
48
46
30
61
43
126
45
38
43
67
9
53
96
46.9338	44.6742	45.4625	33.4465	32.0861	31.6128	43.8828	45.4165	45.8814	38.1205	35.3686	36.9733	arithmetic
40.54	41.1797	41.515	28.5301	28.2588	27.5467	37.5475	42.4086	42.0652	31.8697	29.8455	31.8911	geometric
arithmetic				geometric
NT	S	A	AS	NT	S	A	AS
46.9338	33.4465	43.8828	38.1205	40.54	28.5301	37.5475	31.8697
44.6742	32.0861	45.4165	35.3686	41.1797	28.2588	42.4086	29.8455
45.4625	31.6128	45.8814	36.9733	41.515	27.5467	42.0652	31.8911
