# Supplementary material for: TopBP1 biomolecular condensates as a new therapeutic target in advanced-stage colorectal cancer
Source: eLife journal article supplement (doi:10.7554/elife.106196), 2025-05-15

**Figure 4.D**

|                     |   |   |     |     |     |     |
|---------------------|---|---|-----|-----|-----|-----|
| AZD2858 (100 nM)    | - | + | -   | +   | -   | +   |
| SN-38 (nM)          | - | + | 1.5 | 1.5 | 1.5 | 1.5 |
| 5-Fluorouracil (nM) | - | - | -   | -   | 222 | 222 |

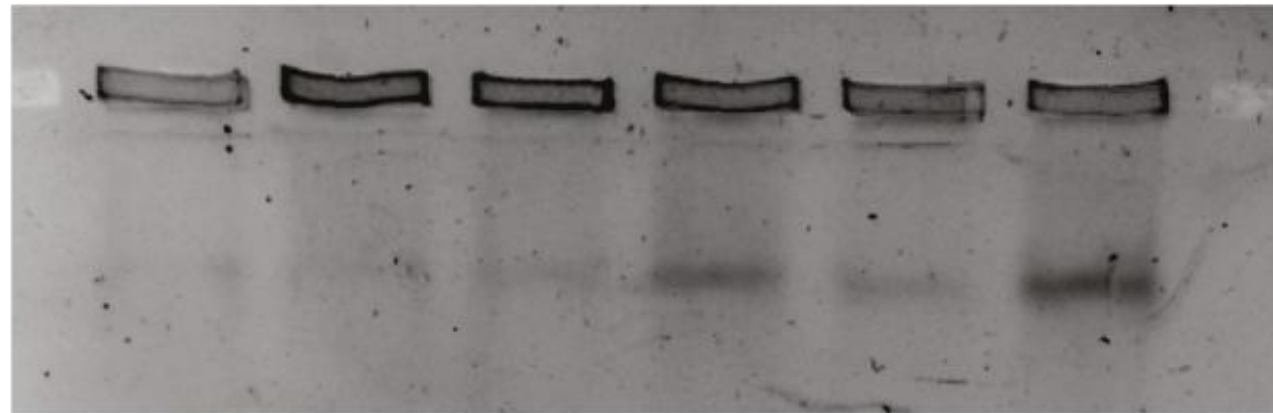

**Figure 4D, Source Data 1.** Below are the Original membranes corresponding to Figure 4D.  
PFGE analysis of DNA damage in HCT116 cells incubated for 48 h as described in Figure 4A

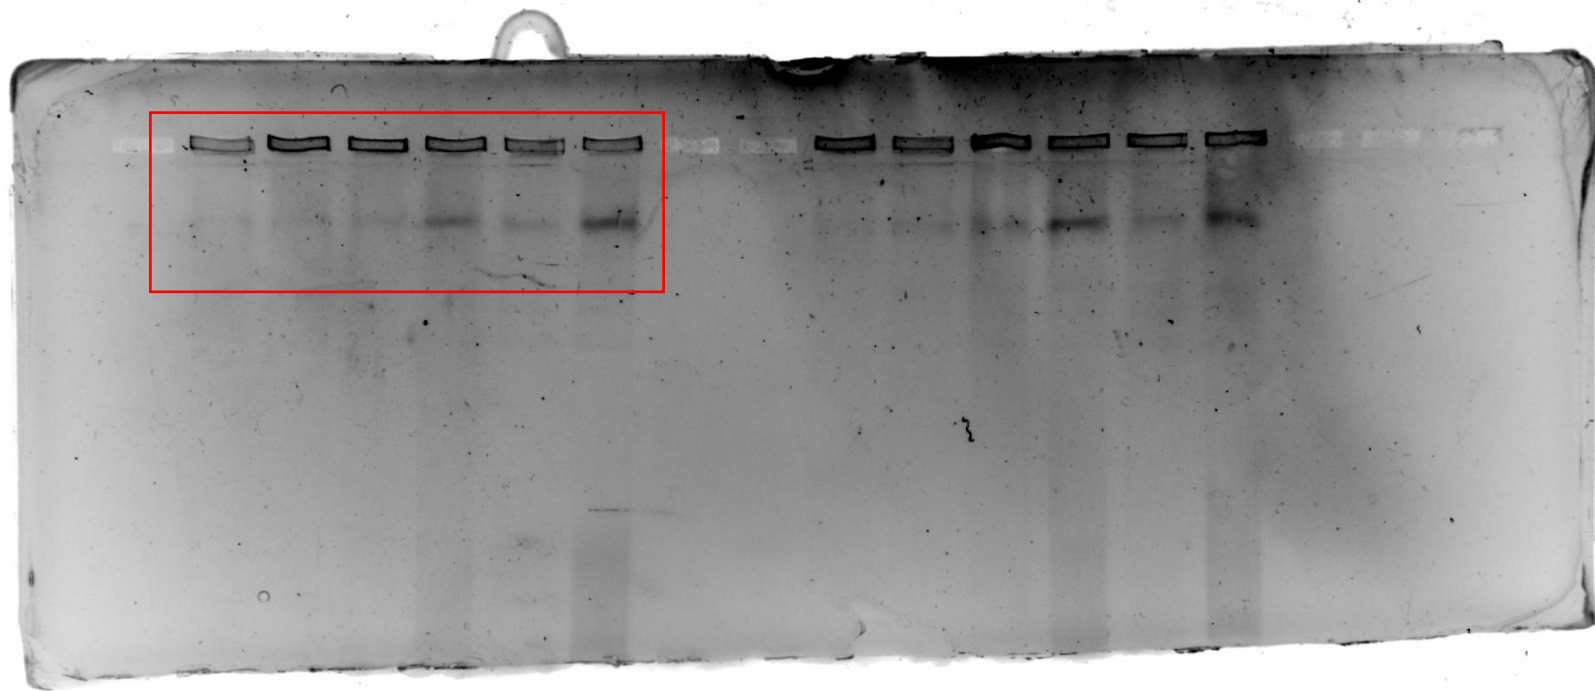

Supplement: fig4-data1 [file Fig 4D- Source Data 1.pdf › Fig 4C and D- Source Data 1/Fig 4D- Source Data 1.pdf]
