# Supplementary material for: TopBP1 biomolecular condensates as a new therapeutic target in advanced-stage colorectal cancer
Source: eLife journal article supplement (doi:10.7554/elife.106196), 2025-05-15
Supplement: fig4-data3 [file Results_linear_modeling.xlsx]

## Sheet: Sheet1
Estimation of effect (amplitude and p-value) by linear modeling:
Effect of experimental condition (compared to "NT") :				Effect of experimental condition (compared to "S") :				Effect of experimental condition (compared to "F") :
Condition	Effect on percentage of subG1	p-value		Condition	Effect on percentage of subG1	p-value		Condition	Effect on percentage of subG1	p-value
A	-0.05329	0.99220		NT	-9.610	0.10089		S	-8.341	0.147855
AF	+56.43905	9.19e-07		A	-9.663	0.09926		NT	-17.951	0.007057
AS	+46.09911	5.79e-06		AF	+46.829	5.03e-06		A	-18.004	0.006939
F	+17.95105	0.00706		AS	+36.489	4.40e-05		AF	+38.488	2.8e-05
S	+9.60998	0.10089		F	+8.341	0.14786		AS	+28.148	0.000351
Effect of replicate identity (compared to replicate #1) :
Replicate	Effect on percentage of subG1	p-value
2	+12.45762	0.00784
3	+11.50860	0.01204
