# Supplementary material for: TopBP1 biomolecular condensates as a new therapeutic target in advanced-stage colorectal cancer
Source: eLife journal article supplement (doi:10.7554/elife.106196), 2025-05-15
Supplement: fig4-data3 [file test norm facs.xlsx]

## Sheet: Sheet1
			N1
			All	SubG1	Alive
		NT	19580	623	18957
		A	19702	827	18875
		S	19698	1432	18266
		AS	19224	5891	13333
		F	17265	2886	14379
		AF	16212	7791	8421
			N2
			All	SubG1	Alive
		NT	19830	992	18838
		A	19164	957	18207
		S	19207	3384	15823
		AS	19304	11889	7415
		F	19377	5028	14349
		AF	19285	13434	5851
			N3
			All	SubG1	Alive
		NT	19648	1138	18510
		A	19567	905	18662
		S	19701	3530	16171
		AS	19345	11615	7730
		F	9986	2513	7473
		AF	19164	12567	6597
