# Supplementary figures and images for: TopBP1 biomolecular condensates as a new therapeutic target in advanced-stage colorectal cancer
Source: eLife journal article supplement (doi:10.7554/elife.106196), 2025-05-15

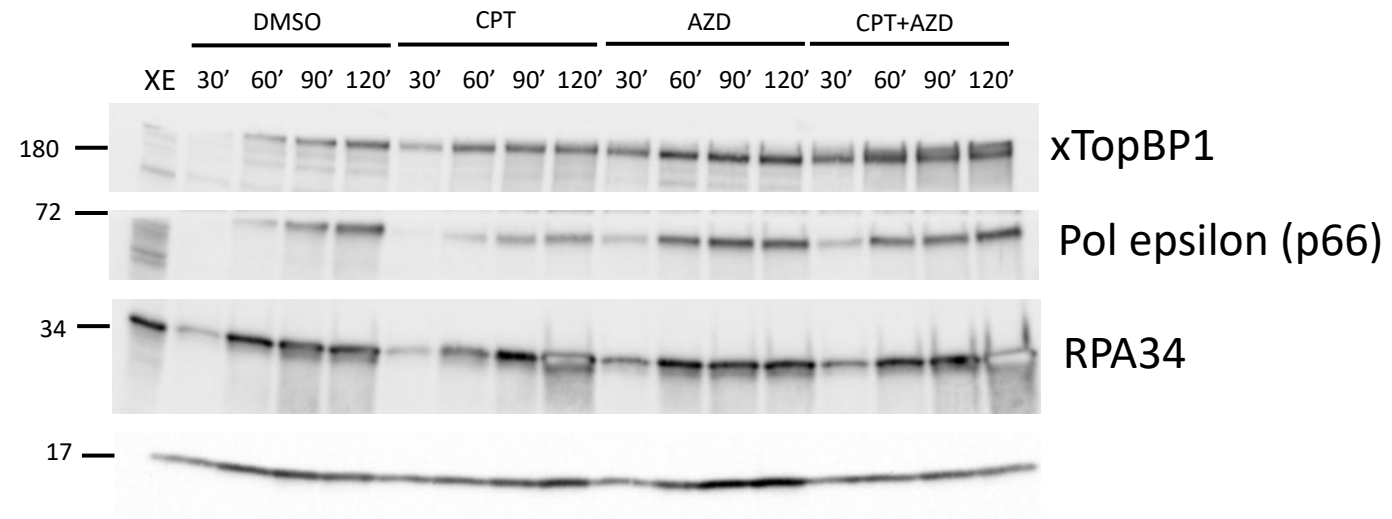

Supplement: fig2-data1 [file Fig2E -Source Data 1.pdf › Fig 2B, D and E- Source Data 1/Fig2E -Source Data 1.pdf]
